# Supplementary material
Source: publisher figshare collection journal article supplement (https://acs.figshare.com/ndownloader/files/6530355)
Supplement: Supplementary file 1 [file 6530355]

data_global
_audit_creation_date                               2016-07-15
_audit_creation_method                            'by CrystalStructure 4.2'
_audit_update_record                               ?


_vrf_PLAT910_248_6_55

;

PROBLEM: Isolated Oxygen Atom (H-atoms Missing ?) ....... O501 Check

RESPONSE: This compound was synthesized in aqueous phase. These isolated Oxygen

Atoms are water. But Hydrogen atoms of water molecules were not located.

This compound is cluster of many tungstens, and hydrogen atoms are not

detectable in crystals which contains much heavier elements.

;

_vrf_PLAT306_248_6_55

;

PROBLEM: Missing # of FCF Reflection(s) Below Theta(Min) 23 Note

RESPONSE: This crystal has large unit cell because molecules size is large

and the unit cell contains four molecules. So it is difficult to measure low

angle reflections correctly.

;


#==============================================================================
# PROCESSING SUMMARY (IUCr Office Use Only)

_journal_date_recd_electronic                      ?
_journal_date_from_coeditor                        ?
_journal_date_accepted                             ?
_journal_coeditor_code                             ?

#==============================================================================
# SUBMISSION DETAILS

_publ_contact_author_name                         'Masahiro Sadakane'
_publ_contact_author_email                        'sadakane09@hiroshima-u.ac.jp'
_publ_contact_author_fax                          'ENTER FAX NUMBER'
_publ_contact_author_phone                        'ENTER PHONE NUMBER'
_publ_contact_letter
;
    ENTER TEXT OF LETTER
;
_publ_requested_journal                           'ENTER JOURNAL NAME HERE'
_publ_requested_category
                                               'CHOOSE FI FM FO CI CM CO or AD'
_publ_requested_coeditor_name                      ?

#==============================================================================
# TITLE AND AUTHOR LIST

_publ_section_title
;
    ENTER SECTION TITLE
;
_publ_section_title_footnote
;
    ENTER FOOTNOTE TO TITLE OF PAPER
;
loop_
_publ_author_name
_publ_author_footnote
_publ_author_address
' FIRST AUTHORS NAME '
;
  FIRST AUTHORS FOOTNOTES
;
;
  FIRST AUTHORS ADDRESS
;
_publ_section_synopsis
;
    ENTER SYNOPSIS
;

#==============================================================================
# TEXT

_publ_section_abstract
;
    ENTER ABSTRACT
;
_publ_section_comment
;
    ENTER TEXT
;
_publ_section_references
;
    ENTER OTHER REFERENCES

    Rigaku (2015). CrystalStructure. Version 4.2. 
    Rigaku Corporation, Tokyo, Japan.

    Burla, M. C., Caliandro, R., Camalli, M., Carrozzini, B., 
    Cascarano, G. L., Giacovazzo, C., Mallamo, M., Mazzone, A., 
    Polidori, G. and Spagna, R. 
    (2012). J. Appl. Cryst. 45, 357-361.
    SIR2011

    Sheldrick, G.M. (2008) SHELXL Version 2013/4, Acta Cryst. A64, 112-122.

    Rigaku (1998). REQAB. 
    Rigaku Corporation, Tokyo, Japan.

;
_publ_section_figure_captions
;
    ENTER FIGURE CAPTIONS
;
_publ_section_exptl_prep
;
    ENTER COMPOUND PREPARATION DETAILS
;
_publ_section_exptl_refinement
;
    ENTER SPECIAL DETAILS OF THE REFINEMENT
;

#==============================================================================
data_248_6_55

#==============================================================================
# CHEMICAL DATA

_chemical_formula_sum                             'K11 O128 P5 W30'
_chemical_formula_moiety                          'K11 O128 P5 W30'
_chemical_formula_weight                           8148.37
_chemical_melting_point                            ?

#==============================================================================
# CRYSTAL DATA
_space_group_crystal_system                        orthorhombic
_space_group_name_H-M_alt                         'P n n a'
_space_group_name_Hall                            '-P 2a 2bc'
_space_group_IT_number                             52
loop_
_space_group_symop_id
_space_group_symop_operation_xyz
1   '+X,+Y,+Z'
2   '1/2-X,-Y,+Z'
3   '+X,1/2-Y,1/2-Z'
4   '1/2-X,1/2+Y,1/2-Z'
5   '-X,-Y,-Z'
6   '-1/2+X,+Y,-Z'
7   '-X,-1/2+Y,-1/2+Z'
8   '-1/2+X,-1/2-Y,-1/2+Z'
#------------------------------------------------------------------------------
_cell_length_a                                     32.843(6)
_cell_length_b                                     21.455(4)
_cell_length_c                                     19.126(4)
_cell_angle_alpha                                  90.0000
_cell_angle_beta                                   90.0000
_cell_angle_gamma                                  90.0000
_cell_volume                                       13477(5)
_cell_formula_units_Z                              4
_cell_measurement_reflns_used                      20876
_cell_measurement_theta_min                        3.00
_cell_measurement_theta_max                        27.50
_cell_measurement_temperature                      100
#------------------------------------------------------------------------------
_exptl_crystal_description                         prism
_exptl_crystal_colour                              colorless
_exptl_crystal_size_max                            0.100
_exptl_crystal_size_mid                            0.060
_exptl_crystal_size_min                            0.040
_exptl_crystal_density_diffrn                      4.016
_exptl_crystal_density_meas                        ?
_exptl_crystal_density_method                     'not measured'
_exptl_crystal_F_000                               14112.00
_exptl_absorpt_coefficient_mu                      26.023
_exptl_absorpt_correction_type                     multi-scan
_exptl_absorpt_process_details                    'REQAB (Rigaku, 1998)'
_exptl_absorpt_correction_T_min                    0.260
_exptl_absorpt_correction_T_max                    0.353

#==============================================================================
# EXPERIMENTAL DATA

_diffrn_ambient_temperature                        100
_diffrn_radiation_type                            'Mo K\a'
_diffrn_radiation_wavelength                       0.71075
_diffrn_measurement_device_type                   'Rigaku Saturn724'
_diffrn_measurement_method                         \w
_diffrn_detector_area_resol_mean                   7.111
_diffrn_reflns_number                              127540
_diffrn_reflns_av_R_equivalents                    0.1291
_diffrn_reflns_theta_max                           27.487
_diffrn_reflns_theta_min                           3.041
_diffrn_reflns_theta_full                          25.242
_diffrn_measured_fraction_theta_max                0.997
_diffrn_measured_fraction_theta_full               0.997
_diffrn_reflns_Laue_measured_fraction_max          0.997
_diffrn_reflns_Laue_measured_fraction_full         0.997
_diffrn_reflns_point_group_measured_fraction_max   0.997
_diffrn_reflns_point_group_measured_fraction_full  0.997
_diffrn_reflns_limit_h_min                        -42
_diffrn_reflns_limit_h_max                         42
_diffrn_reflns_limit_k_min                        -27
_diffrn_reflns_limit_k_max                         27
_diffrn_reflns_limit_l_min                        -24
_diffrn_reflns_limit_l_max                         24
_diffrn_standards_number                           0
_diffrn_standards_interval_count                   .
_diffrn_standards_decay_%                          ?
_reflns_number_total                               15430
_reflns_number_gt                                  14102
_reflns_threshold_expression                       F^2^>2.0\s(F^2^)
_reflns_Friedel_coverage          0.000
_reflns_Friedel_fraction_max      .
_reflns_Friedel_fraction_full     .

#==============================================================================
# REFINEMENT DATA

_refine_special_details
;
    Refinement was performed using all reflections. The weighted 
    R-factor (wR) and goodness of fit (S) are based on F^2^.
    R-factor (gt) are based on F. The threshold expression of
    F^2^ > 2.0 sigma(F^2^) is used only for calculating R-factor (gt).
;
_refine_ls_structure_factor_coef                   Fsqd
_refine_ls_R_factor_all                            0.1138
_refine_ls_R_factor_gt                             0.1038
_refine_ls_wR_factor_ref                           0.2224
_refine_ls_wR_factor_gt                            0.2165
_refine_ls_number_restraints                       6
_refine_ls_number_reflns                           15430
_refine_ls_number_parameters                       461
_refine_ls_goodness_of_fit_ref                     1.218
_refine_ls_weighting_scheme                        calc
_refine_ls_weighting_details
        'w = 1/[\s^2^(Fo^2^)+(0.0522P)^2^+2525.7449P] where P=(Fo^2^+2Fc^2^)/3'
_atom_sites_solution_primary                       direct
_atom_sites_solution_secondary                     difmap
_refine_ls_shift/su_max                            0.001
_refine_diff_density_max                           4.75
_refine_diff_density_min                          -4.15
_refine_ls_extinction_method                       none
_refine_ls_extinction_coef                         ?

loop_
_atom_type_symbol
_atom_type_description
_atom_type_scat_dispersion_real
_atom_type_scat_dispersion_imag
_atom_type_scat_source
  'K' 'K'  0.2009 0.2494 
;
International Tables for Crystallography
(Vol. C, Tables 4.2.6.8 and 6.1.1.4)
;
  'O' 'O'  0.0106 0.0060 
;
International Tables for Crystallography
(Vol. C, Tables 4.2.6.8 and 6.1.1.4)
;
  'P' 'P'  0.1023 0.0942 
;
International Tables for Crystallography
(Vol. C, Tables 4.2.6.8 and 6.1.1.4)
;
  'W' 'W'  -0.8490 6.8722 
;
International Tables for Crystallography
(Vol. C, Tables 4.2.6.8 and 6.1.1.4)
;

#==============================================================================
# ATOMIC COORDINATES AND THERMAL PARAMETERS

loop_
 _atom_site_label
 _atom_site_type_symbol
 _atom_site_fract_x
 _atom_site_fract_y
 _atom_site_fract_z
 _atom_site_U_iso_or_equiv
 _atom_site_adp_type
 _atom_site_occupancy
 _atom_site_site_symmetry_order  
 _atom_site_calc_flag
 _atom_site_refinement_flags_posn
 _atom_site_refinement_flags_adp
 _atom_site_refinement_flags_occupancy
 _atom_site_disorder_assembly
 _atom_site_disorder_group
W1 W 0.48179(3) 0.09294(5) 0.24845(6) 0.0086(2) Uani 1 1 d . . . . .
W2 W 0.54771(3) 0.09359(5) 0.40935(6) 0.0095(2) Uani 1 1 d . . . . .
W3 W 0.65613(3) 0.09277(5) 0.35196(6) 0.0110(2) Uani 1 1 d . . . . .
W4 W 0.65968(3) 0.09314(5) 0.15651(6) 0.0116(2) Uani 1 1 d . . . . .
W5 W 0.55166(3) 0.09239(5) 0.09200(6) 0.0099(2) Uani 1 1 d . . . . .
W6 W 0.40424(3) 0.17355(5) 0.35752(6) 0.0095(2) Uani 1 1 d . . . . .
W7 W 0.47337(3) 0.17559(5) 0.51705(6) 0.0097(2) Uani 1 1 d . . . . .
W8 W 0.58458(3) 0.17320(5) 0.56906(6) 0.0109(2) Uani 1 1 d . . . . .
W9 W 0.69455(3) 0.17554(5) 0.50558(6) 0.0120(2) Uani 1 1 d . . . . .
W10 W 0.75658(3) 0.17188(5) 0.33888(6) 0.0131(2) Uani 1 1 d . . . . .
W11 W 0.75685(3) 0.17481(5) 0.14004(6) 0.0130(2) Uani 1 1 d . . . . .
W12 W 0.68419(3) 0.17035(5) -0.01202(6) 0.0120(2) Uani 1 1 d . . . . .
W13 W 0.57400(3) 0.17219(5) -0.07139(6) 0.0104(2) Uani 1 1 d . . . . .
W14 W 0.46671(3) 0.17164(5) -0.00043(6) 0.0097(2) Uani 1 1 d . . . . .
W15 W 0.39839(3) 0.17313(5) 0.16099(6) 0.0095(2) Uani 1 1 d . . . . .
K1 K 0.57927(19) 0.1737(3) 0.2505(4) 0.0176(13) Uani 1 1 d . . . . .
K11 K 0.4991(2) 0.0662(3) 0.6532(4) 0.0200(14) Uani 1 1 d . . . . .
K12 K 0.50031(19) -0.0656(3) 0.1504(3) 0.0165(13) Uani 1 1 d . . . . .
K13 K 0.6137(2) 0.0043(3) 0.6749(4) 0.0221(14) Uani 1 1 d . . . . .
K14 K 0.7500 0.0000 0.3715(6) 0.0195(19) Uani 1 2 d S T P . .
K15 K 0.3743(2) 0.0868(3) -0.1198(5) 0.0309(18) Uani 1 1 d . . . . .
P1 P 0.4729(3) 0.2500 0.2500 0.0070(17) Uani 1 2 d S TU P . .
P2 P 0.5464(2) 0.2509(3) 0.4237(4) 0.0088(13) Uani 1 1 d . . . . .
P3 P 0.6651(2) 0.2496(3) 0.3582(4) 0.0099(13) Uani 1 1 d . . . . .
O1 O 0.4684(6) 0.0150(8) 0.2504(10) 0.010(4) Uiso 1 1 d . . . . .
O2 O 0.5441(6) 0.0147(9) 0.4315(10) 0.011(4) Uiso 1 1 d . . . . .
O3 O 0.6664(6) 0.0158(8) 0.3641(10) 0.010(4) Uiso 1 1 d . . . . .
O4 O 0.6712(6) 0.0165(9) 0.1432(11) 0.016(4) Uiso 1 1 d . . . . .
O5 O 0.5455(6) 0.0146(10) 0.0693(11) 0.019(5) Uiso 1 1 d . . . . .
O6 O 0.3674(7) 0.1213(10) 0.3780(12) 0.021(5) Uiso 1 1 d . . . . .
O7 O 0.4450(6) 0.1238(9) 0.5674(10) 0.012(4) Uiso 1 1 d . . . . .
O8 O 0.5829(6) 0.1231(9) 0.6375(11) 0.016(4) Uiso 1 1 d . . . . .
O9 O 0.7146(6) 0.1259(9) 0.5689(10) 0.014(4) Uiso 1 1 d . . . . .
O10 O 0.7944(7) 0.1202(10) 0.3633(12) 0.021(5) Uiso 1 1 d . . . . .
O11 O 0.7955(6) 0.1253(9) 0.1285(11) 0.015(4) Uiso 1 1 d . . . . .
O12 O 0.7083(7) 0.1217(10) -0.0692(12) 0.020 Uiso 1 1 d . U . . .
O13 O 0.5789(6) 0.1205(9) -0.1400(11) 0.013(4) Uiso 1 1 d . . . . .
O14 O 0.4440(6) 0.1204(9) -0.0568(10) 0.013(4) Uiso 1 1 d . . . . .
O15 O 0.3639(6) 0.1227(9) 0.1307(11) 0.015(4) Uiso 1 1 d . . . . .
O101 O 0.5237(6) 0.0895(8) 0.3205(10) 0.009(4) Uiso 1 1 d . . . . .
O102 O 0.5998(5) 0.0882(8) 0.3605(9) 0.008 Uiso 1 1 d . U . . .
O103 O 0.6485(6) 0.0885(9) 0.2502(11) 0.016(4) Uiso 1 1 d . . . . .
O104 O 0.6011(6) 0.0869(8) 0.1418(10) 0.010(4) Uiso 1 1 d . . . . .
O105 O 0.5243(5) 0.0889(8) 0.1805(9) 0.005(3) Uiso 1 1 d . . . . .
O111 O 0.4418(6) 0.1166(9) 0.1801(11) 0.017(4) Uiso 1 1 d . . . . .
O112 O 0.4415(5) 0.1197(8) 0.3167(9) 0.004(3) Uiso 1 1 d . . . . .
O113 O 0.4979(6) 0.1169(9) 0.4528(11) 0.013(4) Uiso 1 1 d . . . . .
O114 O 0.5759(6) 0.1164(8) 0.4928(10) 0.011(4) Uiso 1 1 d . . . . .
O115 O 0.6662(6) 0.1189(10) 0.4449(11) 0.017(4) Uiso 1 1 d . . . . .
O116 O 0.7118(6) 0.1191(9) 0.3340(11) 0.016(4) Uiso 1 1 d . . . . .
O117 O 0.7130(6) 0.1190(9) 0.1698(10) 0.010(4) Uiso 1 1 d . . . . .
O118 O 0.6646(6) 0.1168(9) 0.0597(10) 0.010(4) Uiso 1 1 d . . . . .
O119 O 0.5767(6) 0.1194(8) 0.0077(10) 0.010(4) Uiso 1 1 d . . . . .
O120 O 0.4995(6) 0.1191(9) 0.0481(11) 0.014(4) Uiso 1 1 d . . . . .
O121 O 0.4297(6) 0.1804(9) 0.4415(10) 0.013(4) Uiso 1 1 d . . . . .
O122 O 0.5199(6) 0.1777(9) 0.5694(10) 0.012(4) Uiso 1 1 d . . . . .
O123 O 0.6388(5) 0.1829(8) 0.5549(9) 0.004 Uiso 1 1 d . U . . .
O124 O 0.7368(5) 0.1757(8) 0.4429(9) 0.005(3) Uiso 1 1 d . . . . .
O125 O 0.7642(6) 0.1792(9) 0.2472(11) 0.017(4) Uiso 1 1 d . . . . .
O126 O 0.7346(6) 0.1773(9) 0.0546(11) 0.015(4) Uiso 1 1 d . . . . .
O127 O 0.6352(6) 0.1730(9) -0.0557(10) 0.011(4) Uiso 1 1 d . . . . .
O128 O 0.5188(5) 0.1729(8) -0.0644(9) 0.008 Uiso 1 1 d . U . . .
O129 O 0.4260(6) 0.1791(9) 0.0667(10) 0.012(4) Uiso 1 1 d . . . . .
O130 O 0.3862(6) 0.1774(8) 0.2515(10) 0.011(4) Uiso 1 1 d . . . . .
O201 O 0.7854(5) 0.2463(8) 0.3631(9) 0.007(3) Uiso 1 1 d . . . . .
O202 O 0.7056(6) 0.2545(9) 0.5490(11) 0.015(4) Uiso 1 1 d . . . . .
O203 O 0.5808(5) 0.2508(9) 0.6207(10) 0.010(4) Uiso 1 1 d . . . . .
O204 O 0.4515(5) 0.2538(8) 0.5518(9) 0.007(3) Uiso 1 1 d . . . . .
O205 O 0.3734(6) 0.2497(9) 0.3655(10) 0.011(4) Uiso 1 1 d . . . . .
O301 O 0.4438(6) 0.2512(10) 0.3157(11) 0.016(4) Uiso 1 1 d . . . . .
O302 O 0.4983(5) 0.3083(8) 0.2505(10) 0.009(4) Uiso 1 1 d . . . . .
O311 O 0.5539(6) 0.1923(9) 0.1166(10) 0.012(4) Uiso 1 1 d . . . . .
O312 O 0.5743(6) 0.2518(9) 0.4914(10) 0.012(4) Uiso 1 1 d . . . . .
O313 O 0.5011(5) 0.2512(8) 0.4513(9) 0.006(3) Uiso 1 1 d . . . . .
O314 O 0.5525(5) 0.1921(8) 0.3820(9) 0.007(4) Uiso 1 1 d . . . . .
O321 O 0.6661(6) 0.2480(9) 0.4401(10) 0.012(4) Uiso 1 1 d . . . . .
O322 O 0.6448(6) 0.1926(9) 0.3341(10) 0.011(4) Uiso 1 1 d . . . . .
O323 O 0.7111(6) 0.2490(9) 0.3349(11) 0.015(4) Uiso 1 1 d . . . . .
O324 O 0.6450(5) 0.3080(8) 0.3316(9) 0.007(4) Uiso 1 1 d . . . . .
O501 O 0.5541(7) -0.0110(11) 0.5791(12) 0.026(5) Uiso 1 1 d . . . . .
O502 O 0.6544(9) 0.0133(14) 0.5465(16) 0.045(7) Uiso 1 1 d . . . . .
O503 O 0.6743(13) 0.080(2) 0.691(2) 0.084(13) Uiso 1 1 d . . . . .
O504 O 0.6255(14) 0.012(2) 0.811(2) 0.089(13) Uiso 1 1 d . . . . .
O505 O 0.4881(7) 0.1535(10) 0.7518(12) 0.023(5) Uiso 1 1 d . . . . .
O506 O 0.3617(16) 0.024(2) -0.005(3) 0.107(16) Uiso 1 1 d . . . . .
O507 O 0.3581(15) 0.090(2) -0.258(3) 0.098(15) Uiso 1 1 d . . . . .
O508 O 0.5561(7) -0.0130(10) -0.0758(11) 0.020(5) Uiso 1 1 d . . . . .
O509 O 0.5664(7) -0.0314(11) 0.2435(13) 0.028(5) Uiso 1 1 d . . . . .

loop_
 _atom_site_aniso_label
 _atom_site_aniso_U_11
 _atom_site_aniso_U_22
 _atom_site_aniso_U_33
 _atom_site_aniso_U_23
 _atom_site_aniso_U_13
 _atom_site_aniso_U_12
W1 0.0102(5) 0.0066(5) 0.0091(5) -0.0003(4) 0.0003(4) -0.0004(4)
W2 0.0104(5) 0.0074(5) 0.0107(5) -0.0006(4) -0.0009(4) 0.0002(4)
W3 0.0104(5) 0.0091(5) 0.0136(5) -0.0017(4) -0.0013(4) 0.0013(4)
W4 0.0123(5) 0.0086(5) 0.0138(5) -0.0017(4) 0.0000(4) 0.0019(4)
W5 0.0113(5) 0.0071(5) 0.0114(5) -0.0008(4) 0.0010(4) 0.0002(4)
W6 0.0100(5) 0.0087(5) 0.0099(5) 0.0006(4) 0.0012(4) -0.0007(4)
W7 0.0108(5) 0.0085(5) 0.0098(5) 0.0000(4) 0.0001(4) -0.0001(4)
W8 0.0115(5) 0.0103(5) 0.0110(5) 0.0005(4) -0.0011(4) 0.0011(4)
W9 0.0113(5) 0.0115(5) 0.0133(5) 0.0010(4) -0.0017(4) 0.0003(4)
W10 0.0092(5) 0.0127(5) 0.0174(6) -0.0028(4) -0.0019(4) 0.0014(4)
W11 0.0082(5) 0.0138(5) 0.0169(6) -0.0016(4) 0.0009(4) 0.0012(4)
W12 0.0120(5) 0.0109(5) 0.0131(5) -0.0022(4) 0.0013(4) 0.0010(4)
W13 0.0122(5) 0.0084(5) 0.0106(5) -0.0012(4) 0.0007(4) -0.0003(4)
W14 0.0113(5) 0.0075(5) 0.0102(5) 0.0007(4) -0.0016(4) -0.0003(4)
W15 0.0096(5) 0.0090(5) 0.0099(5) 0.0000(4) -0.0013(4) -0.0011(4)
K1 0.015(3) 0.017(3) 0.021(3) -0.001(3) 0.000(2) 0.001(2)
K11 0.020(3) 0.016(3) 0.025(4) 0.004(3) -0.006(3) 0.002(2)
K12 0.017(3) 0.018(3) 0.014(3) -0.003(2) 0.004(2) -0.003(2)
K13 0.023(3) 0.017(3) 0.026(4) -0.004(3) -0.007(3) -0.001(3)
K14 0.013(4) 0.012(4) 0.034(6) 0.000 0.000 0.006(3)
K15 0.021(4) 0.018(3) 0.054(5) -0.008(3) -0.012(3) -0.003(3)
P1 0.0071(19) 0.0068(19) 0.0072(19) 0.0003(10) 0.000 0.000
P2 0.006(3) 0.008(3) 0.012(3) 0.002(3) -0.005(3) 0.002(2)
P3 0.010(3) 0.008(3) 0.012(3) -0.004(3) 0.002(3) 0.003(3)

#==============================================================================
_computing_data_collection
                                'CrystalClear-SM Expert 2.0 r16 (Rigaku, 2014)'
_computing_cell_refinement
                                               'CrystalClear-SM Expert 2.0 r16'
_computing_data_reduction
                                               'CrystalClear-SM Expert 2.0 r16'
_computing_structure_solution
                                                'SIR2011 (Burla, et al., 2012)'
_computing_structure_refinement
                                      'SHELXL Version 2013/4 (Sheldrick, 2008)'
_computing_publication_material
                                          'CrystalStructure 4.2 (Rigaku, 2015)'
_computing_molecular_graphics                     'CrystalStructure 4.2'

#==============================================================================
# MOLECULAR GEOMETRY

_geom_special_details
;
 All esds (except the esd in the dihedral angle between two l.s. planes)
 are estimated using the full covariance matrix.  The cell esds are taken
 into account individually in the estimation of esds in distances, angles
 and torsion angles; correlations between esds in cell parameters are only
 used when they are defined by crystal symmetry.  An approximate (isotropic)
 treatment of cell esds is used for estimating esds involving l.s. planes.
;

loop_
 _geom_bond_atom_site_label_1
 _geom_bond_atom_site_label_2
 _geom_bond_distance
 _geom_bond_site_symmetry_2
 _geom_bond_publ_flag
W1 O1 1.730(18) . ?
W1 O105 1.908(17) . ?
W1 O111 1.92(2) . ?
W1 O112 1.944(17) . ?
W1 O101 1.949(18) . ?
W1 O302 2.188(18) 3 ?
W1 K1 3.640(6) . ?
W1 K12 3.931(6) . ?
W1 K11 3.949(7) 5_656 ?
W1 K13 4.042(7) 5_656 ?
W2 O2 1.748(19) . ?
W2 O101 1.876(19) . ?
W2 O113 1.90(2) . ?
W2 O114 1.908(19) . ?
W2 O102 1.952(18) . ?
W2 O314 2.184(17) . ?
W2 K1 3.642(7) . ?
W2 K11 3.943(7) 5_656 ?
W3 O3 1.702(18) . ?
W3 O102 1.860(18) . ?
W3 O115 1.89(2) . ?
W3 O116 1.94(2) . ?
W3 O103 1.96(2) . ?
W3 O322 2.201(19) . ?
W3 K1 3.627(7) . ?
W3 K14 3.6885(16) . ?
W4 O4 1.71(2) . ?
W4 O103 1.83(2) . ?
W4 O117 1.853(19) . ?
W4 O118 1.927(19) . ?
W4 O104 1.948(18) . ?
W4 O324 2.187(17) 3 ?
W4 K1 3.632(6) . ?
W4 K15 4.079(7) 5_655 ?
W5 O5 1.73(2) . ?
W5 O104 1.887(19) . ?
W5 O119 1.901(19) . ?
W5 O105 1.919(17) . ?
W5 O120 1.99(2) . ?
W5 O311 2.196(19) . ?
W5 K1 3.613(7) . ?
W5 K12 3.947(7) . ?
W6 O6 1.70(2) . ?
W6 O121 1.82(2) . ?
W6 O112 1.856(17) . ?
W6 O205 1.930(19) . ?
W6 O130 2.115(19) . ?
W6 O301 2.26(2) . ?
W6 K13 3.910(7) 5_656 ?
W7 O7 1.740(19) . ?
W7 O122 1.828(19) . ?
W7 O113 1.94(2) . ?
W7 O204 1.944(18) . ?
W7 O121 2.04(2) . ?
W7 O313 2.245(18) . ?
W7 K11 3.605(7) . ?
W8 O8 1.69(2) . ?
W8 O123 1.813(17) . ?
W8 O114 1.922(19) . ?
W8 O203 1.940(19) . ?
W8 O122 2.126(19) . ?
W8 O312 2.273(19) . ?
W8 K11 3.968(7) . ?
W9 O9 1.74(2) . ?
W9 O124 1.834(17) . ?
W9 O115 1.92(2) . ?
W9 O202 1.92(2) . ?
W9 O123 2.066(17) . ?
W9 O321 2.204(19) . ?
W10 O10 1.73(2) . ?
W10 O125 1.78(2) . ?
W10 O116 1.86(2) . ?
W10 O201 1.912(18) . ?
W10 O124 2.094(17) . ?
W10 O323 2.23(2) . ?
W10 K14 3.746(2) . ?
W11 O11 1.67(2) . ?
W11 O126 1.79(2) . ?
W11 O201 1.936(18) 3 ?
W11 O117 1.959(19) . ?
W11 O125 2.07(2) . ?
W11 O323 2.27(2) 3 ?
W12 O12 1.71(2) . ?
W12 O127 1.813(19) . ?
W12 O202 1.90(2) 3 ?
W12 O118 1.902(19) . ?
W12 O126 2.10(2) . ?
W12 O321 2.30(2) 3 ?
W13 O13 1.73(2) . ?
W13 O128 1.817(18) . ?
W13 O119 1.892(19) . ?
W13 O203 1.916(19) 3 ?
W13 O127 2.034(19) . ?
W13 O312 2.236(19) 3 ?
W13 K12 3.671(6) 5_655 ?
W14 O14 1.71(2) . ?
W14 O120 1.81(2) . ?
W14 O129 1.860(19) . ?
W14 O204 1.943(18) 3 ?
W14 O128 2.104(18) . ?
W14 O313 2.215(18) 3 ?
W14 K12 3.819(6) 5_655 ?
W15 O15 1.67(2) . ?
W15 O130 1.779(19) . ?
W15 O111 1.91(2) . ?
W15 O205 1.916(19) 3 ?
W15 O129 2.023(19) . ?
W15 O301 2.25(2) 3 ?
K1 O302 2.689(19) 3 ?
K1 O314 2.695(19) . ?
K1 O324 2.698(19) 3 ?
K1 O322 2.71(2) . ?
K1 O311 2.72(2) . ?
K1 O102 2.872(19) . ?
K1 O104 2.88(2) . ?
K1 O105 2.892(18) . ?
K1 O101 2.896(19) . ?
K1 O103 2.92(2) . ?
K1 K1 3.275(12) 3 ?
K11 O505 2.68(2) . ?
K11 O7 2.71(2) . ?
K11 O1 2.75(2) 5_656 ?
K11 O2 2.77(2) 5_656 ?
K11 O501 2.83(2) . ?
K11 O122 2.96(2) . ?
K11 O509 3.01(3) 5_656 ?
K11 O8 3.03(2) . ?
K11 K12 3.756(9) 5_656 ?
K11 W2 3.943(7) 5_656 ?
K11 W1 3.949(7) 5_656 ?
K12 O505 2.68(2) 5_656 ?
K12 O5 2.75(2) . ?
K12 O1 2.78(2) . ?
K12 O14 2.82(2) 5_655 ?
K12 O13 2.86(2) 5_655 ?
K12 O508 2.88(2) 5_655 ?
K12 O128 2.899(19) 5_655 ?
K12 O509 2.90(3) . ?
K12 W13 3.671(6) 5_655 ?
K12 K11 3.756(9) 5_656 ?
K12 W14 3.819(6) 5_655 ?
K13 O503 2.58(5) . ?
K13 O504 2.64(5) . ?
K13 O501 2.70(2) . ?
K13 O502 2.80(3) . ?
K13 O8 2.83(2) . ?
K13 O6 2.94(2) 5_656 ?
K13 O1 3.08(2) 5_656 ?
K13 O112 3.223(18) 5_656 ?
K13 W6 3.910(7) 5_656 ?
K13 W1 4.042(7) 5_656 ?
K14 O3 2.770(18) 2_655 ?
K14 O3 2.770(18) . ?
K14 O116 2.94(2) . ?
K14 O116 2.94(2) 2_655 ?
K14 O10 2.97(2) 2_655 ?
K14 O10 2.97(2) . ?
K14 W3 3.6885(16) 2_655 ?
K14 W10 3.746(2) 2_655 ?
K15 O506 2.62(5) . ?
K15 O14 2.69(2) . ?
K15 O507 2.70(5) . ?
K15 O4 2.71(2) 5_655 ?
K15 O11 2.72(2) 6 ?
K15 O509 3.29(3) 5_655 ?
K15 W4 4.079(7) 5_655 ?
K15 K12 4.184(10) 5_655 ?
P1 O302 1.502(19) . ?
P1 O302 1.503(19) 3 ?
P1 O301 1.58(2) . ?
P1 O301 1.58(2) 3 ?
P1 K1 3.859(10) 3 ?
P2 O311 1.46(2) 3 ?
P2 O314 1.505(19) . ?
P2 O313 1.578(18) . ?
P2 O312 1.59(2) . ?
P2 K1 3.858(10) 3 ?
P3 O322 1.47(2) . ?
P3 O324 1.505(19) . ?
P3 O321 1.57(2) . ?
P3 O323 1.58(2) . ?
P3 K1 3.870(10) 3 ?
O1 K11 2.75(2) 5_656 ?
O1 K13 3.08(2) 5_656 ?
O2 K11 2.77(2) 5_656 ?
O4 K15 2.71(2) 5_655 ?
O6 K13 2.94(2) 5_656 ?
O11 K15 2.72(2) 6_655 ?
O13 K12 2.86(2) 5_655 ?
O14 K12 2.82(2) 5_655 ?
O112 K13 3.223(18) 5_656 ?
O128 K12 2.899(19) 5_655 ?
O201 W11 1.936(18) 3 ?
O202 W12 1.90(2) 3 ?
O203 W13 1.916(19) 3 ?
O204 W14 1.943(18) 3 ?
O205 W15 1.916(19) 3 ?
O301 W15 2.25(2) 3 ?
O302 W1 2.188(18) 3 ?
O302 K1 2.689(19) 3 ?
O311 P2 1.46(2) 3 ?
O312 W13 2.236(19) 3 ?
O313 W14 2.214(18) 3 ?
O321 W12 2.30(2) 3 ?
O323 W11 2.27(2) 3 ?
O324 W4 2.187(17) 3 ?
O324 K1 2.698(19) 3 ?
O505 K12 2.68(2) 5_656 ?
O508 K12 2.88(2) 5_655 ?
O509 K11 3.01(3) 5_656 ?
O509 K15 3.29(3) 5_655 ?

loop_
 _geom_angle_atom_site_label_1
 _geom_angle_atom_site_label_2
 _geom_angle_atom_site_label_3
 _geom_angle
 _geom_angle_site_symmetry_1
 _geom_angle_site_symmetry_3
 _geom_angle_publ_flag
O1 W1 O105 99.1(8) . . ?
O1 W1 O111 95.5(9) . . ?
O105 W1 O111 92.8(8) . . ?
O1 W1 O112 95.5(8) . . ?
O105 W1 O112 165.4(7) . . ?
O111 W1 O112 85.0(8) . . ?
O1 W1 O101 97.4(8) . . ?
O105 W1 O101 87.9(7) . . ?
O111 W1 O101 166.8(8) . . ?
O112 W1 O101 91.0(7) . . ?
O1 W1 O302 178.2(8) . 3 ?
O105 W1 O302 82.5(7) . 3 ?
O111 W1 O302 85.4(8) . 3 ?
O112 W1 O302 82.9(7) . 3 ?
O101 W1 O302 81.7(7) . 3 ?
O1 W1 K1 133.2(6) . . ?
O105 W1 K1 52.1(5) . . ?
O111 W1 K1 118.9(6) . . ?
O112 W1 K1 116.8(5) . . ?
O101 W1 K1 52.4(5) . . ?
O302 W1 K1 47.3(5) 3 . ?
O1 W1 K12 38.2(6) . . ?
O105 W1 K12 61.5(5) . . ?
O111 W1 K12 90.6(6) . . ?
O112 W1 K12 132.9(5) . . ?
O101 W1 K12 101.3(5) . . ?
O302 W1 K12 143.5(5) 3 . ?
K1 W1 K12 106.30(14) . . ?
O1 W1 K11 36.3(6) . 5_656 ?
O105 W1 K11 99.7(5) . 5_656 ?
O111 W1 K11 131.4(6) . 5_656 ?
O112 W1 K11 92.5(5) . 5_656 ?
O101 W1 K11 61.2(5) . 5_656 ?
O302 W1 K11 142.6(5) 3 5_656 ?
K1 W1 K11 105.46(14) . 5_656 ?
K12 W1 K11 56.94(14) . 5_656 ?
O1 W1 K13 45.2(6) . 5_656 ?
O105 W1 K13 142.2(5) . 5_656 ?
O111 W1 K13 81.5(6) . 5_656 ?
O112 W1 K13 51.7(5) . 5_656 ?
O101 W1 K13 105.8(5) . 5_656 ?
O302 W1 K13 133.5(5) 3 5_656 ?
K1 W1 K13 157.53(15) . 5_656 ?
K12 W1 K13 81.17(14) . 5_656 ?
K11 W1 K13 60.28(14) 5_656 5_656 ?
O2 W2 O101 98.4(8) . . ?
O2 W2 O113 95.1(9) . . ?
O101 W2 O113 92.6(8) . . ?
O2 W2 O114 94.5(8) . . ?
O101 W2 O114 166.7(8) . . ?
O113 W2 O114 89.1(8) . . ?
O2 W2 O102 96.8(8) . . ?
O101 W2 O102 86.1(8) . . ?
O113 W2 O102 168.0(8) . . ?
O114 W2 O102 89.4(8) . . ?
O2 W2 O314 179.7(9) . . ?
O101 W2 O314 81.9(7) . . ?
O113 W2 O314 85.0(8) . . ?
O114 W2 O314 85.2(7) . . ?
O102 W2 O314 83.1(7) . . ?
O2 W2 K1 132.7(6) . . ?
O101 W2 K1 52.1(6) . . ?
O113 W2 K1 119.0(6) . . ?
O114 W2 K1 116.0(6) . . ?
O102 W2 K1 51.6(5) . . ?
O314 W2 K1 47.4(5) . . ?
O2 W2 K11 37.4(6) . 5_656 ?
O101 W2 K11 61.4(6) . 5_656 ?
O113 W2 K11 91.5(6) . 5_656 ?
O114 W2 K11 131.7(6) . 5_656 ?
O102 W2 K11 98.3(5) . 5_656 ?
O314 W2 K11 142.9(5) . 5_656 ?
K1 W2 K11 105.55(15) . 5_656 ?
O3 W3 O102 97.7(8) . . ?
O3 W3 O115 97.1(9) . . ?
O102 W3 O115 96.1(8) . . ?
O3 W3 O116 96.9(9) . . ?
O102 W3 O116 165.1(8) . . ?
O115 W3 O116 85.1(9) . . ?
O3 W3 O103 96.6(9) . . ?
O102 W3 O103 87.6(8) . . ?
O115 W3 O103 165.1(9) . . ?
O116 W3 O103 87.6(9) . . ?
O3 W3 O322 178.0(8) . . ?
O102 W3 O322 84.0(7) . . ?
O115 W3 O322 83.5(8) . . ?
O116 W3 O322 81.3(8) . . ?
O103 W3 O322 82.5(8) . . ?
O3 W3 K1 132.5(6) . . ?
O102 W3 K1 51.7(6) . . ?
O115 W3 K1 118.9(6) . . ?
O116 W3 K1 114.9(6) . . ?
O103 W3 K1 53.4(6) . . ?
O322 W3 K1 48.2(5) . . ?
O3 W3 K14 45.3(6) . . ?
O102 W3 K14 142.6(5) . . ?
O115 W3 K14 85.3(6) . . ?
O116 W3 K14 52.3(6) . . ?
O103 W3 K14 100.4(6) . . ?
O322 W3 K14 133.0(5) . . ?
K1 W3 K14 153.4(2) . . ?
O4 W4 O103 97.9(9) . . ?
O4 W4 O117 95.7(9) . . ?
O103 W4 O117 94.1(9) . . ?
O4 W4 O118 95.3(9) . . ?
O103 W4 O118 166.2(8) . . ?
O117 W4 O118 88.5(8) . . ?
O4 W4 O104 97.5(9) . . ?
O103 W4 O104 86.6(8) . . ?
O117 W4 O104 166.6(8) . . ?
O118 W4 O104 87.8(8) . . ?
O4 W4 O324 177.4(8) . 3 ?
O103 W4 O324 84.6(8) . 3 ?
O117 W4 O324 84.5(7) . 3 ?
O118 W4 O324 82.1(7) . 3 ?
O104 W4 O324 82.2(7) . 3 ?
O4 W4 K1 133.9(7) . . ?
O103 W4 K1 52.9(6) . . ?
O117 W4 K1 118.5(6) . . ?
O118 W4 K1 114.3(6) . . ?
O104 W4 K1 52.2(6) . . ?
O324 W4 K1 47.7(5) 3 . ?
O4 W4 K15 28.7(7) . 5_655 ?
O103 W4 K15 93.6(6) . 5_655 ?
O117 W4 K15 124.4(6) . 5_655 ?
O118 W4 K15 96.1(6) . 5_655 ?
O104 W4 K15 68.9(5) . 5_655 ?
O324 W4 K15 151.1(5) 3 5_655 ?
K1 W4 K15 109.66(16) . 5_655 ?
O5 W5 O104 99.5(9) . . ?
O5 W5 O119 97.5(9) . . ?
O104 W5 O119 94.3(8) . . ?
O5 W5 O105 97.4(9) . . ?
O104 W5 O105 87.5(8) . . ?
O119 W5 O105 164.5(7) . . ?
O5 W5 O120 94.1(9) . . ?
O104 W5 O120 166.2(8) . . ?
O119 W5 O120 85.8(8) . . ?
O105 W5 O120 88.9(8) . . ?
O5 W5 O311 174.8(9) . . ?
O104 W5 O311 85.6(7) . . ?
O119 W5 O311 82.5(8) . . ?
O105 W5 O311 82.2(7) . . ?
O120 W5 O311 80.7(8) . . ?
O5 W5 K1 134.6(7) . . ?
O104 W5 K1 52.5(6) . . ?
O119 W5 K1 117.1(6) . . ?
O105 W5 K1 52.9(5) . . ?
O120 W5 K1 115.5(6) . . ?
O311 W5 K1 48.7(5) . . ?
O5 W5 K12 36.5(7) . . ?
O104 W5 K12 99.9(6) . . ?
O119 W5 K12 133.4(6) . . ?
O105 W5 K12 61.1(5) . . ?
O120 W5 K12 89.9(6) . . ?
O311 W5 K12 142.4(5) . . ?
K1 W5 K12 106.52(14) . . ?
O6 W6 O121 100.3(10) . . ?
O6 W6 O112 99.0(9) . . ?
O121 W6 O112 96.8(8) . . ?
O6 W6 O205 99.6(9) . . ?
O121 W6 O205 95.9(8) . . ?
O112 W6 O205 155.2(8) . . ?
O6 W6 O130 92.7(9) . . ?
O121 W6 O130 166.8(8) . . ?
O112 W6 O130 78.8(7) . . ?
O205 W6 O130 84.0(8) . . ?
O6 W6 O301 168.5(9) . . ?
O121 W6 O301 89.3(8) . . ?
O112 W6 O301 86.1(7) . . ?
O205 W6 O301 72.9(8) . . ?
O130 W6 O301 78.0(7) . . ?
O6 W6 K13 44.2(7) . 5_656 ?
O121 W6 K13 106.8(6) . 5_656 ?
O112 W6 K13 54.9(5) . 5_656 ?
O205 W6 K13 139.5(6) . 5_656 ?
O130 W6 K13 81.0(5) . 5_656 ?
O301 W6 K13 138.6(5) . 5_656 ?
O7 W7 O122 99.2(9) . . ?
O7 W7 O113 99.1(9) . . ?
O122 W7 O113 90.9(8) . . ?
O7 W7 O204 99.4(8) . . ?
O122 W7 O204 95.8(8) . . ?
O113 W7 O204 159.0(8) . . ?
O7 W7 O121 92.8(8) . . ?
O122 W7 O121 167.2(8) . . ?
O113 W7 O121 82.8(8) . . ?
O204 W7 O121 86.5(8) . . ?
O7 W7 O313 171.2(8) . . ?
O122 W7 O313 87.1(8) . . ?
O113 W7 O313 86.9(7) . . ?
O204 W7 O313 73.6(7) . . ?
O121 W7 O313 81.5(7) . . ?
O7 W7 K11 46.4(7) . . ?
O122 W7 K11 54.9(6) . . ?
O113 W7 K11 86.4(6) . . ?
O204 W7 K11 113.7(5) . . ?
O121 W7 K11 135.2(6) . . ?
O313 W7 K11 141.2(5) . . ?
O8 W8 O123 102.7(9) . . ?
O8 W8 O114 100.3(9) . . ?
O123 W8 O114 96.0(8) . . ?
O8 W8 O203 98.6(9) . . ?
O123 W8 O203 92.4(8) . . ?
O114 W8 O203 157.1(8) . . ?
O8 W8 O122 89.7(9) . . ?
O123 W8 O122 167.5(7) . . ?
O114 W8 O122 83.3(8) . . ?
O203 W8 O122 84.0(7) . . ?
O8 W8 O312 166.1(8) . . ?
O123 W8 O312 87.9(7) . . ?
O114 W8 O312 87.3(7) . . ?
O203 W8 O312 71.7(7) . . ?
O122 W8 O312 79.6(7) . . ?
O8 W8 K11 45.3(7) . . ?
O123 W8 K11 145.3(5) . . ?
O114 W8 K11 80.6(6) . . ?
O203 W8 K11 104.1(6) . . ?
O122 W8 K11 47.0(5) . . ?
O312 W8 K11 126.1(5) . . ?
O9 W9 O124 99.8(8) . . ?
O9 W9 O115 102.5(9) . . ?
O124 W9 O115 88.4(8) . . ?
O9 W9 O202 99.6(9) . . ?
O124 W9 O202 97.9(8) . . ?
O115 W9 O202 155.6(9) . . ?
O9 W9 O123 93.7(8) . . ?
O124 W9 O123 165.7(7) . . ?
O115 W9 O123 83.9(8) . . ?
O202 W9 O123 84.5(8) . . ?
O9 W9 O321 170.6(8) . . ?
O124 W9 O321 87.0(7) . . ?
O115 W9 O321 84.1(8) . . ?
O202 W9 O321 72.8(8) . . ?
O123 W9 O321 80.2(7) . . ?
O10 W10 O125 102.8(10) . . ?
O10 W10 O116 101.0(10) . . ?
O125 W10 O116 96.7(9) . . ?
O10 W10 O201 96.6(9) . . ?
O125 W10 O201 95.5(8) . . ?
O116 W10 O201 155.8(8) . . ?
O10 W10 O124 89.5(9) . . ?
O125 W10 O124 167.6(8) . . ?
O116 W10 O124 80.0(8) . . ?
O201 W10 O124 83.7(7) . . ?
O10 W10 O323 165.0(9) . . ?
O125 W10 O323 89.7(8) . . ?
O116 W10 O323 85.4(8) . . ?
O201 W10 O323 73.7(7) . . ?
O124 W10 O323 78.2(7) . . ?
O10 W10 K14 50.6(7) . . ?
O125 W10 K14 105.0(7) . . ?
O116 W10 K14 50.4(6) . . ?
O201 W10 K14 144.1(5) . . ?
O124 W10 K14 82.1(5) . . ?
O323 W10 K14 134.2(5) . . ?
O11 W11 O126 102.0(10) . . ?
O11 W11 O201 100.6(9) . 3 ?
O126 W11 O201 98.2(8) . 3 ?
O11 W11 O117 102.1(9) . . ?
O126 W11 O117 89.0(9) . . ?
O201 W11 O117 154.1(8) 3 . ?
O11 W11 O125 94.1(9) . . ?
O126 W11 O125 162.2(9) . . ?
O201 W11 O125 86.2(8) 3 . ?
O117 W11 O125 80.0(8) . . ?
O11 W11 O323 171.3(9) . 3 ?
O126 W11 O323 84.4(8) . 3 ?
O201 W11 O323 72.3(7) 3 3 ?
O117 W11 O323 83.8(7) . 3 ?
O125 W11 O323 80.5(8) . 3 ?
O12 W12 O127 97.8(10) . . ?
O12 W12 O202 96.3(10) . 3 ?
O127 W12 O202 97.5(9) . 3 ?
O12 W12 O118 104.5(9) . . ?
O127 W12 O118 92.9(8) . . ?
O202 W12 O118 155.3(8) 3 . ?
O12 W12 O126 93.8(9) . . ?
O127 W12 O126 168.3(8) . . ?
O202 W12 O126 82.7(8) 3 . ?
O118 W12 O126 82.6(8) . . ?
O12 W12 O321 165.2(9) . 3 ?
O127 W12 O321 91.3(8) . 3 ?
O202 W12 O321 70.8(8) 3 3 ?
O118 W12 O321 86.7(7) . 3 ?
O126 W12 O321 77.7(7) . 3 ?
O13 W13 O128 98.9(9) . . ?
O13 W13 O119 102.6(9) . . ?
O128 W13 O119 89.6(8) . . ?
O13 W13 O203 99.7(9) . 3 ?
O128 W13 O203 98.3(8) . 3 ?
O119 W13 O203 154.8(8) . 3 ?
O13 W13 O127 91.4(8) . . ?
O128 W13 O127 167.3(8) . . ?
O119 W13 O127 80.8(8) . . ?
O203 W13 O127 87.2(8) 3 . ?
O13 W13 O312 171.3(8) . 3 ?
O128 W13 O312 87.0(7) . 3 ?
O119 W13 O312 83.7(7) . 3 ?
O203 W13 O312 73.0(7) 3 3 ?
O127 W13 O312 83.6(7) . 3 ?
O13 W13 K12 49.4(7) . 5_655 ?
O128 W13 K12 51.1(6) . 5_655 ?
O119 W13 K12 89.3(6) . 5_655 ?
O203 W13 K12 114.3(6) 3 5_655 ?
O127 W13 K12 136.4(5) . 5_655 ?
O312 W13 K12 137.7(5) 3 5_655 ?
O14 W14 O120 100.5(9) . . ?
O14 W14 O129 100.2(9) . . ?
O120 W14 O129 97.3(9) . . ?
O14 W14 O204 95.6(9) . 3 ?
O120 W14 O204 157.4(8) . 3 ?
O129 W14 O204 95.4(8) . 3 ?
O14 W14 O128 89.8(8) . . ?
O120 W14 O128 79.8(8) . . ?
O129 W14 O128 170.0(8) . . ?
O204 W14 O128 84.5(7) 3 . ?
O14 W14 O313 166.0(8) . 3 ?
O120 W14 O313 86.8(8) . 3 ?
O129 W14 O313 90.5(7) . 3 ?
O204 W14 O313 74.4(7) 3 3 ?
O128 W14 O313 79.8(7) . 3 ?
O14 W14 K12 42.9(7) . 5_655 ?
O120 W14 K12 81.1(6) . 5_655 ?
O129 W14 K12 140.7(6) . 5_655 ?
O204 W14 K12 100.6(5) 3 5_655 ?
O128 W14 K12 48.7(5) . 5_655 ?
O313 W14 K12 128.3(5) 3 5_655 ?
O15 W15 O130 102.6(9) . . ?
O15 W15 O111 99.3(9) . . ?
O130 W15 O111 90.8(9) . . ?
O15 W15 O205 100.2(9) . 3 ?
O130 W15 O205 96.7(8) . 3 ?
O111 W15 O205 157.0(8) . 3 ?
O15 W15 O129 92.1(9) . . ?
O130 W15 O129 164.8(8) . . ?
O111 W15 O129 82.9(8) . . ?
O205 W15 O129 84.4(8) 3 . ?
O15 W15 O301 170.4(9) . 3 ?
O130 W15 O301 85.4(8) . 3 ?
O111 W15 O301 85.8(8) . 3 ?
O205 W15 O301 73.3(8) 3 3 ?
O129 W15 O301 80.4(8) . 3 ?
O302 K1 O314 70.3(6) 3 . ?
O302 K1 O324 140.1(6) 3 3 ?
O314 K1 O324 141.5(6) . 3 ?
O302 K1 O322 140.1(6) 3 . ?
O314 K1 O322 71.7(6) . . ?
O324 K1 O322 71.7(6) 3 . ?
O302 K1 O311 70.7(6) 3 . ?
O314 K1 O311 139.2(6) . . ?
O324 K1 O311 71.1(6) 3 . ?
O322 K1 O311 140.9(6) . . ?
O302 K1 O102 109.2(6) 3 . ?
O314 K1 O102 59.1(5) . . ?
O324 K1 O102 109.4(6) 3 . ?
O322 K1 O102 58.5(5) . . ?
O311 K1 O102 148.8(6) . . ?
O302 K1 O104 109.5(6) 3 . ?
O314 K1 O104 148.2(6) . . ?
O324 K1 O104 58.4(5) 3 . ?
O322 K1 O104 108.9(6) . . ?
O311 K1 O104 59.5(6) . . ?
O102 K1 O104 93.3(5) . . ?
O302 K1 O105 57.9(5) 3 . ?
O314 K1 O105 108.7(5) . . ?
O324 K1 O105 108.8(6) 3 . ?
O322 K1 O105 149.6(6) . . ?
O311 K1 O105 57.7(5) . . ?
O102 K1 O105 94.8(5) . . ?
O104 K1 O105 54.2(5) . . ?
O302 K1 O101 57.9(5) 3 . ?
O314 K1 O101 56.9(5) . . ?
O324 K1 O101 149.8(6) 3 . ?
O322 K1 O101 108.7(6) . . ?
O311 K1 O101 109.5(6) . . ?
O102 K1 O101 53.9(5) . . ?
O104 K1 O101 95.0(5) . . ?
O105 K1 O101 55.1(5) . . ?
O302 K1 O103 149.5(6) 3 . ?
O314 K1 O103 110.4(6) . . ?
O324 K1 O103 57.7(6) 3 . ?
O322 K1 O103 58.4(6) . . ?
O311 K1 O103 109.2(6) . . ?
O102 K1 O103 54.5(6) . . ?
O104 K1 O103 53.1(6) . . ?
O105 K1 O103 95.3(6) . . ?
O101 K1 O103 95.9(6) . . ?
O302 K1 K1 81.7(4) 3 3 ?
O314 K1 K1 81.9(4) . 3 ?
O324 K1 K1 81.4(4) 3 3 ?
O322 K1 K1 81.6(4) . 3 ?
O311 K1 K1 81.3(5) . 3 ?
O102 K1 K1 130.0(5) . 3 ?
O104 K1 K1 130.0(5) . 3 ?
O105 K1 K1 128.8(4) . 3 ?
O101 K1 K1 128.8(4) . 3 ?
O103 K1 K1 128.8(4) . 3 ?
O302 K1 W5 79.4(4) 3 . ?
O314 K1 W5 140.6(4) . . ?
O324 K1 W5 77.5(4) 3 . ?
O322 K1 W5 140.0(5) . . ?
O311 K1 W5 37.3(4) . . ?
O102 K1 W5 111.5(4) . . ?
O104 K1 W5 31.3(4) . . ?
O105 K1 W5 31.9(3) . . ?
O101 K1 W5 85.9(4) . . ?
O103 K1 W5 83.8(4) . . ?
K1 K1 W5 118.6(3) 3 . ?
O505 K11 O7 91.1(7) . . ?
O505 K11 O1 91.3(7) . 5_656 ?
O7 K11 O1 161.2(6) . 5_656 ?
O505 K11 O2 141.4(7) . 5_656 ?
O7 K11 O2 66.2(6) . 5_656 ?
O1 K11 O2 101.2(6) 5_656 5_656 ?
O505 K11 O501 147.8(7) . . ?
O7 K11 O501 112.4(7) . . ?
O1 K11 O501 73.5(6) 5_656 . ?
O2 K11 O501 70.5(6) 5_656 . ?
O505 K11 O122 81.2(6) . . ?
O7 K11 O122 57.0(6) . . ?
O1 K11 O122 141.7(6) 5_656 . ?
O2 K11 O122 108.0(6) 5_656 . ?
O501 K11 O122 93.1(6) . . ?
O505 K11 O509 67.5(7) . 5_656 ?
O7 K11 O509 92.4(7) . 5_656 ?
O1 K11 O509 71.4(6) 5_656 5_656 ?
O2 K11 O509 82.1(6) 5_656 5_656 ?
O501 K11 O509 129.7(7) . 5_656 ?
O122 K11 O509 136.1(6) . 5_656 ?
O505 K11 O8 84.8(6) . . ?
O7 K11 O8 110.6(6) . . ?
O1 K11 O8 88.2(6) 5_656 . ?
O2 K11 O8 131.4(6) 5_656 . ?
O501 K11 O8 66.8(6) . . ?
O122 K11 O8 53.9(6) . . ?
O509 K11 O8 144.5(7) 5_656 . ?
O505 K11 W7 91.3(5) . . ?
O7 K11 W7 27.6(4) . . ?
O1 K11 W7 170.6(5) 5_656 . ?
O2 K11 W7 82.3(4) 5_656 . ?
O501 K11 W7 99.7(5) . . ?
O122 K11 W7 30.3(4) . . ?
O509 K11 W7 117.9(5) 5_656 . ?
O8 K11 W7 83.1(4) . . ?
O505 K11 K12 45.6(5) . 5_656 ?
O7 K11 K12 127.6(5) . 5_656 ?
O1 K11 K12 47.6(4) 5_656 5_656 ?
O2 K11 K12 125.9(5) 5_656 5_656 ?
O501 K11 K12 119.7(5) . 5_656 ?
O122 K11 K12 122.9(4) . 5_656 ?
O509 K11 K12 49.3(5) 5_656 5_656 ?
O8 K11 K12 95.5(4) . 5_656 ?
W7 K11 K12 136.6(2) . 5_656 ?
O505 K11 W2 140.2(5) . 5_656 ?
O7 K11 W2 87.6(4) . 5_656 ?
O1 K11 W2 78.7(4) 5_656 5_656 ?
O2 K11 W2 22.6(4) 5_656 5_656 ?
O501 K11 W2 65.7(5) . 5_656 ?
O122 K11 W2 128.9(4) . 5_656 ?
O509 K11 W2 72.9(5) 5_656 5_656 ?
O8 K11 W2 132.4(4) . 5_656 ?
W7 K11 W2 104.81(17) . 5_656 ?
K12 K11 W2 107.58(19) 5_656 5_656 ?
O505 K11 W1 106.9(5) . 5_656 ?
O7 K11 W1 141.8(5) . 5_656 ?
O1 K11 W1 21.8(4) 5_656 5_656 ?
O2 K11 W1 79.5(4) 5_656 5_656 ?
O501 K11 W1 68.3(5) . 5_656 ?
O122 K11 W1 156.9(4) . 5_656 ?
O509 K11 W1 65.6(5) 5_656 5_656 ?
O8 K11 W1 104.5(4) . 5_656 ?
W7 K11 W1 160.7(2) . 5_656 ?
K12 K11 W1 61.28(15) 5_656 5_656 ?
W2 K11 W1 56.94(9) 5_656 5_656 ?
O505 K12 O5 139.1(7) 5_656 . ?
O505 K12 O1 90.6(6) 5_656 . ?
O5 K12 O1 101.7(6) . . ?
O505 K12 O14 93.3(7) 5_656 5_655 ?
O5 K12 O14 63.4(6) . 5_655 ?
O1 K12 O14 160.2(6) . 5_655 ?
O505 K12 O13 83.5(6) 5_656 5_655 ?
O5 K12 O13 135.2(6) . 5_655 ?
O1 K12 O13 87.7(6) . 5_655 ?
O14 K12 O13 111.9(6) 5_655 5_655 ?
O505 K12 O508 147.9(7) 5_656 5_655 ?
O5 K12 O508 72.7(6) . 5_655 ?
O1 K12 O508 74.6(6) . 5_655 ?
O14 K12 O508 110.3(6) 5_655 5_655 ?
O13 K12 O508 67.8(6) 5_655 5_655 ?
O505 K12 O128 82.4(6) 5_656 5_655 ?
O5 K12 O128 107.1(6) . 5_655 ?
O1 K12 O128 143.3(6) . 5_655 ?
O14 K12 O128 56.5(5) 5_655 5_655 ?
O13 K12 O128 55.7(5) 5_655 5_655 ?
O508 K12 O128 92.6(6) 5_655 5_655 ?
O505 K12 O509 69.2(7) 5_656 . ?
O5 K12 O509 77.5(7) . . ?
O1 K12 O509 72.7(6) . . ?
O14 K12 O509 90.6(7) 5_655 . ?
O13 K12 O509 145.7(7) 5_655 . ?
O508 K12 O509 129.6(7) 5_655 . ?
O128 K12 O509 135.3(6) 5_655 . ?
O505 K12 W13 86.7(5) 5_656 5_655 ?
O5 K12 W13 121.1(5) . 5_655 ?
O1 K12 W13 114.8(4) . 5_655 ?
O14 K12 W13 84.8(4) 5_655 5_655 ?
O13 K12 W13 27.2(4) 5_655 5_655 ?
O508 K12 W13 74.5(4) 5_655 5_655 ?
O128 K12 W13 29.2(4) 5_655 5_655 ?
O509 K12 W13 155.1(5) . 5_655 ?
O505 K12 K11 45.6(5) 5_656 5_656 ?
O5 K12 K11 124.3(5) . 5_656 ?
O1 K12 K11 46.9(4) . 5_656 ?
O14 K12 K11 129.1(5) 5_655 5_656 ?
O13 K12 K11 94.2(4) 5_655 5_656 ?
O508 K12 K11 120.0(5) 5_655 5_656 ?
O128 K12 K11 124.4(4) 5_655 5_656 ?
O509 K12 K11 51.9(5) . 5_656 ?
W13 K12 K11 114.4(2) 5_655 5_656 ?
O505 K12 W14 93.7(5) 5_656 5_655 ?
O5 K12 W14 78.3(5) . 5_655 ?
O1 K12 W14 173.4(5) . 5_655 ?
O14 K12 W14 24.4(4) 5_655 5_655 ?
O13 K12 W14 87.7(4) 5_655 5_655 ?
O508 K12 W14 99.2(5) 5_655 5_655 ?
O128 K12 W14 33.1(4) 5_655 5_655 ?
O509 K12 W14 113.5(5) . 5_655 ?
W13 K12 W14 60.51(10) 5_655 5_655 ?
K11 K12 W14 138.4(2) 5_656 5_655 ?
O505 K12 W1 107.3(5) 5_656 . ?
O5 K12 W1 79.1(5) . . ?
O1 K12 W1 22.6(4) . . ?
O14 K12 W1 139.9(4) 5_655 . ?
O13 K12 W1 104.4(4) 5_655 . ?
O508 K12 W1 68.3(4) 5_655 . ?
O128 K12 W1 157.6(4) 5_655 . ?
O509 K12 W1 66.7(5) . . ?
W13 K12 W1 129.25(18) 5_655 . ?
K11 K12 W1 61.78(14) 5_656 . ?
W14 K12 W1 156.62(19) 5_655 . ?
O503 K13 O504 74.0(14) . . ?
O503 K13 O501 135.9(12) . . ?
O504 K13 O501 141.6(12) . . ?
O503 K13 O502 72.3(12) . . ?
O504 K13 O502 142.2(12) . . ?
O501 K13 O502 76.1(8) . . ?
O503 K13 O8 75.1(11) . . ?
O504 K13 O8 104.1(11) . . ?
O501 K13 O8 71.3(7) . . ?
O502 K13 O8 83.5(8) . . ?
O503 K13 O6 116.8(11) . 5_656 ?
O504 K13 O6 111.5(11) . 5_656 ?
O501 K13 O6 79.0(7) . 5_656 ?
O502 K13 O6 70.2(8) . 5_656 ?
O8 K13 O6 144.3(7) . 5_656 ?
O503 K13 O1 134.6(11) . 5_656 ?
O504 K13 O1 71.3(11) . 5_656 ?
O501 K13 O1 70.4(6) . 5_656 ?
O502 K13 O1 146.5(8) . 5_656 ?
O8 K13 O1 85.8(6) . 5_656 ?
O6 K13 O1 102.8(6) 5_656 5_656 ?
O503 K13 O112 160.6(11) . 5_656 ?
O504 K13 O112 95.0(11) . 5_656 ?
O501 K13 O112 61.7(6) . 5_656 ?
O502 K13 O112 111.7(7) . 5_656 ?
O8 K13 O112 123.7(6) . 5_656 ?
O6 K13 O112 51.7(5) 5_656 5_656 ?
O1 K13 O112 51.2(5) 5_656 5_656 ?
O503 K13 W6 138.2(10) . 5_656 ?
O504 K13 W6 104.0(10) . 5_656 ?
O501 K13 W6 70.4(5) . 5_656 ?
O502 K13 W6 90.0(6) . 5_656 ?
O8 K13 W6 141.6(5) . 5_656 ?
O6 K13 W6 23.7(4) 5_656 5_656 ?
O1 K13 W6 79.1(4) 5_656 5_656 ?
O112 K13 W6 28.1(3) 5_656 5_656 ?
O503 K13 K11 121.9(10) . . ?
O504 K13 K11 102.6(10) . . ?
O501 K13 K11 44.8(5) . . ?
O502 K13 K11 109.5(7) . . ?
O8 K13 K11 48.8(4) . . ?
O6 K13 K11 117.8(5) 5_656 . ?
O1 K13 K11 43.2(4) 5_656 . ?
O112 K13 K11 75.6(3) 5_656 . ?
W6 K13 K11 99.53(18) 5_656 . ?
O503 K13 W1 151.2(10) . 5_656 ?
O504 K13 W1 77.9(10) . 5_656 ?
O501 K13 W1 67.7(5) . 5_656 ?
O502 K13 W1 136.3(6) . 5_656 ?
O8 K13 W1 106.2(5) . 5_656 ?
O6 K13 W1 79.4(5) 5_656 5_656 ?
O1 K13 W1 23.5(3) 5_656 5_656 ?
O112 K13 W1 28.3(3) 5_656 5_656 ?
W6 K13 W1 55.73(10) 5_656 5_656 ?
K11 K13 W1 58.72(14) . 5_656 ?
O3 K14 O3 174.2(9) 2_655 . ?
O3 K14 O116 121.2(6) 2_655 . ?
O3 K14 O116 57.2(5) . . ?
O3 K14 O116 57.2(5) 2_655 2_655 ?
O3 K14 O116 121.2(6) . 2_655 ?
O116 K14 O116 151.8(9) . 2_655 ?
O3 K14 O10 112.2(6) 2_655 2_655 ?
O3 K14 O10 67.5(6) . 2_655 ?
O116 K14 O10 122.3(6) . 2_655 ?
O116 K14 O10 55.9(6) 2_655 2_655 ?
O3 K14 O10 67.5(6) 2_655 . ?
O3 K14 O10 112.2(6) . . ?
O116 K14 O10 55.9(6) . . ?
O116 K14 O10 122.3(6) 2_655 . ?
O10 K14 O10 173.9(10) 2_655 . ?
O3 K14 W3 152.8(4) 2_655 . ?
O3 K14 W3 25.9(4) . . ?
O116 K14 W3 31.6(4) . . ?
O116 K14 W3 143.3(4) 2_655 . ?
O10 K14 W3 93.1(4) 2_655 . ?
O10 K14 W3 86.3(4) . . ?
O3 K14 W3 25.9(4) 2_655 2_655 ?
O3 K14 W3 152.8(4) . 2_655 ?
O116 K14 W3 143.3(4) . 2_655 ?
O116 K14 W3 31.6(4) 2_655 2_655 ?
O10 K14 W3 86.3(4) 2_655 2_655 ?
O10 K14 W3 93.1(4) . 2_655 ?
W3 K14 W3 168.4(3) . 2_655 ?
O3 K14 W10 93.1(4) 2_655 . ?
O3 K14 W10 85.9(4) . . ?
O116 K14 W10 29.2(4) . . ?
O116 K14 W10 142.4(5) 2_655 . ?
O10 K14 W10 151.1(5) 2_655 . ?
O10 K14 W10 26.7(4) . . ?
W3 K14 W10 60.01(4) . . ?
W3 K14 W10 117.78(8) 2_655 . ?
O3 K14 W10 85.9(4) 2_655 2_655 ?
O3 K14 W10 93.1(4) . 2_655 ?
O116 K14 W10 142.4(5) . 2_655 ?
O116 K14 W10 29.2(4) 2_655 2_655 ?
O10 K14 W10 26.7(4) 2_655 2_655 ?
O10 K14 W10 151.1(5) . 2_655 ?
W3 K14 W10 117.79(8) . 2_655 ?
W3 K14 W10 60.01(4) 2_655 2_655 ?
W10 K14 W10 160.8(3) . 2_655 ?
O506 K15 O14 84.1(12) . . ?
O506 K15 O507 143.6(16) . . ?
O14 K15 O507 127.0(12) . . ?
O506 K15 O4 68.2(12) . 5_655 ?
O14 K15 O4 139.8(7) . 5_655 ?
O507 K15 O4 75.4(12) . 5_655 ?
O506 K15 O11 93.4(13) . 6 ?
O14 K15 O11 139.1(7) . 6 ?
O507 K15 O11 75.3(12) . 6 ?
O4 K15 O11 73.4(6) 5_655 6 ?
O506 K15 O509 120.8(13) . 5_655 ?
O14 K15 O509 85.1(6) . 5_655 ?
O507 K15 O509 54.5(11) . 5_655 ?
O4 K15 O509 85.0(6) 5_655 5_655 ?
O11 K15 O509 129.0(7) 6 5_655 ?
O506 K15 W4 67.1(12) . 5_655 ?
O14 K15 W4 124.4(5) . 5_655 ?
O507 K15 W4 78.4(11) . 5_655 ?
O4 K15 W4 17.6(4) 5_655 5_655 ?
O11 K15 W4 91.0(5) 6 5_655 ?
O509 K15 W4 72.3(4) 5_655 5_655 ?
O506 K15 K12 102.5(12) . 5_655 ?
O14 K15 K12 41.7(4) . 5_655 ?
O507 K15 K12 93.4(11) . 5_655 ?
O4 K15 K12 115.5(5) 5_655 5_655 ?
O11 K15 K12 163.8(5) 6 5_655 ?
O509 K15 K12 43.7(4) 5_655 5_655 ?
W4 K15 K12 98.19(18) 5_655 5_655 ?
O302 P1 O302 112.6(15) . 3 ?
O302 P1 O301 108.5(10) . . ?
O302 P1 O301 110.8(10) 3 . ?
O302 P1 O301 110.8(10) . 3 ?
O302 P1 O301 108.5(10) 3 3 ?
O301 P1 O301 105.4(16) . 3 ?
O302 P1 K1 31.2(7) . 3 ?
O302 P1 K1 81.4(8) 3 3 ?
O301 P1 K1 122.9(8) . 3 ?
O301 P1 K1 123.6(8) 3 3 ?
O302 P1 K1 81.4(8) . . ?
O302 P1 K1 31.2(7) 3 . ?
O301 P1 K1 123.6(8) . . ?
O301 P1 K1 122.9(8) 3 . ?
K1 P1 K1 50.2(2) 3 . ?
O311 P2 O314 113.3(11) 3 . ?
O311 P2 O313 109.4(11) 3 . ?
O314 P2 O313 107.8(10) . . ?
O311 P2 O312 108.8(11) 3 . ?
O314 P2 O312 111.4(10) . . ?
O313 P2 O312 105.8(10) . . ?
O311 P2 K1 31.6(8) 3 3 ?
O314 P2 K1 81.8(7) . 3 ?
O313 P2 K1 123.4(7) . 3 ?
O312 P2 K1 122.5(8) . 3 ?
O311 P2 K1 81.8(8) 3 . ?
O314 P2 K1 31.6(7) . . ?
O313 P2 K1 123.6(7) . . ?
O312 P2 K1 123.0(8) . . ?
K1 P2 K1 50.22(19) 3 . ?
O322 P3 O324 112.9(11) . . ?
O322 P3 O321 107.8(11) . . ?
O324 P3 O321 111.4(11) . . ?
O322 P3 O323 109.9(11) . . ?
O324 P3 O323 109.4(11) . . ?
O321 P3 O323 105.2(11) . . ?
O322 P3 K1 31.5(8) . . ?
O324 P3 K1 81.4(7) . . ?
O321 P3 K1 122.8(8) . . ?
O323 P3 K1 123.2(8) . . ?
O322 P3 K1 81.6(8) . 3 ?
O324 P3 K1 31.2(7) . 3 ?
O321 P3 K1 124.2(8) . 3 ?
O323 P3 K1 123.4(8) . 3 ?
K1 P3 K1 50.2(2) . 3 ?
W1 O1 K11 121.8(9) . 5_656 ?
W1 O1 K12 119.3(9) . . ?
K11 O1 K12 85.4(5) 5_656 . ?
W1 O1 K13 111.3(8) . 5_656 ?
K11 O1 K13 86.8(5) 5_656 5_656 ?
K12 O1 K13 124.4(7) . 5_656 ?
W2 O2 K11 120.0(9) . 5_656 ?
W3 O3 K14 108.8(8) . . ?
W4 O4 K15 133.7(10) . 5_655 ?
W5 O5 K12 121.5(10) . . ?
W6 O6 K13 112.1(10) . 5_656 ?
W7 O7 K11 106.0(9) . . ?
W8 O8 K13 139.0(11) . . ?
W8 O8 K11 111.2(9) . . ?
K13 O8 K11 86.4(6) . . ?
W10 O10 K14 102.7(9) . . ?
W11 O11 K15 157.5(11) . 6_655 ?
W13 O13 K12 103.4(8) . 5_655 ?
W14 O14 K15 145.8(10) . . ?
W14 O14 K12 112.7(9) . 5_655 ?
K15 O14 K12 99.0(7) . 5_655 ?
W2 O101 W1 159.4(11) . . ?
W2 O101 K1 97.2(7) . . ?
W1 O101 K1 95.4(7) . . ?
W3 O102 W2 155.6(11) . . ?
W3 O102 K1 97.8(7) . . ?
W2 O102 K1 96.2(7) . . ?
W4 O103 W3 160.3(12) . . ?
W4 O103 K1 97.1(8) . . ?
W3 O103 K1 93.9(8) . . ?
W5 O104 W4 156.7(11) . . ?
W5 O104 K1 96.3(7) . . ?
W4 O104 K1 95.6(7) . . ?
W1 O105 W5 160.4(10) . . ?
W1 O105 K1 96.5(7) . . ?
W5 O105 K1 95.2(6) . . ?
W15 O111 W1 144.1(12) . . ?
W6 O112 W1 156.2(10) . . ?
W6 O112 K13 97.0(6) . 5_656 ?
W1 O112 K13 100.0(6) . 5_656 ?
W2 O113 W7 143.7(11) . . ?
W2 O114 W8 150.4(11) . . ?
W3 O115 W9 147.1(12) . . ?
W10 O116 W3 155.8(12) . . ?
W10 O116 K14 100.4(8) . . ?
W3 O116 K14 96.1(8) . . ?
W4 O117 W11 146.9(11) . . ?
W12 O118 W4 151.7(11) . . ?
W13 O119 W5 147.2(11) . . ?
W14 O120 W5 154.8(12) . . ?
W6 O121 W7 161.2(11) . . ?
W7 O122 W8 146.4(11) . . ?
W7 O122 K11 94.8(7) . . ?
W8 O122 K11 101.3(7) . . ?
W8 O123 W9 158.5(10) . . ?
W9 O124 W10 148.9(10) . . ?
W10 O125 W11 163.3(12) . . ?
W11 O126 W12 151.1(12) . . ?
W12 O127 W13 160.9(11) . . ?
W13 O128 W14 148.6(10) . . ?
W13 O128 K12 99.7(7) . 5_655 ?
W14 O128 K12 98.2(6) . 5_655 ?
W14 O129 W15 158.8(11) . . ?
W15 O130 W6 150.2(11) . . ?
W10 O201 W11 118.9(9) . 3 ?
W12 O202 W9 121.2(11) 3 . ?
W13 O203 W8 119.8(10) 3 . ?
W14 O204 W7 116.2(9) 3 . ?
W15 O205 W6 119.0(10) 3 . ?
P1 O301 W15 124.8(11) . 3 ?
P1 O301 W6 128.2(12) . . ?
W15 O301 W6 94.7(8) 3 . ?
P1 O302 W1 132.0(11) . 3 ?
P1 O302 K1 132.0(10) . 3 ?
W1 O302 K1 96.0(7) 3 3 ?
P2 O311 W5 134.0(12) 3 . ?
P2 O311 K1 132.1(11) 3 . ?
W5 O311 K1 93.9(7) . . ?
P2 O312 W13 124.4(11) . 3 ?
P2 O312 W8 127.6(11) . . ?
W13 O312 W8 95.4(7) 3 . ?
P2 O313 W14 128.7(10) . 3 ?
P2 O313 W7 124.5(10) . . ?
W14 O313 W7 95.5(7) 3 . ?
P2 O314 W2 132.4(11) . . ?
P2 O314 K1 131.4(10) . . ?
W2 O314 K1 96.0(6) . . ?
P3 O321 W9 126.3(11) . . ?
P3 O321 W12 125.9(11) . 3 ?
W9 O321 W12 95.1(7) . 3 ?
P3 O322 W3 133.3(12) . . ?
P3 O322 K1 132.1(11) . . ?
W3 O322 K1 94.6(7) . . ?
P3 O323 W10 129.7(12) . . ?
P3 O323 W11 124.6(11) . 3 ?
W10 O323 W11 94.8(7) . 3 ?
P3 O324 W4 132.5(11) . 3 ?
P3 O324 K1 132.0(10) . 3 ?
W4 O324 K1 95.5(6) 3 3 ?
K13 O501 K11 93.0(7) . . ?
K11 O505 K12 88.9(7) . 5_656 ?
K12 O509 K11 78.8(6) . 5_656 ?
K12 O509 K15 84.8(6) . 5_655 ?
K11 O509 K15 143.6(9) 5_656 5_655 ?

loop_
 _geom_torsion_atom_site_label_1
 _geom_torsion_atom_site_label_2
 _geom_torsion_atom_site_label_3
 _geom_torsion_atom_site_label_4
 _geom_torsion
 _geom_torsion_site_symmetry_1
 _geom_torsion_site_symmetry_2
 _geom_torsion_site_symmetry_3
 _geom_torsion_site_symmetry_4
 _geom_torsion_publ_flag
O105 W1 O1 K11 94.1(10) . . . 5_656 ?
O111 W1 O1 K11 -172.2(10) . . . 5_656 ?
O112 W1 O1 K11 -86.7(10) . . . 5_656 ?
O101 W1 O1 K11 5.0(11) . . . 5_656 ?
K1 W1 O1 K11 48.7(13) . . . 5_656 ?
K12 W1 O1 K11 103.9(13) . . . 5_656 ?
K13 W1 O1 K11 -99.9(12) 5_656 . . 5_656 ?
O105 W1 O1 K12 -9.8(10) . . . . ?
O111 W1 O1 K12 83.9(10) . . . . ?
O112 W1 O1 K12 169.4(9) . . . . ?
O101 W1 O1 K12 -98.9(10) . . . . ?
K1 W1 O1 K12 -55.2(13) . . . . ?
K11 W1 O1 K12 -103.9(13) 5_656 . . . ?
K13 W1 O1 K12 156.2(14) 5_656 . . . ?
O105 W1 O1 K13 -166.0(8) . . . 5_656 ?
O111 W1 O1 K13 -72.3(9) . . . 5_656 ?
O112 W1 O1 K13 13.2(9) . . . 5_656 ?
O101 W1 O1 K13 104.9(8) . . . 5_656 ?
K1 W1 O1 K13 148.7(4) . . . 5_656 ?
K12 W1 O1 K13 -156.2(14) . . . 5_656 ?
K11 W1 O1 K13 99.9(12) 5_656 . . 5_656 ?
O101 W2 O2 K11 -7.7(11) . . . 5_656 ?
O113 W2 O2 K11 85.7(10) . . . 5_656 ?
O114 W2 O2 K11 175.2(10) . . . 5_656 ?
O102 W2 O2 K11 -94.8(10) . . . 5_656 ?
K1 W2 O2 K11 -52.6(13) . . . 5_656 ?
O102 W3 O3 K14 -173.4(8) . . . . ?
O115 W3 O3 K14 -76.2(9) . . . . ?
O116 W3 O3 K14 9.8(10) . . . . ?
O103 W3 O3 K14 98.1(9) . . . . ?
K1 W3 O3 K14 143.1(5) . . . . ?
O103 W4 O4 K15 83.0(15) . . . 5_655 ?
O117 W4 O4 K15 177.9(14) . . . 5_655 ?
O118 W4 O4 K15 -93.1(14) . . . 5_655 ?
O104 W4 O4 K15 -4.6(15) . . . 5_655 ?
K1 W4 O4 K15 38.3(19) . . . 5_655 ?
O104 W5 O5 K12 93.7(11) . . . . ?
O119 W5 O5 K12 -170.6(10) . . . . ?
O105 W5 O5 K12 5.1(12) . . . . ?
O120 W5 O5 K12 -84.3(11) . . . . ?
K1 W5 O5 K12 48.4(15) . . . . ?
O121 W6 O6 K13 -103.5(10) . . . 5_656 ?
O112 W6 O6 K13 -4.8(11) . . . 5_656 ?
O205 W6 O6 K13 158.6(9) . . . 5_656 ?
O130 W6 O6 K13 74.2(9) . . . 5_656 ?
O301 W6 O6 K13 110(4) . . . 5_656 ?
O122 W7 O7 K11 -16.3(9) . . . . ?
O113 W7 O7 K11 76.1(9) . . . . ?
O204 W7 O7 K11 -113.8(8) . . . . ?
O121 W7 O7 K11 159.3(8) . . . . ?
O123 W8 O8 K13 -54.1(16) . . . . ?
O114 W8 O8 K13 44.5(16) . . . . ?
O203 W8 O8 K13 -148.5(15) . . . . ?
O122 W8 O8 K13 127.6(15) . . . . ?
O312 W8 O8 K13 167(3) . . . . ?
K11 W8 O8 K13 110.1(18) . . . . ?
O123 W8 O8 K11 -164.2(8) . . . . ?
O114 W8 O8 K11 -65.6(9) . . . . ?
O203 W8 O8 K11 101.4(9) . . . . ?
O122 W8 O8 K11 17.5(9) . . . . ?
O312 W8 O8 K11 57(4) . . . . ?
O125 W10 O10 K14 -99.1(9) . . . . ?
O116 W10 O10 K14 0.5(10) . . . . ?
O201 W10 O10 K14 163.8(8) . . . . ?
O124 W10 O10 K14 80.2(8) . . . . ?
O323 W10 O10 K14 115(3) . . . . ?
O126 W11 O11 K15 113(3) . . . 6_655 ?
O201 W11 O11 K15 13(3) 3 . . 6_655 ?
O117 W11 O11 K15 -155(3) . . . 6_655 ?
O125 W11 O11 K15 -74(3) . . . 6_655 ?
O128 W13 O13 K12 -13.7(9) . . . 5_655 ?
O119 W13 O13 K12 77.9(8) . . . 5_655 ?
O203 W13 O13 K12 -113.8(8) 3 . . 5_655 ?
O127 W13 O13 K12 158.8(8) . . . 5_655 ?
O120 W14 O14 K15 139.1(18) . . . . ?
O129 W14 O14 K15 40(2) . . . . ?
O204 W14 O14 K15 -56.9(19) 3 . . . ?
O128 W14 O14 K15 -141.4(18) . . . . ?
O313 W14 O14 K15 -100(3) 3 . . . ?
K12 W14 O14 K15 -156(2) 5_655 . . . ?
O120 W14 O14 K12 -64.5(10) . . . 5_655 ?
O129 W14 O14 K12 -163.9(9) . . . 5_655 ?
O204 W14 O14 K12 99.5(9) 3 . . 5_655 ?
O128 W14 O14 K12 15.1(9) . . . 5_655 ?
O313 W14 O14 K12 56(4) 3 . . 5_655 ?
O2 W2 O101 W1 94(3) . . . . ?
O113 W2 O101 W1 -2(3) . . . . ?
O114 W2 O101 W1 -99(4) . . . . ?
O102 W2 O101 W1 -170(3) . . . . ?
O314 W2 O101 W1 -86(3) . . . . ?
K1 W2 O101 W1 -127(3) . . . . ?
K11 W2 O101 W1 88(3) 5_656 . . . ?
O2 W2 O101 K1 -138.9(7) . . . . ?
O113 W2 O101 K1 125.5(7) . . . . ?
O114 W2 O101 K1 28(4) . . . . ?
O102 W2 O101 K1 -42.6(7) . . . . ?
O314 W2 O101 K1 40.9(6) . . . . ?
K11 W2 O101 K1 -144.3(7) 5_656 . . . ?
O3 W3 O102 W2 96(3) . . . . ?
O115 W3 O102 W2 -2(3) . . . . ?
O116 W3 O102 W2 -96(4) . . . . ?
O103 W3 O102 W2 -168(3) . . . . ?
O322 W3 O102 W2 -85(3) . . . . ?
K1 W3 O102 W2 -124(3) . . . . ?
K14 W3 O102 W2 88(3) . . . . ?
O3 W3 O102 K1 -139.6(8) . . . . ?
O115 W3 O102 K1 122.3(8) . . . . ?
O116 W3 O102 K1 28(3) . . . . ?
O103 W3 O102 K1 -43.3(7) . . . . ?
O322 W3 O102 K1 39.5(7) . . . . ?
K14 W3 O102 K1 -147.4(5) . . . . ?
O4 W4 O103 W3 96(4) . . . . ?
O117 W4 O103 W3 0(4) . . . . ?
O118 W4 O103 W3 -101(5) . . . . ?
O104 W4 O103 W3 -167(4) . . . . ?
O324 W4 O103 W3 -84(4) 3 . . . ?
K1 W4 O103 W3 -123(4) . . . . ?
K15 W4 O103 W3 125(3) 5_655 . . . ?
O4 W4 O103 K1 -140.6(8) . . . . ?
O117 W4 O103 K1 123.1(7) . . . . ?
O118 W4 O103 K1 23(4) . . . . ?
O104 W4 O103 K1 -43.5(7) . . . . ?
O324 W4 O103 K1 39.0(7) 3 . . . ?
K15 W4 O103 K1 -112.0(5) 5_655 . . . ?
O5 W5 O104 W4 100(3) . . . . ?
O119 W5 O104 W4 1(3) . . . . ?
O105 W5 O104 W4 -163(3) . . . . ?
O120 W5 O104 W4 -89(4) . . . . ?
O311 W5 O104 W4 -81(3) . . . . ?
K1 W5 O104 W4 -120(3) . . . . ?
K12 W5 O104 W4 137(3) . . . . ?
O5 W5 O104 K1 -140.3(8) . . . . ?
O119 W5 O104 K1 121.3(7) . . . . ?
O105 W5 O104 K1 -43.3(7) . . . . ?
O120 W5 O104 K1 31(4) . . . . ?
O311 W5 O104 K1 39.1(7) . . . . ?
K12 W5 O104 K1 -103.3(4) . . . . ?
O6 W6 O112 W1 139(2) . . . . ?
O121 W6 O112 W1 -119(2) . . . . ?
O205 W6 O112 W1 1(4) . . . . ?
O130 W6 O112 W1 48(2) . . . . ?
O301 W6 O112 W1 -30(2) . . . . ?
K13 W6 O112 W1 135(3) 5_656 . . . ?
O6 W6 O112 K13 4.1(9) . . . 5_656 ?
O121 W6 O112 K13 105.7(7) . . . 5_656 ?
O205 W6 O112 K13 -133.9(16) . . . 5_656 ?
O130 W6 O112 K13 -86.8(7) . . . 5_656 ?
O301 W6 O112 K13 -165.4(7) . . . 5_656 ?
O3 W3 O115 W9 128(2) . . . . ?
O102 W3 O115 W9 -134(2) . . . . ?
O116 W3 O115 W9 32(2) . . . . ?
O103 W3 O115 W9 -30(5) . . . . ?
O322 W3 O115 W9 -50(2) . . . . ?
K1 W3 O115 W9 -84(2) . . . . ?
K14 W3 O115 W9 84(2) . . . . ?
O10 W10 O116 W3 132(3) . . . . ?
O125 W10 O116 W3 -124(3) . . . . ?
O201 W10 O116 W3 -4(5) . . . . ?
O124 W10 O116 W3 44(3) . . . . ?
O323 W10 O116 W3 -35(3) . . . . ?
K14 W10 O116 W3 132(3) . . . . ?
O10 W10 O116 K14 -0.5(10) . . . . ?
O125 W10 O116 K14 104.0(9) . . . . ?
O201 W10 O116 K14 -136.4(17) . . . . ?
O124 W10 O116 K14 -88.0(8) . . . . ?
O323 W10 O116 K14 -166.8(8) . . . . ?
O4 W4 O117 W11 124(2) . . . . ?
O103 W4 O117 W11 -138(2) . . . . ?
O118 W4 O117 W11 28(2) . . . . ?
O104 W4 O117 W11 -46(5) . . . . ?
O324 W4 O117 W11 -53.9(19) 3 . . . ?
K1 W4 O117 W11 -88.6(19) . . . . ?
K15 W4 O117 W11 124.8(17) 5_655 . . . ?
O13 W13 O119 W5 -125.4(19) . . . . ?
O128 W13 O119 W5 -26(2) . . . . ?
O203 W13 O119 W5 83(3) 3 . . . ?
O127 W13 O119 W5 145(2) . . . . ?
O312 W13 O119 W5 60.7(19) 3 . . . ?
K12 W13 O119 W5 -77.5(19) 5_655 . . . ?
O14 W14 O120 W5 134(3) . . . . ?
O129 W14 O120 W5 -124(3) . . . . ?
O204 W14 O120 W5 0(4) 3 . . . ?
O128 W14 O120 W5 46(3) . . . . ?
O313 W14 O120 W5 -34(3) 3 . . . ?
K12 W14 O120 W5 96(3) 5_655 . . . ?
O6 W6 O121 W7 115(4) . . . . ?
O112 W6 O121 W7 15(4) . . . . ?
O205 W6 O121 W7 -144(3) . . . . ?
O130 W6 O121 W7 -55(6) . . . . ?
O301 W6 O121 W7 -71(4) . . . . ?
K13 W6 O121 W7 70(4) 5_656 . . . ?
O7 W7 O122 W8 133.2(19) . . . . ?
O113 W7 O122 W8 33.8(19) . . . . ?
O204 W7 O122 W8 -126.3(19) . . . . ?
O121 W7 O122 W8 -27(5) . . . . ?
O313 W7 O122 W8 -53.1(19) . . . . ?
K11 W7 O122 W8 119(2) . . . . ?
O7 W7 O122 K11 14.4(8) . . . . ?
O113 W7 O122 K11 -85.0(7) . . . . ?
O204 W7 O122 K11 115.0(7) . . . . ?
O121 W7 O122 K11 -145(3) . . . . ?
O313 W7 O122 K11 -171.8(7) . . . . ?
O8 W8 O123 W9 111(3) . . . . ?
O114 W8 O123 W9 9(3) . . . . ?
O203 W8 O123 W9 -150(3) . . . . ?
O122 W8 O123 W9 -77(5) . . . . ?
O312 W8 O123 W9 -78(3) . . . . ?
K11 W8 O123 W9 91(3) . . . . ?
O9 W9 O124 W10 137.1(18) . . . . ?
O115 W9 O124 W10 34.7(19) . . . . ?
O202 W9 O124 W10 -121.7(19) . . . . ?
O123 W9 O124 W10 -23(4) . . . . ?
O321 W9 O124 W10 -49.5(18) . . . . ?
O10 W10 O125 W11 113(4) . . . . ?
O116 W10 O125 W11 10(4) . . . . ?
O201 W10 O125 W11 -149(4) . . . . ?
O124 W10 O125 W11 -63(6) . . . . ?
O323 W10 O125 W11 -75(4) . . . . ?
K14 W10 O125 W11 61(4) . . . . ?
O11 W11 O126 W12 128(2) . . . . ?
O201 W11 O126 W12 -129(2) 3 . . . ?
O117 W11 O126 W12 26(2) . . . . ?
O125 W11 O126 W12 -25(5) . . . . ?
O323 W11 O126 W12 -58(2) 3 . . . ?
O12 W12 O127 W13 135(3) . . . . ?
O202 W12 O127 W13 -127(3) 3 . . . ?
O118 W12 O127 W13 30(3) . . . . ?
O126 W12 O127 W13 -37(6) . . . . ?
O321 W12 O127 W13 -56(3) 3 . . . ?
O13 W13 O128 W14 137.3(19) . . . . ?
O119 W13 O128 W14 34.6(19) . . . . ?
O203 W13 O128 W14 -121.4(19) 3 . . . ?
O127 W13 O128 W14 -7(5) . . . . ?
O312 W13 O128 W14 -49.1(19) 3 . . . ?
K12 W13 O128 W14 124(2) 5_655 . . . ?
O13 W13 O128 K12 13.4(9) . . . 5_655 ?
O119 W13 O128 K12 -89.3(7) . . . 5_655 ?
O203 W13 O128 K12 114.7(7) 3 . . 5_655 ?
O127 W13 O128 K12 -131(3) . . . 5_655 ?
O312 W13 O128 K12 -173.0(7) 3 . . 5_655 ?
O14 W14 O129 W15 117(3) . . . . ?
O120 W14 O129 W15 15(3) . . . . ?
O204 W14 O129 W15 -146(3) 3 . . . ?
O128 W14 O129 W15 -58(6) . . . . ?
O313 W14 O129 W15 -72(3) 3 . . . ?
K12 W14 O129 W15 100(3) 5_655 . . . ?
O15 W15 O130 W6 130(2) . . . . ?
O111 W15 O130 W6 30(2) . . . . ?
O205 W15 O130 W6 -128(2) 3 . . . ?
O129 W15 O130 W6 -35(5) . . . . ?
O301 W15 O130 W6 -56(2) 3 . . . ?
O302 P1 O301 W15 57.7(16) . . . 3 ?
O302 P1 O301 W15 -178.2(12) 3 . . 3 ?
O301 P1 O301 W15 -61.0(10) 3 . . 3 ?
K1 P1 O301 W15 88.7(13) 3 . . 3 ?
K1 P1 O301 W15 149.6(8) . . . 3 ?
O302 P1 O301 W6 -170.0(12) . . . . ?
O302 P1 O301 W6 -45.9(17) 3 . . . ?
O301 P1 O301 W6 71.3(12) 3 . . . ?
K1 P1 O301 W6 -139.0(9) 3 . . . ?
K1 P1 O301 W6 -78.1(15) . . . . ?
O302 P1 O302 W1 -179.9(18) 3 . . 3 ?
O301 P1 O302 W1 -56.9(17) . . . 3 ?
O301 P1 O302 W1 58.4(17) 3 . . 3 ?
K1 P1 O302 W1 179(3) 3 . . 3 ?
K1 P1 O302 W1 -179.6(14) . . . 3 ?
O302 P1 O302 K1 0.6(7) 3 . . 3 ?
O301 P1 O302 K1 123.6(14) . . . 3 ?
O301 P1 O302 K1 -121.1(14) 3 . . 3 ?
K1 P1 O302 K1 1.0(11) . . . 3 ?
O311 P2 O312 W13 56.8(15) 3 . . 3 ?
O314 P2 O312 W13 -177.5(11) . . . 3 ?
O313 P2 O312 W13 -60.6(14) . . . 3 ?
K1 P2 O312 W13 88.6(12) 3 . . 3 ?
K1 P2 O312 W13 149.2(7) . . . 3 ?
O311 P2 O312 W8 -171.0(12) 3 . . . ?
O314 P2 O312 W8 -45.4(16) . . . . ?
O313 P2 O312 W8 71.5(15) . . . . ?
K1 P2 O312 W8 -139.3(9) 3 . . . ?
K1 P2 O312 W8 -78.7(14) . . . . ?
O311 P2 O313 W14 -44.9(16) 3 . . 3 ?
O314 P2 O313 W14 -168.6(12) . . . 3 ?
O312 P2 O313 W14 72.1(14) . . . 3 ?
K1 P2 O313 W14 -76.7(13) 3 . . 3 ?
K1 P2 O313 W14 -137.9(9) . . . 3 ?
O311 P2 O313 W7 -179.4(11) 3 . . . ?
O314 P2 O313 W7 57.0(14) . . . . ?
O312 P2 O313 W7 -62.4(14) . . . . ?
K1 P2 O313 W7 148.8(7) 3 . . . ?
K1 P2 O313 W7 87.6(12) . . . . ?
O311 P2 O314 W2 178.7(13) 3 . . . ?
O313 P2 O314 W2 -60.1(16) . . . . ?
O312 P2 O314 W2 55.6(17) . . . . ?
K1 P2 O314 W2 177.4(14) 3 . . . ?
K1 P2 O314 W2 174(2) . . . . ?
O311 P2 O314 K1 4.5(17) 3 . . . ?
O313 P2 O314 K1 125.8(12) . . . . ?
O312 P2 O314 K1 -118.5(13) . . . . ?
K1 P2 O314 K1 3.2(10) 3 . . . ?
O322 P3 O321 W9 58.7(16) . . . . ?
O324 P3 O321 W9 -176.9(11) . . . . ?
O323 P3 O321 W9 -58.5(15) . . . . ?
K1 P3 O321 W9 89.6(13) . . . . ?
K1 P3 O321 W9 150.7(8) 3 . . . ?
O322 P3 O321 W12 -169.5(12) . . . 3 ?
O324 P3 O321 W12 -45.1(16) . . . 3 ?
O323 P3 O321 W12 73.3(15) . . . 3 ?
K1 P3 O321 W12 -138.7(8) . . . 3 ?
K1 P3 O321 W12 -77.6(13) 3 . . 3 ?
O324 P3 O322 W3 -179.3(13) . . . . ?
O321 P3 O322 W3 -55.9(18) . . . . ?
O323 P3 O322 W3 58.3(18) . . . . ?
K1 P3 O322 W3 180(3) . . . . ?
K1 P3 O322 W3 -179.2(15) 3 . . . ?
O324 P3 O322 K1 0.9(18) . . . . ?
O321 P3 O322 K1 124.4(14) . . . . ?
O323 P3 O322 K1 -121.5(14) . . . . ?
K1 P3 O322 K1 1.1(12) 3 . . . ?
O322 P3 O323 W10 -44.0(18) . . . . ?
O324 P3 O323 W10 -168.4(13) . . . . ?
O321 P3 O323 W10 71.8(16) . . . . ?
K1 P3 O323 W10 -76.1(16) . . . . ?
K1 P3 O323 W10 -137.0(10) 3 . . . ?
O322 P3 O323 W11 -178.9(12) . . . 3 ?
O324 P3 O323 W11 56.6(16) . . . 3 ?
O321 P3 O323 W11 -63.2(15) . . . 3 ?
K1 P3 O323 W11 148.9(8) . . . 3 ?
K1 P3 O323 W11 88.0(13) 3 . . 3 ?
O322 P3 O324 W4 -177.8(13) . . . 3 ?
O321 P3 O324 W4 60.8(17) . . . 3 ?
O323 P3 O324 W4 -55.1(17) . . . 3 ?
K1 P3 O324 W4 -177.3(14) . . . 3 ?
K1 P3 O324 W4 -178(2) 3 . . 3 ?
O322 P3 O324 K1 0.4(18) . . . 3 ?
O321 P3 O324 K1 -121.1(13) . . . 3 ?
O323 P3 O324 K1 123.1(13) . . . 3 ?
K1 P3 O324 K1 0.8(11) . . . 3 ?

#==============================================================================

#==============================================================================
# Additional structures and associated data_? identifiers
# should be added at this point if there is more than one 
# structure analysis in the CIF.

_shelxl_version_number 2013-4

_shelx_res_file
;
TITL 248_6_55
CELL  0.71075 32.84300 21.45500 19.12600 90.00000 90.00000 90.00000
ZERR  4 0.00600 0.00400 0.00400 0.00000 0.00000 0.00000
LATT 1
SYMM .50-X,    -Y,    +Z
SYMM    +X, .50-Y, .50-Z
SYMM .50-X, .50+Y, .50-Z
SFAC K O P W
UNIT 44 512 20 120
SHEL 6.790236 0.769625
L.S. 20
FMAP 2
PLAN 25
WPDB -2
HTAB
BOND $H
CONF
LIST 4
TEMP -173.0
ACTA
SIZE 0.100 0.060 0.040
ABIN
ISOR 0.0010 0.0010 P1
WGHT    0.052200 2525.744873
FVAR       0.01729
W1    4    0.481792    0.092942    0.248451    11.00000    0.01016    0.00657 =
         0.00911   -0.00032    0.00028   -0.00036
W2    4    0.547707    0.093589    0.409353    11.00000    0.01043    0.00736 =
         0.01070   -0.00057   -0.00088    0.00016
W3    4    0.656135    0.092771    0.351959    11.00000    0.01036    0.00915 =
         0.01362   -0.00175   -0.00135    0.00132
W4    4    0.659675    0.093137    0.156514    11.00000    0.01230    0.00858 =
         0.01384   -0.00171   -0.00004    0.00193
W5    4    0.551663    0.092389    0.091999    11.00000    0.01126    0.00710 =
         0.01138   -0.00077    0.00097    0.00020
W6    4    0.404238    0.173549    0.357520    11.00000    0.01005    0.00871 =
         0.00985    0.00056    0.00121   -0.00068
W7    4    0.473372    0.175593    0.517049    11.00000    0.01079    0.00851 =
         0.00975    0.00005    0.00006   -0.00013
W8    4    0.584578    0.173195    0.569058    11.00000    0.01150    0.01026 =
         0.01102    0.00051   -0.00105    0.00109
W9    4    0.694553    0.175544    0.505583    11.00000    0.01130    0.01152 =
         0.01328    0.00097   -0.00172    0.00030
W10   4    0.756582    0.171880    0.338879    11.00000    0.00921    0.01267 =
         0.01736   -0.00283   -0.00194    0.00136
W11   4    0.756851    0.174813    0.140041    11.00000    0.00822    0.01379 =
         0.01690   -0.00161    0.00093    0.00122
W12   4    0.684191    0.170354   -0.012019    11.00000    0.01203    0.01092 =
         0.01313   -0.00219    0.00128    0.00097
W13   4    0.574001    0.172188   -0.071387    11.00000    0.01218    0.00839 =
         0.01063   -0.00117    0.00069   -0.00034
W14   4    0.466712    0.171636   -0.000430    11.00000    0.01134    0.00748 =
         0.01016    0.00075   -0.00160   -0.00031
W15   4    0.398388    0.173130    0.160991    11.00000    0.00961    0.00897 =
         0.00988    0.00003   -0.00134   -0.00108
K1    1    0.579268    0.173687    0.250465    11.00000    0.01479    0.01709 =
         0.02081   -0.00081   -0.00044    0.00112
K11   1    0.499068    0.066229    0.653190    11.00000    0.01967    0.01553 =
         0.02468    0.00435   -0.00618    0.00164
K12   1    0.500313   -0.065554    0.150406    11.00000    0.01714    0.01835 =
         0.01410   -0.00327    0.00426   -0.00292
K13   1    0.613676    0.004305    0.674857    11.00000    0.02344    0.01708 =
         0.02568   -0.00423   -0.00678   -0.00068
K14   1    0.750000    0.000000    0.371469    10.50000    0.01282    0.01223 =
         0.03353    0.00000    0.00000    0.00573
K15   1    0.374321    0.086763   -0.119790    11.00000    0.02127    0.01780 =
         0.05357   -0.00843   -0.01165   -0.00287
P1    3    0.472873    0.250000    0.250000    10.50000    0.00711    0.00677 =
         0.00721    0.00025    0.00000    0.00000
P2    3    0.546383    0.250872    0.423696    11.00000    0.00598    0.00833 =
         0.01195    0.00246   -0.00506    0.00246
P3    3    0.665099    0.249587    0.358180    11.00000    0.00991    0.00776 =
         0.01216   -0.00411    0.00204    0.00349
O1    2    0.468358    0.015016    0.250449    11.00000    0.01029
O2    2    0.544081    0.014733    0.431519    11.00000    0.01121
O3    2    0.666413    0.015756    0.364137    11.00000    0.00960
O4    2    0.671165    0.016486    0.143221    11.00000    0.01644
O5    2    0.545545    0.014647    0.069349    11.00000    0.01909
O6    2    0.367389    0.121254    0.377959    11.00000    0.02090
O7    2    0.445033    0.123828    0.567404    11.00000    0.01225
O8    2    0.582907    0.123057    0.637472    11.00000    0.01562
O9    2    0.714637    0.125893    0.568901    11.00000    0.01374
O10   2    0.794367    0.120210    0.363265    11.00000    0.02139
O11   2    0.795518    0.125311    0.128501    11.00000    0.01528
O12   2    0.708313    0.121694   -0.069197    11.00000   10.02026
O13   2    0.578922    0.120502   -0.140025    11.00000    0.01342
O14   2    0.444009    0.120441   -0.056822    11.00000    0.01349
O15   2    0.363881    0.122702    0.130718    11.00000    0.01460
O101  2    0.523677    0.089532    0.320504    11.00000    0.00924
O102  2    0.599786    0.088240    0.360535    11.00000   10.00760
O103  2    0.648541    0.088512    0.250180    11.00000    0.01629
O104  2    0.601120    0.086881    0.141801    11.00000    0.00958
O105  2    0.524258    0.088874    0.180527    11.00000    0.00452
O111  2    0.441783    0.116615    0.180146    11.00000    0.01651
O112  2    0.441514    0.119661    0.316659    11.00000    0.00410
O113  2    0.497871    0.116871    0.452790    11.00000    0.01333
O114  2    0.575900    0.116412    0.492755    11.00000    0.01060
O115  2    0.666204    0.118877    0.444885    11.00000    0.01749
O116  2    0.711825    0.119103    0.334035    11.00000    0.01589
O117  2    0.712952    0.118959    0.169797    11.00000    0.01023
O118  2    0.664556    0.116782    0.059699    11.00000    0.01037
O119  2    0.576710    0.119369    0.007666    11.00000    0.00980
O120  2    0.499513    0.119066    0.048064    11.00000    0.01361
O121  2    0.429749    0.180412    0.441534    11.00000    0.01251
O122  2    0.519913    0.177687    0.569369    11.00000    0.01165
O123  2    0.638789    0.182880    0.554866    11.00000   10.00380
O124  2    0.736790    0.175729    0.442887    11.00000    0.00517
O125  2    0.764222    0.179227    0.247185    11.00000    0.01658
O126  2    0.734639    0.177251    0.054632    11.00000    0.01470
O127  2    0.635239    0.173011   -0.055693    11.00000    0.01060
O128  2    0.518818    0.172918   -0.064448    11.00000   10.00760
O129  2    0.426049    0.179061    0.066713    11.00000    0.01188
O130  2    0.386176    0.177370    0.251482    11.00000    0.01135
O201  2    0.785358    0.246270    0.363096    11.00000    0.00677
O202  2    0.705646    0.254462    0.548983    11.00000    0.01472
O203  2    0.580775    0.250778    0.620716    11.00000    0.00982
O204  2    0.451481    0.253834    0.551848    11.00000    0.00695
O205  2    0.373361    0.249729    0.365529    11.00000    0.01117
O301  2    0.443754    0.251172    0.315686    11.00000    0.01592
O302  2    0.498255    0.308261    0.250517    11.00000    0.00910
O311  2    0.553921    0.192310    0.116644    11.00000    0.01211
O312  2    0.574316    0.251819    0.491375    11.00000    0.01174
O313  2    0.501114    0.251164    0.451284    11.00000    0.00636
O314  2    0.552501    0.192128    0.382021    11.00000    0.00675
O321  2    0.666136    0.248021    0.440119    11.00000    0.01228
O322  2    0.644793    0.192637    0.334115    11.00000    0.01067
O323  2    0.711113    0.248966    0.334896    11.00000    0.01501
O324  2    0.645014    0.307995    0.331574    11.00000    0.00731
O501  2    0.554063   -0.010996    0.579079    11.00000    0.02572
O502  2    0.654373    0.013295    0.546481    11.00000    0.04471
O503  2    0.674312    0.079575    0.691396    11.00000    0.08395
O504  2    0.625529    0.012317    0.810973    11.00000    0.08928
O505  2    0.488145    0.153531    0.751815    11.00000    0.02299
O506  2    0.361735    0.023637   -0.004770    11.00000    0.10706
O507  2    0.358124    0.089625   -0.258056    11.00000    0.09779
O508  2    0.556146   -0.013045   -0.075821    11.00000    0.01955
O509  2    0.566397   -0.031425    0.243523    11.00000    0.02833
HKLF 4

REM  248_6_55
REM R1 =  0.1038 for   14102 Fo > 4sig(Fo)  and  0.1138 for all   15430 data
REM    461 parameters refined using      6 restraints

END

WGHT      0.0522   2530.6848

REM No hydrogen bonds found for HTAB generation

REM Highest difference peak  4.751,  deepest hole -4.149,  1-sigma level  0.715
Q1    1   0.4284  0.0948  0.3036  11.00000  0.05    4.75
Q2    1   0.7053  0.0891  0.4302  11.00000  0.05    4.34
Q3    1   0.6040  0.0913  0.1017  11.00000  0.05    4.33
Q4    1   0.7500  0.0000  0.5157  10.50000  0.05    4.25
Q5    1   0.4991  0.0910  0.4737  11.00000  0.05    4.16
Q6    1   0.4282  0.0910  0.1956  11.00000  0.05    3.95
Q7    1   0.7500  0.0000  0.2362  10.50000  0.05    3.92
Q8    1   0.5016  0.0911  0.1585  11.00000  0.05    3.91
Q9    1   0.4123  0.1793 -0.0541  11.00000  0.05    3.88
Q10   1   0.3509  0.1737  0.2970  11.00000  0.05    3.86
Q11   1   0.5996  0.0972  0.4786  11.00000  0.05    3.82
Q12   1   0.2944  0.1006  0.0356  11.00000  0.05    3.80
Q13   1   0.3524  0.1730  0.4182  11.00000  0.05    3.75
Q14   1   0.7422  0.1687  0.5779  11.00000  0.05    3.68
Q15   1   0.4090  0.1700  0.0465  11.00000  0.05    3.54
Q16   1   0.5765  0.2500  0.2500  10.50000  0.05    3.50
Q17   1   0.4950  0.1015  0.3614  11.00000  0.05    3.47
Q18   1   0.7032  0.0956  0.0664  11.00000  0.05    3.44
Q19   1   0.6392  0.1690  0.0520  11.00000  0.05    3.43
Q20   1   0.5383  0.1764  0.6204  11.00000  0.05    3.38
Q21   1   0.8074  0.1719  0.2750  11.00000  0.05    3.36
Q22   1   0.5171  0.1751 -0.0040  11.00000  0.05    3.33
Q23   1   0.4999  0.0823  0.0337  11.00000  0.05    3.31
Q24   1   0.6010  0.0908  0.2968  11.00000  0.05    3.30
Q25   1   0.4628  0.1732  0.2953  11.00000  0.05    3.19
;

_shelx_res_checksum   97753

_shelx_hkl_file
;
   0  -3  -1    5.29    2.49
   0   3   1    5.48    2.63
   0   3  -1    5.23    2.15
   0   3   1    4.61    1.82
   5   0   0    1.94    1.33
  -5   0   0    0.74    0.81
  -1  -3  -1  517.47   14.30
   1   3  -1  613.38   16.70
  -1   3  -1  532.13   14.67
  -1   3   1  650.53   17.69
   1   3   1  491.04   27.47
   1  -3  -1  559.93   15.51
   2  -3   0  507.28    5.73
   2   3   0  506.48    5.35
  -2  -3   0  449.42   25.12
  -2   3   0  510.87   14.02
  -2  -2   2   86.19    8.09
  -2   2  -2   66.43    7.01
  -2   2  -2   75.90    9.52
   2  -2   2   82.11    8.21
  -2   2   2  115.71    3.10
   2  -2  -2  102.61    9.80
   4   2   0   21.92    2.13
   4  -2   0   23.19    2.42
   4   2   0   23.47    4.54
   0   0   3   16.84    2.45
   0   0  -3   16.64    2.90
   0   0  -3    1.25    1.06
   5  -1   0    2.37    1.68
  -5   1   0    1.21    0.93
  -5  -1   0    0.32    0.40
   1   0  -3   14.99    4.07
   1   0   3   18.77    3.08
  -1   0  -3   16.43    4.81
  -1   0  -3   17.07    3.33
  -4   0   2   71.61    7.54
   4   0   2   42.47    6.56
  -4   0  -2   53.68    9.13
   4   0   2   58.78    9.34
   5   0   1    0.77    0.78
  -5   0  -1    1.06    1.15
   5   0   1    3.85    2.28
   5   0  -1    4.05    1.71
   2   3   1    2.74    1.01
   2  -3  -1    5.73    2.46
   2   3   1    4.51    1.49
   2  -3   1    4.32    1.59
   2   3  -1    3.17    1.24
  -2  -3  -1    3.79    1.12
   2   3  -1   10.50    3.16
  -2   3   1   11.56    2.61
  -2   3  -1    2.75    1.56
  -4   2   1    0.76    0.82
  -4   2  -1    0.67    0.90
   4   2   1    2.94    2.18
   4   2  -1    0.78    0.56
   4  -2   1    1.62    1.49
   4  -2  -1    1.75    1.66
   4   2   1    5.67    2.96
   4  -2  -1    1.35    1.17
   4  -2   1    0.56    1.17
   0  -1   3    2.85    1.79
   0  -1  -3    1.80    1.52
   0   1  -3    1.85    1.59
   0   1   3    1.54    1.26
   0   1  -3    2.55    2.24
   1   1  -3   89.69   10.80
  -1   1  -3   94.88   11.03
  -1  -1  -3   59.40    8.95
   1  -1   3   72.96    7.73
  -1  -1   3   69.32    7.24
   1  -1  -3   68.30    6.89
   1   1   3   75.51    7.77
  -1   1  -3  128.13   11.04
   1   1   3   88.29    8.79
  -1   1   3   75.83    7.70
   3  -3   0    1.40    1.27
  -3   3   0    1.13    0.72
   3   3   0    0.82    0.84
  -3   3   0    0.46    0.84
   3   3   0    0.12    0.96
  -3  -3   0    1.50    1.42
   3  -3   0    0.70    0.85
   4  -1  -2   31.21    5.27
   4   1  -2   35.95   10.08
  -4   1  -2   23.56    3.91
  -4   1   2   33.93    6.52
   4   1   2   21.91    6.64
  -4  -1  -2   19.68    4.30
   4   1   2   25.39    5.72
   4   1  -2   23.95    3.86
   4  -1   2   18.10    5.05
   4  -1  -2   23.02    3.98
   3   2  -2    0.85    1.09
  -3   2   2    0.77    1.35
  -3  -2  -2    0.67    1.10
   3  -2   2    1.80    0.83
   3  -2   2    2.87    1.66
   3   2   2    3.15    1.36
   3  -2  -2    1.45    1.53
  -3   2  -2    1.58    0.92
   5  -1   1   30.91    4.84
   5  -1  -1   30.68    6.19
  -5  -1  -1   32.01    4.85
  -5   1  -1   33.33    5.81
   5   1  -1   29.69    5.08
   5   1   1   34.03    5.03
   5  -1   1   27.86    2.99
   5   1   1   21.03    3.16
   5   1  -1   33.54    4.94
  -2   0  -3    1.43    1.37
  -2   0  -3    1.56    1.62
   2   0   3   -0.14    1.66
   2   0  -3    1.56    1.29
  -2   0   3    0.66    1.39
   2   1   3   -0.03    0.19
   2  -1  -3    1.67    1.35
  -2  -1  -3    1.02    2.24
  -2   1  -3    0.51    1.74
  -2  -1  -3    1.68    0.91
   2   1  -3    1.78    2.27
  -2   1  -3    1.59    1.71
   2   1   3    1.35    1.44
  -2  -1   3    0.39    0.65
  -2   1   3    4.37    2.03
   0  -3  -2    0.52    1.11
   0   3   2    0.21    0.88
   0   3  -2    0.81    0.61
   0  -3   2    0.68    0.62
   3   3   1    2.46    0.79
  -3  -3   1    5.17    2.11
   3  -3  -1    4.19    1.67
   3   3  -1    7.23    3.30
  -3   3   1    7.24    2.64
  -3   3  -1    1.73    0.91
   3   3   1    1.72    0.65
   3  -3  -1    5.57    2.82
  -3  -3  -1    3.29    1.55
   3  -3   1    4.20    1.73
   3  -3   1    4.04    1.96
   1  -3  -2    1.69    1.15
  -1   3   2    0.63    0.69
  -1  -3   2    0.04    0.38
  -1   3  -2    1.48    1.21
   1   3  -2    3.99    2.30
   1  -3   2    1.26    1.05
   1   3   2    0.79    0.91
  -1   3   2    0.81    0.80
  -1   3  -2    1.44    1.01
  -1  -3  -2    0.92    0.88
   1  -3  -2    0.94    0.73
   1   3   2    1.19    1.67
  -5   2   0    0.28    0.78
   5  -2   0    1.01    0.66
   5   2   0    0.80    1.28
  -5   2   0    0.99    1.20
   5   2   0    2.50    1.66
  -3   0  -3   38.97    7.30
   3   0   3   37.08    5.87
   3   0   3   35.40    5.53
   3   0  -3   40.13    7.59
  -3   0  -3   35.65    6.68
  -3   0   3   40.57    5.91
   0  -2  -3    1.15    1.41
   0   2  -3    2.14    1.23
   0  -2  -3    0.94    1.02
   0   2  -3    1.91    1.17
   0   2   3   -0.13    1.00
   0  -2   3    1.79    1.63
   6   0   0   75.78    7.91
  -6   0   0   75.79    7.76
  -5   0  -2    0.63    1.20
   5   0  -2    2.34    1.98
   5   0   2    0.13    1.08
  -5   0   2    5.99    2.79
  -2   3   2   27.06    7.96
  -2  -3   2   14.63    2.02
  -2  -3  -2   15.33    2.24
   2   3   2   18.42    2.68
  -2   3  -2   11.54    3.69
   2  -3  -2   18.91    2.91
   2  -3   2   13.50    2.38
  -2   3  -2   20.24    5.42
   1   2  -3  120.16   13.35
   1   2   3   86.76    9.08
   1  -2   3   72.32    7.82
  -1  -2   3  105.62   10.39
  -1   2   3   86.00    8.51
   1  -2  -3   78.56    7.82
  -1  -2  -3   68.22    8.21
   1  -2  -3   73.27    7.58
  -1   2  -3   70.01    8.48
   1   2  -3   80.17    8.22
  -1  -2  -3   68.74    8.65
  -1   2  -3   74.83    8.04
   1   2   3   79.61    8.46
   4  -3   0   14.25    1.54
   4  -3   0   14.09    2.81
  -4   3   0   16.16    3.63
  -4  -3   0   15.39    3.34
  -4   3   0   17.30    5.04
   4   3   0   14.87    2.03
   4   2   2   41.83    6.85
   4   2  -2   39.03    8.16
  -4  -2  -2   43.35    6.74
   4   2  -2   42.00    6.64
   4  -2   2   43.98    6.57
  -4   2   2   46.50    7.24
   4  -2  -2   48.23    7.17
   4  -2  -2   45.76    6.85
  -4   2  -2   46.69    7.57
   4   2  -2   41.47    5.99
   5  -2  -1   66.70    8.01
  -5   2  -1   65.70    7.25
  -5   2   1   75.01    7.42
   5   2  -1   69.33    7.25
   5  -2   1   60.93    3.06
   5   2  -1  103.01   10.97
   5   2   1   60.51    4.65
   5  -2   1   75.21    7.63
   3  -1  -3   35.29    5.42
   3  -1   3   32.21    5.55
   3   1   3   30.75    4.52
  -3   1   3   50.67    7.33
  -3  -1  -3   31.86    5.97
   3   1  -3   42.50    8.64
   3  -1  -3   46.83    7.78
  -3   1  -3   29.95    5.37
  -3   1  -3   34.28   10.51
   3  -1   3   27.93    2.78
   3   1   3   38.20    5.73
  -6   1   0   88.47    8.88
   6  -1   0   96.00   11.97
   6   1   0   76.12    8.29
  -6  -1   0   87.25    8.26
  -1  -4   0   18.52    6.42
   1  -4   0   21.61    4.58
  -1   4   0   28.85    5.20
   1   4   0   16.38    3.50
  -1   4   0   22.56    6.04
  -6   0  -1    0.32    0.59
   6   0   1    1.32    1.29
   6   0   1    1.37    1.27
   6   0  -1    0.51    0.55
   5   1  -2    7.30    2.65
   5  -1  -2    6.08    2.73
   5   1   2    9.96    3.15
  -5   1  -2    6.57    2.41
  -5  -1  -2    7.19    3.51
   5  -1   2    6.23    3.43
   5  -1  -2    7.21    3.66
  -5   1   2    9.07    3.38
   5   1  -2    6.40    3.75
   5   1  -2    5.53    2.72
   2  -2  -3    2.14    1.68
  -2  -2   3    0.96    1.44
  -2   2  -3    1.88    0.84
  -2  -2  -3    1.44    1.22
   2   2  -3    1.42    2.21
   2  -2  -3    0.35    0.65
   2   2   3    1.06    0.94
   2   2  -3    2.43    1.82
  -2   2   3    0.86    1.27
  -2  -2  -3    0.65    1.14
  -2   2  -3    1.73    1.71
   2   2   3    0.51    1.60
   4  -3  -1   -0.04    1.19
  -4   3  -1    0.79    0.73
  -4  -3  -1    2.45    1.51
   4  -3   1    1.86    2.01
   4   3  -1    3.07    1.74
   4  -3  -1    1.81    1.70
   4   3  -1    0.83    1.05
  -4   3   1    0.17    0.38
  -4  -3   1    1.21    0.92
  -4   3  -1    1.02    1.12
   4   3   1    1.19    2.65
   4  -3   1    1.06    1.02
   0  -4  -1    3.64    1.41
   0  -4   1    3.47    1.05
   0   4  -1    5.87    3.49
   0   4   1    4.27    1.14
   0   4  -1    9.43    2.17
   6   1   1    1.92    2.25
   6  -1   1    1.94    1.28
   6   1   1   -0.47    0.96
   6   1  -1    0.57    1.28
   6  -1   1    3.88    1.38
  -6  -1  -1    1.22    1.20
   6   1  -1    0.34    0.94
   6  -1  -1    1.52    1.40
  -6   1  -1    0.85    0.67
  -6   1   1   -0.23    0.72
   1   4  -1  139.79   11.45
  -1   4  -1  137.77   12.24
  -1   4   1  139.27   11.52
   1   4   1  127.34   10.59
  -1  -4   1  136.48   11.45
  -1  -4  -1  128.15   10.59
   1  -4  -1  134.49   12.98
   1  -4   1  145.95   11.68
   1   4   1  161.94   12.93
  -1   4   1  148.32   12.88
   2   4   0  168.87   13.48
  -2   4   0  175.29   14.96
  -2  -4   0  157.65   12.71
   2   4   0  162.14   13.28
   2  -4   0  175.63   15.82
  -2   4   0  164.15   13.32
   3   3  -2   11.68    2.69
   3   3   2    4.32    1.95
   3  -3   2    6.66    2.85
   3   3   2    5.94    2.48
  -3  -3  -2    6.34    2.80
  -3   3  -2    7.96    2.66
  -3   3  -2    5.48    2.57
   3  -3  -2   10.19    2.82
  -3   3   2    9.17    5.39
   3   3  -2   11.07    2.50
   4   0  -3    1.57    1.07
  -4   0  -3    1.58    1.27
   4   0  -3    0.42    0.95
  -4   0   3    1.16    1.20
   4   0   3    1.99    1.81
   4   0   3    0.72    1.60
   2   4   1    1.67    0.59
   2  -4   1    1.12    0.99
   2  -4   1    1.27    1.45
  -2   4  -1    0.94    0.88
  -2  -4   1   -0.05    0.84
  -2  -4  -1    1.95    1.85
  -2   4   1    1.27    1.14
   2   4   1    1.04    1.06
   2  -4  -1    0.26    1.32
  -2   4  -1    0.85    1.50
   2   4  -1    1.95    1.34
   2  -4  -1    0.63    0.95
  -2   4   1    1.19    0.80
   2   4  -1    0.99    1.40
   4  -1   3    2.86    1.79
   4  -1  -3    1.42    0.70
   4   1  -3    0.67    1.23
  -4   1  -3    1.03    1.15
   4  -1  -3    0.92    1.43
  -4  -1  -3    0.40    0.92
   4  -1   3    0.52    1.35
  -4   1  -3    0.91    1.19
  -4   1   3    1.56    1.19
   4   1   3    0.76    1.13
   4   1   3    0.86    0.79
  -3  -2   3  439.18   24.55
   3   2   3  539.96   15.45
   3   2   3  480.08   26.80
  -3   2   3  532.31   15.23
  -3  -2  -3  384.03   22.57
   3  -2  -3  503.66    7.04
   3   2  -3  512.17   14.66
   3  -2  -3  449.35   25.48
  -3  -2  -3  448.09   25.28
   3  -2   3  402.59   23.31
  -6   2   0  594.10   16.59
  -6   2   0  593.91   16.29
   6   2   0  619.79   19.44
   6  -2   0  670.03   18.92
  -6  -2   0  602.00   16.13
   6   2   0  663.91   19.25
   5  -3   0   -0.02    0.77
   5   3   0    0.71    0.92
   5  -3   0    0.97    1.04
  -5   3   0    1.54    0.95
   5   3   0    1.20    1.08
  -5   3   0   -0.32    0.99
   5  -2   2    1.71    2.34
   5   2  -2    3.56    2.07
   5   2  -2    1.52    0.78
  -5   2  -2    1.97    1.15
   5  -2  -2    1.53    1.30
   5   2  -2    0.30    1.33
   5   2   2    2.54    2.12
   5   2   2    2.63    1.86
  -5   2   2    0.16    1.06
   5  -2  -2    2.20    1.80
  -5   2  -2    4.33    1.82
   5  -2   2    2.09    1.60
  -5  -2  -2    1.52    1.18
   5   2  -2    0.60    0.95
  -3   4   0    0.42    0.71
  -3   4   0    0.78    0.94
   3   4   0    1.03    1.07
   3   4   0    0.65    0.57
  -3  -4   0    0.39    0.81
   3  -4   0   -0.05    1.39
   3  -4   0    0.43    0.56
   0   0  -4  326.85   19.38
   0  -3   3    3.94    2.93
   0   3  -3    1.11    1.84
   0   3  -3    3.34    2.14
   0  -3  -3    4.18    1.73
   0  -3  -3    4.43    2.56
   0   3   3    6.20    2.80
   0   3   3    4.37    2.44
   6   0   2   14.82    5.76
  -6   0  -2   20.84    5.96
   6   0  -2   13.97    2.42
  -6   0   2   19.31    4.76
   6   0   2   13.96    4.75
  -1   0   4    2.14    2.12
  -1   0  -4    4.78    3.40
  -1   0  -4    2.73    1.82
   1   0  -4    2.92    3.99
  -6  -2  -1    1.22    0.69
   6   2  -1    0.49    0.75
   6  -2   1   -0.11    1.66
   6   2   1    1.27    1.49
   6   2  -1    0.47    0.94
   6  -2  -1    1.63    1.59
   6  -2   1    1.57    1.56
   6   2  -1    1.40    1.04
   6   2   1    1.04    1.05
   6   2  -1    0.23    0.85
  -6   2  -1    0.76    0.75
  -6   2   1    1.58    1.17
  -6   2  -1    1.20    0.72
  -1  -3  -3  118.20   11.10
   1  -3  -3  124.70   10.31
   1  -3   3  112.53    5.89
   1   3  -3  131.48   11.10
  -1   3   3  145.02   12.02
   1   3   3  121.19   10.73
   1   3   3  155.84   12.77
  -1  -3  -3  109.06   11.90
   1  -3  -3  117.39   10.80
  -1  -3   3  114.24    3.68
  -1   3  -3  140.55   15.56
  -1   3  -3  123.75   10.66
   1   3  -3  183.78   15.69
  -4  -3  -2  240.47   14.56
   4  -3   2  301.93   17.30
   4  -3   2  308.38   17.91
   4  -3  -2  358.72   21.35
  -4   3  -2  305.86   17.64
  -4   3  -2  299.72   17.28
   4   3  -2  324.59   18.45
  -4   3   2  397.80   23.15
   4   3   2  315.03   17.83
   4   3  -2  349.15   20.77
   7   0   0    0.74    0.79
  -7   0   0    0.62    0.89
   7   0   0   -0.20    1.72
  -5   3   1  120.06    9.84
  -5   3  -1  104.42    9.97
   5   3  -1  120.93   10.17
  -5   3  -1   94.47    9.04
   5  -3   1  109.38   11.65
   5  -3  -1  110.82   13.94
   5  -3  -1  104.46   11.56
   5   3  -1  120.08   14.04
   5   3  -1  107.57   10.59
   5  -3   1  107.81   10.42
   0  -4  -2   67.57    7.51
   0  -4   2   71.52    7.72
   0   4   2   80.11    8.15
   0   4   2   76.20    8.29
   0   4  -2   78.09   11.57
   3  -4  -1   19.54    3.16
  -3   4   1   24.24    4.26
  -3   4   1   33.89    7.27
   3   4   1   21.97    2.40
  -3   4  -1   23.91    5.78
   3   4   1   22.20    4.15
  -3  -4   1   23.73    5.24
   3  -4  -1   27.12    3.65
   3   4  -1   28.74    5.66
  -3  -4  -1   20.77    3.23
   3  -4   1   21.84    2.42
   3  -4   1   20.29    2.96
   0   1  -4    0.66    1.77
   0   1   4    0.83    1.45
   0   1  -4    1.92    2.92
   0   1   4    2.35    1.36
   0  -1  -4    0.76    0.73
   0  -1   4    2.60    1.72
   0  -1  -4    2.76    1.00
   6  -1  -2   40.29    5.83
   6   1  -2   45.56    9.74
  -6  -1  -2   42.91    7.46
   6  -1  -2   43.83    8.40
   6   1   2   34.46    6.71
   6   1  -2   38.24    5.77
   6  -1   2   49.67    9.52
   6   1   2   44.47    8.11
   6   1  -2   46.08    6.68
   6  -1   2   51.18    8.57
  -6   1  -2   49.27    9.64
  -6   1   2   43.12    7.92
  -1  -4  -2    1.85    2.07
  -1   4   2    0.88    1.08
   1   4   2    0.32    1.23
  -1   4  -2    2.16    1.66
  -1   4  -2    0.20    0.57
  -1   4   2    2.20    1.69
   1   4  -2    0.37    1.32
   1   4   2    1.16    1.13
  -1  -4   2    0.70    1.33
   1  -4   2    0.44    0.64
   1  -4  -2    1.55    0.99
   1  -4   2    1.35    1.34
   1  -4  -2   -0.00    1.59
  -1   1  -4   11.73    3.84
  -1   1  -4    2.64    1.87
   1  -1  -4    2.89    1.10
  -1  -1  -4    1.79    1.30
   1   1   4    4.98    2.56
  -1  -1   4    1.57    1.68
  -1   1   4    1.76    2.08
   1  -1   4    0.62    2.45
   1   1  -4    4.48    3.05
  -1  -1  -4    0.90    1.23
   1  -1  -4    1.93    1.45
   1   1   4    0.43    1.19
  -1   1   4    2.33    1.43
  -2   0  -4  263.73   16.16
   2   0  -4  288.96   17.84
  -2   0  -4  264.77   15.60
  -2   0   4  297.30   17.20
   2   0   4  308.45   20.24
  -2   0   4  325.56   19.33
  -2   0  -4  293.78   17.87
  -7  -1   0   -0.03    0.98
   7  -1   0    1.60    0.94
   7  -1   0    3.27    2.41
  -7   1   0    0.46    1.30
   7   1   0    1.23    1.46
   5   0  -3  302.58   17.61
   5   0   3  224.04   18.28
  -5   0   3  357.46   20.70
   5   0   3  253.85   16.68
  -5   0  -3  246.58   15.13
   2   3  -3    0.53    0.99
   2  -3  -3    0.10    1.04
  -2   3   3    1.75    1.68
   2   3   3    1.00    1.16
  -2   3  -3    0.47    1.25
   2   3  -3    1.14    2.15
  -2   3  -3    0.64    1.20
   2  -3   3    0.36    1.91
  -2  -3   3    1.78    1.08
   2   3   3    2.66    1.65
  -2  -3  -3    1.20    1.28
  -2   3   3   -0.55    1.63
   2  -3  -3    1.41    0.68
   4   2   3    1.44    0.96
   4   2  -3    2.48    1.24
  -4  -2   3    3.66    1.37
   4  -2   3    0.68    1.11
  -4   2   3    5.38    2.64
  -4   2  -3    0.58    1.52
  -4  -2  -3    3.84    1.58
   4   2  -3    7.01    3.11
   4  -2  -3    4.02    1.93
   4  -2  -3    1.96    1.26
   4   2   3    2.40    2.79
   4  -2   3    6.57    3.03
  -4  -2  -3    2.74    2.37
   7   0   1  180.53   15.14
   7   0  -1  190.03   15.20
   7   0  -1  159.52   14.02
  -7   0  -1  178.87   14.51
   7   0   1  195.22   15.57
   2  -4  -2   16.94    6.75
   2   4   2   12.81    2.24
   2   4   2   11.21    4.42
  -2  -4  -2   12.73    3.02
  -2  -4   2   12.28    2.77
   2  -4  -2   20.31    6.20
  -2   4  -2    8.22    3.11
  -2   4  -2   19.33    5.80
  -2   4   2   18.23    5.54
  -2   4   2   16.88    3.08
   2  -4   2   14.28    1.58
   4  -4   0   15.03    1.47
  -4   4   0   17.81    4.91
   4   4   0   17.62    2.88
  -4   4   0   17.85    3.12
   4  -4   0   15.74    3.98
  -4  -4   0   19.37    3.63
  -2  -1   4    7.82    3.27
  -2   1  -4    6.14    3.78
   2   1   4    5.06    3.78
  -2   1   4   10.55    5.63
   2   1  -4    9.97    7.76
   2  -1   4    7.88    4.44
  -2   1   4    7.81    3.97
  -2   1  -4    8.99    3.89
   2   1   4    6.84    3.15
  -2  -1  -4    5.44    2.64
   2   1  -4    5.90    2.90
   2  -1  -4    4.86    2.26
  -2  -1  -4    7.42    3.09
   2  -1  -4    6.83    3.09
   5   1   3   14.40    5.25
   5  -1  -3   10.99    4.49
   5   1  -3   11.98    3.37
   5  -1  -3   13.62    3.67
   5   1  -3   16.37    4.65
  -5   1  -3    9.32    3.52
   5  -1   3    6.20    5.33
   5   1   3    9.87    3.38
  -5   1   3   24.45    7.05
   5   1  -3   19.09    5.59
  -5   1  -3    7.07    3.90
  -5  -1  -3    9.18    4.67
   7  -1   1   78.91    7.90
   7  -1  -1   87.06   11.62
   7   1   1   83.48    9.07
   7   1   1   88.32    8.64
  -7   1  -1   86.36    8.51
   7   1  -1   91.30   10.11
  -7  -1  -1   79.80    7.77
  -7   1   1   88.46    9.28
   7  -1   1   87.39    9.29
   7   1  -1   83.46    8.81
   7   1  -1   89.31    9.16
  -3   0  -4    0.30    1.71
  -3   0   4    1.65    3.35
   3   0   4    2.51    2.30
  -3   0   4    0.42    0.98
  -3   0  -4   -0.23    1.80
   3   0  -4    0.98    1.12
   4  -4  -1    1.27    1.05
   4   4   1    0.58    1.02
   4  -4   1    1.67    1.02
   4   4  -1    2.47    1.13
   4  -4  -1    2.46    1.77
  -4   4   1    1.38    1.38
  -4  -4  -1   -0.02    1.33
   4  -4   1    0.42    0.99
   4   4   1    0.85    0.64
  -4   4  -1    0.21    1.41
  -4  -4   1    1.50    0.91
  -4   4  -1    1.12    0.83
   0  -2  -4  176.37   14.43
   0  -2   4  148.89   12.44
   0   2  -4  162.79   14.27
   0   2  -4  178.33   14.94
   0  -2  -4  166.95   13.77
   0   2   4  186.52   15.05
   0   2   4  175.21   14.27
   3   3   3    6.76    3.61
   3  -3  -3    7.05    3.62
  -3   3   3    8.12    4.14
  -3   3  -3    8.21    4.47
  -3   3  -3    9.02    3.81
   3  -3   3    8.71    3.72
  -3  -3  -3    7.53    3.12
   3  -3   3    1.95    1.91
  -3  -3   3    7.11    3.83
   3   3  -3    6.83    2.45
   3  -3  -3    7.14    3.00
   3   3   3    8.94    3.03
  -6   3   0   14.46    2.37
   6   3   0   15.44    4.72
   6  -3   0   18.66    6.28
   6  -3   0   15.15    3.44
   6   3   0   14.90    7.18
  -6   2  -2  269.43   15.41
   6   2   2  265.79   17.45
  -6   2  -2  265.65   16.10
   6  -2   2  268.21   16.64
   6  -2  -2  278.06   16.36
   6   2  -2  278.33   16.10
   6  -2   2  276.40   16.72
  -6  -2  -2  249.44   14.57
   6   2  -2  245.12   14.81
   6  -2  -2  269.79   16.58
   6   2  -2  261.01   15.27
   6   2  -2  285.45   16.67
  -6   2   2  290.40   16.90
   1   2   4    1.14    1.16
   1   2  -4    1.73    1.55
   1   2  -4    2.60    2.15
   1  -2   4    0.81    1.39
  -1  -2  -4    1.24    1.03
   1  -2  -4    1.63    1.78
  -1  -2  -4    1.43    1.64
   1  -2  -4   -0.13    1.18
  -1  -2   4    1.38    1.30
  -1   2   4    1.64    1.16
   1   2   4    1.96    1.95
  -1   2  -4    2.33    2.51
  -1   2  -4    0.72    1.20
  -5   3  -2    1.14    1.09
  -5  -3  -2    0.67    1.26
  -5  -3  -2    1.04    1.65
   5   3  -2    2.13    1.70
   5   3  -2    1.95    1.47
  -5   3  -2   -0.10    1.18
   5  -3   2    0.41    0.56
   5   3  -2    0.49    0.53
   5   3   2    1.04    1.52
   5  -3   2    1.49    1.57
   5  -3  -2    0.66    0.91
   5   3   2    0.84    0.69
   5   3  -2   -0.06    0.72
  -5   3   2    0.79    1.05
   3   4   2    1.12    1.54
   3   4  -2    0.56    1.43
  -3   4   2    0.46    0.98
  -3   4  -2    2.11    1.09
   3  -4  -2    1.26    1.11
   3  -4   2    0.47    0.59
   3  -4  -2   -0.09    1.68
  -3  -4   2   -0.42    0.67
  -3  -4  -2    1.77    3.43
  -3   4  -2   -0.34    1.45
   3   4  -2    0.03    0.93
  -3   4   2    0.93    1.77
   3   4   2    0.99    0.52
  -7  -2   0   -0.55    0.78
   7  -2   0   -1.37    1.90
  -7   2   0   -0.62    0.76
  -7   2   0   -0.74    1.30
   7   2   0    2.52    1.93
   7  -2   0    0.65    0.87
   7   2   0    1.55    1.01
   3  -1  -4    7.06    3.29
  -3   1   4    4.31    2.79
   3  -1   4    1.88    0.83
  -3  -1  -4    4.80    1.51
  -3   1  -4    4.24    3.71
   3   1  -4    7.37    5.03
   3   1   4    4.56    2.24
   3  -1  -4    4.29    2.02
   3  -1   4    6.55    3.96
   3   1   4    2.57    2.41
  -3  -1   4    2.09    1.63
  -3   1  -4    6.56    2.95
   3   1  -4    4.47    2.04
  -3  -1  -4    6.48    3.06
   0   5   0    0.75    0.91
   0  -5   0    0.62    1.04
   0   5   0    3.78    1.39
  -1   5   0   16.99    5.47
   1   5   0   15.02    4.52
   1   5   0   12.65    3.38
  -1   5   0   10.87    2.28
  -1  -5   0    8.65    3.48
   1  -5   0   10.12    3.37
   6   3  -1    0.14    0.84
  -6   3  -1    2.41    1.30
   6   3   1   -0.15    2.05
   6  -3   1    1.55    1.12
  -6   3   1    0.25    0.88
   6  -3  -1    0.45    0.87
   6   3  -1    0.47    1.92
   6  -3   1    2.06    2.25
   6  -3  -1    1.43    1.95
   6   3  -1    0.58    1.32
   6   3  -1    1.98    0.98
  -6  -3  -1    1.43    0.58
   2   2  -4   46.12    9.03
   2  -2   4   57.01    8.44
  -2   2  -4   51.59    8.36
  -2  -2   4   52.11    7.43
  -2   2   4   57.84    8.27
   2  -2  -4   59.42   10.12
  -2   2  -4   48.52    8.86
  -2  -2  -4   55.80    8.64
   2   2   4   54.05    7.53
  -2   2   4   58.46    8.39
   2   2   4   57.94    9.95
   2   2  -4   70.78    9.14
   2  -2  -4   56.88    8.17
  -2  -2  -4   53.44    8.48
   7   0  -2    2.23    1.21
   7   0   2   -0.98    1.83
  -7   0  -2    1.16    0.82
  -7   0   2    0.39    0.69
   7   0   2    1.69    1.82
   7   0  -2    0.68    1.37
   5   2   3   48.93    8.25
   5   2  -3   49.71    7.14
   5  -2  -3   69.97    9.89
  -5   2  -3   41.47    8.11
   5   2   3   40.69    6.47
  -5   2  -3   42.18    8.04
  -5  -2   3   50.75    6.79
  -5  -2  -3   39.33    9.73
   5  -2  -3   60.08    5.46
   5  -2   3   38.24    6.70
   5   2  -3   56.24   17.28
  -5   2   3   75.13    8.09
   7   2   1    7.70    2.73
   7  -2   1   12.14    4.74
   7   2  -1    9.87    3.01
   7   2  -1    8.88    2.11
   7   2  -1   11.27    4.28
  -7  -2  -1   10.87    2.56
   7  -2  -1   11.34    4.97
   7   2   1    3.21    2.28
  -7   2   1    8.33    3.90
  -7   2  -1    9.59    2.46
  -7   2  -1    9.20    4.78
   7   2  -1   10.21    2.79
   7  -2   1    9.08    3.56
   0   5   1    5.81    2.45
   0   5  -1    8.45    3.80
   0   5  -1    7.88    2.92
   0  -5  -1    5.88    2.99
   0  -5   1    6.20    2.21
   5  -4   0   -0.72    1.59
   5  -4   0    0.65    0.92
  -5   4   0    0.78    0.85
  -5  -4   0    0.71    1.12
   5   4   0    3.04    1.95
  -5   4   0   -0.28    1.04
  -1   5   1   11.30    4.16
  -1  -5  -1    6.53    4.94
  -1  -5   1   13.06    5.12
  -1   5  -1   27.14    5.27
   1   5  -1    9.27    2.28
  -1   5   1   12.06    6.42
   1   5   1   19.10    4.50
   1   5   1    3.78    1.70
   1  -5  -1   10.86    2.38
   1  -5  -1    8.02    5.06
   1  -5   1    9.30    4.43
   6   0   3    2.41    1.95
  -6   0   3    2.77    1.90
   6   0  -3   -0.57    1.45
  -6   0  -3    0.62    1.25
  -2   5   0   21.73    2.88
  -2   5   0   29.74    5.42
   2  -5   0   26.41    7.27
  -2  -5   0   23.82    5.13
   2   5   0   36.43    6.71
   2   5   0   22.57    4.19
  -2   5   0   37.67    8.11
   7   1   2   22.56    7.58
  -7  -1   2   16.81    5.50
  -7   1   2   17.03    3.60
   7   1  -2   11.88    2.33
   7  -1   2   14.62    4.26
   7  -1  -2   15.62    7.09
   7   1   2   12.82    4.09
  -7   1  -2   11.78    4.91
   7   1  -2   14.36    5.55
  -7  -1  -2   15.95    5.60
   7  -1   2   18.97    7.26
   7  -1  -2   14.33    3.02
  -4   0   4  759.43   22.69
   4   0  -4  658.10   17.81
  -4   0  -4  666.76   21.36
   4   0   4  603.12   19.11
  -4   0  -4  665.01   19.20
   4   0   4  682.79   20.03
   4  -3  -3    5.11    2.61
   4   3  -3    1.52    1.42
  -4   3  -3    3.01    2.65
   4   3   3    1.83    1.75
  -4   3   3    6.29    2.66
  -4  -3  -3    3.56    1.63
  -4   3  -3    2.12    1.96
   4   3   3    2.88    1.33
   4   3  -3    2.73    2.26
   4  -3  -3    1.10    1.59
  -4  -3   3    3.07    1.39
   4  -3   3    2.61    1.33
  -8   0   0  236.12   13.75
   8   0   0  256.78   14.76
   0   4   3    0.58    1.20
   0  -4  -3    0.07    1.13
   0   4  -3    0.74    0.82
   0   4   3   -0.55    1.35
   0   4  -3   -0.61    2.32
   0  -4   3    1.15    1.04
   6  -1   3    1.49    1.41
   6   1  -3    0.35    1.30
   6   1   3    7.34    3.06
  -6  -1  -3    3.67    1.42
  -6   1  -3    1.07    1.61
   6  -1   3    4.92    2.56
   6   1   3    4.58    2.22
  -6   1  -3    2.56    1.17
   6  -1  -3    2.40    2.02
   6   1  -3    4.19    2.08
   6   1  -3    1.40    2.08
  -6   1   3    0.51    1.09
   6  -1  -3    1.01    1.22
  -1   4  -3    3.17    2.71
   1  -4   3    5.27    3.41
   1   4  -3    6.97    3.39
  -1  -4   3    5.84    3.60
   1   4  -3    6.35    5.06
   1   4   3    5.09    6.16
  -1   4  -3    6.60    2.84
  -1  -4  -3    5.18    2.98
   1   4   3    4.39    2.14
  -1   4   3    6.05    2.43
   1  -4  -3    5.21    2.31
   4  -4  -2    5.46    2.82
  -4  -4   2    1.00    1.26
   4  -4  -2    4.13    1.82
   4   4   2    0.73    1.90
   4  -4   2    3.33    3.64
  -4   4   2    4.52    1.45
  -4   4  -2    2.71    1.28
  -4   4  -2    3.85    1.64
   4   4   2    2.91    1.12
  -4   4   2    5.81    2.62
   4  -4   2    2.53    1.53
   4   4  -2    6.84    3.02
  -4  -4  -2    4.66    2.40
   4   4  -2    4.81    1.54
  -5   4  -1    6.46    2.71
  -5   4  -1    8.48    2.82
   5  -4   1    6.16    3.06
   5  -4   1    7.47    3.53
   5  -4  -1    7.91    4.22
   5   4  -1    7.61    2.73
  -5  -4   1    9.36    3.39
   5  -4  -1   11.43    4.12
   5   4   1   10.41    4.41
   5   4   1    7.61    3.57
  -5  -4  -1    8.98    4.25
   5  -4  -1    6.25    1.98
  -5   4   1    8.67    3.10
   5   4  -1    9.82    3.30
  -4   1  -4  587.54   17.75
   4   1   4  656.64   18.52
   4   1  -4  670.34   18.90
  -4  -1   4  666.04   18.77
  -4  -1  -4  629.01   19.99
  -4   1  -4  650.93   19.73
   4  -1  -4  692.02   19.05
   4  -1   4  727.46   24.15
   2  -5   1    0.90    0.82
   2   5   1    0.18    0.89
   2   5  -1    1.39    0.94
  -2  -5  -1    1.95    1.89
   2   5   1    0.16    1.03
   2  -5  -1    0.86    2.14
   2   5  -1    0.55    1.66
  -2   5   1   -0.31    1.73
  -2   5  -1    1.08    0.66
   2  -5  -1    1.67    0.79
   2  -5   1    1.89    1.47
  -2   5  -1    0.01    1.06
  -2   5   1    0.57    1.11
  -2  -5   1    1.44    1.84
  -3  -2  -4   22.63    6.47
   3   2   4   16.03    4.20
   3  -2  -4   14.03    3.25
   3   2   4   12.82    2.78
  -3   2   4   18.99    6.25
  -3   2  -4   16.32    4.90
  -3  -2  -4   15.77    5.58
  -3  -2   4   16.97    6.47
   3  -2   4   13.65    4.20
   3  -2   4   15.98    7.71
   3  -2  -4   13.32    2.57
   3   2  -4   24.31    9.29
   3   2  -4   13.78    3.58
  -8  -1   0   42.46    7.19
   8   1   0   48.02    9.17
  -8   1   0   41.28    7.71
   8  -1   0   37.40    6.21
   8  -1   0   39.91    5.92
   8   1   0   35.04    5.52
   8   0   1    8.81    4.35
   8   0  -1    4.38    2.00
   8   0   1    1.96    4.38
  -8   0  -1    0.36    0.93
   8   0  -1   10.59    4.73
  -8   0   1    0.45    0.61
   3  -5   0    0.37    0.62
   3   5   0    0.88    0.80
   3  -5   0    0.60    0.89
   3   5   0    1.08    1.15
  -3   5   0    2.54    1.52
  -3  -5   0    0.85    1.12
  -3   5   0    0.03    0.65
  -2   4  -3    0.79    1.18
   2   4   3    2.21    1.64
   2   4  -3    1.33    1.78
  -2  -4  -3    2.17    1.56
  -2   4   3    0.81    0.84
  -2   4   3    1.74    1.44
   2   4   3    0.31    2.23
   2  -4   3    2.93    1.44
  -2  -4   3    1.88    1.43
  -2   4  -3    1.72    1.38
   2  -4  -3    1.88    1.02
  -2  -4  -3    2.94    2.97
   2   4  -3    2.92    2.10
   2  -4  -3    2.82    1.83
   2  -4   3    0.37    0.72
   0  -3  -4    0.92    1.51
   0   3  -4    0.60    2.06
   0   3  -4    1.04    2.98
   0   3   4    1.53    1.37
   0  -3   4   -0.07    1.71
   0  -3  -4    1.40    2.19
   0   3   4    1.73    1.51
  -6   3   2  219.96   18.14
   6  -3   2  176.58   14.32
  -6   3  -2  140.18   12.27
  -6  -3  -2  138.15   11.40
   6  -3  -2  164.03   14.25
   6   3  -2  144.10   13.14
   6   3  -2  158.38   12.88
   6   3  -2  194.13   18.94
   6   3  -2  218.32   17.66
   6  -3   2  171.87   15.20
  -1  -3  -4   16.96    6.16
   1  -3  -4   17.62    5.52
   1  -3  -4   16.09    5.31
  -1  -3  -4   15.21    5.72
   1   3  -4   14.31    3.79
  -1   3   4   12.35    1.97
   1   3   4   17.15    4.17
   1  -3   4   20.30    8.29
   1   3   4   17.08    5.33
  -1   3  -4   19.14    6.85
   1   3  -4   13.79   11.62
  -1  -3   4   13.82    3.40
  -1   3  -4   17.93    7.42
   8  -1   1   26.47    7.33
  -8  -1  -1   24.96    6.23
   8  -1  -1   16.10    2.90
   8   1  -1   17.15    3.67
   8   1   1   22.79   10.61
   8   1   1   23.91    3.45
   8   1  -1   29.89    5.17
  -8   1   1   18.17    3.61
  -8   1  -1   23.06    6.35
   8   1  -1   20.76    4.41
   7  -3   0    3.51    2.68
   7   3   0    2.97    1.91
   7   3   0    0.35    0.98
  -7   3   0    0.50    0.91
  -7  -3   0   -0.30    0.69
   7  -3   0    1.03    1.44
   7   2   2   15.59    6.05
   7   2  -2    2.46    1.61
  -7  -2  -2    3.15    1.38
   7  -2  -2    1.54    1.16
  -7   2  -2    3.27    1.03
   7   2  -2    7.97    4.62
  -7   2  -2    2.83    2.00
   7  -2  -2   14.13    4.85
   7  -2   2    2.68    1.76
   7   2  -2   10.78    3.01
   7  -2   2    5.81    3.11
   7   2   2    2.29    3.30
   7   2  -2    1.76    1.59
  -7   2   2    0.37    0.89
   0   5  -2    7.12    3.58
   0   5   2    0.03    0.81
   0   5   2    0.85    1.18
   0   5  -2    3.03    1.36
   0  -5  -2    0.20    1.11
   0  -5   2    0.32    1.11
   0  -5   2    0.41    1.10
   0  -5  -2    1.30    0.93
   3  -5  -1   11.57    4.76
  -3  -5   1   11.96    4.16
  -3  -5  -1    9.29    4.24
   3  -5   1   11.13    2.67
   3   5   1    4.61    2.47
  -3   5  -1    2.60    2.12
   3   5  -1   25.74    6.82
   3   5   1    7.00    2.71
   3   5  -1    4.11    1.88
  -3   5   1   15.24    3.79
   3  -5  -1   17.80    4.71
  -3   5   1   13.64    2.82
   3  -5   1    6.43    3.92
   1   5   2    6.40    2.95
   1   5   2    3.37    1.76
  -1   5  -2    6.03    2.92
  -1  -5   2    2.94    3.07
   1  -5  -2    7.50    2.91
  -1   5   2    4.27    1.80
  -1  -5  -2    6.81    6.10
   1  -5  -2    6.23    2.23
  -1  -5   2    8.62    4.52
   1  -5   2    6.80    3.69
   1   5  -2   12.49    4.14
   1  -5   2    7.01    3.80
  -1   5  -2    6.19    3.02
  -6   2   3   60.11    3.71
  -6   2  -3   53.11   10.78
   6   2  -3   58.21   12.67
  -6   2  -3   54.58    9.10
  -6  -2  -3   51.06    9.94
   6   2  -3   52.12    8.49
   6   2  -3   54.88    8.91
   6   2   3   60.14    9.14
   6  -2   3   51.09    8.04
   6  -2  -3   58.22   11.26
   6  -2  -3   61.43    9.57
   6  -2   3   52.37    8.88
   6   2   3   56.27    9.26
   6   2  -3   55.79    8.89
  -5   0  -4   -0.04    1.78
  -5   0   4   -1.46    4.10
   5   0  -4    2.09    1.26
   5   0   4    1.34    1.49
   5   0   4   12.54    6.17
   2   3   4  377.11   21.57
  -2   3   4  517.12   16.61
  -2   3  -4  419.01   26.11
   2   3  -4  484.00   29.02
  -2   3  -4  437.13   25.31
  -2  -3  -4  405.06   23.33
   2  -3  -4  417.23   23.86
  -2  -3  -4  426.15   24.37
   2   3  -4  488.26   28.44
   2  -3  -4  434.59   24.94
  -2  -3   4  395.30   22.64
   2  -3   4  411.62   24.77
   2   3   4  453.41   25.78
   4  -2  -4   25.87    5.88
  -4  -2  -4   27.02    4.91
   4   2  -4   29.97    5.12
  -4  -2  -4   27.21    5.08
  -4   2  -4   33.88   10.22
   4   2   4   25.18    2.88
  -4   2   4   26.53    7.04
   4   2   4   23.51    4.03
   4  -2   4   21.09    6.41
   4  -2   4   24.50    3.63
   4  -2  -4   26.46    7.63
  -4  -2   4   23.96    3.70
   5  -3   3   40.11    6.18
   5  -3   3   36.10    7.86
  -5   3  -3   45.07    9.33
   5   3  -3   34.41    5.87
  -5  -3  -3   45.27    6.98
   5   3  -3   40.04    6.43
   5  -3  -3   45.24    7.38
  -5   3  -3   42.50   10.05
  -5   3   3   46.53    7.75
   5  -3  -3   41.87    8.91
   3  -4   3   14.01    1.86
   3  -4  -3   13.13    3.20
  -3  -4  -3    8.23    4.38
  -3  -4  -3   12.35    3.40
  -3   4  -3   15.49    4.38
   3  -4  -3   14.63    2.80
   3   4  -3   15.08    5.16
  -3   4  -3   13.23    4.93
   3   4   3   14.50    2.38
  -3   4   3   22.05    6.80
  -3   4   3   14.63    2.81
   3   4   3   11.65    2.93
   3  -4   3   21.78    7.72
  -3  -4   3   12.99    3.40
   7   3  -1   51.07    7.87
  -7   3   1   54.39    8.75
  -7   3  -1   46.10    7.58
   7  -3   1   48.74    7.37
   7   3  -1   40.00    6.53
  -7  -3  -1   46.85    6.77
   7   3  -1   46.07    6.85
   7   3  -1   47.44   10.56
   7  -3   1   45.22    6.75
   7  -3  -1   41.93    7.55
  -8   2   0   54.40    8.78
   8   2   0   25.03    3.64
  -8   2   0   53.85    8.38
   8   2   0   44.73    8.12
  -8  -2   0   42.31    6.95
   8  -2   0   45.46    7.51
   8  -2   0   37.47    7.09
   6  -4   0   17.11    5.23
   6   4   0   11.21    3.11
  -6   4   0   15.32    2.62
   6   4   0   11.76    4.86
   6  -4   0   13.68    4.88
  -6  -4   0   15.43    4.23
  -6   4   0   21.09    4.84
   0   0  -5    0.34    0.75
   0   0  -5   -0.97    1.83
   0   0   5    0.53    1.29
   5   4  -2    0.72    1.92
   5  -4  -2   -0.02    1.31
  -5   4  -2   16.47    5.51
   5   4  -2    1.59    2.92
   5   4   2    0.46    1.05
   5  -4   2    4.86    2.79
   5  -4   2    7.15    3.02
   5   4  -2    0.21    0.44
  -5   4   2    0.33    0.65
  -5  -4  -2    3.42    1.64
  -5   4  -2    7.53    3.91
   5   4   2    1.42    2.09
  -5  -4   2    2.12    1.38
   5  -4  -2   -0.08    1.93
  -5   4   2    1.43    1.29
  -2   5  -2  189.70   15.08
   2  -5  -2  256.68   15.46
   2  -5  -2  253.49   16.49
   2   5   2  242.30   14.43
  -2  -5  -2  219.43   17.71
  -2  -5   2  251.10   15.44
   2  -5   2  240.79   14.12
  -2   5   2  264.12   17.06
   2   5  -2  270.09   16.67
  -2   5   2  302.87   17.67
   2   5   2  228.31    5.23
  -2   5  -2  229.25    5.74
  -5   1   4   -0.17    1.21
  -5   1  -4    2.98    2.31
   5   1   4    0.69    2.11
   5  -1   4    3.30    2.31
  -5  -1   4    1.66    1.22
   5   1   4    9.28    4.34
  -5   1  -4   -0.97    2.43
   5   1  -4    0.84    1.28
  -5  -1  -4    8.91    4.51
   5  -1  -4    2.29    1.57
   5  -1  -4    2.01    1.51
   5   1  -4    1.38    1.33
   5   1   4    0.36    2.10
  -4   5   0  172.65   13.93
   4   5   0  188.53   15.80
  -4   5   0  188.77   15.18
   4  -5   0  166.58   13.57
   4  -5   0  197.57   17.18
  -4  -5   0  172.14   14.69
   4   5   0  189.45   15.83
  -1   0  -5 1105.25   29.14
   1   0   5 1185.74   33.53
  -1   0  -5 1127.82   31.22
  -1   0   5 1296.61   36.04
   7   0  -3 1032.95   28.23
   7   0  -3 1129.21   30.73
  -8   0   2 2053.47   53.47
   8   0   2 1923.56   52.09
   8   0   2 1915.99   51.05
   8   0  -2 2015.05   53.42
  -8   0  -2 1971.13   51.60
   8   0  -2 2043.16   54.02
   0  -1  -5    5.57    3.10
   0  -1  -5    1.78    1.87
   0   1   5    3.73    2.47
   0   1  -5    3.74    2.21
   0   1   5    0.76    1.54
  -8   2   1   17.15    4.15
  -8   2  -1   12.39    2.68
   8   2  -1   10.85    3.04
  -8  -2  -1   16.62    4.81
   8   2  -1   10.32    5.82
   8  -2   1   16.61    6.91
  -8   2  -1   14.54    3.82
   8   2  -1   15.67    3.16
   8   2  -1   14.45    2.67
   8  -2   1   19.27    6.88
   8   2   1    3.84    2.02
   6  -4   1    0.43    1.67
  -6   4  -1    4.12    3.89
  -6  -4  -1    5.02    2.27
   6   4  -1   -0.07    1.67
   6  -4  -1    3.15    2.60
   6  -4  -1    0.66    0.73
   6   4  -1    1.39    1.23
  -6   4   1    1.57    1.93
   6   4   1    0.29    1.07
  -6   4  -1    5.72    4.23
  -1  -1  -5  560.37   16.76
   1  -1  -5  609.89   17.21
  -1  -1   5  616.99   18.79
  -1   1  -5  590.69   18.63
   1  -1   5  566.00   17.28
  -1  -1  -5  563.08   18.61
  -1   1  -5  523.89   19.70
   1   1  -5  530.45   18.32
  -1   1   5  530.96   15.54
   1  -1  -5  588.32   17.67
  -3  -3  -4    4.04    2.13
  -3  -3   4    2.18    2.39
   3  -3  -4    2.11    1.93
   3  -3   4    3.91    1.76
  -3   3   4    0.74    1.36
   3  -3  -4   -0.16    1.36
   3  -3   4    1.30    3.80
   3   3   4    3.00    1.99
   3   3  -4    3.10    1.30
  -3  -3  -4    1.63    1.62
  -3   3  -4    7.09    3.17
   3   3  -4    9.00    3.45
  -3   3   4    1.18    0.93
  -3   3  -4    5.83    3.02
   3   3   4    0.75    1.11
   4   5   1    0.83    0.89
   4   5  -1    0.63    1.40
  -4   5  -1    1.09    1.08
   4   5   1    2.62    2.22
   4  -5  -1   -0.25    1.25
  -4  -5   1    1.79    1.80
  -4  -5  -1    1.92    1.70
   4  -5  -1    6.40    3.45
  -4   5  -1    0.14    0.24
  -4   5   1    6.48    2.55
   4  -5   1    0.97    1.35
   4  -5   1    1.72    1.94
  -4   5   1    1.84    1.49
  -2   0   5    1.21    1.32
   2   0   5    0.43    2.04
  -2   0  -5    1.66    1.53
  -2   0  -5    0.67    1.17
   2   0  -5    1.67    1.70
  -2   0  -5   -0.67    4.07
  -2   0   5    1.00    1.27
  -7   1   3   56.71   10.74
   7   1  -3   45.53    8.69
   7  -1   3   58.56    8.80
  -7   1  -3   59.38   12.33
  -7  -1   3  118.06   14.49
  -7  -1  -3   38.47    7.03
   7  -1  -3   41.73    6.95
   7  -1  -3   75.81    8.86
   7   1  -3  104.47   10.37
   7  -1   3   51.51   10.11
   7   1   3   37.64   13.04
  -8   1  -2  663.65   18.94
  -8  -1  -2  621.77   17.62
   8  -1   2  619.85   18.24
  -8   1   2  660.03   19.26
  -8  -1   2  622.25   17.77
   8  -1  -2  653.56   19.06
   8  -1  -2  633.11   18.89
   8   1  -2  628.86   18.42
   8   1   2  594.18   20.94
   8  -1   2  586.20   17.54
   8   1  -2  646.20   17.41
   3   5  -2   29.00    7.78
  -3   5  -2   11.18    4.95
  -3   5   2   23.78    7.87
  -3   5  -2   10.57    4.49
   3   5   2    8.43    2.90
  -3   5   2   19.08    6.38
   3  -5  -2   25.35    8.56
   3  -5   2    9.84    5.07
  -3  -5  -2   12.93    5.46
  -3  -5   2   10.13    2.72
   3  -5  -2   13.83    6.04
   3  -5   2   13.49    7.90
   3   5   2   11.35    3.90
   4  -4  -3    5.37    2.67
   4   4   3    3.99    1.52
  -4   4  -3    3.79    1.81
   4   4  -3   13.13    4.79
   4   4  -3    3.73    1.71
  -4  -4  -3    3.12    1.25
   4  -4   3    4.45    1.50
   4  -4  -3    7.87    3.98
  -4  -4   3    6.75    2.28
  -4   4  -3    7.41    3.03
   4   4   3    4.59    3.10
  -4   4   3    3.91    2.75
  -4   4   3    4.97    1.99
  -4  -4  -3    5.77    2.90
   2   1   5   12.04    4.94
   2   1  -5    9.38    4.67
  -2   1   5    6.22    3.85
   2  -1   5   10.03    3.99
   2  -1  -5    9.03    4.09
  -2  -1  -5   11.67    3.27
  -2   1  -5   13.84    4.10
   2   1   5    6.28    3.66
  -2   1  -5   10.37    7.32
   2   1  -5    5.58    3.05
  -2  -1  -5    8.29    4.74
   2  -1  -5    7.68    4.11
  -2   1   5   11.24    4.31
  -9   0   0   -0.17    1.47
   9   0   0    0.37    0.64
   5   2   4    5.05    2.98
  -5   2   4    9.50    4.83
   5  -2  -4    8.01    4.65
  -5  -2  -4    8.06    2.90
  -5  -2   4   10.25    3.49
   5  -2   4    8.44    3.21
   5  -2  -4    7.36    3.13
   5   2  -4    7.23    3.21
  -5  -2  -4    5.55    3.29
   5  -2   4   11.56    3.49
  -5   2  -4    7.84    3.05
   5   2   4    4.13    3.11
  -5   2  -4    3.76    1.66
   5   2  -4   16.53    5.61
  -7  -3  -2   30.06    6.84
   7   3  -2   26.25    3.47
   7  -3  -2   28.44    3.75
   7  -3   2   27.51    7.54
   7   3  -2   27.97    3.59
   7   3  -2   28.12    4.31
  -7   3   2   36.59    6.74
   7  -3  -2   25.26    4.57
   7   3   2   40.07    7.67
  -7   3  -2   25.56    4.15
   7   3  -2   27.85    4.50
   7  -3   2   28.38    4.07
  -3   0   5  733.12   21.04
  -3   0  -5  823.56   23.82
  -3   0  -5  698.07   22.00
   3   0  -5  768.62   21.90
   3   0   5  681.89   20.88
  -3   0   5  781.09   22.74
   0  -2   5   16.39    6.87
   0  -2  -5   -0.27    1.32
   0   2   5    0.65    1.39
   0  -2  -5    0.82    0.59
   0   2  -5   -0.66    2.61
   0   2   5    0.51    1.15
   0   2  -5    1.76    1.95
   6   0   4 1520.08   42.02
   6   0   4 1798.45   49.08
  -6   0  -4 1614.12   42.84
  -6   0  -4 1707.53   45.91
   6   0  -4 1778.10   46.54
  -9  -1   0   -0.69    1.43
   9   1   0    1.41    3.57
   9  -1   0    1.02    1.12
   9  -1   0   -0.43    2.10
  -9   1   0    0.94    1.09
   9   1   0   -0.98    1.52
   5  -5   0    1.52    1.46
  -5   5   0    1.56    1.30
  -5   5   0    0.56    0.68
   5   5   0    1.41    1.35
  -5  -5   0    1.47    1.65
   5  -5   0    0.84    1.03
  -6   3   3    4.48    1.85
   6   3   3    0.07    0.82
   6  -3  -3    7.61    2.58
   6  -3   3    6.38    3.07
  -6  -3  -3    3.80    2.34
   6   3  -3    3.86    1.36
  -6   3  -3    4.24    1.60
  -6   3  -3    2.14    1.04
  -6  -3  -3    3.74    2.06
   6   3  -3    4.83    3.59
   6   3  -3    8.40    3.72
   6  -3  -3    8.26    3.59
   6   3  -3    7.84    4.38
   6  -3   3    0.64    2.62
   9   0  -1 1086.95   31.45
  -9   0  -1 1111.57   29.81
  -1   2  -5   46.01    7.61
  -1  -2   5   37.26    6.06
   1  -2   5   38.45    7.94
   1   2   5   45.34    7.73
   1  -2  -5   39.10    6.63
  -1  -2  -5   33.72    5.85
   1   2  -5   39.65    9.12
  -1   2   5   45.72    7.42
   1   2   5   44.83   12.50
  -1   2  -5   33.71    6.84
   1   2  -5   37.59    8.27
  -1  -2  -5   39.17    8.31
   1  -2  -5   39.38    6.15
   4   3  -4   13.11    5.21
   4  -3   4   16.00    5.30
  -4   3  -4   24.83    8.07
   4  -3  -4   12.23    3.27
  -4  -3  -4   15.40    5.83
   4   3  -4   14.44    4.05
   4  -3  -4   16.99    5.27
  -4  -3  -4   14.78    7.11
   4   3   4   11.99    3.13
  -4   3  -4   27.24    8.51
   4  -3   4   11.39    7.03
  -4   3   4   22.19    7.30
   4   3   4   10.35    2.99
  -4  -3   4   10.64    5.09
   0  -6   0 1872.45   49.43
   0   6   0 1821.69   48.02
   0   4  -4  110.68   13.22
   0  -4  -4   74.34    7.63
   0   4   4   77.37    7.86
   0   4   4  103.24   10.33
   0  -4   4   68.08    7.47
   0  -4  -4   75.15    8.51
   0   4  -4   76.13    9.04
   7   2  -3    6.26    2.51
   7  -2   3    0.33    2.46
   7  -2  -3    4.11    3.56
   7  -2   3    5.71    3.14
   7   2  -3   35.38    8.29
   7  -2  -3    3.51    3.32
   7   2   3    5.70    4.07
   7   2  -3    4.74    2.08
  -7  -2  -3    5.56    4.05
  -7   2  -3    7.66    5.31
   7   2  -3   41.64   11.59
  -7   2  -3    4.04    1.94
  -7   2   3    3.16    3.24
  -3  -1  -5  489.75   28.65
   3  -1  -5  519.21   14.99
   3  -1   5  463.25   27.59
  -3   1  -5  518.88   16.38
   3   1  -5  556.67   16.97
  -3   1  -5  469.78   27.60
  -3  -1  -5  527.14   15.24
   3  -1   5  534.11   17.23
   3   1   5  576.29   17.31
   3   1   5  560.09   16.64
   3  -1  -5  577.63   18.07
  -3  -1   5  509.64   15.59
   8   3   0  339.28   19.77
  -8   3   0  284.01   16.31
  -8  -3   0  295.29   16.78
   8  -3   0  282.43   16.59
   8  -3   0  313.17   19.35
   8   3   0  291.97   19.34
   0   5  -3    2.75    2.84
   0   5   3    2.35    1.68
   0   5   3   17.60    4.22
   0   5  -3    2.30    2.23
   0  -5  -3    3.22    1.35
   0  -5   3    2.80    1.58
   0  -5   3    3.22    1.63
   0  -5  -3    3.65    1.84
   8  -2  -2  176.03   15.24
  -8   2   2  147.70   12.12
  -8  -2  -2  144.90   12.16
   8   2   2  166.82   13.77
   8  -2   2  173.57   15.03
   8   2  -2  149.57   13.07
   8  -2   2  162.48   15.95
  -8   2  -2  144.01   11.87
   8  -2  -2  150.81   14.29
   8   2   2  116.11   11.14
  -8   2  -2  135.82   11.68
   8   2  -2  150.46   12.58
   6   4  -2   18.76    8.19
  -6  -4  -2   22.13    8.63
   6   4  -2   15.01    3.99
   6  -4  -2   15.93    5.26
  -6   4   2   16.67    3.22
   6   4  -2   15.08    2.80
  -6   4  -2   15.49    3.20
   6  -4   2   13.28    2.22
  -6   4  -2   12.79    4.61
  -6  -4  -2   17.26    5.03
   6   4   2   15.26    2.45
   6  -4  -2   18.42    6.11
   6  -4   2   15.75    3.07
   6   4   2    2.30    3.66
   1  -6   0   32.66    7.44
  -1   6   0   39.50    8.93
  -1   6   0   29.55    5.26
   1   6   0   48.20    8.73
   1   6   0   36.04    7.70
  -1   6   0   51.61    9.23
  -1  -6   0   25.93    7.79
   6   1   4  270.69   15.63
  -6   1  -4  256.44   16.43
   6   1   4  240.42   16.70
   6   1   4  319.95   20.85
  -6  -1  -4  243.18   15.76
   6  -1  -4  380.97   23.14
   1  -4   4    2.58    2.19
   1  -4  -4    2.50    1.39
  -1  -4  -4    3.27    3.49
   1   4  -4    1.67    1.40
  -1   4   4    0.89    1.54
  -1  -4  -4    1.58    2.01
  -1   4   4    2.92    2.08
   1   4   4    2.73    1.96
  -1   4  -4    2.59    2.56
   1  -4  -4    2.53    2.16
   1   4   4    1.93    3.31
  -1  -4   4    2.48    1.92
  -1   4  -4    2.50    2.70
   1   4  -4    1.13    1.27
   1  -5   3  281.18   18.06
  -1  -5   3  299.01   17.29
   1   5   3  299.35   18.72
   1   5  -3  380.18   22.37
  -1   5  -3  371.99   21.84
   1  -5   3  322.33   19.21
   1  -5  -3  320.61   18.90
  -1  -5   3  342.17   19.41
  -1  -5  -3  285.52   16.74
  -1   5   3  355.88   20.60
   1   5  -3  332.21   19.34
   1   5   3  348.33   20.08
   9  -1   1   33.49    5.64
   9   1   1   40.81    6.40
  -9  -1   1   36.32    6.71
  -9   1   1   39.94    6.25
   9  -1   1   40.95    9.10
   9   1  -1   47.59    9.28
  -9   1  -1   35.86    6.34
   9   1   1   35.81    6.67
  -9  -1  -1   34.68    6.12
   9  -1  -1   38.44    7.03
   9   1  -1   25.31    5.91
   4  -5   2  386.89   22.30
   4  -5  -2  364.11   22.04
  -4  -5  -2  346.18   20.21
  -4   5   2  466.07   26.49
   4   5  -2  389.42   23.52
   4   5   2  339.22   19.59
  -4  -5   2  380.86   21.66
   4   5   2  319.26   19.39
   4  -5   2  379.80   22.11
  -4   5   2  473.31   27.23
  -4   5  -2  329.92   19.21
   4  -5  -2  432.22   25.29
   4   5  -2  416.94   24.27
  -4   5  -2  332.12   19.58
  -7  -4   0    0.61    0.78
  -7   4   0   -0.59    1.07
   7  -4   0    1.01    1.63
  -7   4   0   -0.12    1.28
   7   4   0    1.98    1.53
   7  -4   0    1.42    1.70
   7   4   0   -0.03    1.14
   7   4   0   -0.51    2.37
   5  -5  -1  207.27   17.40
  -5   5   1  195.41   15.92
   5   5   1  180.86   14.95
  -5   5  -1  181.76   14.60
   5  -5   1  193.09   15.89
   5  -5  -1  196.03   15.87
   5  -5   1  205.88   16.76
   5   5  -1  197.32   16.27
   5   5  -1  199.11   16.33
  -5   5  -1  185.30   14.79
   5   5   1  174.03   14.92
  -5  -5  -1  208.28   17.25
  -5  -5   1  175.88   14.76
  -2  -2   5    1.21    1.67
   2  -2  -5    1.57    2.05
  -2   2  -5    3.95    2.64
  -2  -2  -5    3.81    1.88
   2   2   5    1.71    1.34
   2   2  -5    4.57    3.43
   2   2   5   -0.07    0.86
   2  -2  -5   -0.09    1.00
  -2   2   5   -0.07    1.01
   2   2  -5    0.80    1.23
  -2  -2  -5    1.12    1.23
  -2   2   5    0.47    0.43
   2  -2   5    2.40    2.69
   0   6   1   20.77    4.20
   0   6  -1   14.50    3.84
   0   6  -1   15.24    6.16
   0   6   1   11.41    4.03
   0  -6  -1   19.57    3.90
   0  -6   1   11.69    3.62
   8   3  -1   11.62    4.27
   8   3   1   16.33    5.30
   8  -3   1   12.09    5.00
   8  -3  -1   31.72    5.05
   8   3  -1   15.98    4.04
   8  -3   1   13.41    3.90
   8   3  -1   10.51    4.29
   8   3   1    1.58    2.34
   8   3  -1   12.53    4.10
  -8   3   1    2.51    1.58
  -8   3  -1   10.82    3.61
   1   6   1  236.12   15.01
  -1  -6  -1  231.07    7.93
   1  -6  -1  236.95   15.41
  -1  -6   1  220.54   18.34
   1  -6  -1  249.44   14.55
  -1   6  -1  276.13   17.51
   1   6   1  269.43   15.87
   1   6  -1  237.92   16.23
   1  -6   1  232.37    9.79
  -1   6   1  253.89   18.07
  -2   6   0  390.12   22.76
  -2   6   0  364.03   22.65
   2  -6   0  351.53   22.42
  -2   6   0  310.74   17.61
  -2  -6   0  343.54   19.98
   2   6   0  335.28   20.07
   2   6   0  394.45   23.91
  -2   4  -4   19.03    5.55
   2   4   4   16.70    2.85
  -2   4   4   26.95    4.65
   2   4   4   19.64    7.17
   2  -4   4   14.34    2.98
  -2  -4  -4   16.68    5.84
   2  -4  -4   20.83    6.33
   2   4  -4   12.84    4.38
  -2  -4  -4   10.91    6.68
   2  -4  -4   16.77    7.08
  -2   4  -4   25.35    7.36
   2   4  -4   20.71    8.66
  -2   4   4   17.77    6.80
  -2  -4   4   13.42    3.39
   5   4  -3   78.96    9.29
   5   4   3   97.00   11.27
   5  -4   3   60.40    3.84
   5  -4  -3   65.24   10.43
   5  -4   3   63.68    6.62
  -5  -4   3   72.15    8.42
  -5   4  -3   64.97    8.31
  -5  -4  -3   59.47    8.55
  -5   4   3   88.38   12.48
   5  -4  -3   71.06    8.14
   5   4  -3   61.07    4.14
   5   4   3   64.73    6.94
  -5  -4  -3   50.40    7.73
  -5   4  -3   65.03    8.41
   5   4  -3   72.94   12.25
  -2   5  -3   12.52    7.04
  -2   5   3    9.90    3.48
   2  -5   3   10.08    3.37
  -2   5  -3    2.02    6.79
   2   5   3   11.02    2.86
   2  -5  -3   13.33    2.72
   2   5   3   10.48    3.65
  -2  -5  -3   15.55    2.95
  -2  -5   3    9.74    3.71
  -2   5   3    8.89    7.49
  -2  -5   3   11.37    3.46
   2  -5   3   13.24    4.99
   2   5  -3   10.63    3.83
  -2  -5  -3   13.57    4.79
   7   4  -1   27.84    4.30
   7   4  -1   33.89    7.44
   7  -4   1   26.41    3.72
   7   4   1   32.84    6.90
  -7   4   1   33.88    7.29
   7   4  -1   31.93    9.48
  -7   4  -1   30.50    6.91
   7  -4  -1   23.50    2.85
   7   4   1   24.52    2.75
  -7   4  -1   20.56    3.77
   7  -4  -1   24.33    3.32
   7  -4   1   27.32    5.32
   7   4  -1   24.90    3.93
   4   0  -5    0.60    1.48
  -4   0  -5   -0.27    2.54
   4   0  -5    0.29    0.66
   4   0   5   11.60    3.65
  -4   0   5    0.93    1.18
  -4   0  -5    3.32    2.18
   4   0   5   -0.40    3.30
  -4   0   5    2.87    2.23
   9   2   0   -0.36    1.86
  -9   2   0    0.21    0.85
   9  -2   0   -0.85    2.26
   9   2   0    1.54    1.85
   9  -2   0    3.91    2.84
  -9  -2   0    0.69    0.80
   8   0  -3   -0.04    1.59
   8   0   3    4.32    2.37
  -8   0   3    0.02    0.95
   8   0  -3   -0.03    1.72
   8   0   3    0.70    1.35
  -8   0  -3    1.21    1.37
   2  -6   1   27.07    3.50
   2   6  -1   36.87    8.77
  -2   6   1   50.08    9.49
   2   6   1   16.79    4.61
  -2  -6   1   28.04    7.08
   2   6   1   29.02    8.78
  -2   6   1   47.35   10.21
   2  -6   1   24.64    5.72
  -2  -6  -1   21.92    5.24
   2   6  -1   53.81   12.69
  -2   6  -1    9.29    2.74
  -2   6  -1   18.09   10.82
   2  -6  -1   29.11    9.35
  -4  -1  -5   20.36    7.72
   4   1  -5   19.32    5.25
  -4   1  -5   16.55    5.94
  -4   1   5   21.74   13.25
   4   1   5   19.19    7.41
  -4   1  -5   15.95    7.15
   4   1   5   16.55    7.42
   4  -1  -5   19.88    6.11
  -4   1   5   24.05    8.18
   4  -1   5   11.20    5.83
   4  -1   5   15.50    6.04
  -4  -1  -5   14.73    2.77
   4   1  -5   30.61   15.66
   4  -1  -5   19.69    4.22
  -4  -1   5   19.31    4.99
  -3  -2   5  163.59   13.58
   3   2  -5  232.80    6.30
  -3   2   5  223.09   17.58
   3   2   5  201.31   16.38
  -3  -2  -5  170.49   17.29
   3  -2   5  218.09   19.01
   3   2   5  218.85   17.69
  -3  -2  -5  161.20   13.25
   3  -2   5  139.43   13.50
  -3   2  -5  160.11   15.19
   3   2  -5  261.45   24.14
   3  -2  -5  177.78   14.50
   3  -2  -5  184.77   15.19
  -3   2   5  232.73    9.64
   6   2   4  903.18   25.40
   6  -2  -4  835.25   23.78
   6   2  -4  816.20   22.26
   6   2   4  835.18   24.53
  -6  -2  -4  754.07   22.41
  -6  -2   4  809.08   21.70
  -6   2  -4  704.47   20.82
   6   2   4  804.67   21.65
   6   2  -4  811.42   22.75
   6  -2  -4  912.01   26.40
   6   2  -4  822.88   24.61
   6  -2   4  692.55   20.69
   9   0  -2   -1.23    1.99
  -9   0  -2   -0.18    1.75
   9   0   2    0.99    1.36
  -9   0   2    0.68    0.96
   9   0   2   -0.69    2.63
   9   0  -2    0.99    1.46
  -8   1  -3    1.79    1.64
  -8  -1   3    1.93    1.69
   8  -1   3    0.82    3.23
  -8   1   3    0.77    1.21
   8   1  -3    8.68    4.87
   8  -1  -3    0.63    1.78
   8   1   3    5.53    7.22
  -8  -1  -3    3.52    1.66
   8   1  -3    1.61    0.94
   8  -1  -3    4.94    2.42
   8   1  -3    0.60    1.24
   8   1   3    3.94    2.97
  -5   3   4   16.06    5.55
   5  -3   4    6.65    2.77
   5   3   4    8.04    3.19
   5  -3  -4    7.38    3.88
   5   3  -4    9.17    3.77
   5  -3   4    7.76    4.25
  -5  -3   4    8.88    4.01
  -5  -3  -4    4.13    1.85
  -5   3  -4    5.27    3.48
   5   3  -4   12.16    5.02
  -5   3  -4   13.71    3.84
   5   3   4    6.79    4.60
  -5  -3  -4    8.01    3.44
   5  -3  -4   11.57    3.34
   9   2  -1  179.25   14.83
  -9   2  -1  182.56   14.76
   9  -2   1  200.97   16.54
   9   2  -1  184.15   15.67
   9  -2   1  215.74   17.55
  -9   2   1  202.91   16.40
  -9   2  -1  173.58   13.60
   9   2  -1  173.57   14.34
  -9  -2  -1  177.00   14.30
  -3   6   0   37.07    6.42
  -3  -6   0   22.88    6.69
   3   6   0   44.40    7.35
   3   6   0    7.70    3.82
   3  -6   0   40.22    9.20
  -3   6   0    3.13    1.60
  -3  -4  -4   18.12    6.11
  -3  -4  -4   15.98    6.83
   3   4  -4   17.95    5.44
  -3   4  -4   14.50    6.39
   3  -4  -4   18.87    6.00
   3  -4  -4   15.44    3.71
   3  -4   4   14.02    5.75
  -3  -4   4   22.53    4.11
   3  -4   4   11.01    7.39
   3   4   4   29.28    8.24
  -3   4   4   29.78    6.93
   3   4   4   20.03    4.05
  -3   4   4   16.40    5.05
  -3   4  -4   18.97    6.31
  -3   5  -3    7.53    2.52
  -3  -5   3    8.80    2.48
  -3   5  -3    3.29    3.50
  -3  -5  -3    5.92    2.31
  -3  -5   3   20.52    5.20
   3   5   3   12.70    5.11
  -3   5   3    9.97    3.36
  -3   5   3   18.55    6.78
   3  -5  -3   16.79    4.25
   3   5  -3   10.71    2.82
   3   5  -3   28.32    8.20
  -3  -5  -3    6.89    3.07
   3   5   3    4.45    1.53
   3  -5   3    5.38    2.48
   6  -5   0    0.86    1.02
  -6  -5   0    2.88    2.58
  -6   5   0    1.99    1.61
   6   5   0    1.47    1.07
  -6   5   0    3.05    2.02
   0   3   5   -0.28    1.72
   0   3  -5    1.57    2.52
   0  -3  -5    1.86    1.79
   0   3  -5   -0.92    2.73
   0  -3   5   -0.07    1.80
   0   3   5    0.48    1.16
   9   1   2   16.28    6.53
   9  -1   2    9.94    2.63
   9   1   2   17.24    8.93
   9   1  -2   16.86    2.96
   9   1  -2   24.64   10.44
   9  -1  -2   16.34    3.16
  -9   1   2    9.18    3.79
  -9  -1   2   14.96    3.58
  -9   1  -2   13.71    2.83
   9  -1   2   19.03    5.93
  -9  -1  -2   18.26    4.96
   9   1  -2   20.61    7.46
  -5   5   2    7.08    2.53
   5  -5  -2    7.86    3.74
  -5   5  -2   -0.82    1.45
   5   5  -2    2.11    1.01
   5   5   2    0.50    1.06
  -5   5  -2    1.12    1.67
  -5   5   2    5.55    5.44
   5   5  -2   22.31    5.15
  -5  -5  -2    3.57    2.40
   5  -5   2    5.02    5.13
   5   5   2    0.01    3.23
  -5  -5   2    5.34    2.95
   5   5  -2    3.81    1.83
   5  -5  -2   26.84    7.91
   5  -5   2    8.38    4.58
   1  -3  -5  104.29   10.43
  -1  -3  -5   91.72   12.00
  -1   3   5  101.80   10.05
  -1   3  -5   88.71   15.85
  -1   3  -5  104.94   14.44
   1   3  -5   87.34   13.84
   1   3  -5   93.24   11.83
  -1  -3  -5   99.54   12.30
   1   3   5  100.33    9.92
   1   3   5   95.43    9.92
  -1   3   5  102.38    9.96
  -1  -3   5   91.54    9.51
   1  -3   5   86.95   11.03
   1  -3  -5   91.39   10.96
   0  -6   2 1722.80   45.24
   0  -6  -2 1749.85   46.75
   0  -6   2 1884.38   49.54
   0  -6  -2 1687.22   43.83
   0   6  -2 1869.38   49.88
   0   6   2 1692.89   44.93
   7   0   4    2.06    2.08
  -7   0  -4    2.67    1.28
  -7   0   4    1.39    1.79
  -7   0  -4    0.06    1.58
   7   0  -4    0.75    1.19
  -3   6   1 1831.32   48.17
   3   6   1 1753.35   46.85
  -3   6   1 2030.22   53.57
   3   6  -1 1761.95   46.75
   3   6  -1 2013.61   53.49
   3  -6   1 1869.51   49.85
   3   6   1 1845.49   49.21
   3  -6  -1 1922.98   52.19
  -3  -6   1 1793.65   47.32
  -3  -6  -1 1743.63   46.47
  -3   6  -1 1745.77   46.97
   7   3   3  169.61   14.27
   7  -3  -3  164.97   13.88
  -7  -3  -3  145.00   12.50
   7   3  -3  163.35   13.43
  -7   3  -3  177.48   14.38
   7  -3  -3  164.51   15.04
  -7   3   3  170.47   14.00
   7   3  -3  148.59   15.73
   7   3  -3  165.20   13.45
   7   3  -3  159.71   13.24
   7  -3   3  169.34   14.17
   7   3   3  185.22   15.77
   7  -3   3  187.65   15.80
   8  -3  -2   89.15   12.92
   8  -3   2   79.80    9.08
   8  -3  -2   73.80    8.68
   8   3  -2   74.26   10.68
   8   3   2   84.02    9.34
   8   3  -2   80.37    9.49
   8  -3   2   81.31    8.57
  -8  -3  -2   80.67    8.46
  -8   3  -2   77.64    8.96
   8   3  -2   63.82    7.86
   8   3   2   96.15    9.82
  -8   3   2   87.94   11.24
   8   3  -2   81.89    8.79
   1  -6  -2    5.80    2.60
   1  -6   2   17.33    3.29
  -1  -6  -2   11.75    4.23
   1  -6  -2    8.97    3.93
  -1   6  -2    0.84    1.38
  -1  -6   2    8.16    3.16
   1  -6   2   18.54    7.45
  -1   6   2    2.93    1.88
  -1   6  -2    6.94    2.80
  -1  -6  -2   10.58    1.69
   1   6   2    5.12    3.85
   1   6   2   15.55    5.27
  -6   5  -1    3.19    1.27
   6  -5   1    4.14    2.16
  -6  -5  -1    2.66    2.12
   6  -5  -1    4.30    4.72
   6  -5   1    1.64    1.23
   6  -5  -1    4.35    2.49
  -6   5  -1    1.73    1.12
  -6  -5   1   10.66    5.45
   6   5   1    1.33    2.20
  -6   5   1    3.74    2.43
   6   5  -1    1.70    1.85
   6   5  -1    2.02    3.28
   7   4   2   25.81    3.99
   7   4  -2   20.93    4.20
  -7   4  -2   26.06    6.61
  -7  -4  -2   25.94    4.88
  -7   4  -2   19.76    4.26
   7   4  -2   24.45    4.43
   7  -4   2   17.80    3.12
   7   4  -2   23.90    3.68
   7  -4   2   27.76    9.38
   7   4  -2   29.01    7.93
  -7  -4  -2   31.51    8.10
   7  -4  -2   26.97    4.71
  -7   4   2   28.75    7.43
   7   1   4   85.00   15.05
  -7  -1   4   90.27   12.90
   7   1   4   64.12    6.64
  -7   1  -4   57.84   11.71
  -7  -1  -4   59.35    8.66
  -7  -1   4   75.07    7.19
   7   1   4   64.14   13.24
   7  -1  -4   95.86   10.96
  -7   1  -4   78.75   15.37
   7   1  -4   92.19   10.01
   7  -1   4   58.09   11.85
   7   1  -4   80.97    8.54
   7  -1  -4   82.95   11.70
  -7   1   4   77.35   15.11
  -5   0   5   15.39    4.62
  -5   0   5   46.25   12.04
  -5   0  -5   15.15    5.93
   5   0  -5    7.20    2.86
  -5   0  -5    4.93    2.75
   5   0   5    8.34    5.01
   5   0   5   11.81    3.11
   2   3  -5  103.65   14.64
   2   3  -5   86.84   11.90
  -2  -3  -5   78.71   10.59
  -2   3  -5   68.86   12.90
   2   3   5   69.32    7.18
  -2   3  -5   80.12    9.45
   2  -3  -5   74.75   11.08
   2  -3   5   83.58    9.75
   2   3   5   70.29    7.53
  -2   3   5   77.67    9.14
  -2  -3   5   78.30    8.22
   2  -3  -5   81.94    8.93
  -2  -3  -5   77.78    8.77
   4  -2  -5   67.40    9.19
   4   2   5   55.11    7.92
   4  -2   5   56.99   10.96
  -4  -2  -5   56.23    8.52
  -4  -2   5   64.13    7.21
   4  -2   5   59.52    9.75
   4  -2  -5   60.46    6.68
  -4  -2  -5   64.77    8.10
  -4   2  -5   67.99   14.14
  -4   2   5   60.43    7.05
  -4   2   5   51.34    7.79
   4   2   5   70.86    7.35
   4   2  -5   65.40    8.59
   8  -2  -3   20.71    4.12
   8   2   3   20.31    4.08
   8   2  -3   18.92    2.91
  -8   2   3   23.32    5.80
   8  -2   3   27.15    8.42
   8   2  -3   25.13    7.60
  -8   2  -3   22.13    3.68
  -8  -2  -3   20.60    6.25
   8   2  -3   18.33    3.49
   8  -2   3   21.60    6.54
  -8   2  -3   24.12    8.96
   8   2   3   32.15    7.85
   8   2  -3   22.19    8.06
   8  -2  -3   23.89    4.25
  10   0   0  364.88   20.83
 -10   0   0  331.98   19.03
   6  -4   3   -0.06    2.23
   6   4  -3    1.68    1.41
   6   4   3    2.22    1.92
  -6   4  -3    8.59    3.67
  -6  -4  -3    0.73    1.24
  -6   4  -3    6.22    3.15
   6   4   3   -0.08    1.01
  -6   4   3   -0.96    1.40
   6  -4  -3    3.81    1.93
   6   4  -3    2.09    1.58
   6   4  -3   15.92    5.01
   6  -4  -3    1.43    1.14
   6  -4   3    0.96    1.42
   6   4  -3    4.33    1.95
  -2   6   2  279.82   17.33
   2  -6   2  189.14   15.23
   2  -6  -2  227.15   18.69
   2  -6   2  200.72   16.29
   2   6   2  191.40   15.41
   2   6  -2  247.18   16.94
   2  -6  -2  206.58   17.18
   2   6   2  182.72   14.95
   2   6  -2  246.85   15.42
  -2   6  -2  156.20   13.31
  -2  -6   2  197.06   15.75
  -2  -6  -2  189.10   15.48
  -2   6   2  225.08   17.96
  -2   6  -2  186.61   15.43
  -4  -6   0   49.36    8.79
   4  -6   0   50.87    8.69
  -4   6   0   58.08    9.07
  -4   6   0   53.92    7.93
   4   6   0   49.34    7.14
   4   6   0   51.16    7.48
   4  -6   0   57.59    7.96
  -4  -4  -4  143.95   13.30
  -4   4  -4  146.16   18.60
  -4  -4   4  157.01   12.85
   4  -4  -4  179.11   14.67
   4  -4  -4  156.18   13.85
   4   4  -4  135.43   12.49
  -4  -4  -4  134.15   13.03
  -4   4  -4  149.47   13.09
   4  -4   4  136.74   11.70
   4   4  -4  155.01   13.26
   4  -4   4  158.13   13.15
   4   4   4  151.20   12.69
  -4   4   4  162.25   13.90
  -4   4   4  163.03   13.66
  -5  -1   5  488.40   28.13
   5  -1   5  507.82   10.99
   5   1   5  559.54   16.24
  -5   1   5  604.94   18.34
  -5   1  -5  476.09   28.32
   5  -1  -5  522.46   15.06
   5   1  -5  524.07   15.96
  -5   1  -5  505.71   13.17
   5   1   5  492.90    9.85
  -5   1   5  566.09   16.12
   5  -1   5  457.35   26.93
  -5  -1  -5  504.60   10.93
  -4  -5  -3   14.34    2.09
   4   5   3   19.05    4.87
  -4   5  -3   17.96    6.64
  -4   5  -3   18.33    6.79
   4   5  -3   20.37    4.65
  -4   5   3   20.97    4.91
   4  -5  -3   19.01    6.11
  -4   5   3   22.60    7.31
   4   5  -3   19.26    5.92
   4   5   3   17.42    9.70
   4  -5   3   19.26    7.90
   4  -5   3   18.86    3.90
  -4  -5   3   12.51    2.93
  -4  -5  -3   17.94    5.97
  -8   4   0   76.44    9.43
   8  -4   0   74.86   12.23
   8   4   0   74.90   10.31
   8  -4   0   63.64    8.38
   8   4   0   74.22    8.32
  -8  -4   0   65.30    6.54
  -8   4   0   69.74    8.44
   8   4   0   56.36    8.23
   9  -3   0   -0.18    1.74
  -9   3   0   -0.12    1.48
   9   3   0    0.82    0.58
  -9   3   0   -0.47    1.01
  -9  -3   0   -0.43    0.81
   9  -3   0    5.87    2.97
   9   3   0    2.07    2.19
   9   3   0   -0.06    2.74
  -9  -2  -2    3.46    1.49
   9   2  -2    7.45    3.82
   9   2  -2    9.05    3.58
   9  -2   2   13.20    5.11
  -9   2  -2    7.84    2.72
   9   2   2    7.94    4.52
   9   2  -2    6.75    2.25
   9  -2  -2    2.53    1.76
  -9   2  -2    4.52    1.68
   9   2  -2    9.14    3.67
   9   2   2   24.33    3.95
   9  -2  -2    9.50    3.75
   9  -2   2    7.47    4.23
  -9   2   2    8.61    3.51
  10   1   0 2794.59   72.97
 -10  -1   0 2929.36   75.72
 -10   1   0 2995.76   16.15
  10   1   0 2730.48   72.44
  10   0  -1   10.02    9.94
  10   0  -1   -0.12    1.12
 -10   0   1    0.03    0.38
 -10   0  -1    0.52    0.99
  10   0   1    2.21    3.29
  10   0   1    1.33    1.41
   4   6   1   11.19    3.07
  -4   6  -1    8.81    3.93
  -4  -6   1   35.59    7.99
   4  -6   1   37.58    5.77
  -4  -6  -1   40.14    9.68
   4  -6  -1   52.54   14.25
   4  -6   1   39.96    7.73
   4   6   1   26.87    7.92
  -4   6   1   33.93    7.47
  -4   6   1   48.19   18.36
  -4   6  -1   11.12    3.42
   3  -3  -5  702.23   20.25
   3   3  -5  729.22   21.68
  -3  -3  -5  607.54   18.21
  -3   3  -5  629.16   21.66
   3   3   5  641.98   18.63
  -3   3   5  605.21   16.89
   3  -3   5  570.37   16.50
   3  -3  -5  635.36   18.72
  -3  -3  -5  622.06   18.54
  -3  -3   5  603.45   17.63
   3  -3   5  651.25   20.30
  -3   3   5  742.70   21.44
   3   3   5  702.06   19.82
  -3   3  -5  558.26   17.56
   3   3  -5  699.69   22.27
  -6  -3   4  117.58    9.57
   6   3   4  167.37   16.02
  -6  -3  -4  129.27   15.26
   6  -3   4  133.96   11.23
  -6   3  -4  127.51   11.03
  -6   3   4  135.72   11.48
   6   3   4  129.10   11.21
   6   3  -4  131.80   11.52
   6   3  -4  124.22   10.93
   6   3  -4  122.36   15.13
  -6  -3  -4  129.59   11.10
   6  -3  -4  128.05   12.62
   6  -3  -4  133.99   12.32
   8   4  -1   51.01    9.02
   8   4   1   51.36    7.82
   8   4  -1   59.64   11.11
  -8   4  -1   53.38    9.36
   8  -4   1   57.65    9.28
  -8  -4  -1   56.78    9.02
   8   4  -1   58.85    9.36
   8  -4  -1   52.42    7.73
   8   4   1   57.64    9.27
  -8   4  -1   55.49    9.72
  -8   4   1   56.27    9.78
   8  -4  -1   42.01    6.60
   8  -4   1   55.92    8.58
   8   4   1   59.81    5.72
  -8   4   1   46.74    6.69
   9  -3  -1  304.28   18.36
  -9   3  -1  327.33   18.94
  -9  -3  -1  282.61   16.28
  -9   3  -1  288.93   16.48
   9   3  -1  275.46   19.29
   9   3  -1  297.58   18.02
   9  -3   1  308.22   19.63
   9   3   1  321.17   19.73
  -9   3   1  327.06   18.92
   9  -3   1  323.75   19.15
  -9   3   1  314.75   18.08
   3   6   2    5.81    2.59
  -3   6  -2    1.14    1.46
  -3   6  -2    2.52    1.83
  -3  -6  -2    0.65    1.95
  -3  -6   2    2.49    1.28
   3  -6  -2    3.39    2.03
   3  -6   2    2.87    2.03
   3  -6  -2    7.14    2.27
   3   6  -2    7.99    3.13
   3  -6   2    3.57    1.89
  -3   6   2    7.91    4.12
   3   6   2    2.38    1.73
  -3   6   2    6.83    2.18
 -10   1   1   18.53    4.70
 -10  -1   1   14.24    3.86
  10   1  -1    4.98    2.59
  10  -1  -1   12.92    2.75
  10  -1  -1   14.34    7.02
  10  -1   1   10.65    5.79
  10   1  -1   21.60    9.21
  10   1   1   54.71    9.17
  10   1   1   54.28   12.57
 -10   1  -1   16.51    5.14
 -10  -1  -1   18.04    4.77
 -10   1   1   15.58    4.98
  -7   2  -4    5.97    4.08
  -7  -2  -4    4.57    2.33
   7  -2   4    6.60    3.53
   7   2  -4    8.87    3.00
   7   2  -4   18.34    2.63
   7  -2  -4   11.40    2.56
   7  -2  -4   15.39    5.95
   7   2  -4   28.99   10.30
  -7   2  -4    7.55    2.77
  -7   2   4   23.17    4.31
   7   2   4    4.72    5.02
   7  -2   4   11.85    8.21
  -7  -2   4   11.94    1.73
   7   2   4    8.33    4.44
   7   2   4    7.46    3.05
   0   5   4    2.71    2.67
   0  -5  -4    0.62    1.10
   0  -5   4    0.63    0.76
   0  -5  -4    0.29    0.89
   0   5  -4    2.36    2.79
   0  -5   4    0.93    2.46
   0   5   4    1.37    1.04
   0   5  -4    0.54    2.47
   0   0   6  817.40   24.18
   0   0  -6  851.79   22.84
   0   0  -6  764.45   22.30
   6  -5   2   69.78    9.46
   6  -5  -2   82.94   13.62
   6  -5   2   62.10    6.86
   6   5   2   61.40    9.52
   6   5  -2   57.07    8.82
  -6   5   2   58.66    8.37
   6   5  -2  109.08   12.22
  -6   5  -2   45.40    7.24
  -6  -5   2   77.92    8.06
   6   5   2   48.52    7.58
  -6  -5  -2   61.77    7.30
  -6   5  -2   59.05   11.51
   6  -5  -2   82.55   10.80
   6   5  -2   53.82    7.84
   1  -5   4   31.78    4.52
   1  -5   4   29.47    4.83
  -1   5   4   38.48   10.24
  -1   5  -4   34.82    8.95
  -1  -5   4   31.91    7.53
  -1  -5  -4   34.23    6.39
   1   5   4   38.17   10.20
   1   5  -4   38.01   12.99
  -1   5   4   34.00    6.69
   1  -5  -4   37.92    8.18
  -1  -5  -4   33.09    4.98
   1  -5  -4   33.60    5.59
  -1   5  -4   33.31    7.07
   1   5   4   55.63    8.08
   1   5  -4   30.61    5.16
  -1   0   6   -0.65    3.82
   1   0   6   -1.23    3.36
   1   0  -6   -0.67    2.22
   1   0  -6   -0.44    0.75
  -1   0  -6   -0.72    2.36
  -1   0  -6   -0.25    0.76
  -9   0   3 2604.33   68.29
   7  -5   0    4.10    2.41
   7   5   0    0.57    1.47
  -7   5   0   -1.02    1.34
  -7   5   0    0.05    0.65
   7   5   0    1.02    1.07
   7  -5   0    1.80    1.94
  -7  -5   0    0.48    1.04
   5   2  -5  185.90   15.33
  -5  -2  -5  201.99   18.57
  -5  -2   5  181.22   14.66
   5   2  -5  223.66   22.90
  -5   2  -5  196.61   24.99
  -5  -2  -5  172.56   14.67
   5  -2  -5  203.99   16.85
   5  -2   5  169.72   14.02
   5  -2   5  175.90   19.89
   5   2   5  218.10   17.55
   5  -2  -5  194.72   15.70
  -5   2   5  215.44   18.64
  -5   2  -5  165.06   14.06
   5   2   5  216.58   17.62
   0  -1   6    7.11    3.30
   0   1  -6   11.22    6.80
   0  -1  -6    3.21    1.40
   0   1   6    0.10    1.20
   0  -1  -6    1.47    2.36
   0   1   6    3.24    2.19
   5   6   0    4.51    2.46
   5   6   0    0.87    1.68
   5  -6   0    3.10    1.75
  -5   6   0    0.29    1.11
  -5   6   0   -0.09    1.30
  -5  -6   0   -0.08    1.57
   5  -6   0    0.99    1.42
 -10   2   0  225.90   17.68
  10   2   0  234.23   16.25
 -10   2   0  235.02   14.02
 -10  -2   0  232.41    4.96
  10  -2   0  220.06   17.61
  -1  -1  -6   15.64    4.80
   1  -1   6   13.31    5.76
   1   1  -6   13.72    7.37
  -1   1  -6   14.84    6.38
  -1   1  -6   10.77    2.01
  -1   1  -6    9.27    5.81
  -1   1   6   11.69    6.41
   1  -1  -6   11.28    4.93
  -1  -1  -6   11.70    2.97
  -1  -1   6   11.58    4.47
   1   1   6   11.75    4.50
   1   1   6   14.20    5.99
  -1   1   6   16.36    6.46
   1  -1  -6    7.35    4.64
  -5  -4  -4   21.48    9.09
  -5  -4  -4   17.25    5.71
   5  -4   4   12.84    3.56
  -5   4   4   16.34    3.38
   5   4   4    3.01    2.48
  -5   4  -4   21.68    6.83
   5  -4  -4   14.90    6.74
   5   4  -4   14.19    5.10
  -5   4   4   19.18    8.05
  -5  -4   4   14.29    3.91
   5  -4  -4   16.65    6.51
  -5   4  -4   21.70    6.95
   5   4   4   16.33    3.22
   5   4  -4    6.41    7.14
  -6   0   5   -0.56    2.14
   6   0   5    4.55    3.35
  -6   0   5    1.00    0.67
   6   0   5    2.24    3.20
  -6   0  -5    1.77    2.07
   6   0  -5   -0.41    1.20
  -6   0  -5    5.33    3.84
  -2  -5  -4  307.24   18.54
   2  -5  -4  394.10   22.74
   2  -5   4  345.62   22.56
   2  -5   4  358.35   20.27
  -2  -5   4  361.86   21.11
   2   5  -4  394.63   22.84
   2   5  -4  401.20   25.74
  -2   5  -4  378.67   25.53
  -2  -5  -4  391.60   24.16
   2  -5  -4  396.14   23.29
   9   1   3  112.67   11.74
   9   1   3  138.49   11.98
  -9  -1   3  168.19   13.92
  -9   1   3  135.72   11.87
   9  -1  -3  139.70   15.06
   9   1  -3  156.52   14.83
   9  -1   3  127.32   12.05
   9  -1   3  147.52   13.38
   9   1  -3  125.17   10.32
  -9   1  -3  145.17   13.07
   9   1  -3  136.04   11.58
  -9  -1  -3  138.87   11.68
   5   5  -3   30.40    6.67
  -5   5   3   25.46    3.49
   5   5   3   19.11    4.31
   5  -5   3   25.27    5.92
  -5  -5  -3   25.93    4.83
  -5  -5   3   26.24    2.99
   5  -5   3   32.13    7.14
   5  -5  -3   32.27    5.72
   5   5  -3   31.25    5.93
  -5  -5  -3   23.61    2.67
  -5   5  -3   38.68    9.79
   5   5  -3   29.39    7.80
  -5   5  -3   36.02    9.57
   5   5   3   30.43    4.47
  -5   5   3   34.42    8.59
  -2   0  -6 1988.11   51.79
   2   0  -6 2003.03   52.05
   2   0   6 1918.00   52.69
  -2   0  -6 1961.21   52.93
   2   0  -6 1973.86   52.77
  -2   0   6 1938.46   52.98
   7   5   1    5.25    2.59
   7  -5   1    7.33    5.18
   7   5  -1    5.69    2.19
  -7  -5  -1    4.34    2.07
  -7   5  -1    5.82    2.51
  -7  -5   1    3.73    2.16
  -7   5   1    4.84    2.02
   7  -5  -1    3.22    2.37
   7  -5   1    1.07    4.09
   7  -5  -1    4.34    1.86
   7   5  -1    6.60    2.82
   7   5   1    4.32    1.46
  -7   5  -1    4.52    2.41
  -7   5   1    4.17    2.02
   7   5  -1    5.61    2.38
  -7  -5  -1    6.66    3.68
   4  -3   5  134.65   11.23
  -4   3  -5  145.83   14.25
  -4   3   5  144.98   12.56
  -4  -3  -5  130.80   12.84
  -4  -3  -5  141.52   13.84
   4   3   5  160.93   13.42
  -4  -3   5  150.26   13.21
  -4   3   5  167.92   14.00
  -4   3  -5  134.77   18.04
   4  -3  -5  138.79   11.68
   4   3  -5  156.05   14.28
   4   3   5  149.64   12.95
   4  -3  -5  148.12   12.53
   4  -3   5  138.51   12.73
   0  -6  -3   13.20    5.03
   0  -6   3   39.61   10.03
   0  -6   3   38.07   10.40
   0   6   3    4.55    3.28
   0   6  -3   35.12    9.13
   0   6  -3   16.96   11.49
   0  -4   5    0.56    0.99
   0   4  -5    0.91    1.53
   0   4   5    0.45    2.07
   0   4   5    3.11    2.02
   0   4  -5    3.99    3.46
   0  -4  -5    0.27    1.08
   0  -4  -5    1.44    1.61
   8   3  -3   40.30   16.11
   8   3   3   46.79   10.98
   8   3  -3   40.26    7.32
  -8   3  -3   42.68    8.75
  -8   3   3   39.33    8.22
  -8  -3  -3   41.59    8.10
   8  -3   3   37.23    8.76
   8   3  -3   38.22    5.61
   8  -3   3   44.88    7.42
   8  -3  -3   39.55    6.30
   8  -3  -3   43.29    8.02
   8   3  -3   41.93    6.95
  10   0  -2   11.97    3.34
  10   0   2    2.92    2.29
 -10   0  -2    3.41    2.91
  10   0   2    5.41    3.77
  10   0  -2    1.37    0.93
  -1   6  -3  346.85   20.79
  -1   6  -3  334.81   19.95
   1   6  -3  377.55   22.05
   1   6  -3  414.39   24.53
  -1  -6  -3  366.36   20.81
   1   6   3  440.16   25.27
   1  -6  -3  394.77   22.52
  -1  -6  -3  301.68   19.02
  -1  -6   3  390.16   22.90
   1  -6  -3  364.89   22.79
   1  -6   3  398.10   23.63
  -1  -6   3  398.29   22.87
   1  -6   3  372.17   21.69
  -1   6   3  386.19   22.37
   6   1   5   14.51    9.35
   6  -1   5   26.85   13.25
  -6   1  -5   44.70   14.89
   6   1  -5   16.32    3.35
   6  -1  -5   13.96    4.40
  -6   1   5   12.46    3.95
  -6  -1   5   16.58    3.87
   6  -1   5   13.51    5.39
   6  -1  -5   15.74    5.30
  -6   1  -5   14.66    5.20
   6   1  -5   22.33    8.16
   6   1   5   16.25    5.15
  -6  -1  -5   13.73    4.91
   6   1   5   10.14    5.18
   4   6  -2  102.47   10.79
   4   6  -2   99.50   10.56
  -4  -6   2  109.50   10.92
  -4   6   2  111.32   11.30
   4  -6   2   91.84    9.19
   4   6   2  111.83   13.28
  -4   6  -2   98.97   10.30
  -4   6   2  110.46   10.73
   4   6   2  110.31   11.25
   4  -6  -2  100.16    9.90
  -4  -6  -2  113.45    5.59
   4  -6  -2  105.62   12.46
   4  -6   2  117.09    9.94
  -1  -4   5  165.35   13.63
  -1   4  -5  176.88   15.24
   1  -4  -5  194.53   16.47
   1   4  -5  192.68   19.01
   1  -4   5  195.60   17.18
   1   4   5  191.68   15.64
  -1  -4  -5  187.84   15.39
  -1   4  -5  176.13   16.54
  -1   4   5  201.82   16.66
  -1  -4  -5  186.42   15.98
  -1   4   5  282.75   17.99
   1   4   5  271.24   16.41
   1  -4  -5  190.66   15.46
   1   4  -5  198.25   16.34
  -5  -6   1  580.71   17.15
   5  -6  -1  596.75   16.45
   5  -6   1  539.88   16.37
   5   6   1  491.87    9.94
   5   6   1  510.16   15.91
  -5  -6  -1  504.15   10.00
  -5   6  -1  502.05    7.07
  -5   6  -1  500.34    8.99
   5  -6   1  550.86   17.27
 -10   2  -1   67.95    7.73
  10   2  -1   81.52    8.14
 -10   2   1   73.97    7.76
  10   2  -1   80.59   10.20
 -10   2   1   67.36    9.09
 -10  -2  -1   66.14    6.89
  10  -2   1   63.30    9.28
  10   2  -1   62.03   11.13
  10  -2   1   65.00    8.22
 -10   2  -1   71.27    9.79
  10   2   1   94.65   11.84
  10  -2  -1   80.96    8.33
  -2   1  -6  169.68   16.41
   2   1  -6  202.07   17.83
  -2   1   6  187.33   16.07
  -2  -1   6  170.15   15.94
   2   1   6  191.69   16.12
  -2  -1  -6  187.13   17.94
   2  -1  -6  206.27   16.41
   2  -1  -6  185.86   16.51
   2  -1   6  180.58   18.62
   2   1   6  196.18   16.92
  -2   1  -6  194.80   16.49
  -2  -1  -6  193.09   15.75
  -2   1  -6  252.20   16.30
   7  -4  -3  183.78   17.44
  -7  -4  -3  182.57   16.44
   7  -4  -3  195.01   17.67
   7   4  -3  201.09   17.93
   7   4  -3  183.37   14.86
   7   4  -3  170.40   14.59
  -7   4  -3  176.36   14.76
   7   4  -3  201.66   17.37
  -7   4  -3  160.03   13.12
  -7   4   3  180.17   14.77
  -7  -4  -3  187.43   16.48
   7  -4   3  160.25   15.75
   7   4   3  236.31   16.02
   7  -4   3  173.52   15.83
   8  -4   2  285.92   17.06
   8   4  -2  330.43   20.04
   8   4  -2  256.19   16.42
  -8  -4  -2  242.30   14.53
   8   4  -2  248.49   16.78
   8  -4  -2  257.57   16.19
   8  -4   2  270.48   16.88
   8   4   2  257.42   14.75
   8   4  -2  261.04   15.52
  -8   4   2  298.34   17.67
  -8   4  -2  271.38   16.11
  -8   4  -2  242.34   14.46
   8   1   4 1801.76   48.98
   8   1  -4 1778.91   47.58
  -8  -1   4 1584.77   43.22
   8  -1   4 1803.55   48.59
   8  -1  -4 2038.49   54.19
  -8   1  -4 2053.64   55.11
  -8  -1  -4 1907.06   51.39
  -8   1  -4 1856.15   48.92
   9   3  -2   24.10    6.91
   9  -3  -2   21.61    5.23
   9   3  -2   23.49    3.58
   9  -3   2   24.49   10.67
   9   3   2    9.92    3.20
  -9   3  -2   20.36    4.01
   9  -3  -2   29.77   11.35
   9   3   2   28.61   11.72
   9   3  -2   22.46    6.81
  -9   3  -2   14.99    2.67
  -9  -3  -2   25.08    6.01
   9  -3   2   23.70    4.28
  -9   3   2   23.65    5.56
   9   3  -2   24.69    3.52
  10   1  -2  296.64   18.05
 -10  -1  -2  313.62   18.22
  10  -1  -2  299.93   19.66
  10   1  -2  306.33   18.51
 -10   1   2  320.62   18.56
 -10  -1   2  354.59   20.29
 -10   1  -2  340.47   19.95
  10   1   2  268.42   17.09
  10   1  -2  347.67   19.93
  10  -1   2  307.26   19.86
  10  -1   2  298.56   20.06
  10   1   2  321.73   20.36
  -3   5  -4   18.55    5.00
  -3   5  -4   13.32    4.79
  -3   5   4   19.40    8.04
  -3   5   4   13.92    4.73
   3  -5   4   21.30    7.80
  -3  -5   4   16.94    5.16
   3  -5   4   18.70    2.97
   3  -5  -4   15.94    5.82
   3  -5  -4   18.19    6.73
   3   5   4   15.82    4.14
  -3  -5  -4   16.46    4.37
   3   5  -4   36.59    6.22
   0   7   0    2.59    1.30
   0  -7   0    2.27    2.05
  -2  -6  -3   21.58    8.57
   2  -6  -3   22.10    6.71
   2   6   3   11.63    5.15
  -2   6  -3    4.57    2.97
   2  -6   3   28.14    4.99
  -2  -6   3   28.59    7.49
  -2   6  -3   13.15    7.51
   2  -6  -3   30.66    7.08
  -2   6   3   33.65    8.08
   2   6   3    9.04    3.48
  -2  -6   3   33.68    7.45
   2   6  -3   39.53    7.66
  -2   6   3   21.00    6.55
  -3   0   6    1.32    2.17
  -3   0   6   -3.42    7.09
   3   0  -6    0.56    1.75
  -3   0  -6   -0.13    3.07
   3   0   6   -1.94    7.40
   3   0  -6    1.29    0.75
  -3   0  -6    1.06    1.22
   2  -4  -5   29.31    5.27
  -2  -4  -5   33.27    8.60
   2   4   5   37.44    8.12
  -2  -4   5   21.46    4.78
   2  -4  -5   30.42    6.37
  -2   4  -5   46.49   14.45
  -2  -4  -5   33.43   10.20
   2   4  -5   19.05    3.53
  -2   4  -5   28.77   10.86
  -2   4   5   43.78    6.95
   2   4  -5   26.95    6.13
   2  -4   5   24.07    2.89
   2   4   5   25.64    3.37
   0  -2  -6  410.88   24.66
   0   2  -6  414.28   24.69
   0   2  -6  368.96   22.93
   0   2   6  422.67   25.24
   0  -2   6  342.10   22.37
   0   2   6  421.64   24.27
   0  -2  -6  404.23   23.18
  -1   7   0    2.20    2.40
   1   7   0    0.79    1.84
  -1   7   0    0.38    0.33
   1   7   0    0.94    1.20
  -1  -7   0    1.41    1.74
   1  -7   0    7.22    2.90
  -1   7   0    1.67    1.63
  -1  -2  -6   84.16   10.95
   1   2  -6   78.35   11.53
   1  -2  -6   84.94   12.97
   1   2   6   94.16    9.55
   1  -2   6   81.79    9.14
  -1  -2   6   83.34    9.60
   1  -2  -6   92.51    9.25
  -1  -2  -6   84.76   10.23
  -1   2  -6   76.12   12.01
  -1   2   6   97.52   10.09
   1   2  -6   85.16   16.12
   1   2   6   85.90    9.02
  -1   2  -6   80.17   14.13
  -1   2   6   93.29   12.67
  -9   2  -3  130.18   11.19
  -9   2   3  131.28   11.18
   9   2   3  124.40   14.67
  -9  -2  -3  120.96   10.82
   9  -2   3  120.53   11.41
   9  -2  -3  130.13   11.50
   9   2   3  146.51   12.44
   9  -2  -3  103.06   13.26
   9   2  -3  132.48   12.09
   9  -2   3  133.50   11.54
  -9   2  -3  130.12   10.75
   9   2  -3  152.90   13.26
   9   2  -3  135.07   14.78
   9   2  -3  126.35   11.13
   7  -3  -4  259.11   17.02
   7  -3   4  243.62   15.22
   7   3  -4  288.36   17.45
  -7  -3  -4  233.21    6.63
  -7   3  -4  235.91   14.48
   7   3  -4  263.78   15.65
   7   3   4  234.88   16.94
   7  -3  -4  264.34   17.00
   7   3   4  273.06   15.85
   7   3  -4  259.17   17.29
  -7   3   4  253.19   16.10
   7  -3   4  220.42   19.86
  -7  -3   4  251.66   14.75
   3  -1  -6    7.56    4.17
   3  -1   6    7.99    3.06
   3   1  -6    5.83    3.13
  -3  -1  -6    9.29    4.78
  -3   1  -6    5.17    4.16
  -3   1  -6    7.93    5.20
  -3  -1  -6    5.20    2.82
   3  -1  -6    4.35    1.82
   3   1  -6    4.56    5.03
   3   1   6    2.89    2.68
  -3   1   6   -6.72   28.89
   3   1   6   29.68    5.63
  -3   1   6    1.34    2.34
   3  -1   6   -0.29    4.59
   0  -7  -1    6.80    3.05
   0   7   1    7.05    3.05
   0  -7   1    9.46    2.57
   0   7  -1    8.30    2.80
   0   7   1    6.40    4.88
   0   7  -1    1.91    0.81
   0   7  -1   18.33    5.77
   9  -4   0    1.25    2.15
   9  -4   0    1.03    1.02
   9   4   0    0.51    0.80
  -9  -4   0   -0.21    0.66
  -9   4   0    0.75    1.90
  -9   4   0    1.90    1.94
   9   4   0    4.50    2.32
   1  -7  -1  428.52   25.05
  -1   7  -1  540.63   16.61
  -1  -7   1  388.25   22.63
   1   7  -1  413.86   26.19
  -1   7   1  392.88   22.74
   1   7   1  419.88   24.39
  -1  -7  -1  419.50   24.43
   1  -7   1  453.71   26.07
  -2  -7   0  348.86   20.35
  -2   7   0  318.87   17.94
   2   7   0  407.92   24.73
  -2   7   0  431.43   28.41
   2  -7   0  385.58   24.81
  -2   7   0  366.49   21.40
   2   7   0  353.38   24.68
   6  -2   5   15.66    7.59
   6   2   5   13.34    7.30
  -6  -2   5    8.47    2.71
   6   2  -5   16.08   11.57
   6  -2   5   16.41    6.20
   6   2  -5   18.41    4.26
  -6   2   5   23.50    7.69
  -6  -2  -5   20.51    6.40
  -6   2  -5   12.79    6.08
   6  -2  -5   20.56    7.82
   6  -2  -5   27.87    7.63
   6   2  -5   16.26    6.26
  -6  -2  -5   15.38    3.64
  -6   2  -5   23.49    7.73
   7  -5  -2   11.13    1.61
  -7   5  -2   14.49    4.13
   7   5  -2   11.91    3.22
   7   5   2   26.43   13.10
   7  -5   2   11.83    5.73
  -7   5   2    4.79    3.00
  -7  -5  -2   12.30    5.21
   7  -5   2   17.80    8.07
   7  -5  -2   20.38    8.71
  -7  -5   2   11.59    3.45
  -7  -5  -2   22.84    8.33
   7  -5  -2   12.32    6.40
   7   5  -2   13.30    4.80
  -7   5  -2    5.36    2.71
   7   5  -2   15.22    6.34
   7   5   2   13.56    2.63
  -2  -2   6    4.94    3.10
   2  -2  -6    5.74    2.90
   2   2   6    1.44    1.46
  -2   2  -6    0.77    3.02
  -2   2  -6    1.68    2.94
  -2  -2  -6    1.77    2.90
   2  -2   6    3.16    3.32
  -2  -2  -6    1.51    1.72
   2  -2   6    2.78    0.94
  -2   2   6    2.44    1.30
   2   2  -6    5.86    3.49
   2   2   6    2.68    1.99
   2   2  -6    1.61    2.14
   2  -2  -6    3.10    3.43
   5   3   5   61.32    8.48
  -5   3   5   94.54   10.25
  -5   3  -5   45.60    9.19
   5   3   5   50.24    8.16
   5  -3   5   45.67   13.97
   5   3  -5   85.07   12.98
  -5   3   5   99.27   17.22
  -5   3  -5   49.56    9.62
  -5  -3   5   66.44    7.97
   5  -3   5   45.34    8.42
   5  -3  -5   65.93    8.61
  -5  -3  -5   54.13   10.79
   5  -3  -5   85.14   12.23
   5   3  -5   65.95   10.75
  -5  -3  -5   45.60    8.51
   3   6   3 2166.29   57.81
  -3  -6   3 2426.81   63.27
  -3   6   3 2105.29   55.14
  -3  -6  -3 2383.95   61.73
  -3  -6  -3 2085.26   55.60
   3  -6  -3 2555.07   66.85
   3   6  -3 2388.46   62.09
   3  -6   3 2284.66   59.82
   3   6  -3 2501.31   68.05
   3   6   3 2325.42   60.89
  -3  -6   3 2339.87   60.66
   3   4  -5   68.25   10.21
   3  -4   5   57.92    8.40
   3  -4  -5   64.07    7.17
   3  -4   5   50.27    9.23
   3   4   5   66.42    7.02
  -3  -4  -5   59.34   10.18
  -3   4  -5   62.67   10.26
  -3  -4   5   72.13    9.48
  -3   4  -5   65.82   13.84
  -3   4   5   71.30    7.85
   3  -4  -5   66.38    9.69
  -3  -4  -5   63.24    9.56
   3   4   5   61.69   10.41
  -3   4   5   83.61    8.54
   6   6   0 2856.66   75.07
  -6   6   0 2686.73   70.29
  -6  -6   0 2465.07   64.92
  -6   6   0 2572.33   66.94
   6  -6   0 2611.62   68.03
   6  -6   0 2698.70   71.05
   8  -2   4  328.71   23.31
   8   2  -4  420.84   24.61
   8   2  -4  473.20   29.24
  -8   2  -4  281.95   20.83
   8   2  -4  376.54   21.97
   8   2   4  302.54   19.49
  -8   2   4  447.62   25.87
   8  -2  -4  462.69   27.02
   8  -2  -4  414.62   25.27
  -8  -2  -4  285.26   17.03
  -8  -2   4  324.70   18.34
  -8   2  -4  282.37   16.80
   8  -2   4  304.76   18.61
  -6  -4  -4  208.63   16.88
  -6   4  -4  196.86   16.53
   6  -4   4  208.67   17.43
   6   4  -4  199.96   19.69
 -11   0   0   -0.21    1.44
  11   0   0    1.51    0.96
 -10   3   0  104.24   11.11
  10   3   0   91.41    9.20
 -10  -3   0  113.09    4.01
 -10   3   0  134.09   12.61
  10   3   0  160.22   14.02
  10  -3   0  114.16    8.59
  10   3   0  109.15   12.30
  10  -3   0  105.76   11.45
   6  -5  -3    2.81    2.81
   6   5  -3    0.65    1.35
  -6  -5  -3    1.18    1.33
  -6   5  -3    1.02    1.04
  -6   5  -3    3.34    1.21
   6   5  -3    4.54    2.44
   6  -5  -3    4.78    2.67
   6  -5   3    1.12    1.51
   6   5   3    3.31    1.29
  -6   5   3    1.23    1.73
   6   5   3    2.16    4.96
  -6   5   3    1.81    1.04
   6   5  -3    5.25    2.57
   6  -5   3    2.36    2.91
  -6  -5   3    2.27    1.46
  -6  -5  -3    5.39    2.87
   5  -6  -2   21.34    7.87
  -5   6  -2    1.37    1.52
   5   6  -2   50.52   11.43
   5   6   2    1.69    1.46
  -5   6  -2    2.01    1.54
   5   6   2   11.93    5.65
   5   6  -2    6.72    2.83
  -5   6   2   19.85    3.92
  -5  -6   2   18.59    3.68
  -5  -6  -2   12.95    4.35
   5  -6   2   18.23    7.05
   5  -6  -2   33.68    8.43
   5  -6   2   21.50    4.53
  10   2   2   94.35   16.18
  10  -2  -2   95.17   11.38
  10   2  -2  102.39   12.37
  10  -2  -2  100.79   12.13
  10   2  -2  105.75   11.65
  10  -2   2  105.64   15.38
  10   2   2  173.80   14.40
 -10   2  -2  109.46   11.35
  10  -2   2  103.90   11.18
 -10  -2  -2  109.19   11.83
  10   2  -2  108.30   10.71
  10   2  -2  117.05   12.13
 -10   2   2  111.33   12.26
 -10   2  -2  103.96   10.48
  -9  -4  -1  191.57   16.16
   9   4   1  238.77   15.46
   9  -4  -1  190.60   16.46
   9   4  -1  186.10   15.72
   9  -4  -1  169.83   13.67
   9  -4   1  174.88   15.90
  -9   4   1  189.53   15.28
   9   4   1  183.33   18.07
   9  -4   1  171.95   14.30
  -9   4  -1  187.78   15.98
   9   4  -1  189.00   15.31
  -9   4   1  179.68   15.15
   9   4   1  156.70   12.58
  -9   4  -1  177.04   14.24
   9   4  -1  161.33   13.69
  -4   5  -4  216.73   18.39
  -4  -5   4  227.37   18.17
   4   5   4  382.22   23.47
   4   5  -4  360.34   23.57
  -4  -5   4  278.11   16.12
  -4   5   4  315.35   18.22
   4   5   4  294.14   18.16
   4  -5  -4  292.28   19.41
   4  -5   4  250.61   15.26
  -4  -5  -4  240.30   15.21
  -4   5  -4  232.80    7.52
   4   5  -4  316.73   18.91
   4  -5  -4  322.09   18.92
   2   7  -1   15.82    9.15
  -2   7  -1    1.99    0.89
  -2   7  -1   21.43    4.84
   2   7  -1    6.60    3.80
   2   7   1   13.57    4.70
  -2   7   1    4.77    3.13
  -2   7   1   14.06    7.21
   2   7   1    2.49    2.46
   2  -7   1   13.63    4.21
   2  -7   1    6.71    4.16
  -2  -7  -1    1.67    5.36
   2  -7  -1   11.23    7.00
  -2  -7   1   16.14    3.39
   4   0   6   90.20    9.88
  -4   0  -6   97.80   14.02
   4   0  -6  100.58   10.08
   4   0  -6  158.81   13.61
  -8   5   0  153.67   12.60
  -8  -5   0  166.77   13.10
   8  -5   0  169.63   14.17
  -8   5   0  166.30   14.71
   8  -5   0  162.19   13.34
   8   5   0  147.70   12.17
   8   5   0  187.34   16.40
  -8  -5   0  161.88   13.41
   7   0  -5  184.01   16.05
   7   0   5  131.62   12.68
  -7   0   5  193.09   16.24
   7   0  -5  181.90   14.91
   7   0   5  154.17   17.72
  -7   0  -5  168.31   17.66
  -7   0  -5  159.90   14.08
  -6  -6   1    3.41    3.26
   6  -6  -1    1.52    1.20
   6  -6   1   -0.01    1.74
  -6  -6  -1    4.39    2.84
  -6   6  -1    2.15    1.41
   6  -6   1   13.34    3.96
   6  -6  -1    8.96    5.43
  -6   6   1    1.79    0.71
  -6   6  -1    1.36    1.13
   6   6   1    1.75    1.93
  -6   6   1    1.68    1.45
   6   6   1    1.62    1.64
   6   6  -1    0.75    1.28
  11   1   0    2.23    2.60
 -11   1   0    0.46    1.01
 -11  -1   0    1.65    2.20
  11   1   0    0.25    2.53
  11  -1   0    0.25    0.87
   3  -7   0    1.01    1.90
  -3  -7   0    0.83    1.02
  -3   7   0   -0.91    2.38
   3   7   0    1.13    1.99
   3   7   0    0.18    1.24
  -3   7   0   -0.24    0.84
 -11   0  -1 1725.82   46.11
 -11   0   1 1857.21   48.26
  11   0  -1 2101.98   55.13
  11   0   1 1780.76   48.77
 -11   0   1 1707.10   44.97
  10   3  -1  162.25   16.65
  10  -3   1  167.79   18.36
  10   3  -1  147.60   14.03
  10  -3   1  134.45   11.66
   4   1   6 2892.38   76.37
   4   1  -6 3112.24   21.45
   3   2   6    1.65    2.05
  -3   2   6    2.14    2.42
  -3   2  -6    4.74    2.64
   3  -2   6    2.72    1.83
   3   2  -6    4.08    2.58
  -3  -2  -6    0.58    1.75
   3   2  -6    0.16    1.42
   3  -2   6    1.60    3.95
   3  -2  -6    1.86    2.29
   3   2   6    0.68    1.03
   3  -2  -6    2.20    1.82
  -3  -2  -6    2.94    1.47
  -3  -2   6    3.14    2.48
  -3   2   6    1.07    0.71
   7  -1   5    9.62    4.49
  -7  -1   5    6.24    3.04
   7  -1  -5    9.00    3.30
  -7   1  -5    9.41    4.02
   7  -1  -5    7.94    3.43
   7   1  -5    7.02    2.99
  -7  -1   5    8.41    2.33
   7   1   5    4.46    3.84
  -7   1  -5    8.70    3.06
  -7  -1  -5   10.69    4.23
  -7   1   5   13.50    5.10
   7   1  -5   11.80    3.84
   7  -1   5   10.01    3.68
   7   1   5    8.08    3.21
   8   5  -1    0.56    1.83
   8   5   1    2.61    1.10
   8   5   1    0.55    2.12
   8  -5   1   -1.15    2.49
   8  -5   1   -1.31    2.02
  -8   5   1    2.06    2.04
  -8   5   1    0.59    1.25
  -8   5  -1    2.41    1.90
   8   5  -1    3.88    2.02
  -8  -5  -1    2.12    2.80
   8  -5  -1    1.92    2.28
   8  -5  -1    1.28    1.47
  -8   5  -1   -0.09    1.42
  11  -1   1   19.63    5.74
  11  -1  -1   31.38    9.32
  11   1  -1   26.69   12.33
 -11   1  -1   58.03   11.45
 -11  -1   1   20.57    3.67
 -11  -1  -1   25.99    6.56
  11   1   1   20.16    8.92
  11  -1   1   29.40    9.85
 -11  -1   1   26.82    6.52
 -11   1   1   22.11    4.02
 -11   1   1   27.83    8.03
  11   1   1   18.36    3.83
  11  -1  -1   21.52    3.62
 -10   0  -3    0.37    1.27
 -10   0   3   -0.40    1.65
  10   0   3    1.09    2.10
  10   0  -3    2.96    2.12
  10   0   3    2.11    2.35
  10   0  -3    2.12    1.80
   0   7  -2    2.17    1.00
   0   7   2    0.19    1.01
   0  -7   2    2.58    1.30
   0  -7   2    1.86    2.15
   0  -7  -2   -0.23    2.15
   0   7  -2    7.98    4.58
   0   7   2    4.85    3.20
   0  -7  -2    0.46    0.68
   3  -7   1   30.63    7.97
   3  -7  -1   34.61    9.94
   3   7   1   22.33    4.67
   3   7  -1   64.99    9.52
  -3   7   1   43.81   10.74
   3   7   1   21.25    6.57
   3  -7   1   27.27    3.44
  -3   7   1   35.68    7.13
  -3   7   1   63.20   11.23
   3   7  -1   35.41   10.06
  -3  -7  -1   27.74   10.54
  -3  -7   1   22.83    9.74
  -3   7  -1   16.72    8.98
   4  -6   3   17.16    6.88
  -4   6  -3   16.17    4.33
   4  -6  -3   21.02    7.60
   4  -6   3   18.94    4.31
  -4   6  -3   16.09    5.30
   4   6  -3   38.54   10.68
   4   6   3   16.36    5.34
  -4   6   3   35.91    7.10
   4  -6  -3   36.71    9.61
  -4  -6  -3   13.00    3.18
  -4   6   3   15.37    6.55
   4   6  -3   36.05    5.67
   4   6   3   10.67    6.24
   4   6  -3   44.52   12.09
  -4  -6   3   37.05    6.42
  -4  -6  -3   19.71    7.54
   4  -4  -5   31.68    5.29
   4  -4   5   25.54    6.62
   4   4   5   31.70    5.87
  -4  -4   5   29.16    4.40
   4  -4  -5   31.15    6.86
   4   4   5   35.84    5.44
  -4   4   5   34.14    8.21
   4  -4   5   28.08    2.50
  -4   4  -5   40.70    9.58
  -4  -4  -5   37.88    6.71
   4   4  -5   35.45    7.95
  -4  -4  -5   30.00    6.40
  -4   4  -5   38.87    8.11
  -4   4   5   52.66    7.67
   0   3  -6    2.06    3.36
   0   3  -6    1.44    1.83
   0   3   6    0.87    2.52
   0  -3  -6    2.53    1.95
   0  -3  -6    0.48    0.77
   0   3   6   -0.44    1.92
   0  -3   6    3.99    2.82
  -1   7  -2    2.58    1.72
   1  -7  -2    3.54    2.17
   1   7   2   14.24    5.55
   1   7   2    8.88    3.86
  -1  -7   2   12.79    5.48
   1  -7   2   16.28    5.76
   1  -7  -2    3.61    2.45
  -1  -7  -2    8.38    3.39
   1   7  -2   11.52    3.01
  -1   7  -2    7.68    5.97
  -1   7   2    7.56    5.83
  -1  -7  -2    7.10    5.76
   8  -4   3   25.64    5.29
  -8   4   3    3.46    6.33
   8  -4   3   28.26   12.35
  -8  -4  -3    5.50    2.18
  -8   4  -3    6.39    2.31
  -8   4  -3    6.83    3.11
   8  -4  -3    6.31    2.89
   8  -4  -3   20.31    6.90
   8   4  -3    8.75    3.15
   8   4   3    6.92    2.19
   8   4  -3   67.88   17.14
   8   4  -3   12.03    3.42
  -8  -4  -3    6.74    3.45
  -9   0  -4    4.19    3.49
   9   0  -4    1.29    1.78
   9   0  -4    0.36    1.28
  -9   0  -4   -2.10    0.83
   9   0   4   -0.90    3.54
   9   0   4   -0.14    3.23
   1   3  -6  147.45   15.09
   1   3  -6  130.12   19.49
  -1   3  -6  138.51   13.09
  -1   3  -6  150.12   17.34
   1   3   6  137.53   11.83
   1  -3  -6  148.92   14.05
  -1  -3  -6  141.76   11.88
  -1  -3   6  119.56   11.26
   1  -3   6  130.85   12.95
   1  -3  -6  146.96   14.17
  -1  -3  -6  157.06   15.16
  -1   3   6  146.83   12.71
  -1   3   6  150.87   14.46
   1   3   6  150.42   12.49
   9   3  -3  416.52   23.73
  -9   3   3  485.73   27.92
   9   3  -3  439.07   25.23
   9   3   3  447.29   31.52
  -9   3  -3  418.93   23.93
   9  -3  -3  425.79   25.17
  -9  -3  -3  460.42   27.15
  -9   3  -3  418.83   24.20
   9  -3  -3  438.07   25.37
   9  -3   3  430.84   25.05
   9   3  -3  455.90   26.92
   9   3  -3  405.13   25.06
   9  -3   3  381.19   23.70
 -10  -1   3   20.69    6.78
 -10   1  -3   17.71    4.50
 -10  -1  -3   22.00    6.76
  10   1  -3   14.04    6.08
  10  -1   3   26.98   10.46
  10   1   3   24.41    7.91
  10   1  -3   12.57    3.05
  10  -1   3   17.45    7.27
 -10   1   3   17.23    5.22
  10   1   3   13.33    3.82
  10   1  -3   17.72    5.94
  10  -1  -3   21.01    7.98
  -9   4  -2   56.68   11.12
   9   4  -2   55.85   10.29
  -9   4  -2   62.42    8.60
   9   4  -2   62.59    8.06
   9  -4  -2   56.57    9.53
   9  -4   2   73.56   10.90
   9  -4   2   65.33    7.30
  -9   4   2   71.33   10.48
   9   4  -2   65.96    7.41
   9   4  -2   60.05    6.93
   9   4   2   55.57    7.70
 -11  -2   0    0.62    0.92
  11  -2   0   -1.94    2.60
  11   2   0    0.52    1.77
 -11   2   0    0.65    0.86
  11  -2   0   -0.39    1.20
  11   2   0   -0.14    1.75
   9   1   4   -0.32    0.73
  -9   1  -4    0.76    2.83
  -9  -1  -4    1.60    2.11
  -9   1  -4    0.21    0.84
   9  -1   4    3.04    3.31
   9  -1   4    2.62    2.48
  -9  -1   4    2.39    2.26
   9   1   4   36.60    8.09
   9  -1  -4    3.80    3.47
   9   1  -4    5.02    2.89
  -9  -1   4    3.29    0.92
   9   1  -4    4.41    2.15
   9   1   4    6.11    3.78
  -9   1   4    2.36    1.66
   2   7   2  216.96   17.70
   2  -7   2  188.28   15.28
  -2   7  -2  186.96   15.78
  -2  -7   2  217.66   17.47
  -2  -7  -2  194.00   16.35
  -2   7  -2  174.38   14.26
   2   7  -2  220.04   17.92
   2  -7  -2  225.45   19.62
   2  -7   2  226.23   18.89
   2   7  -2  231.22   12.11
   2   7   2  225.32   19.88
   2  -7  -2  206.43   17.45
  -2   7   2  218.67   18.72
  -2   7   2  233.49    6.41
   5   5  -4   21.22    5.39
  -5   5   4   27.66    8.59
   5   5   4   16.89    5.16
  -5   5  -4   16.22    4.68
  -5  -5  -4   12.15    3.65
   5  -5  -4   26.71    5.88
  -5  -5   4   26.93    7.76
  -5   5  -4   13.81    4.51
   5   5   4   15.10    4.05
   5  -5   4   16.91    4.60
   5  -5   4   17.04    7.52
   5  -5  -4   23.69    8.97
  -5   5   4   21.24    4.41
  -5  -5   4   20.95    3.73
   5   5  -4   31.94   14.73
   6   3  -5   13.90    5.91
   6   3   5    6.09    2.38
  -6  -3  -5    6.16    2.73
  -6   3   5   15.24    8.03
   6   3   5    4.44    3.26
   6  -3   5   10.24    7.26
   6   3  -5   12.32    3.38
  -6  -3   5    7.32    3.63
   6  -3   5    5.81    2.48
   6  -3  -5   15.85    6.87
  -6  -3  -5    9.78    3.30
   6  -3  -5    7.76    3.81
  -6   3  -5    9.76    3.43
  -4   7   0  354.84   23.15
   4   7   0  331.13   20.09
   4   7   0  328.55   19.77
  -4   7   0  324.50   18.58
   4  -7   0  339.90   19.64
   4  -7   0  357.55   23.94
  -4  -7   0  321.53   18.93
  -5   0   6   -0.72    3.31
   5   0   6    3.04    3.02
  -5   0   6    2.29    2.26
   5   0   6   -1.53    3.97
  -5   0  -6    1.40    2.45
   5   0  -6    1.68    1.53
   5   0  -6    0.05    1.37
  -2   3  -6  116.86   15.15
  -2   3  -6  112.13   12.95
   2   3  -6  114.16   14.57
  -2  -3   6  117.05   10.73
   2  -3  -6  117.92   10.20
   2   3   6  100.20   10.39
  -2  -3  -6  114.17    7.44
   2   3   6  118.65   11.85
   2  -3   6  123.46   12.95
  -2   3   6  120.24   10.04
  -2  -3  -6  122.31   12.73
   2   3  -6  116.83   11.45
   2  -3  -6  112.14   11.78
  -4   2   6  305.86   18.80
  -4  -2   6  246.63   15.91
  -4  -2  -6  257.91   15.92
   4   2   6  313.90   18.45
  -4   2  -6  246.88   15.99
  -4   2   6  310.65   18.21
   4  -2   6  267.24   21.98
   4   2  -6  281.81   17.32
  -4  -2  -6  255.60   16.48
   4  -2  -6  272.24   17.51
   4   2   6  305.82   18.46
   4   2  -6  262.49   17.76
   4  -2   6  233.88    6.67
   4  -2  -6  279.43   17.04
   0   6  -4  668.78   22.89
   0  -6   4  626.91   18.71
   0  -6   4  733.53   20.08
   0   6   4  742.65   21.58
   0  -6  -4  764.56   21.17
   0   6  -4  619.12   18.29
  -7   2   5   54.99   11.19
  -7   2  -5   52.02   10.19
  -7   2  -5   55.50   12.15
  -7  -2  -5   54.16    8.94
   7   2  -5   50.48    8.93
   7  -2  -5   63.41   11.42
   7   2   5   58.01   12.10
   7   2   5   57.66    9.67
   7  -2  -5   54.25    7.71
   7  -2   5   46.77    9.63
   7   2  -5   55.96    8.58
  -7  -2   5   45.96    6.64
   7   2  -5   58.30   11.19
   6  -6   2  951.34   27.21
  -6  -6   2  957.38   26.29
  -6   6  -2  978.41   27.61
   6   6  -2  906.38   26.15
  -6   6  -2  964.20   26.77
   6  -6   2 1019.49   28.05
   6   6   2  942.41   26.45
  -6   6   2 1106.19   30.65
   6  -6  -2 1003.73   28.46
   6   6  -2  972.03   27.86
  -6  -6  -2  998.40   30.49
   6  -6  -2 1094.09   33.67
   6   6   2  943.70   27.77
   8   3  -4  279.32   16.61
   8  -3  -4  382.84   22.66
   8   3  -4  376.25   24.69
   8   3   4  268.74   16.05
  -8  -3  -4  222.00   19.39
   8  -3  -4  351.36   21.77
  -8   3  -4  224.05   18.29
  -8   3  -4  235.07   14.71
   8  -3   4  268.55   18.62
   8  -3   4  256.35   15.79
   8   3   4  275.85   17.07
   8   3   4  274.19   17.67
   8   3  -4  377.94   23.36
   0   5  -5    1.29    2.39
   0  -5   5    3.80    2.81
   0  -5  -5    0.83    1.97
   0  -5  -5    2.16    2.60
   0   5   5    0.88    3.66
   0   5   5   -0.23    1.93
   0   5  -5   -0.14    1.75
   1   6   4    9.61    4.25
   1  -6  -4    7.21    3.97
   1  -6  -4    6.99    2.99
  -1  -6   4    3.73    1.46
  -1   6  -4    4.08    2.43
  -1  -6   4    6.08    3.51
   1   6   4    6.70    3.47
  -1   6   4    8.65    4.08
   1   6  -4    3.41    4.04
   1  -6   4    7.34    6.28
  -1  -6  -4    5.26    3.00
   1  -6   4    4.34    4.38
   1   6  -4    9.26    7.38
  -1   6   4    5.93    3.41
  -1   6  -4    5.18    2.85
  11   0  -2    1.61    2.71
  11   0   2    0.57    1.76
 -11   0  -2    1.08    1.62
 -11   0   2    0.31    1.27
  11   0  -2    1.02    0.76
  11   0  -2    0.18    1.53
  11   0   2    1.88    1.86
 -10   3  -2   90.63   10.04
  10   3  -2   94.31    9.84
  10   3  -2   87.86   11.51
 -10   3   2  105.61   11.67
  10  -3   2   85.03    9.28
  10  -3  -2   95.79   11.94
 -10   3  -2   82.55   10.54
  10   3  -2   86.62   10.22
  10  -3  -2   79.35   10.88
  10   3   2  106.07   12.42
 -10  -3  -2   86.24   10.16
  10   3  -2   93.22   10.54
  10   3   2   92.49   10.96
  10  -3   2   89.06   10.17
  -1  -5  -5  671.18   19.53
  -1  -5  -5  728.29   21.61
   1  -5  -5  717.10   21.88
  -1  -5   5  650.41   19.52
   1  -5  -5  712.58   20.57
   1   5  -5  708.26   21.14
  -1   5  -5  655.85   23.96
   1   5   5  675.04   19.79
   1  -5   5  680.58   20.44
  -1   5   5  825.95   23.83
 -11   2   1   12.34    3.76
  11  -2  -1   12.93    5.84
 -11   2   1    6.82    2.44
  11   2  -1   10.99    3.21
 -11  -2   1   11.14    2.87
  11   2   1    5.15    2.84
  11  -2   1    9.54    4.19
  11  -2  -1   14.69    3.23
 -11   2  -1   12.16    4.60
 -11   2  -1    7.79    2.53
  11  -2   1   13.04    6.31
 -11  -2  -1   10.20    2.98
  11   2  -1   11.07    4.40
 -11  -2   1    8.17    2.67
   7  -6   0    1.66    1.78
   7   6   0    2.67    2.47
  -7   6   0    1.41    0.86
   7   6   0    0.23    2.37
  -7   6   0    0.86    1.23
   7  -6   0    0.35    2.83
  -7  -6   0    2.11    1.63
  -5   1  -6   14.72   11.66
  -5  -1  -6   22.07    7.58
  -5   1   6   18.14    7.92
   5   1  -6   15.37    6.34
   5   1   6   11.31    5.57
   5   1  -6   14.65    4.42
   5  -1  -6   11.61    2.92
   5  -1  -6   16.22    7.30
   5   1   6   16.50    8.14
  -5   1   6    3.81    2.40
  -5  -1  -6   17.44    6.85
  -5  -1   6    4.78    2.75
   5  -1   6   15.25    4.93
  -5   1  -6    2.19    2.21
   7  -4  -4   16.74    7.09
   7  -4  -4   15.83    6.29
   7   4  -4   11.67    4.23
  -7   4  -4   15.53    6.11
   7   4   4   13.76    4.27
  -7   4   4   15.04    6.03
   7   4   4    3.30    3.67
   7  -4   4   17.36    8.23
   7   4  -4   10.56    4.29
   7  -4   4   13.71    6.10
  -7   4  -4   12.24    6.88
   7   4  -4   11.94    4.57
  -4   7  -1    0.75    1.91
   4   7  -1    0.28    1.16
   4   7   1    3.31    2.31
   4  -7   1    0.78    1.04
   4   7  -1    3.98    3.04
   4  -7  -1    3.03    3.77
  -4  -7  -1    1.92    1.93
  -4   7   1   -0.14    1.19
  -4   7   1    0.02    1.16
   4  -7   1    1.84    1.91
  -4   7  -1    0.62    0.43
  -4   7   1    1.06    0.91
   4   7   1    1.57    2.29
  -4  -7   1    8.71    6.92
   8  -5  -2  589.74   18.72
  -8   5  -2  592.81   17.52
  -8  -5  -2  532.33   15.88
   8   5  -2  555.62   15.66
   8  -5  -2  551.24   17.42
   8   5   2  539.06   15.36
  -8  -5  -2  581.45   18.32
   8  -5   2  596.31   18.13
   8  -5  -2  529.84   14.55
   8  -5   2  503.72   11.65
   8   5  -2  558.02   17.22
  -8   5   2  592.49   17.72
  -8   5  -2  545.10   16.87
   8   5  -2  476.62   27.52
 -11  -1  -2   -0.17    1.70
  11   1   2    1.19    1.46
  11   1  -2    0.27    2.47
  11  -1  -2    0.75    1.79
  11   1   2    2.01    3.21
  11   1  -2    1.63    1.82
  11  -1   2    5.73    4.74
  11  -1   2    3.72    2.68
 -11   1  -2    0.54    2.13
 -11   1   2    0.15    0.43
 -11  -1   2    0.12    0.99
  11  -1  -2    1.24    2.68
  11   1  -2    0.53    0.69
  -2   6   4   49.54    9.53
   2   6   4   54.14    9.27
  -2   6  -4   55.79   11.95
   2   6  -4   67.49   12.03
  -2  -6   4   48.05    8.13
   2  -6  -4   48.73    7.35
   2  -6   4   51.73    8.17
   2  -6  -4   48.15    7.60
  -2  -6   4   60.54    6.57
   2  -6   4   52.82    8.17
   2   6   4   68.92    8.58
  -2  -6  -4   57.68    8.40
   2   6  -4   65.56    7.73
  -3   7   2   42.01    9.17
   3   7  -2   38.82    8.81
   3  -7  -2   24.07    7.06
  -3  -7   2   19.13    6.16
  -3  -7  -2   26.13    9.60
   3   7   2   14.35    4.41
  -3   7  -2   17.43    3.43
   3   7  -2   61.94   15.94
  -3   7  -2   16.39    5.53
   3  -7  -2   44.49   10.44
   3  -7   2   21.69    4.24
   3  -7   2   17.12    3.49
   3   7   2   14.97    5.79
  -3   7   2   41.26    9.80
   5   6   3  488.91   27.74
   5  -6   3  422.56   24.97
   5   6  -3  424.06   23.89
   5   6  -3  546.17   17.01
   5  -6   3  413.35   23.92
  -5   6   3  517.97   17.61
   5  -6  -3  551.77   17.65
  -5  -6  -3  415.74   24.61
  -5   6  -3  388.58   24.03
  -5  -6   3  495.52    6.83
   5  -6  -3  495.03   17.11
 -10  -2  -3    1.17    1.02
  10   2   3    0.84    1.27
  10  -2   3    2.71    4.03
  10   2  -3    1.31    1.17
 -10   2  -3    0.40    1.79
 -10   2   3    1.44    0.92
  10   2   3    5.43    3.80
  10  -2  -3    0.74    1.15
  10  -2   3    1.16    2.63
  10   2  -3    0.58    0.71
 -10   2  -3    0.18    0.62
  10   2  -3    0.71    1.21
  10  -2  -3    1.30    1.29
  -5   4  -5   14.01    8.07
  -5  -4   5   11.94    4.67
   5  -4   5   -1.87    2.50
  -5   4   5   12.82    3.11
   5   4   5   11.81    6.16
   5  -4   5    9.16    4.37
  -5   4   5   13.36    5.04
  -5   4  -5   14.56    6.92
   5   4   5    7.34    4.64
  -5  -4  -5    5.59    3.78
   5  -4  -5    7.65    4.27
   5  -4  -5   13.89    5.34
  -5  -4  -5    6.65    2.71
   5   4  -5   17.60    7.02
   5   4  -5    8.06    5.19
  -3  -3  -6    5.20    2.94
  -3   3  -6    3.02    1.93
   3   3  -6    5.50    4.00
  -3  -3  -6    6.54    3.03
   3  -3  -6    1.09    1.84
  -3   3   6   12.23    6.48
   3   3   6    0.62    1.02
  -3   3  -6    1.50    1.91
   3  -3  -6    1.16    1.55
   3  -3   6    4.16    1.30
  -3  -3   6    1.97    3.10
  -3   3   6    4.80    2.47
   3  -3   6   -0.49    3.58
   3   3   6    1.78    2.91
   3   3  -6    0.63    2.00
  -2  -5  -5   27.97   10.20
   2  -5  -5   28.61    7.31
   2   5   5   34.42    6.63
   2  -5   5   23.39    2.32
   2  -5  -5   21.16    5.39
  -2  -5  -5   27.78    8.90
   2   5  -5   27.41   10.46
  -2   5  -5   23.56    4.42
  -2  -5   5   20.56    5.59
   2   5  -5   31.53   12.89
  -2   5  -5   24.91   10.02
   2   5   5   24.22    3.47
  -2   5   5   34.06    5.87
   7   6  -1   29.33    5.23
  -7   6   1   32.66    6.87
   7  -6   1   30.05    5.56
   7   6  -1   38.33   10.77
   7  -6  -1   29.16    5.34
  -7   6  -1   35.49    6.59
   7   6   1   27.00    2.78
  -7  -6  -1   37.94   11.18
   7  -6  -1   28.96    6.92
   7  -6   1   33.33    6.99
  -7   6   1   33.30    7.71
  -7   6  -1   33.04    6.78
  -7  -6   1   33.35    6.62
  10  -4   0   18.70    7.58
  10   4   0   13.97    4.37
  10   4   0   17.96    8.62
 -10  -4   0   17.41    4.23
  10   4   0   17.38    3.79
  10  -4   0   19.02    5.88
 -10   4   0    7.38    3.06
   9   2  -4   16.44    5.81
   9  -2   4   21.43    7.72
   9   2   4   17.21    7.80
  -9   2   4   14.74    5.64
   9  -2   4    2.69    3.16
   9  -2  -4   12.41    5.42
   9   2   4   16.24    7.59
  -9  -2  -4   17.03    5.25
   9   2  -4   15.86    5.98
   9  -2  -4   16.55    7.22
  -9   2  -4   15.43    4.80
   9   2  -4   15.45   10.65
  -9   2  -4   14.72    4.56
   8   0  -5    0.79    1.60
  -8   0   5   -0.06    2.23
   8   0   5    3.90    4.38
  -8   0   5    0.36    0.63
   8   0   5    4.36    2.84
   8   0  -5   -0.06    1.55
  -8   0  -5    3.09    3.75
  -8   0  -5   -0.65    1.32
   9  -5   0   -0.92    2.33
   9   5   0    1.05    0.97
   9   5   0    3.41    1.39
  -9   5   0    0.71    1.14
  -9  -5   0    0.03    0.65
   9  -5   0    0.74    1.64
  -9   5   0    1.48    1.66
  -5   7   0    0.88    0.70
   5  -7   0    2.92    2.80
   5  -7   0    0.25    1.04
   5   7   0    2.87    2.95
   5   7   0    1.75    1.63
  -5  -7   0    1.30    1.12
  -5   7   0    0.56    1.94
  -8  -1   5    1.09    0.73
   8  -1   5    1.41    2.14
  -8   1  -5    1.96    2.12
  -8  -1   5   15.32    8.53
   8   1  -5    8.41    3.17
   8  -1  -5    6.75    3.29
  -8  -1  -5    3.51    3.47
   8   1   5    2.31    2.74
   8   1   5    1.07    1.54
  -8   1   5    0.67    2.05
   8  -1  -5    1.13    1.31
   8   1  -5    7.48    4.07
  -8   1  -5    4.45    2.66
  10  -4  -1   22.13    7.64
 -10   4   1   24.03    5.62
  10   4  -1   24.14    6.11
  10   4   1   22.32    7.67
  10  -4   1   24.18    9.59
  10   4  -1   15.62    6.42
  10  -4   1   22.89    9.95
  10  -4  -1   18.03    5.94
 -10   4  -1   19.12    3.41
  10   4   1   15.17    2.77
  10   4  -1   18.98    4.43
 -10  -4   1   17.51    2.87
  -5   2   6    8.64    4.65
  -5  -2  -6    6.10    3.65
   5  -2  -6    5.92    3.30
   5  -2   6    2.78    6.17
   5   2   6    9.44    3.96
  -5   2  -6    7.17    3.37
   5  -2  -6    8.31    3.47
  -5  -2  -6    8.34    4.17
   5   2  -6    6.29    4.84
   5   2   6   10.82    6.84
  -5  -2   6    1.75    1.14
  -5   2   6    5.14    2.81
  -5   2  -6    8.97    3.95
   5  -2   6    5.52    2.78
   3  -6   4    6.68    3.47
   3  -6  -4    3.12    2.37
   3   6   4    2.31    2.15
  -3   6  -4    0.54    2.03
  -3   6  -4    2.25    2.38
   3  -6  -4    7.23    2.96
  -3  -6  -4   10.30    2.59
   3   6  -4   14.50    3.11
  -3  -6   4    3.72    1.41
  -3   6   4    3.31    1.39
   3  -6   4    1.54    1.45
  -3  -6   4    7.74    4.45
  -3   6   4   16.50    5.00
   3   6   4    3.94    2.93
   3   5   5  193.77   16.43
  -3   5   5  206.31   17.82
  -3   5  -5  126.67   15.92
   3  -5  -5  122.70   11.15
   3  -5  -5  130.45   11.35
  -3   5  -5  127.37   18.43
   3   5   5  143.54   12.69
   3  -5   5  119.59   11.24
  -3  -5   5  118.74   10.34
   3  -5   5  134.68   11.40
   3   5  -5  113.76    8.93
  -3   5   5  137.63   13.45
  -3  -5  -5  126.42   13.40
  -3  -5  -5  124.15   11.29
   0  -7  -3   22.81    3.14
   0  -7   3   28.47    5.76
   0   7  -3   29.06    4.69
   0  -7  -3   30.45    5.41
   0   7  -3   26.04    6.49
   0   7   3   30.62    6.92
   0  -7   3   21.51    4.11
   0   7   3   33.23    8.28
  -6   5   4   75.29   12.34
  -6   5  -4   17.69    6.40
  -6  -5   4   36.65    5.71
   6  -5   4   20.69    7.04
  -6   5   4   49.27    8.73
   6  -5  -4   34.41   13.67
   6  -5   4   23.67    9.05
   6   5   4   16.23    4.31
   6   5  -4   14.76    3.44
   6   5  -4   65.92   14.69
  -6   5  -4   21.17    6.08
   6   5   4    8.70    4.66
  -6  -5  -4   14.55    3.71
  -6  -5   4   28.97    8.11
   6  -5  -4   58.78   12.65
 -11  -3   0    1.88    1.78
  11  -3   0    0.82    0.93
  11   3   0    2.82    4.01
  11  -3   0    1.20    2.09
 -11   3   0    8.48    3.78
  11   3   0   -0.09    2.24
 -11   3   0    4.70    1.27
  11   3   0    1.36    1.32
   6   0  -6  410.15   23.55
  -6   0   6  378.20   21.97
  -6   0  -6  411.52   28.51
  -6   0  -6  460.92   26.86
  -6   0   6  458.12   27.12
   6   0   6  446.89   26.53
   6   0   6  322.51   19.70
 -11  -2  -2   13.90    3.79
  11  -2  -2   11.92    7.08
  11   2  -2   13.85    6.06
 -11  -2   2   10.37    4.52
  11  -2  -2   21.76    8.33
  11  -2   2   15.61    8.43
  11  -2   2   14.01    6.15
  11   2   2   10.44    3.90
  11   2  -2   12.48    6.21
 -11   2  -2    8.15    3.97
 -11   2   2    4.17    4.32
 -11   2  -2   11.32    3.11
  11   2   2   10.00    3.89
  11   2  -2   12.43    3.50
  -1   7   3  613.62   18.38
  -1  -7  -3  566.77   17.92
  -1   7  -3  532.48   16.15
   1   7  -3  504.32   12.04
   1   7   3  619.37   18.37
  -1  -7  -3  545.58   15.34
   1   7   3  580.33   18.40
  -1  -7   3  575.81   17.01
   1  -7  -3  591.64   21.83
   1  -7   3  564.90   16.30
   1  -7  -3  592.96   18.49
   1  -7   3  573.38   17.23
   1   7  -3  647.19   21.71
  -1  -7   3  625.93   17.80
  -9   5  -1  139.67   13.55
   9  -5  -1  143.76   12.38
  -9  -5   1  133.85   10.66
  -9   5   1  140.13   12.17
   9   5  -1  124.62   10.79
   9   5   1  130.12   10.63
  -9   5  -1  138.89   12.44
   9   5  -1  159.76   14.62
   9   5   1  174.01   15.68
   9  -5   1  154.63   14.58
   9   5  -1  168.61   14.51
   9  -5  -1  147.09   12.05
   9  -5   1  145.16   13.01
  -9   5   1  133.74   11.15
  -9  -5  -1  139.79   11.50
   4  -7  -2  792.30   24.52
   4   7   2  784.42   22.69
   4  -7   2  764.57   22.30
  -4   7  -2  736.01   21.70
   4   7   2  744.21   21.74
   4  -7  -2  866.21   24.47
  -4  -7  -2  732.72   22.18
   4  -7   2  738.24   22.14
  -4   7   2  678.90   21.08
   5   7   1  604.87   18.73
   5   7  -1  728.37   21.50
  -5   7  -1  565.01   16.07
  -5   7  -1  614.91   21.05
  -5   7   1  720.99   22.67
   5   7   1  659.97   19.64
   5  -7   1  673.70   19.93
  -5  -7  -1  667.14   19.91
  -5  -7   1  650.84   19.95
  -5   7   1  598.04   16.67
   5  -7  -1  652.69   21.72
   5  -7   1  643.77   19.42
  -4   3   6   89.69   11.14
  -4  -3  -6   88.38    9.83
   4   3  -6   98.06   13.54
   4   3  -6   97.64   12.61
   4  -3  -6   92.86   12.33
  -4  -3  -6   93.07   10.79
  -4   3  -6   97.83   11.85
  -4   3   6   98.54   10.87
  -4  -3   6   95.43   11.14
   4  -3   6   91.40   10.57
  -4   3  -6   92.00   16.23
   4  -3   6   75.63    9.09
   4   3   6   85.88   12.60
   4   3   6   82.13    8.72
   4  -3  -6  104.22   10.76
   0   4   6   54.62    8.49
   0   4   6   61.47    6.68
   0  -4   6   63.83    7.58
   0  -4  -6   63.79    9.96
   0   4  -6   61.11    7.86
   0   4  -6   67.35   12.71
   0  -4  -6   61.65    8.31
  -7   3  -5   39.80   12.28
   7  -3  -5   53.12    9.21
   7   3   5   30.24    6.66
  -7   3   5   52.89   12.37
   7   3   5   32.09    4.74
   7  -3  -5   38.28    6.34
   7   3  -5   38.70    9.38
  -7  -3  -5   31.06   10.39
   7   3  -5   50.65    8.32
   7  -3   5   31.11    7.75
  -7  -3  -5   31.55    6.93
  -7  -3   5   43.65    7.56
   7   3  -5   41.31   16.13
  12   0   0  524.22   15.32
  12   0   0  381.48   23.48
 -12   0   0  386.38   22.40
   0   0  -7    0.58    0.88
   0   0   7    4.14    4.36
   0   0  -7    1.43    2.11
   0   0   7    5.03    3.45
  -6  -1   6  105.38   10.84
   6  -1   6   71.18   10.90
   6   1  -6  107.90   10.90
   6  -1  -6  106.61   10.87
   6   1   6  100.82   10.38
   6  -1  -6  125.34   15.08
  -6   1   6  136.88   12.36
  -6   1  -6   88.40   13.00
   6   1   6   81.25   12.24
  -6  -1  -6   86.95   13.83
   6   1  -6  121.64   11.35
   6  -1   6   97.24   12.43
  -6   1   6  141.67   13.20
   1   4  -6   16.24    8.00
  -1   4  -6   19.67    9.43
   1  -4  -6   20.20    7.72
  -1  -4  -6   20.13    6.28
  -1   4   6   17.79    5.47
  -1   4  -6   25.37   11.68
   1  -4   6   23.06    8.96
   1   4   6   21.70    6.45
  -1  -4   6    4.91    4.55
   1  -4  -6   21.07    7.62
  -1   4   6   11.13    2.75
  -1  -4  -6   15.82    3.07
   1   4   6   13.72    5.03
   1   4  -6   17.36    5.85
   9   4  -3  173.81   14.68
  -9   4  -3  176.33   15.22
   9   4   3  205.41   17.64
   9  -4   3  183.34   17.35
  -9   4   3  199.53   16.39
   9  -4  -3  191.94   16.88
   9   4   3  261.28   16.35
   9   4  -3  195.17   15.91
   9  -4  -3  179.96   15.62
  -9   4  -3  181.18   14.81
  -9  -4  -3  170.89   14.22
   9   4  -3  193.68   16.76
   9  -4   3  182.29   15.97
   9   4  -3  181.60   17.01
   9   4   3  188.25   14.72
  11  -3   1  105.40   12.86
  11  -3  -1  102.59   10.89
  11  -3   1  107.82   13.87
  11   3   1  101.84   11.57
  11   3  -1   93.77   11.10
 -11   3   1  111.75   11.43
 -11   3   1   98.03   10.59
 -11  -3   1  102.98    9.99
 -11  -3  -1   99.77    9.71
 -11   3  -1   89.81    9.18
 -11   3  -1  101.91   10.43
  11   3  -1  128.85   11.60
  11   3  -1   96.09   10.47
  -7  -6   2    5.40    2.21
  -7  -6  -2    2.42    4.50
   7   6  -2    7.71    3.64
   7  -6  -2    5.39    2.82
   7  -6  -2   11.46    8.75
  -7   6  -2   -1.11    3.78
  -7   6   2   -0.16    2.55
   7  -6   2    2.33    3.26
   7  -6  -2    1.77    2.55
  -7   6  -2   -0.33    1.82
   7   6   2    3.15    1.54
   7  -6   2   10.53    7.86
   7   6  -2    3.94    1.61
   7   6   2    4.05    2.23
   2   7   3    4.30    3.64
   2  -7   3   14.08    6.99
   2   7   3    8.23    4.95
  -2  -7   3   21.68    5.39
   2  -7  -3    4.13    1.13
   2  -7  -3    8.17    4.98
  -2  -7  -3    6.24    4.07
  -2  -7   3   15.60    3.55
  -2   7  -3    2.43    1.45
  -2   7  -3    2.38    3.95
  -2   7   3    4.49    1.59
   2   7  -3   21.80    5.10
   1   0  -7   26.39    9.23
  -1   0  -7   31.14    4.91
   1   0  -7   26.33    3.62
  -1   0  -7   32.71    7.93
   1   0   7   46.13   15.07
  -1   0   7   24.62    6.86
  -1   0   7   31.18    7.53
 -12   1   0  496.68    8.82
  12   1   0  454.33   28.25
 -12  -1   0  498.42   10.86
  12  -1   0  465.20   26.42
  12   1   0  593.75   18.62
   0  -1  -7    1.75    0.96
   0   1   7    0.66    1.44
   0   1  -7    0.97    1.14
   0   1  -7   -2.11    2.47
   0  -1   7   -3.20    3.07
   0   1  -7    2.63    2.41
   0   1   7    1.36    1.45
   0  -1  -7    2.36    3.39
   6   6   3    3.14    2.37
  -6   6   3    1.75    2.35
   6  -6  -3    9.19    3.29
   6   6   3    0.53    4.03
  -6  -6   3    0.42    1.15
   6  -6  -3    4.47    2.46
  -6   6  -3    1.28    0.97
  -6  -6  -3    2.71    2.46
  -6  -6  -3    0.94    1.11
   6  -6   3    2.24    1.74
  -6   6   3    2.01    1.39
   6   6  -3    6.30    3.30
   6  -6   3   -0.31    2.82
   6   6  -3    2.97    2.23
   6   6  -3   -0.29    0.82
  -6   6  -3    1.17    1.99
  12   0   1    1.11    3.36
 -12   0   1   -0.94    1.02
  12   0  -1    0.91    1.43
  12   0   1    0.33    2.99
 -12   0  -1    0.72    1.60
  12   0  -1    1.24    2.30
 -12   0   1    1.84    1.55
   8   2  -5   47.91   16.39
   8   2   5   28.79    8.80
   8  -2  -5   43.00    7.18
  -8  -2   5   36.24    6.47
   8  -2  -5   53.24   12.60
   8   2  -5   38.75    8.35
   8  -2   5   40.37   17.28
   8  -2   5   28.17    7.82
  -8  -2  -5   34.41    7.41
  -8   2  -5   36.25    7.37
  -8   2  -5   29.02    8.36
  -8   2   5   56.96   10.66
   8   2   5   42.19   14.11
   8   2  -5   35.17    7.05
 -10   0   4  766.76   22.32
  10   0   4  862.21   25.54
  10   0  -4  714.60   22.04
  10   0  -4  781.55   23.20
   6   4  -5    9.10    4.05
   6  -4  -5    1.07    2.15
   6  -4  -5    1.22    1.81
   6   4   5    5.18    2.76
  -6  -4   5    3.28    1.68
   6   4   5    2.87    1.79
  -6   4   5    2.70    1.15
  -6  -4  -5    4.96    2.44
  -6   4   5    4.12    3.21
   6  -4   5    5.44    2.79
  -6   4  -5    4.53    4.92
  -6  -4  -5    2.26    3.10
  -6   4  -5    1.19    1.33
   6   4  -5    4.63    4.74
  11   0  -3    2.37    5.85
  11   0  -3   14.40    5.01
  11   0   3   10.27    5.15
 -11   0   3   10.12    4.69
  11   0   3   12.14    5.09
 -11   0  -3   14.11    4.95
  -4  -6  -4    3.63    2.16
   4   6   4    1.98    1.89
  -4  -6   4    9.02    3.86
  -4   6   4    8.10    3.89
   4   6   4    4.53    2.00
  -4   6  -4    3.93    2.96
   4  -6  -4    9.89    4.41
   4  -6   4    9.70    3.70
   4   6  -4    9.52    4.18
  -4  -6   4    6.00    2.28
  -4   6   4    7.30    3.41
   4  -6  -4    9.81    4.38
  -4   6  -4    9.34    3.43
   4   6  -4    6.82    2.95
  -4  -6  -4    2.81    1.82
 -10   3  -3   68.58    8.75
  10   3  -3   82.18    8.99
  10   3  -3   77.36    8.83
  10   3   3   75.03    8.05
  10  -3   3   66.12   13.93
  10   3  -3   81.95   10.94
  10   3  -3   78.91   10.75
  10   3   3   75.24   13.30
 -10   3   3   83.34   10.47
  10  -3  -3   85.75   11.20
 -10  -3  -3   75.47    8.62
  10  -3  -3   84.63   11.89
 -10   3  -3   81.33    9.95
  10  -3   3   82.35   15.87
  -2  -4   6  264.36   17.66
   2  -4   6  280.66   18.89
   2   4   6  265.55   17.09
  -2   4   6  245.45   14.49
   2   4   6  216.79   17.52
  -2   4   6  234.53   14.54
   2  -4  -6  262.99   17.11
  -2  -4  -6  238.63   14.90
  -2   4  -6  227.54   19.51
   2   4  -6  227.72   19.65
   2  -4   6  206.56   16.32
  -2   4  -6  239.75   21.05
  -2  -4  -6  265.74   16.19
   2   4  -6  298.21   19.54
   2  -4  -6  229.73    8.50
   1  -1  -7  166.67   18.34
  -1  -1  -7  152.95   12.73
  -1  -1  -7  155.90   17.11
   1  -1  -7  157.59   13.57
  -1   1  -7  174.69   20.43
  -1  -1   7  141.52   14.72
   1   1   7  198.99   17.03
  -1   1   7  160.61   13.95
  -1   1   7  161.02   13.82
   1   1   7  175.22   15.12
  -1   1  -7  171.10   18.46
   1  -1   7  154.52   15.32
   1   1  -7  169.84   15.32
  -1   1  -7  146.07   12.39
   4   5  -5  100.63   14.54
   4  -5   5  100.74    9.88
  -4  -5   5  100.39   10.05
   4   5   5  140.81   13.52
  -4   5  -5   96.57   12.82
  -4   5   5  109.26   11.45
  -4  -5  -5   94.91   10.82
   4   5  -5   91.24   11.02
   4  -5  -5  103.48   11.12
   4  -5   5  105.03   10.84
  -4   5  -5   83.07    9.40
   4   5   5   98.93   10.16
   4  -5  -5   99.62   10.65
  -4  -5  -5   96.14   11.36
  -4   5   5   95.34   14.22
   8  -6   0   29.57    8.52
   8  -6   0   28.32    3.85
   8   6   0   40.29   10.60
  -8  -6   0   37.17   11.28
   8   6   0   29.42    4.83
  -8   6   0   35.51    7.11
  -8   6   0   36.39    6.76
  -2   0  -7    1.70    2.03
   2   0   7   -0.01    5.26
  -2   0   7   -1.48    2.88
   2   0  -7    2.73    2.56
   2   0  -7   -0.09    0.94
  -2   0  -7    0.55    0.92
  -8   4  -4    3.04    2.25
  -8   4  -4    8.67    3.66
   8   4   4    4.83    1.65
   8   4  -4   43.47    7.01
   8   4   4    4.01    4.73
   8  -4   4    8.28    4.97
  -8  -4  -4    6.18    3.73
  -8   4   4   62.58   10.95
   8  -4   4    7.25    5.55
   8   4  -4   11.02    3.06
   8  -4  -4   40.63    7.72
   8  -4  -4   29.88    7.52
   8  -5  -3    2.03    1.52
   8   5  -3    1.12    1.19
   8  -5  -3    1.90    1.37
  -8   5  -3   -0.39    1.84
   8   5   3    2.25    0.82
   8   5  -3    4.27    3.02
   8   5  -3    2.55    1.53
   8  -5  -3    0.43    0.56
   8   5  -3    0.09    1.43
   8  -5   3   -0.10    1.78
  -8  -5  -3    1.74    1.74
  -8   5  -3    2.73    2.85
  -8  -5  -3    1.47    1.28
   8   5   3    0.81    3.09
  -8   5   3   -0.02    1.18
   8  -5   3    0.41    2.09
  -9   3   4    0.23    0.90
  -9   3  -4    0.47    2.04
   9   3   4    1.46    2.91
  -9  -3  -4    2.75    2.47
   9   3  -4   13.04    3.51
   9   3  -4   11.67    7.75
   9  -3  -4    0.54    2.57
   9   3  -4    2.65    2.27
  -9   3  -4    0.58    1.74
   9  -3   4    1.17    1.33
   9  -3  -4   -0.64    1.98
   9   3  -4    1.69    1.33
   9  -3   4   -0.08    2.76
  10  -4   2   13.08    4.02
  10   4  -2    9.70    3.60
  10  -4  -2   11.20    6.23
  10   4  -2    6.19    2.51
  10  -4  -2    9.41    5.52
  10   4   2    2.24    3.31
  10  -4   2   12.36    4.52
  10   4   2    7.78    2.31
  10   4  -2    5.57    2.72
  10  -4  -2    6.87    3.10
 -10   4   2   12.44    3.55
  10   4  -2    8.05    2.69
 -10   4  -2    8.77    2.64
 -10  -4  -2    8.25    2.72
  12  -1  -1    1.10    2.36
  12  -1   1    0.82    4.01
 -12  -1   1    2.79    1.53
 -12  -1   1   -0.05    0.73
 -12   1   1    3.15    2.54
  12   1  -1    3.11    2.19
  12   1  -1    5.78    3.80
  12  -1   1    4.57    2.91
  12  -1  -1    1.12    0.65
 -12  -1  -1    1.05    1.82
  12   1   1    2.68    1.54
 -12   1  -1    4.33    2.33
 -10   1   4  263.15   18.10
 -10   1  -4  201.51   16.33
  10   1  -4  220.06   19.06
  10  -1  -4  282.31   18.52
  10  -1   4  237.26   18.70
  10   1  -4  290.15   17.45
  10   1   4  226.13   19.59
  10  -1   4  234.79   16.05
 -10  -1  -4  230.78    7.19
 -10   1  -4  226.27   22.03
  10   1  -4  223.95   17.69
  11   1  -3  217.50   17.26
 -11  -1  -3  213.36   17.48
  11  -1  -3  209.86   18.10
 -11  -1   3  252.95   15.11
  11   1  -3  217.30   18.37
  11   1  -3  207.33   17.12
  11   1   3  254.22   19.55
  11   1   3  284.23   19.77
  11  -1   3  201.41   18.82
 -11   1  -3  210.65   17.20
  11  -1  -3  210.23   17.92
 -11   1   3  204.93   16.75
   0   8   0 2380.22   63.06
   0  -8   0 2358.84   62.60
  -3   7   3   14.20    3.43
  -3  -7  -3   15.45    7.47
  -3  -7  -3    4.35    3.24
   3  -7   3    6.06    3.05
  -3  -7   3    6.05    2.29
   3   7   3    3.87    3.00
   3  -7  -3   13.37    3.84
  -3   7   3   12.52    7.44
   3   7  -3   22.65    7.62
   3   7  -3    5.52    2.82
   3  -7   3    2.44    1.38
  -3   7  -3    3.98    2.14
   3  -7  -3    6.82    4.31
  -3   7  -3    2.50    2.01
   3   7   3    2.26    1.99
  -6   7   0   23.19    5.52
  -6  -7   0   22.53    7.36
   6  -7   0   27.38    9.76
   6   7   0   18.38    4.88
  -6   7   0   17.20    2.85
   6  -7   0   18.38    3.97
   2   1   7   -0.75    2.42
   2   1  -7    3.21    3.95
   2  -1   7   -1.87    3.88
   2  -1  -7    1.24    1.50
  -2   1  -7    0.74    1.95
   2   1   7    1.33    2.71
  -2   1   7    1.19    1.21
  -2   1  -7    0.75    0.93
  -2  -1  -7    1.33    1.19
  -2  -1   7    1.21    2.73
   2  -1  -7    1.24    0.73
  -2  -1  -7    2.31    2.97
  -2   1  -7    3.92    2.25
   1   8   0   48.14   11.59
  -1   8   0   50.55   13.50
   1   8   0   57.96   11.91
   1  -8   0   37.89    8.87
  -1  -8   0   33.53    9.39
  -1   8   0   36.83    7.86
  -8   6   1    7.61    4.17
   8  -6   1   10.25    4.68
  -8  -6   1    6.45    4.82
  -8  -6   1    8.64    2.46
   8   6  -1    8.95    3.93
  -8   6  -1    8.46    3.70
   8  -6  -1    7.01    4.47
   8   6   1    7.06    2.99
   8  -6   1    5.76    3.00
   8  -6  -1    7.39    3.22
  -8  -6  -1    7.41    2.45
  -8  -6  -1   12.21    3.82
   8   6  -1    8.13    3.53
   8   6   1    8.03    3.33
  -8   6  -1    7.27    2.62
  -8   6   1   -0.06    1.65
   9  -5  -2   -0.02    0.98
   9  -5  -2   -0.73    2.27
   9   5   2   -2.76    4.93
   9   5  -2   -0.60    1.70
  -9   5  -2    0.50    0.91
  -9   5   2   -0.23    1.77
   9   5   2    0.80    0.58
   9   5  -2    1.88    2.16
   9   5  -2    1.20    1.20
  -9   5  -2    0.28    0.88
  -9  -5  -2    0.91    1.44
   9  -5   2    2.80    2.80
  -9  -5  -2    0.81    1.10
   9   5  -2    0.67    1.00
   9  -5   2    2.76    1.92
   6   2   6   11.59    5.70
   6   2   6   12.83    5.70
  -6   2   6    7.45    3.24
   6   2  -6   11.96    5.41
   6  -2   6   11.12    5.50
   6   2  -6   10.17    5.51
   6  -2  -6    5.00    7.89
  -6  -2  -6    8.42    5.41
  -6  -2  -6   20.51    8.33
   6  -2  -6    9.40    4.28
   6  -2   6    9.31    4.01
  -6  -2   6   12.37    3.97
  -6   2  -6    7.39    3.67
  -6   2  -6   10.76   10.36
  -6   2   6   10.36    4.75
  -5  -7   2    5.88    2.86
   5  -7   2    3.24    2.18
   5  -7  -2    6.25    2.93
   5  -7   2    5.40    3.29
   5   7   2    5.37    3.34
  -5   7   2    2.70    2.85
  -5   7   2    9.80    2.92
   5  -7  -2    3.91    1.74
   5   7  -2    8.87    3.77
   5   7  -2    6.81    2.63
  -5   7  -2    1.37    1.48
  -5   7  -2    2.02    2.40
   5  -3   6   75.09   11.09
   5  -3  -6   81.90   10.21
   5  -3  -6  102.53   15.67
   5   3  -6   79.04   12.39
  -5   3  -6   94.23   15.65
   5   3   6   97.09    9.82
  -5   3   6   78.36    8.95
   5   3   6   81.64   13.09
   5  -3   6   68.46    8.33
  -5  -3  -6   91.22   11.82
  -5  -3  -6   87.68   10.49
  -5   3  -6  100.42   11.92
   5   3  -6   76.21   11.09
  -5   3   6  107.00   14.46
  -5  -3   6   82.66    9.29
   3   4  -6   59.33   10.73
   3  -4   6   53.39    7.59
  -3  -4   6   51.55    7.73
  -3   4   6   86.54   10.29
   3  -4  -6   61.59   10.15
  -3  -4  -6   66.69   11.48
  -3   4   6   64.70   10.66
  -3  -4  -6   62.74    7.56
   3   4  -6   60.43    9.75
  -3   4  -6   51.75   14.65
   3   4   6   60.05    4.00
   3   4   6   61.98    7.01
  -3   4  -6   62.19    9.24
   3  -4  -6   71.99    8.31
   0   8   1    2.83    2.77
   0   8   1    2.39    2.71
   0  -8   1    1.19    1.14
   0  -8  -1    2.02    2.93
   0   8   1    2.14    0.81
   0   8  -1    0.20    0.60
   0   8  -1    9.40    2.91
  12   2   0  176.50   16.38
  12  -2   0  180.05   15.53
 -12  -2   0  169.39   13.66
 -12   2   0  177.61   14.31
 -12   2   0  173.76   14.16
  12  -2   0  191.55   15.45
  -3   0  -7  185.96   19.05
   3   0  -7  193.59   16.31
  -3   0  -7  202.26   17.08
   3   0  -7  186.24   14.86
   3   0   7  165.98   14.34
  -3   0   7  194.51   16.49
  -3   0   7  172.93   15.63
  -6   7  -1   15.67    6.04
   6  -7  -1   15.47    2.34
  -6   7   1   11.08    6.27
   6  -7   1   12.04    2.16
   6   7   1   15.08    2.34
   6   7   1   13.47    6.55
  -6   7   1   10.29    4.17
   6   7  -1   18.52    7.58
  -6  -7  -1   17.55    7.24
  -6  -7   1   19.77    6.26
   6   7  -1   20.10    7.44
   6  -7  -1   17.47    7.05
   6  -7   1   17.42    7.24
  -6   7  -1   10.99    2.84
   0   2   7   22.06    5.76
   0  -2   7    2.72    3.16
   0   2  -7    1.35    2.40
   0   2  -7    1.12    3.00
   0   2   7   -0.38    2.04
   0  -2  -7    0.61    1.07
 -11   3   2    1.00    1.58
  11   3   2    1.41    1.55
  11   3  -2    2.49    1.49
 -11   3  -2    4.47    1.68
  11   3  -2    0.50    3.01
  11   3   2    7.84    4.48
  11   3  -2    2.25    1.30
 -11   3  -2    4.55    1.93
 -11  -3  -2    6.17    3.02
  11  -3  -2    3.84    2.75
  11  -3   2    6.17    2.69
  11  -3   2    4.62    3.25
  11  -3  -2    3.20    1.65
  11   3  -2    2.72    1.52
  -1   8   1   10.41    2.17
   1  -8   1   11.93    5.64
  -1  -8  -1    9.92    6.76
   1   8  -1   15.56    4.30
   1  -8  -1   12.01    5.31
   1   8   1   10.85    4.19
  -1   8  -1   15.49    7.39
  -1   8   1    8.43    3.46
   1   8   1    7.09    3.87
   1   8  -1   11.05    3.98
  -1  -8   1    8.64    3.00
  -2  -8   0   36.74    9.93
   2  -8   0   30.61    6.12
  -2   8   0   41.42   11.90
   2   8   0   35.81   10.44
  -2   8   0   37.21    7.91
  -2   8   0   38.11    8.31
   2   8   0   31.60    5.95
   9   0   5  285.32   18.69
  -9   0  -5  285.71   17.17
  -9   0   5  360.50   21.80
  -9   0  -5  216.47   18.81
   9   0  -5  299.49   18.24
   9   0  -5  328.45   20.12
  -7   5  -4   29.56    7.18
  -7  -5  -4   36.32   11.54
   7  -5   4   27.88    5.63
  -7   5   4   25.36    4.06
   7  -5  -4   21.14    5.63
  -7  -5   4   24.17    3.07
   7  -5   4   14.93    7.78
   7   5   4   29.94    5.52
  -7   5   4   27.23    6.95
   7   5   4   29.76    5.98
  -7   5  -4   29.36   10.37
   7   5  -4   32.06   12.95
   7  -5  -4   24.57    7.02
   7   5  -4   25.41    5.52
  -7  -5  -4   10.48    5.80
   1  -2   7    4.35    2.56
  -1   2  -7   12.01    3.84
   1  -2  -7   10.50    4.31
   1   2   7   12.05    4.75
  -1   2   7    8.00    4.66
  -1   2   7   11.95    4.72
  -1  -2  -7    9.86    3.17
  -1   2  -7    8.53    4.00
   1  -2  -7    8.91    3.60
  -1  -2  -7    8.34    3.58
   1   2   7   15.97    5.02
   1   2  -7    9.44    5.57
   1   2  -7   14.74    4.56
  -1  -2   7    8.55    4.00
   7   0   6   -0.67    2.25
   7   0   6    0.51    2.43
   7   0  -6    0.16    1.49
  -7   0  -6    2.87    2.30
  -7   0   6    0.82    3.12
  12   0  -2  509.37   13.87
  12   0   2  568.78   19.39
  12   0  -2  455.76   27.86
  12   0   2  488.02   28.88
  12   0  -2  393.92   24.07
 -12   0   2  510.59   14.93
 -12   0  -2  444.34   25.52
   3   1  -7  151.54   16.39
  -3   1  -7  175.60   18.07
  -3  -1  -7  154.32   18.89
  -3   1  -7  167.61   13.43
  -3  -1  -7  170.90   15.13
   3  -1  -7  157.12   13.64
  -3  -1   7  143.65   12.58
   3  -1   7  149.31   14.68
  -3   1   7  155.12   13.77
   3  -1  -7  154.84   15.35
   3   1   7  153.63   14.34
   3   1  -7  189.11   17.13
  -3   1  -7  160.60   14.91
   3   1   7  146.49   13.19
  -3   1   7  166.19   13.68
 -12   2  -1    3.35    2.12
  12   2   1   -0.20    1.86
  12  -2   1    1.81    2.09
  12   2  -1   -0.19    3.22
  12  -2   1    3.63    3.22
  12  -2  -1    0.82    2.52
 -12  -2  -1    1.36    0.91
 -12  -2   1    1.15    1.02
  12   2  -1    2.93    2.51
 -12   2   1    2.71    2.08
  12  -2  -1    3.67    1.45
 -12   2   1    3.15    1.71
 -12   2  -1    1.18    0.78
 -12  -2   1    3.53    1.19
   5  -6  -4   72.60   12.65
  -5  -6   4   38.45    8.13
   5   6   4   17.73    7.42
  -5  -6  -4   28.32    6.63
   5  -6   4   34.86    7.27
  -5  -6   4   44.23    8.42
   5  -6   4   28.68    5.53
  -5  -6  -4   31.37   11.89
   5  -6  -4   37.12    9.88
  -5   6   4   60.99    9.09
  -5   6   4   57.73   11.73
   5   6   4   31.11    8.37
  -5   6  -4   28.63    8.76
   5   6  -4   77.70   19.91
  -5   6  -4   25.53    8.02
   5   6  -4   45.03    7.79
  10   2  -4    5.27    3.59
  10   2   4    3.76    3.38
  10   2  -4    1.99    2.21
  10  -2  -4    5.64    2.84
 -10   2  -4    5.22    3.10
  10   2   4    0.55    2.82
 -10   2  -4    2.57    1.00
 -10   2   4    5.04    2.79
  10   2  -4    3.51    1.29
  10  -2   4    5.13    5.00
  10  -2  -4    1.97    1.40
  10  -2   4    3.94    2.36
 -10  -2  -4    1.00    1.17
 -11   2  -3    1.28    1.21
 -11   2   3    4.19    1.92
  11   2   3    3.01    2.74
  11   2  -3    1.46    0.93
  11   2   3    0.87    1.73
  11  -2  -3    1.53    1.33
 -11  -2   3    1.64    1.25
 -11  -2  -3    1.42    1.64
 -11   2  -3    2.06    1.53
  11  -2   3    2.66    2.12
  11   2  -3    0.78    0.78
  11  -2   3    2.41    3.34
  11  -2  -3   -0.59    2.33
  11   2  -3    0.82    1.32
  -2  -8   1    7.81    3.80
  -2   8   1   17.69    7.09
  -2  -8  -1    8.74    3.96
   2   8   1    5.71    3.71
   2   8  -1   13.69    6.55
  -2   8   1    5.89    2.51
   2  -8  -1    9.16    4.34
  -2   8  -1    6.87    6.40
   2   8  -1   10.13    3.70
  -2   8  -1    3.26    1.70
   2  -8   1    8.86    3.98
   2  -8   1    8.92    2.86
   2   8   1    7.76    4.35
  -2   8   1   17.89    3.52
  -9   1   5   88.77    9.44
  -9  -1   5   96.08   10.32
   9  -1   5   85.24   10.73
   9   1  -5   86.22   10.00
   9  -1  -5   97.34   11.13
  -9   1  -5  103.76   12.87
   9  -1   5  110.42   15.14
  -9   1  -5   92.74   12.18
   9   1   5  140.81   13.52
  -9  -1  -5  106.55   20.27
   9   1  -5   95.45   14.08
   5   5  -5   95.29    9.78
  -5  -5  -5   94.28   10.19
   5   5   5  107.17   12.56
  -5   5   5  106.31   11.01
   5  -5   5   98.94    9.78
   5   5   5  114.53    5.51
   5  -5  -5  100.68   12.88
  -5  -5   5   95.54   11.07
  -5   5  -5  108.98   15.79
  -5   5  -5  100.94   12.82
   5   5  -5  101.11   19.03
  -5   5   5  114.64    5.68
  -5  -5  -5   96.59   11.51
   5  -5  -5   93.48   10.44
  -4  -7  -3    7.37    3.25
  -4  -7  -3    6.86    2.60
   4  -7   3   12.17    6.01
   4   7  -3   20.90    7.39
  -4   7   3   11.56    2.71
   4  -7   3    8.07    4.13
   4   7  -3    7.11    3.06
   4   7  -3   19.95    5.44
   4   7   3    5.43    2.99
  -4   7  -3    5.24    2.76
   4   7   3    8.73    4.08
  -4  -7   3    7.82    3.02
   4  -7  -3   13.32    3.89
   4  -7  -3   16.03    6.03
  -4   7  -3    5.52    2.62
  -4   7   3   18.22    8.41
  -7   1  -6    1.27    1.53
   7  -1  -6    2.77    1.40
   7   1  -6    1.10    1.19
  -7  -1  -6    2.43    3.45
   7  -1   6   16.00    9.57
   7  -1   6    0.96    2.28
   7   1  -6    0.52    1.99
   7  -1  -6    0.46    0.89
   7   1   6    0.76    1.41
  -7  -1   6    1.22    0.99
  -7   1  -6    1.76    2.15
  -7   1   6    0.36    0.57
   7   1   6    0.31    1.08
   7   1   6    3.85    2.32
  -7  -1   6    2.84    2.23
  -7   1   6    0.52    1.18
  -2   2   7   15.58    8.75
   2  -2   7    2.25    2.37
   2   2   7    4.31    2.35
  -2  -2  -7    3.42    1.89
   2   2  -7    6.02    2.79
   2  -2  -7    8.32    4.21
  -2   2  -7   -1.35    2.94
  -2   2  -7    2.58    1.47
   2   2  -7    2.93    2.37
  -2  -2  -7    4.85    1.81
   2  -2  -7    3.17    1.45
  -2  -2   7    5.38    3.48
   2   2   7    1.69    2.97
  -2   2   7   15.90    4.77
   0   6  -5    1.17    3.58
   0  -6  -5    0.96    2.02
   0  -6   5    1.81    2.34
   0   6   5    0.61    1.53
   0   6   5    1.78    1.66
   0  -6  -5    0.83    1.40
   0   6  -5    0.98    2.11
   0  -6   5    0.32    0.67
 -12  -1   2   40.11    6.77
  12   1   2   36.10   13.10
  12  -1   2   56.07   11.74
  12   1  -2   40.37    8.91
  12   1   2   33.87    7.27
 -12   1   2   34.67    7.55
  12  -1   2   34.77    8.62
  12   1  -2   50.25    7.53
  12  -1  -2   40.14    6.35
 -12  -1  -2   40.82    8.82
  12  -1  -2   38.31    9.46
 -12   1  -2   39.14    8.21
  12  -1  -2   35.94    8.43
  12   1  -2   28.09    5.58
  11   4   0    1.87    3.81
 -11   4   0    0.26    1.17
  11  -4   0   -0.27    1.72
  11   4   0   -1.10    1.66
  11   4   0    1.34    1.51
  11  -4   0   -0.00    2.24
 -11  -4   0   -0.11    0.83
  10  -5   0  602.82   18.49
  10   5   0  687.18   21.86
 -10   5   0  604.61   17.71
 -10  -5   0  560.84   15.89
  10   5   0  674.88   21.69
  10  -5   0  569.45   17.47
  10   5   0  565.90   17.57
 -10   5   0  574.03   16.98
  -8  -3   5    9.47    4.09
   8  -3   5    6.61    3.59
   8   3  -5   14.55    6.81
  -8  -3  -5   10.21    3.96
   8   3  -5    8.72    6.62
   8  -3  -5   12.70    6.82
  -8   3  -5    9.63    3.37
  -8   3  -5   11.39    3.71
   8   3   5    8.36    3.47
  -8   3   5   15.50    6.01
   8  -3   5    2.90    9.17
   8   3  -5    9.14    3.76
   8   3   5    8.18    5.94
   8  -3  -5    8.47    3.97
   3   8   0    0.75    2.67
  -3   8   0    1.93    2.10
  -3  -8   0    0.43    0.63
   3  -8   0    0.18    1.45
  -3   8   0   -0.20    0.70
   3   8   0    0.35    1.27
   1  -6   5    5.79    3.98
  -1  -6  -5    7.49    3.02
  -1   6   5    8.46    3.29
   1   6   5   11.29    4.66
  -1  -6  -5    8.79    3.87
   1  -6  -5   10.30    3.85
  -1  -6   5    5.29    2.17
  -1   6  -5    4.67    2.59
  -1  -6   5    4.91    3.22
   1  -6   5    4.01    1.82
  -1   6   5    8.18    4.49
   1  -6  -5    5.32    2.72
   1   6  -5    3.23    5.47
  -1   6  -5    6.94    4.15
   1   6   5    1.41    1.79
   1   6  -5    0.65    5.21
   4   4   6    8.69    4.97
  -4   4   6   20.08    5.72
  -4   4   6    5.53    3.11
   4  -4  -6    2.96    4.23
   4   4  -6   23.98    9.44
  -4   4  -6    6.11    3.60
  -4  -4  -6    6.06    3.81
   4  -4   6   -0.98    2.58
  -4  -4   6    8.43    3.24
   4  -4   6    4.52    1.83
   4  -4  -6   13.62    8.54
  -4  -4  -6    2.16    3.07
   4   4   6    3.33    3.37
  -4   4  -6    5.40    4.42
   7  -6   3  388.95   22.77
   7   6  -3  370.98   23.72
  -7   6   3  427.14   24.79
   7  -6   3  368.29   22.69
   7   6   3  398.56   22.89
  -7   6  -3  381.15   23.18
  -7  -6  -3  387.06   24.13
  -7  -6   3  405.91   23.26
   7   6  -3  444.73   26.73
  -7   6  -3  397.35   24.95
  -7  -6  -3  337.32   20.27
   7   6  -3  379.80   21.79
   7  -6  -3  442.40   25.89
  -8   6   2  311.02   20.09
   8   6  -2  299.34   17.81
   8  -6   2  275.20   16.96
   8  -6  -2  381.43   22.58
   8   6  -2  293.27   22.40
  -8  -6  -2  286.98   17.88
  -8  -6  -2  354.24   22.68
   8  -6  -2  331.01   18.84
   8   6   2  273.51   16.16
  -8   6  -2  283.75   17.39
  -8   6  -2  281.33   17.36
   8   6  -2  359.31   22.59
  -7   4   5   22.47    8.65
   7   4   5   14.32    2.90
  -7   4  -5   16.88    5.42
   7   4  -5   19.89    6.20
   7   4  -5   23.66    8.42
  -7   4  -5   14.90    5.74
   7  -4   5   15.78    5.71
   7   4  -5   20.96    5.14
   7  -4  -5   25.79    8.73
   7  -4   5   11.33    4.06
  -7  -4  -5   15.15    4.53
  -7  -4  -5   12.61    4.67
   7  -4  -5   15.24    7.60
  -7  -4   5   18.05    3.93
   7   4   5   15.62    6.54
   4   0  -7    0.41    1.72
   4   0  -7   -0.05    0.99
  -4   0   7   -0.00    3.29
  -4   0   7   -0.40    1.23
  -4   0  -7    3.55    3.85
   4   0   7   -0.90    3.95
  -4   0  -7    0.67    0.75
  11   4  -1  134.89   12.15
 -11   4   1  124.28   11.17
 -11  -4  -1  111.17   10.69
  11   4  -1  121.45   18.03
  11   4   1  132.96   12.93
  11   4  -1  109.40   11.55
  11  -4   1  138.93   13.30
  11   4   1  106.56   13.04
  11   4   1  104.78   10.61
 -11   4  -1  122.93   11.58
  11  -4  -1  113.51    6.01
 -11  -4   1  123.46   10.07
  11  -4  -1  130.75   13.10
  11  -4   1  122.16   13.80
  10  -5   1   93.15   10.00
 -10   5   1   94.63    9.92
  10   5  -1   78.50    9.20
  10  -5  -1   91.51    9.46
 -10  -5  -1  100.21   10.42
 -10   5  -1   98.33   14.00
 -10   5   1   99.29   12.29
  10   5   1   85.55    9.53
 -10   5  -1   97.53   11.22
  10   5  -1  108.62   14.81
  10  -5   1   83.21    8.93
  10  -5  -1   88.55    9.63
  10   5   1  117.08   20.59
  10   5  -1  100.70   12.34
  10   5   1  118.61   10.97
 -10  -5   1   88.91    8.58
   0  -8  -2  256.28   15.69
   0   8  -2  336.90   22.56
   0  -8   2  321.35   19.42
   0   8   2  276.00   17.42
   0   8   2  342.94   20.40
   0   8  -2  238.66   15.16
   0  -8  -2  281.69   18.20
   3   8   1  177.19   15.60
  -3  -8  -1  166.88   14.46
   3   8   1  178.79   15.35
   3   8  -1  199.65   17.65
  -3   8   1  177.83   14.12
  -3   8  -1  196.50   18.66
   3  -8   1  182.03   15.80
   3  -8  -1  205.94   17.56
   3   8  -1  199.52   18.31
  -3   8   1  211.84   18.62
  -3  -8   1  174.83   15.93
   3  -8   1  182.32   15.64
  -3   8   1  185.29   16.02
   0  -7  -4    2.93    2.53
   0  -7   4    0.73    1.42
   0   7  -4    3.24    3.11
   0   7   4    1.32    1.68
   0   7   4   -0.95    1.42
   0  -7   4    2.46    2.37
   0   7  -4    1.97    2.69
   0  -7  -4    0.26    0.75
  -2   6   5    7.81    2.97
  -2  -6   5    4.11    2.81
   2  -6  -5    6.47    3.18
   2  -6  -5    8.04    3.70
   2   6   5    4.50    2.90
   2   6  -5    3.49    4.37
   2   6   5    6.29    3.87
  -2   6  -5    1.58    1.90
  -2  -6   5    5.19    2.11
  -2  -6  -5    5.11    2.68
   2  -6   5    4.82    1.45
  -2   6   5    5.95    2.49
  -2   6  -5    5.43    2.83
   2   6  -5    6.81    6.16
  -2  -6  -5    4.94    2.67
   2  -6   5    7.88    3.52
  -6   7  -2  185.45   15.60
   6   7  -2  241.85   16.42
   6   7   2  189.96   16.19
  -6   7  -2  171.16   14.51
   6  -7   2  219.56   18.11
   6  -7  -2  255.70   16.11
  -6  -7  -2  194.82   16.51
  -6  -7   2  210.25   18.96
   6   7  -2  325.80   20.78
   6  -7   2  231.51    9.54
   6   7   2  241.74   14.92
   6  -7  -2  300.85   17.96
  -6   7   2  308.93   19.25
  -1   8  -2    0.92    1.00
   1   8   2    3.20    2.61
  -1   8   2    5.51    2.28
   1  -8  -2    1.55    3.21
  -1  -8   2    2.55    1.73
   1   8   2    3.81    3.01
  -1  -8  -2    5.36    3.01
   1  -8  -2    3.01    1.75
  -1  -8  -2    2.22    1.39
  -1   8   2    4.94    2.71
   1  -8   2    2.94    2.59
   1  -8   2    7.44    2.94
   1   8  -2    5.51    2.68
  -1   8  -2    3.37    1.97
  -4  -1  -7    8.14    4.19
   4  -1  -7    6.08    3.01
  -4  -1  -7    7.91    2.92
  -4   1  -7    6.79    4.84
   4   1  -7    4.37    1.65
   4   1  -7    8.90    4.64
   4  -1   7    3.90    3.68
  -4   1   7    2.05    4.11
  -4   1   7   -0.66    1.90
   4   1   7    3.15    2.40
   4  -1  -7    1.82    1.63
  -4   1  -7    3.56    4.06
  -3  -2   7    1.51    1.46
   3  -2   7    0.24    0.98
   3  -2  -7    3.87    2.23
   3  -2  -7    1.37    2.01
  -3   2   7    1.18    1.79
   3   2   7    1.10    2.96
  -3   2  -7    2.58    1.67
   3   2  -7    6.30    4.36
  -3  -2  -7    1.62    1.42
  -3  -2  -7    2.50    2.58
   3  -2   7   -0.27    3.85
   3   2  -7   -0.44    2.38
  -3   2   7    1.81    1.53
   3   2   7    0.62    1.41
  -1   7   4    8.59    3.23
   1  -7   4    7.60    3.70
  -1  -7   4    7.52    3.14
   1   7   4   11.41    3.06
   1  -7  -4    8.66    3.43
   1   7   4    7.86    3.65
  -1  -7  -4    8.95    3.36
   1   7  -4    9.16    3.21
  -1  -7   4    4.47    3.29
   1  -7   4    7.05    3.75
   1   7  -4    6.49    3.34
  -1   7  -4    5.87    4.02
  -1   7   4   13.12    4.78
  -1  -7  -4   10.40    4.54
  -1   7  -4    9.86    3.69
  -6   3   6  162.89   13.18
   6   3  -6  178.92   17.20
  -6  -3  -6  133.88   15.77
   6   3  -6  195.81   19.68
  -6   3  -6  121.13   15.66
   6  -3  -6  191.83   16.71
   6   3   6  145.85   12.03
   6  -3  -6  167.67   14.42
  -6  -3  -6  151.64   15.82
  -6  -3   6  152.87   12.82
   6  -3   6  117.99   10.59
   6   3   6  163.49   14.10
   6  -3   6  147.44   13.77
  -7  -7   0    4.99    3.40
   7   7   0    2.29    1.77
   7   7   0    1.87    1.39
   7  -7   0    6.76    3.76
  -7   7   0   -0.81    1.95
  -7   7   0    0.50    0.56
  10  -4  -3    4.67    2.20
  10   4   3    4.08    3.75
  10   4  -3    4.79    1.84
  10   4  -3    7.91    4.00
  10   4  -3    7.74    4.92
  10   4   3    4.13    0.98
 -10   4  -3    3.40    1.43
 -10  -4  -3    4.08    1.38
  10   4  -3    4.71    1.47
 -10   4   3    4.63    1.54
  10   4   3    8.11    4.42
  10  -4   3    1.69    2.74
  10  -4  -3    1.42    1.76
  10  -4   3    6.36    3.08
 -10   4  -3    3.27    2.15
   9  -2   5   17.52    7.23
  -9   2  -5   15.99    7.91
  -9  -2   5   18.88    4.67
   9   2   5   11.31    4.92
  -9   2  -5    9.45    3.76
  -9   2   5   20.57    9.47
   9   2   5    6.77    3.37
   9  -2  -5   11.37    4.23
   9   2  -5   24.00   12.27
   9   2  -5   13.92    3.90
  -9  -2  -5   14.13    4.25
   9  -2  -5   10.54    8.51
   9   2  -5   18.41    4.92
   9  -2   5   15.31    4.50
   7  -2  -6   13.24    3.84
   7   2  -6   14.52    5.35
  -7   2   6    9.44    2.53
   7  -2   6   11.78    4.88
  -7  -2   6    5.65    2.85
   7   2  -6   15.97    6.30
   7   2   6    6.51    4.05
   7   2   6    8.42    2.86
  -7   2   6   12.91    6.93
  -7   2  -6   17.80    8.36
  -7   2  -6    6.50    3.67
   7  -2   6    5.20    4.68
   7   2  -6   11.29    2.89
   7  -2  -6    7.17    3.49
  -7  -2  -6   11.86    5.32
  -7  -2  -6    9.15    3.72
   0  -5   6    2.13    2.99
   0  -5  -6    3.57    2.70
   0   5   6   -1.39    1.97
   0  -5  -6    0.81    1.30
   0   5  -6    2.72    2.39
   0   5   6    2.18    2.57
   0   5  -6    5.77    3.92
 -12  -3   0  328.86   19.05
  12   3   0  303.84   17.90
 -12   3   0  308.14   17.69
 -12   3   0  351.55   20.51
  12   3   0  333.63   21.10
  12  -3   0  286.23   17.63
  12  -3   0  293.24   17.52
 -12  -2   2    1.72    1.68
  12   2  -2    0.82    0.67
  12   2   2    1.41    1.81
 -12   2  -2    2.87    1.48
  12   2  -2    1.50    1.98
  12  -2  -2    4.36    2.16
 -12  -2  -2    1.48    1.34
  12  -2   2    0.63    1.11
  12   2   2    1.63    1.40
  12   2  -2    4.18    2.93
  12  -2   2    3.58    2.95
  12  -2  -2    3.61    2.67
 -12   2  -2    0.65    0.80
 -12   2   2    1.33    1.15
  -9   6   0    4.79    1.51
  -9  -6   0    0.02    0.31
   9  -6   0    0.99    1.68
   9  -6   0    1.41    1.47
   9   6   0    0.75    1.22
  -9   6   0    0.29    1.14
   9   6   0    0.17    1.15
  -9  -6   0    2.06    1.84
   0   3  -7    1.87    2.27
   0   3  -7    4.18    3.83
   0  -3  -7    3.29    3.49
   0  -3   7    7.38    3.52
   0   3   7    1.26    2.04
   0   3   7   -0.43    1.56
   0  -3  -7    2.13    2.61
   9   4  -4   51.19   16.52
   9   4  -4    2.25    1.95
  -9  -4  -4    3.53    1.71
   9  -4  -4    1.90    3.24
   9   4   4   -0.57    0.76
  -9   4   4    2.55    3.14
   9   4  -4    1.71    3.20
   9   4   4   -0.03    2.60
   9  -4  -4   15.08    8.46
   9  -4   4    1.46    2.28
  -9   4  -4    1.49    1.75
   9  -4   4    0.57    2.80
  -1  -5  -6   12.83    5.69
  -1   5  -6   13.19    4.45
   1   5   6   22.08    9.39
   1   5  -6   16.68    5.54
   1   5   6   17.64    8.04
  -1  -5  -6   12.59    5.65
   1   5  -6   15.60    5.15
   1  -5  -6   13.04    6.99
  -1   5   6   16.89    9.89
   1  -5  -6   13.94    4.68
  -1   5   6   18.69    7.51
   1  -5   6   -0.53    2.71
  -1  -5   6   10.96    2.87
  -1   5  -6   14.52    8.02
   2   8   2   23.01    6.80
  -2   8   2   34.42    7.20
   2  -8  -2   23.33    4.30
  -2   8  -2   26.79    6.27
  -2   8   2   28.46    8.15
   2  -8  -2   31.02    9.49
  -2  -8   2   28.80    7.22
   2  -8   2   27.50    7.25
   2   8  -2   32.60    5.68
   2  -8   2   26.42    3.74
  -2  -8  -2   33.49   12.81
   2   8  -2   36.45   12.05
   2   8   2   23.84    3.55
   4   8   0   65.10   12.99
  -4  -8   0   62.51    7.37
   4  -8   0   54.51    8.31
  -4   8   0   54.86    7.51
   4   8   0   64.90    9.54
   4  -8   0   57.79    8.37
  -4   8   0   60.60    5.51
  -2  -7  -4  711.78   21.24
  -2  -7  -4  729.64   20.47
  -2   7  -4  665.85   23.18
  -2   7   4  671.67   19.36
   2   7   4  687.99   21.27
   2  -7   4  773.34   23.32
   2   7   4  660.22   19.77
   2  -7  -4  612.45   17.68
  -2  -7   4  713.94   19.74
   2  -7   4  720.01   20.01
  -2  -7   4  658.86   19.27
  -9   5  -3  167.99   14.32
   9   5   3  166.31   13.30
  -9   5   3  170.10   14.25
   9   5  -3  155.56   13.36
   9   5  -3  158.67   12.93
  -9  -5  -3  152.15   12.76
  -9   5  -3  149.63   12.76
   9   5  -3  136.55   12.06
   9  -5  -3  155.32   13.52
   9  -5   3  156.97   14.16
   9   5  -3  181.89   16.69
  -9  -5  -3  159.72   15.38
   9  -5  -3  166.19   14.83
   9  -5   3  177.01   15.54
  -5   7  -3   61.66    9.48
   5   7   3   56.11    8.01
   5  -7   3   59.31    8.97
  -5  -7   3   62.50    7.88
  -5   7  -3   70.01   11.63
  -5   7   3   67.31    7.68
   5   7  -3   64.19   10.24
  -5   7   3   58.86    8.46
   5  -7  -3   75.55    8.64
   5   7  -3   56.55    9.66
  -5  -7  -3   51.09    7.34
   5  -7   3   58.66    9.15
   5   7   3   80.42    8.68
  -5  -7  -3   64.94    7.45
   5  -7  -3   58.71   10.51
   5   7  -3   57.90    9.51
  -1   3   7  161.83   13.56
   1   3   7  165.85   13.81
   1   3   7  146.98   14.87
  -1   3  -7  144.31   15.04
  -1   3  -7  147.35   18.88
   1  -3  -7  146.18   16.78
   1   3  -7  138.59   15.23
  -1  -3  -7  147.25   16.08
  -1  -3  -7  147.81   13.72
   1  -3  -7  148.69   12.50
  -1   3   7  140.94   12.55
   1   3  -7  134.38   18.79
   1  -3   7  134.34   12.73
  -1  -3   7  138.38   13.23
  -7  -7  -1   64.02    8.76
   7   7   1   73.10   11.81
   7  -7   1   64.73    7.18
   7  -7  -1   54.57    7.89
   7  -7  -1   72.30    8.05
  -7  -7   1   61.16    8.43
   7   7  -1   60.42    4.70
   7  -7   1   63.51    7.81
  -7   7  -1   64.18    9.15
   7   7   1   59.27    8.73
  -7   7   1   68.51    9.54
  -7   7   1   62.07    8.98
   7   7  -1   63.08    8.95
  -7   7  -1   65.72    8.22
  -3  -6  -5  230.29    7.51
  -3   6  -5  239.45   19.60
   3  -6  -5  265.85   16.10
   3  -6  -5  252.71   16.05
   3  -6   5  251.01   14.93
  -3  -6   5  291.10   17.74
  -3   6   5  251.48   14.93
   3   6   5  328.49   20.27
  -3   6  -5  187.15   19.34
   3   6  -5  254.62   16.12
   3  -6   5  231.18   14.44
  -3  -6  -5  236.14   15.30
  -3  -6   5  226.75   17.67
   3   6   5  230.15    9.29
  -6  -6   4 1578.61   41.47
  -6  -6  -4 1828.00   49.70
   6  -6   4 1597.59   43.15
   6  -6  -4 1852.99   50.52
   6   6  -4 1775.25   46.78
   6  -6  -4 1770.18   48.57
  -6   6  -4 1684.50   46.21
  -6   6  -4 1647.24   45.54
   6   6   4 1672.88   44.37
  -6   6   4 1764.37   47.33
   6  -6   4 1689.81   47.24
   6   6  -4 1858.40   52.22
 -12  -3  -1    2.64    1.24
  12  -3   1    3.38    2.03
 -12   3  -1    1.64    1.61
  12   3  -1    2.30    0.95
  12  -3  -1    4.66    2.05
  12  -3   1    7.88    3.85
  12   3   1    6.61    4.96
  12   3  -1    0.71    3.64
 -12   3   1   -0.02    1.00
 -12   3  -1    1.86    1.66
 -12  -3   1    5.16    2.30
 -12   3   1    2.91    2.32
  12   3  -1    4.28    3.37
 -11   0  -4    1.61    2.07
 -11   0   4    1.11    1.67
  11   0  -4    0.52    1.29
  11   0   4    0.45    2.45
  11   0   4    1.27    2.06
  11   0  -4    0.27    1.78
  10  -3   4    2.59    3.90
  10   3   4    4.18    3.10
 -10  -3  -4    2.78    1.87
  10  -3   4    0.99    1.83
  10   3  -4    6.58    3.20
 -10   3  -4    1.96    1.69
  10  -3  -4    1.52    2.78
 -10   3  -4    3.31    2.60
  10  -3  -4    1.78    1.81
  10   3  -4    0.64    0.95
  10   3   4    0.73    2.61
 -10   3   4    2.52    2.80
  -6  -5  -5    0.55    1.46
   6  -5  -5    3.39    2.22
   6   5  -5    1.06    2.75
  -6   5  -5    0.43    1.57
  -6   5   5    2.06    1.61
  -6  -5  -5    3.06    3.38
   6   5   5    2.19    1.64
  -6  -5   5    1.04    0.93
   6  -5   5   -0.04    1.32
  -6  -5   5    1.44    1.39
   6  -5  -5    1.41    1.99
   6   5  -5    2.12    2.01
   6   5   5    0.16    3.84
  -6   5  -5    2.65    2.69
  -6   5   5    1.94    0.84
  -9   6   1  421.84   24.72
   9  -6  -1  420.96   24.63
   9   6   1  507.82   11.32
   9   6   1  438.49   25.35
   9   6  -1  429.03   26.23
  -9  -6   1  405.53   22.71
  -9   6  -1  452.43   26.16
   9  -6  -1  483.36   28.04
  -9  -6   1  417.60   24.58
  -9   6  -1  435.19   25.76
   9  -6   1  443.73   25.88
   9  -6   1  426.53   25.72
  -9  -6  -1  471.06   28.27
   9   6  -1  463.86   27.34
  -9  -6  -1  449.54   25.28
  -9   6   1  423.92   24.97
 -11   3   3  206.52   19.27
 -11   3  -3  174.88   14.63
  11   3  -3  170.00   18.11
  11   3  -3  180.96   14.73
  11  -3  -3  181.11   17.51
  11  -3   3  186.64   15.89
 -11   3  -3  151.06   15.18
  11   3  -3  180.08   15.91
  11  -3  -3  173.65   18.11
 -11  -3  -3  173.46   15.44
  11  -3   3  170.19   16.50
  11   3   3  188.51   18.67
  11   3  -3  185.81   17.31
  -5   4  -6   22.88    7.51
  -5   4  -6   16.79   10.28
   5   4  -6   15.14    5.21
  -5   4   6   19.18    5.11
   5   4   6   11.81    5.58
   5   4   6   14.28    4.34
  -5  -4  -6   14.45    6.10
   5  -4   6   11.67    5.65
  -5   4   6   14.98    5.96
   5  -4   6   20.00    6.07
   5  -4  -6   13.92    5.90
  -5  -4  -6   12.80    4.78
  -5  -4   6   13.89    5.00
   5  -4  -6   12.95    4.94
   5   4  -6   16.87    8.35
  -2   5  -6  282.08   19.68
  -2   5  -6  316.21   20.44
  -2  -5  -6  277.16   17.42
   2   5  -6  309.87   18.90
  -2   5   6  394.41   23.06
  -2  -5   6  296.37   19.21
   2  -5  -6  334.31   19.91
   2  -5   6  292.66   16.71
   2   5  -6  320.17   21.14
  -2   5   6  305.49   18.66
   2   5   6  345.87   20.75
   2   5   6  435.38   26.11
   2  -5   6  314.34   22.07
   2  -5  -6  302.42   19.41
  -2  -5  -6  295.12   18.59
   4  -8  -1    9.05    3.89
  -4   8  -1    3.63    2.51
   4   8  -1   14.23    8.43
  -4  -8  -1   10.29    5.24
  -4  -8   1    4.88    2.37
   4   8   1    5.41    3.14
   4  -8   1   11.04    6.92
  -4   8   1    7.83    3.17
  -4   8   1   18.29    7.49
  -4   8   1   13.54    3.62
   4   8  -1    9.93    2.39
   4   8   1    5.06    4.17
   4  -8   1    9.18    5.95
  13   0   0   -1.68    3.62
 -13   0   0   -0.49    0.71
  13   0   0    1.23    1.16
   5   0   7   28.66   11.81
  -5   0   7   30.92   13.79
  -5   0   7   35.40    9.70
  -5   0  -7   25.20    8.12
   5   0  -7   19.22    6.44
   2   3  -7    4.89    3.31
   2  -3   7    0.42    0.81
  -2   3   7   -0.11    2.69
   2   3   7    0.90    2.73
  -2  -3  -7    1.24    2.36
   2   3  -7    1.52    2.74
   2   3   7    2.15    2.93
  -2  -3  -7    1.26    0.81
  -2   3  -7    2.02    4.26
  -2   3  -7    0.28    1.23
   2  -3  -7    1.39    2.23
   2  -3  -7    2.11    0.70
  -2   3   7   -0.02    1.76
  -8   5  -4  202.69   16.90
   8  -5  -4  193.35   16.27
   8   5   4  168.47   15.15
   8  -5   4  208.46   17.91
   8  -5   4  199.49   18.04
   8  -5  -4  196.70   17.23
  -8  -5  -4  202.40   17.57
  -8  -5  -4  189.75   15.79
  -8   5  -4  196.27   16.91
   8   5  -4  186.71   21.09
  -8   5   4  204.54   17.71
   8   5  -4  190.68   15.90
  -8   5   4  172.38   13.57
   8   5  -4  186.02   15.39
   8   5  -4  241.69   15.84
  -4   2   7    1.15    0.86
   4  -2  -7    0.31    0.83
  -4  -2  -7    4.54    1.83
   4   2  -7    1.49    1.44
   4  -2  -7    0.73    1.43
   4  -2   7    3.11    2.44
   4   2   7    1.12    2.44
   4   2   7    0.61    3.38
  -4  -2   7    1.61    2.60
   4   2  -7    4.61    3.08
  -4  -2  -7    0.91    1.40
   4  -2   7    1.17    1.88
  -4   2  -7    5.49    2.61
  -4   2   7   -0.86    2.40
  -8   0   6  500.59    9.46
   8   0   6  429.52   26.66
  -8   0  -6  393.14   24.02
  -8   0   6  559.08   18.17
  -8   0  -6  417.86   24.48
   8   0  -6  556.66   19.38
   8   0  -6  501.26   10.53
  11  -4   2   16.23    6.93
 -11   4  -2   11.46    3.32
  11  -4   2   13.29    5.07
  11  -4  -2   12.52    4.24
  11   4  -2   10.00    2.67
  11   4  -2    9.02    3.21
  11  -4  -2    9.33    8.34
  11   4   2    9.62    5.22
 -11  -4  -2   11.24    3.62
 -11   4   2   13.93    3.88
  11  -4  -2    8.30    3.10
  11   4  -2   11.95    3.73
  11   4  -2   13.56    3.85
  10  -5   2  397.37   24.05
  10  -5   2  331.42   20.39
  10  -5  -2  376.28   21.93
  10   5  -2  392.45   22.82
  10   5   2  486.13   30.62
  10   5  -2  331.70   21.04
 -10   5  -2  343.42   20.22
 -10  -5  -2  356.47   20.57
  10   5   2  354.00   20.74
  10   5  -2  368.79   21.25
 -10   5  -2  356.56   21.15
  10  -5  -2  367.68   22.14
 -10   5   2  387.43   22.94
  10   5  -2  392.19   24.46
  11  -1   4    4.52    2.83
 -11   1  -4    2.23    1.93
  11   1  -4    9.62    3.86
  11  -1   4    5.92    3.72
 -11   1   4    1.62    2.11
  11   1  -4   10.00    4.96
  11  -1  -4    4.76    2.65
  11  -1  -4    2.25    2.36
  11   1  -4    3.79    1.92
 -11   1  -4    0.09    0.79
 -11  -1  -4    4.85    3.37
  11   1   4    0.97    2.54
  11   1   4    1.89    1.60
 -11  -1   4    0.05    2.40
  12   0   3    3.76    3.26
 -12   0   3    0.49    1.63
 -12   0  -3    0.63    1.74
  12   0  -3    0.48    0.52
  12   0   3   -0.39    2.77
  12   0  -3    0.96    1.53
  12   0  -3    1.40    1.57
   3  -8  -2    1.37    2.72
   3   8  -2   -0.31    2.44
  -3   8  -2    0.21    0.48
   3  -8  -2    0.01    0.62
  -3   8   2    1.91    1.57
  -3   8  -2   -0.23    2.00
  -3  -8  -2   -0.29    2.40
   3  -8   2    1.52    1.68
   3   8  -2    1.06    1.57
  -3   8   2   -0.94    1.34
   3   8   2   -0.15    2.16
   3  -8   2    1.75    1.81
   3   8   2    1.15    2.81
  -3  -8   2    1.65    2.11
   3  -7   4   28.80    5.27
  -3  -7   4   33.72    8.83
   3   7   4   19.07    7.14
   3   7   4   16.76    7.81
  -3   7   4   25.87    5.72
  -3   7   4   22.45    7.35
  -3  -7   4   24.03    5.72
   3   7  -4   56.58   17.24
  -3   7  -4   26.10    7.17
  -3  -7  -4   24.94    7.89
   3   7  -4   40.63    9.60
  -3   7  -4   17.28    4.52
  -3  -7  -4   26.74    5.16
   3  -7  -4   16.34    6.58
  13   1   0    1.44    1.61
  13  -1   0    0.63    1.76
 -13   1   0   -0.36    1.87
  13   1   0    0.80    1.95
 -13  -1   0    0.45    0.89
  -5  -1   7  124.63   11.08
   5   1   7  136.92   12.22
   5   1  -7  136.84   12.03
   5  -1  -7  149.54   15.41
   5  -1  -7  134.09   14.12
   5   1   7  138.89   14.08
  -5  -1  -7  137.75   17.41
  -5  -1  -7  139.63   13.67
  -5   1  -7  125.13   19.40
   5  -1   7  163.85   16.63
  -5   1  -7  136.19   16.87
   5  -1   7  127.54   15.75
  -5   1   7  191.44   16.06
  -5   1   7  186.06   16.29
   5   1  -7  152.12   13.42
 -13   0  -1   96.72   12.12
 -13   0   1   90.33    9.44
  13   0  -1  136.26   12.50
  13   0  -1   82.45   10.25
  13   0   1  120.11   10.40
 -13   0   1   94.53   10.65
   8   1   6  145.95   17.82
  -8   1  -6  192.90   18.91
  -8  -1   6  172.71   16.23
   8   1   6  219.14   23.39
  -8  -1   6  175.50   15.68
   8  -1  -6  167.88   14.23
   8   1  -6  160.98   13.30
   8  -1   6  208.20   17.89
   8  -1  -6  189.55   16.28
  -8   1   6  213.76   24.23
   8   1  -6  175.12   17.47
  -8  -1  -6  164.83   14.86
  -8   1  -6  197.02   20.52
   8  -1   6  228.81   10.41
   8   1   6  255.38   15.54
  12  -1  -3    3.44    2.99
 -12   1   3    1.56    1.38
 -12  -1   3    3.13    1.64
  12   1  -3    1.25    0.91
  12   1   3    2.42    2.02
  12  -1   3    3.59    4.53
  12  -1   3    3.65    5.00
  12   1   3    3.54    1.61
 -12  -1  -3    2.59    2.03
  12   1  -3    1.62    2.37
  12  -1  -3    1.68    2.86
  12   1  -3    6.99    3.07
 -12   1  -3    4.73    2.44
  10   0  -5    1.46    2.37
  10   0  -5    1.28    3.35
 -10   0  -5    6.36    4.25
 -10   0  -5    4.37    2.44
  10   0   5    3.10    3.93
 -10   0   5    0.43    1.73
  10   0   5    0.91    2.23
   3  -5  -6    4.90    3.41
  -3   5   6    2.42    4.08
   3   5   6   -0.51    2.01
  -3   5  -6    8.25    5.07
  -3   5  -6    3.03    4.84
   3   5  -6    1.13    0.92
   3   5  -6    2.40    1.83
  -3  -5  -6    0.88    2.92
   3  -5   6    1.38    0.90
   3  -5  -6    0.83    2.27
  -3  -5   6    0.11    1.93
  -3  -5  -6    1.00    1.61
   3   5   6   -2.33    2.97
  -4  -6   5    1.12    0.67
  -4  -6  -5    2.92    3.27
   4  -6  -5    1.20    2.17
   4  -6   5    3.67    2.15
   4   6   5   -0.14    3.01
  -4  -6   5    0.83    2.38
  -4  -6  -5    1.50    2.31
   4  -6   5   -0.17    2.48
   4   6  -5   11.24    5.03
  -4   6  -5    0.90    1.68
  -4   6   5    2.69    2.27
   4   6   5    0.39    1.30
  -4   6   5    2.20    1.84
   4   6  -5    3.96    2.35
  -4   6  -5    1.36    2.34
   4  -6  -5    0.75    2.04
 -13  -1   1   69.70    8.96
 -13  -1  -1   70.44    8.56
 -13   1  -1   72.83   12.71
  13   1  -1   36.28    5.90
  13  -1  -1   61.85   10.67
  13  -1   1   74.22   13.81
  13   1  -1   70.21    9.72
  13  -1   1   78.41   11.50
 -13   1   1   63.68    8.11
  13   1   1   79.85    8.45
  13  -1  -1   74.19    9.88
 -13   1  -1   55.48    8.36
  -3   3  -7  262.56   20.96
  -3   3   7  322.17   18.72
   3  -3   7  297.30   19.04
   3   3   7  348.41   20.98
   3   3  -7  286.76   20.15
   3   3  -7  291.47   19.12
   3  -3  -7  321.52   20.28
   3  -3  -7  301.50   19.04
   3   3   7  316.56   18.96
  -3  -3  -7  299.19   19.98
   3  -3   7  262.77   15.71
  -3  -3  -7  320.14   19.10
  -3   3  -7  322.28   20.19
  -3  -3   7  274.00   16.76
  -8   6  -3    0.92    2.56
   8   6  -3    5.19    5.10
   8  -6   3    2.11    1.79
  -8  -6  -3    0.99    1.52
   8  -6   3   -0.17    2.63
   8   6   3    3.32    2.87
  -8  -6   3    1.33    0.73
   8  -6  -3    1.04    1.34
   8   6  -3    1.19    1.82
  -8   6   3    0.40    2.07
  -8   6  -3    2.47    1.85
   8   6   3   -0.03    0.67
   8  -6  -3    0.68    0.76
   5   8   0    1.69    3.80
   5  -8   0    6.29    3.43
  -5  -8   0    0.06    1.83
   5  -8   0    1.02    1.79
  -5   8   0   -0.43    0.94
   5   8   0    6.22    4.04
  -5   8   0    4.57    2.70
   8   4  -5    5.08    2.34
   8  -4   5    8.71    5.56
   8   4   5    4.35    2.62
  -8   4   5    8.82    4.15
  -8   4  -5    2.43    2.14
  -8  -4  -5    4.11    4.38
   8  -4  -5    4.15    2.75
   8   4  -5    6.81    4.57
  -8  -4   5    3.80    2.26
   8   4  -5    5.80    2.97
  -8   4  -5    4.94    3.14
   8  -4   5    5.04    3.60
   8  -4  -5    2.89    4.24
  -8  -4  -5    2.59    1.94
  -7   7  -2    1.40    2.40
   7  -7  -2    2.57    1.69
  -7   7   2    1.43    1.81
   7  -7   2    2.47    2.79
   7  -7  -2    0.26    0.81
   7   7   2    0.60    1.45
   7  -7   2    1.66    3.27
  -7   7  -2    1.29    1.39
   7   7  -2    0.70    1.50
   7   7  -2    2.92    3.70
  -7  -7   2    1.31    0.91
   7  -7  -2    0.75    1.31
   7   7   2    2.34    1.72
  -9  -3   5  192.91   16.22
  -9   3   5  218.01   18.21
  -9   3  -5  198.76   16.64
   9  -3   5  299.38   19.90
   9  -3  -5  216.40   18.88
   9  -3   5  227.86   18.88
   9   3  -5  198.61   16.34
   9   3  -5  192.21   20.23
  -9  -3  -5  232.67    9.21
   9   3  -5  209.80   18.19
   9   3   5  328.32   21.71
   9  -3  -5  209.74   20.74
  -9   3  -5  216.19   20.15
 -10   1   5    2.00    1.62
 -10  -1   5    0.86    1.81
  10   1  -5    6.53    4.54
 -10  -1  -5    2.90    2.39
  10   1   5    3.04    8.85
 -10  -1   5    1.77    0.99
  10   1   5    4.66    4.27
  10  -1   5    0.93    1.48
  10   1  -5    6.87    4.66
  10  -1  -5    3.03    2.82
  10  -1   5    6.41    4.57
 -10   1  -5    4.45    3.68
  10   1   5   -2.01    1.00
 -10   1  -5    0.02    0.98
  -7  -3   6    8.44    3.98
  -7  -3  -6    9.19    4.44
   7   3  -6   13.80    6.79
  -7   3   6    7.15    4.59
  -7   3  -6   11.51    3.38
   7  -3  -6    6.34    5.89
   7   3  -6    6.26    2.58
   7  -3   6    9.71    3.86
  -7   3   6    9.25    2.31
  -7  -3  -6   10.59    4.92
   7   3   6    9.28    4.21
   7   3   6    5.65    3.24
   7   3  -6   12.03    4.44
   7  -3  -6    8.67    3.72
   7  -3   6   10.25    4.41
   0  -8  -3    3.43    6.86
   0  -8   3   11.75    7.71
   0   8  -3   10.19    4.82
   0  -8  -3   -0.03    0.90
   0   8  -3    6.46    5.96
   0   8   3    1.92    2.33
   0  -8   3   21.80    8.74
  12  -3  -2   21.27    3.43
  12   3   2   10.87    9.72
  12   3  -2   26.62    5.52
 -12   3   2   23.55    6.93
 -12   3  -2   28.31    5.82
 -12  -3  -2   32.56   10.22
  12  -3   2   26.94   10.26
  12   3  -2   28.85    9.52
  12  -3  -2   35.51    9.86
  12   3  -2   28.69    7.41
  12   3  -2   23.22    4.17
  12  -3  -2   42.02   11.49
  12  -3   2   31.17   11.29
 -12   3  -2   15.97    5.66
  -9   6   2    1.21    1.39
   9   6  -2    2.34    1.98
  -9  -6  -2    1.39    1.59
   9  -6  -2    3.98    3.09
  -9   6  -2    5.48    2.84
   9   6  -2    0.32    1.24
   9  -6  -2    8.19    4.13
  -9   6  -2    1.33    2.52
   9   6   2   -0.08    0.88
   9   6  -2    1.26    1.19
   9  -6  -2    0.99    1.21
   9  -6   2    2.90    3.08
   9  -6   2    3.12    3.08
   9   6   2    5.79    2.89
  -9  -6   2    2.80    1.97
  -9  -6  -2    6.93    4.05
  -6  -7   3    0.99    1.48
   6  -7   3    1.27    2.46
   6  -7  -3    5.81    2.94
   6  -7   3    3.96    2.74
   6   7   3   13.83    7.38
  -6   7   3    2.51    3.22
  -6  -7  -3   14.85    9.53
   6   7  -3    2.53    1.96
  -6   7  -3    2.71    3.79
  -6   7   3    4.53    1.32
  -6  -7  -3    8.98    3.34
   6   7   3    5.21    3.77
   6   7  -3    8.29    5.82
   6  -7  -3    5.83    2.96
   6   7  -3    3.84    1.08
  -6   7  -3    0.26    2.25
   1  -8  -3   67.69   10.77
  -1   8  -3   62.68   10.43
  -1  -8   3   60.20    7.64
  -1   8   3   80.13    9.02
  -1   8  -3   62.08   13.78
  -1  -8  -3   68.76   14.44
   1  -8   3   66.40    7.43
  -1   8   3   58.82   11.19
   1   8   3   66.40    7.64
  -1  -8   3   64.52    9.14
   1   8  -3   56.07   11.55
   1  -8  -3   62.94    8.17
  -1  -8  -3   53.74    8.27
   1   8   3   67.81   12.09
  11   2   4   -1.34    3.06
 -11  -2  -4    4.94    3.72
  11   2   4   -0.69    2.97
  11  -2   4    0.13    2.90
 -11   2   4   -0.94    1.63
  11   2  -4   19.37    8.39
  11  -2  -4   -0.09    1.67
  11  -2   4   -0.21    2.69
  11  -2  -4    0.35    1.67
 -11   2  -4   -0.48    1.32
 -11   2  -4    2.20    1.07
  -4   8   2   24.13    4.61
  -4   8  -2   25.28    5.53
   4  -8  -2   25.55   10.03
   4   8   2   24.30    8.81
  -4  -8  -2   18.07    3.37
   4  -8   2   18.64    4.38
   4  -8   2   25.88    3.81
  -4   8   2   25.61    7.21
   4  -8  -2   28.43    6.49
   4   8   2   26.22    9.55
  -4  -8   2   18.21    5.46
   4   8  -2   32.76   11.52
  -5  -8  -1   80.53    9.35
   5  -8   1   70.11   14.31
   5   8  -1   78.73    9.25
  -5   8   1  107.32   15.98
   5   8   1   70.47    8.17
  -5   8  -1   67.91    7.78
  -5  -8   1   70.11   11.61
   5   8   1   75.86    8.83
  -5   8   1   69.20    7.15
   5  -8  -1   87.33   14.32
   5   8  -1  112.22   12.08
  -5   8  -1   68.01    8.23
   5  -8   1   83.43    9.01
  -4  -7  -4  307.67   18.07
   4  -7  -4  338.68   21.81
  -4   7   4  298.69   18.16
   4   7   4  301.24   18.58
  -4  -7   4  314.09   18.12
   4   7  -4  290.29   17.45
   4  -7   4  318.39   19.14
   4   7   4  364.97   21.58
   4  -7   4  299.64   17.51
  -4  -7   4  326.02   20.40
  -4   7   4  335.98   20.41
  -4  -7  -4  301.72   19.34
  -4   7  -4  308.68   19.39
   4   7  -4  355.95   23.58
  -4   7  -4  269.46   16.73
  13   2   0    1.74    2.98
 -13   2   0    0.74    1.46
 -13   2   0   -0.06    0.93
  13  -2   0    1.93    1.28
  13  -2   0    1.28    3.38
 -13  -2   0    0.90    0.86
  13   2   0    0.83    1.14
   8   7   0  270.93   17.78
   8  -7   0  274.46   16.33
   8  -7   0  289.26   17.71
  -8  -7   0  264.73   16.36
  -8   7   0  264.76   16.28
  -8   7   0  269.87   15.94
   8   7   0  291.88   20.99
   5  -2  -7   70.35    9.53
  -5  -2   7   57.97   12.55
   5   2   7   64.95    9.64
   5   2   7   69.09    7.65
  -5   2   7   79.87    9.32
  -5   2   7   96.39   11.00
  -5   2  -7   54.24   11.49
  -5   2  -7   61.57    9.27
  -5  -2  -7   63.41   10.71
   5   2  -7   66.61    9.44
   5  -2   7   49.25   11.07
   5  -2   7   45.93   10.59
  -5  -2  -7   55.61   11.76
   5  -2  -7   55.72   11.31
   8   2  -6   16.77    6.38
   8   2  -6   13.71    4.94
  -8  -2   6   15.13    5.03
   8  -2   6   15.35    5.24
   8  -2  -6   14.05    4.60
   8   2  -6   17.14   13.33
  -8   2  -6   18.82    8.71
  -8   2   6   17.69    8.49
  -8  -2  -6   28.75   11.78
  -8   2  -6   14.85    4.22
   8  -2   6   11.91    3.76
   8   2   6   18.61   15.07
   8   2   6   13.34    5.76
   8  -2  -6   23.26    6.79
  11   5   0    0.37    1.73
  11  -5   0    8.64    6.56
 -11   5   0   -0.10    1.08
  11   5   0    2.84    2.08
 -11   5   0   -0.21    1.75
  11  -5   0   12.96    3.71
  11   5   0    1.79    2.44
  -6   4   6   54.76    9.57
   6   4  -6   44.13   17.79
  -6   4  -6   53.81   12.51
   6   4  -6   43.20    9.25
   6   4   6   45.00    7.07
   6  -4   6   54.17   11.88
  -6  -4  -6   45.18    9.47
  -6  -4  -6   44.87   10.33
  -6   4  -6   48.52   11.14
  -6   4   6   73.73    7.56
  -6  -4   6   53.24   12.96
   6   4   6   45.15    6.99
   6  -4  -6   54.41   11.02
   6  -4  -6   42.63    9.72
   6  -4   6   52.21   11.57
 -12  -2  -3   22.83    6.68
 -12   2  -3   18.54    4.85
 -12   2  -3   15.21    6.41
  12   2  -3   16.24    4.90
 -12  -2   3   16.48    4.34
 -12   2   3   19.01    6.30
  12  -2  -3   17.61    6.36
  12   2  -3   18.92    4.97
  12   2   3   18.41    4.88
  12   2   3   28.72   12.16
  12  -2   3   12.84   10.60
  12  -2   3   21.41    7.20
  12   2  -3   22.65    7.98
  12  -2  -3   23.61    7.31
   6   0  -7    0.22    1.07
  -6   0  -7   16.92    8.85
  -6   0   7    1.86    3.17
   6   0   7   12.41    8.50
  -6   0   7   -0.04    1.58
   6   0   7   22.68    4.96
  -2   8  -3    8.62    4.87
   2   8  -3   27.18    7.37
  -2  -8  -3    5.62    2.73
  -2  -8  -3    8.23    5.22
   2   8  -3   10.67    3.19
  -2   8  -3    2.59    2.19
   2  -8  -3    6.16    2.82
   2  -8   3    8.94    3.55
  -2   8   3    8.11    2.89
   2   8   3    5.61    3.08
   2  -8  -3    7.97    3.58
   2   8   3    4.90    2.34
  -2  -8   3   14.57    5.42
  -2  -8   3    6.07    5.58
  -7   6   4   54.41    9.94
   7  -6   4   33.03    7.50
   7  -6  -4   43.10   12.28
  -7  -6   4   23.85    6.69
  -7  -6  -4   30.38    9.65
   7   6   4   17.78    5.66
   7   6  -4   73.94   21.89
   7  -6  -4   57.95   14.66
   7  -6   4   29.53    7.97
  -7   6  -4   10.34    3.66
  -7   6  -4   18.89    5.47
   7   6  -4   47.10   10.13
  -7  -6  -4   21.40    6.21
   7   6  -4   15.64    3.03
  -7   6   4   46.59   19.83
   7   6   4    0.19    3.71
  -4   5  -6  646.07   24.79
   4  -5  -6  621.51   19.24
  -4  -5   6  612.10   18.65
   4  -5   6  638.61   20.25
   4   5   6  689.20   22.04
   4   5   6  676.93   19.87
  -4  -5  -6  637.22   22.26
   4   5  -6  709.39   21.45
  -4   5  -6  616.09   20.88
   4  -5  -6  618.57   19.69
   4  -5   6  642.87   18.40
 -13   0   2    1.25    0.97
  13   0  -2    1.43    1.54
 -13   0  -2   -0.22    1.89
  13   0   2   -1.16    2.55
  13   0  -2    0.88    1.87
  13   0   2   -0.26    1.81
  13   0  -2    0.05    0.63
   7   5  -5   60.73   19.61
   7  -5   5   43.12    7.10
  -7   5  -5   45.07   10.06
  -7   5  -5   50.30   13.01
  -7  -5  -5   36.72    7.08
   7  -5  -5   64.83    9.32
  -7  -5   5   47.68    9.55
  -7  -5  -5   42.70    7.77
  -7  -5   5   53.65   10.39
   7   5   5   37.58   13.70
  -7   5   5   59.13    9.00
  -7   5   5   73.99   14.74
   7   5   5   49.01    7.38
   7   5  -5   46.89    9.97
   7  -5   5   38.74    8.38
   7  -5  -5   54.34   10.09
  13   2   1    1.05    1.30
  13   2  -1    4.18    2.33
 -13   2  -1   -0.03    0.59
 -13  -2   1    1.21    1.06
  13  -2   1    1.33    1.61
  13   2   1    2.59    4.56
  13  -2   1    1.81    2.33
  13  -2  -1    9.84    8.01
 -13   2   1    1.83    1.39
  13   2  -1   -0.15    2.68
 -13   2  -1    2.14    2.44
 -13  -2  -1    1.83    1.80
 -13   2   1    4.65    2.93
 -13  -2   1    1.03    1.21
  13  -2  -1    7.73    3.50
 -12  -4   0  112.36   10.83
  12   4   0  146.96   13.52
 -12   4   0  116.83   10.79
  12   4   0  103.41   15.51
  12  -4   0  114.95    6.11
  12  -4   0  112.50    7.46
 -12   4   0  113.14    6.43
  12   4   0  102.52   11.64
   4  -3   7    2.98    2.53
  -4   3  -7    3.24    3.60
   4   3  -7    1.37    2.72
  -4   3  -7    3.89    3.81
   4   3  -7    8.81    4.42
  -4  -3  -7    3.69    2.45
   4  -3  -7    2.48    1.72
  -4  -3   7    1.85    1.22
   4  -3   7   11.08    5.46
  -4  -3  -7    1.97    2.75
  -4   3   7    1.81    1.18
   4   3   7   -0.08    2.35
   4  -3  -7    4.90    3.39
   4   3   7   -0.90    1.76
  -4   3   7    0.91    1.57
   8  -7  -1    7.06    3.18
  -8  -7   1   13.45    3.79
  -8  -7  -1   11.65    4.37
  -8   7  -1   12.47    5.45
   8  -7  -1   10.02    5.39
   8   7  -1   12.40    8.45
  -8   7   1    6.60    2.94
   8   7   1   14.14    4.66
  -8   7   1    7.38    5.60
   8   7  -1   10.27    4.30
   8  -7   1   14.40    5.50
   8  -7   1   12.25    6.57
   0  -4   7    4.57    2.38
   0   4  -7    3.41    2.42
   0   4  -7    1.63    2.05
   0  -4  -7    2.57    2.72
   0  -4  -7   -0.67    2.12
   0   4   7    4.54    2.93
   0   4   7    3.04    1.46
 -11  -5   1  124.64   10.30
 -11   5  -1  130.38   11.43
 -11   5   1  128.31   11.87
  11   5  -1  125.21   17.03
  11  -5   1  108.27   11.64
  11  -5  -1  114.38    7.22
 -11   5  -1  127.06   12.08
  11   5   1  112.22   12.30
  11   5  -1  119.38   11.56
  11   5   1  162.47   14.93
 -11  -5  -1  123.12   10.24
  11  -5  -1  124.10   10.92
 -11   5   1  118.78   10.79
  11  -5   1  127.01   12.26
  11   5   1  140.93   16.40
  11   5  -1  131.93   12.44
   6   1   7    8.49    4.42
  -6   1  -7   15.72    4.60
  -6  -1  -7   13.12    6.02
  -6   1  -7   11.46    4.83
   6  -1   7   12.66    4.56
   6  -1  -7   11.17    5.34
   6  -1  -7    8.50    4.62
   6   1  -7    9.77    3.80
  -6  -1   7    7.57    6.50
   6  -1   7    8.98    4.11
  -6  -1  -7   11.65    3.43
  -6   1   7   18.59    8.54
  -6  -1   7   11.78    5.45
   6   1   7   14.32    5.74
  -6   1   7   11.36    4.86
   6   1  -7   15.82    8.63
  -1  -4  -7   12.26    4.58
   1   4   7    6.07    3.71
  -1   4  -7    2.06    3.47
   1   4   7   11.48    4.19
  -1   4   7    8.67    4.29
   1  -4  -7    5.92    2.89
  -1  -4   7    8.19    4.52
   1   4  -7    2.40    2.92
  -1   4  -7    8.49    9.47
  -1   4   7    8.79    3.32
   1   4  -7    6.38    3.10
   1  -4   7    3.89    3.24
   1  -4  -7    7.06    3.12
  -1  -4  -7    7.81    3.77
   5  -6  -5  718.93   21.40
   5  -6  -5  647.05   22.67
   5   6  -5  680.85   19.98
  -5  -6  -5  661.23   20.73
  -5   6  -5  653.05   22.07
   5   6   5  744.13   23.25
   5   6   5  669.88   20.37
   5   6  -5  714.63   24.01
   5  -6   5  647.53   19.45
  -5  -6  -5  616.19   19.37
  -5  -6   5  600.72   18.80
  -5   6   5  767.54   22.74
  -5   6   5  689.97   19.42
  -5   6  -5  617.16   20.19
  10  -2  -5    5.93    2.45
 -10  -2  -5    6.16    3.46
 -10   2  -5   -0.60    2.46
 -10  -2   5    2.65    1.18
  10   2   5    3.25    1.97
 -10   2   5    3.43    2.53
  10  -2  -5    0.49    2.73
  10   2  -5    1.75    1.20
  10   2   5    9.26    5.81
  10   2  -5    6.56    3.52
  10  -2   5    8.18    4.25
  10  -2   5    1.43    1.43
 -10   2  -5    2.32    1.41
  13  -1  -2   13.57    4.96
  13   1  -2   11.96    5.02
 -13  -1  -2    7.62    4.27
  13  -1  -2   11.12    3.79
 -13   1  -2    5.96    3.54
  13   1   2    8.23    3.51
  13  -1   2   16.35    4.26
  13   1   2    8.80    5.77
  13  -1  -2    2.34    1.35
  13   1  -2    1.53    1.12
  13  -1   2    6.61    6.79
 -13  -1   2   12.15    3.76
 -13   1   2    2.34    1.35
  13   1  -2    9.86    3.16
 -10  -6   0  772.22   23.17
  10   6   0  736.75   22.10
 -10   6   0  723.82   21.26
  10   6   0  634.88   18.67
 -10   6   0  697.88   20.29
 -10  -6   0  660.16   18.05
  10  -6   0  705.05   21.25
  10  -6   0  652.41   20.32
  12   4  -1    0.20    0.60
 -12   4  -1    1.38    1.65
 -12  -4   1    1.06    0.90
  12   4   1   -0.19    2.73
  12  -4  -1    0.68    2.77
  12  -4   1    1.01    1.46
 -12   4   1    0.08    2.34
 -12   4   1   -0.77    1.33
  12   4  -1    1.11    1.96
  12   4   1    6.19    4.34
  12  -4   1    0.59    2.04
  12   4  -1    0.01    1.90
  12   4   1    1.39    0.74
  12  -4  -1    2.50    2.06
 -12   4  -1   -0.37    1.06
  10   4  -4  321.73   19.70
  10  -4   4  307.10   18.89
  10  -4  -4  330.47   20.28
  10   4  -4  284.41   18.82
 -10   4  -4  277.84   17.02
 -10   4   4  343.47   20.47
  10   4  -4  284.00   18.24
  10  -4   4  263.48   17.05
  10   4  -4  307.08   20.64
  10  -4  -4  301.45   19.82
  10   4   4  409.77   26.09
 -10  -4  -4  276.46   17.63
  11  -4  -3    3.49    3.36
  11   4   3    5.34    4.62
  11   4  -3    2.35    0.93
  11  -4  -3    1.31    1.65
 -11   4  -3    2.54    1.48
  11   4  -3   -0.10    2.28
  11  -4   3    3.33    3.24
  11   4   3    1.23    1.65
 -11  -4  -3    2.00    1.74
  11   4  -3    1.60    1.42
  11   4   3    0.66    0.57
 -11   4   3    0.90    1.50
  11  -4   3    4.90    2.26
  11   4  -3    0.39    1.22
  10   5  -3   51.36    8.63
  10   5   3   50.53    7.99
 -10   5  -3   58.37   11.42
  10   5  -3   59.09   10.96
  10  -5  -3   50.12    9.06
  10  -5  -3   47.99    9.66
 -10   5  -3   58.47   11.70
  10   5  -3   55.17    8.70
 -10   5   3   68.38   11.15
  10  -5   3   40.42    6.90
  10  -5   3   48.09    8.19
  10   5  -3   52.66    8.38
 -10  -5  -3   58.95    9.71
 -10  -5  -3   53.51   10.08
   3  -8   3  362.83   21.30
  -3  -8  -3  354.25   20.15
   3   8   3  391.69   23.12
  -3   8   3  391.11   24.95
   3  -8  -3  407.87   27.92
  -3   8  -3  348.97   21.57
  -3   8  -3  325.52   19.57
   3   8  -3  396.49   25.38
   3   8  -3  316.23   18.81
   3  -8   3  358.41   21.13
  -3   8   3  415.59   24.32
  -3  -8  -3  399.34   23.89
   3  -8  -3  385.45   24.41
  -3  -8   3  351.73   20.45
   3   8   3  377.66   22.14
  -6  -8   0  232.60   10.28
  -6   8   0  237.05   14.88
   6   8   0  210.56   17.57
  -6   8   0  220.19   17.48
   6   8   0  245.11   20.76
   6  -8   0  234.08   15.07
   6  -8   0  216.87   17.66
   2  -4  -7    7.87    3.19
  -2   4   7   10.49    4.90
   2   4   7    7.90    3.40
  -2   4   7    7.76    2.92
  -2   4  -7   11.19    4.42
   2   4   7   10.29    3.44
  -2   4  -7   13.43    5.51
  -2  -4  -7    7.64    3.94
   2   4  -7    7.99    3.90
  -2  -4   7    0.72    1.27
   2  -4  -7    5.42    2.96
  -2  -4  -7   12.31    4.30
   2  -4   7   12.14   11.12
   2  -4   7    7.31    2.17
   2   4  -7    6.66    2.84
   9  -5  -4    2.40    1.91
   9   5  -4    1.25    2.65
  -9  -5  -4    2.44    2.48
   9  -5  -4    8.53    6.99
   9  -5   4    1.12    1.26
   9   5  -4    2.59    2.66
   9   5   4   -1.17    2.82
   9   5  -4    7.79    2.70
  -9   5   4    9.45    6.03
  -9   5  -4   -0.36    2.01
  -9  -5  -4    1.20    3.09
   9  -5   4   -0.11    2.95
  -9   5  -4    6.06    3.97
   9   5   4    1.30    1.45
   5   8   2    3.74    3.69
  -5   8  -2    6.96    4.07
  -5   8   2   14.78    7.66
   5   8  -2   15.04   10.50
   5   8   2   10.97    5.11
   5  -8  -2    8.39    4.71
   5   8  -2    8.03    2.78
  -5   8   2   12.97    2.86
  -5   8  -2    9.28    2.95
   5  -8  -2   14.44    3.85
   5  -8   2   11.97    6.38
  -5  -8  -2    9.50    6.14
  -5  -8   2    5.26    3.29
   5  -8   2   12.93    6.64
  -5  -7  -4    0.91    1.75
  -5  -7   4    1.47    1.76
   5  -7   4   -0.06    2.68
   5   7  -4    5.18    3.75
   5   7  -4    1.19    1.79
  -5  -7  -4    0.19    0.91
  -5   7  -4    1.63    1.66
   5   7   4    0.44    1.68
   5   7   4    1.35    1.02
  -5   7   4    2.43    2.14
  -5   7   4    1.42    1.67
   5  -7  -4    0.71    1.31
   5  -7   4    0.25    1.46
  -5   7  -4    1.78    2.74
  -5  -7   4    5.65    2.19
   9   0   6   -0.90    3.33
  -9   0  -6   -0.27    1.48
  -9   0  -6    2.01    2.81
   9   0  -6    0.82    1.96
   9   0   6   -1.38    2.92
  -9   0   6   -0.01    0.85
   9   0  -6    1.02    2.00
  -9   0   6    2.05    1.83
 -10   6  -1    1.72    1.93
  10  -6   1   14.69    7.06
 -10   6  -1    0.47    1.38
  10  -6  -1   -0.12    2.56
 -10  -6   1    1.50    0.57
  10  -6   1   12.99    6.84
  10  -6  -1   -0.18    1.52
 -10   6   1   -0.96    1.98
  10   6   1    1.06    1.14
  10   6  -1    2.37    1.83
 -10  -6  -1    3.00    2.57
 -10   6   1    1.74    2.61
  10   6  -1    0.81    1.38
  10   6   1    3.17    2.30
   0   7   5    4.61    4.73
   0  -7   5    5.17    2.78
   0   7  -5    8.99    4.31
   0  -7  -5    5.11    3.54
   0   7  -5    8.10    3.63
   0   7   5    9.79    2.80
   0  -7  -5    7.94    4.05
   0  -7   5    1.96    1.40
   0   0  -8  618.71   17.58
   0   0   8  664.04   21.20
   0   0   8  597.50   22.77
   0   0  -8  651.37   21.12
   6   8   1   -0.86    1.89
   6   8  -1   -0.56    2.09
  -6   8   1    1.23    1.16
   6  -8   1    4.39    4.59
   6   8  -1    1.47    2.00
  -6   8  -1    3.49    3.35
   6   8   1   -0.68    1.73
  -6  -8   1    1.39    0.83
   6  -8  -1    2.63    2.40
  -6   8  -1   -0.54    1.13
  -6   8   1    0.28    2.63
  -6  -8  -1    0.11    2.25
   6  -8  -1    0.26    1.08
   6  -8   1    1.65    1.67
  11  -3   4    5.23    4.23
  11  -3  -4    9.91    5.75
  11   3   4    0.56    1.86
 -11  -3  -4    2.85    2.26
  11   3  -4    1.54    1.47
  11   3   4    2.57    1.94
  11   3  -4    2.16    1.38
 -11   3   4    0.54    2.18
 -11   3  -4    0.98    1.61
 -11   3  -4    1.00    1.02
  11   3  -4    1.51    2.19
  11   3  -4    3.18    2.96
  11  -3  -4    0.09    1.80
  11  -3   4   -0.73    3.51
  -9  -1   6    1.56    1.42
  -9  -1   6    6.95    4.95
  -9   1  -6   -0.70    2.04
   9   1   6    1.43    1.77
   9  -1   6    1.84    2.01
   9   1  -6    4.83    1.80
   9   1   6    1.95    3.87
  -9   1   6    2.35    1.90
  -9  -1  -6    0.20    1.54
   9   1   6    3.27    2.14
  -9   1  -6    5.06    3.06
   9   1  -6    4.77    3.76
   9  -1  -6    4.62    1.98
   9  -1   6    7.45    4.16
   1   7   5  896.38   25.86
  -1  -7   5  837.54   22.63
   1  -7   5  932.03   25.36
  -1  -7   5  839.86   24.26
   1   7   5  910.00   25.74
  -1  -7  -5  934.90   28.69
   1  -7   5  906.75   26.91
   1  -7  -5  916.51   27.06
   1   7  -5  881.95   26.17
  -1   7  -5  803.32   27.01
  -1  -7  -5  932.87   26.33
  -1   7   5  955.19   26.95
   1   0  -8    1.23    1.60
   1   0   8    4.88    6.34
   1   0  -8    0.60    0.83
   1   0   8   -0.60    3.73
  -1   0  -8    2.69    4.53
  -1   0  -8    0.60    0.75
  -1   0   8    3.46    3.90
  -1   0   8    0.43    2.62
  -5   5   6   27.87    4.98
   5  -5  -6   23.57    6.11
   5   5   6   26.88    8.49
   5   5   6   17.04    3.39
  -5   5   6   22.67    8.10
  -5   5  -6   28.04   12.91
   5   5  -6   27.14   12.84
  -5  -5   6   20.06    7.31
  -5  -5  -6   23.38    6.28
   5  -5   6   20.01    3.66
   5  -5  -6   26.96    7.57
  -5  -5  -6   28.20   10.88
   5   5  -6   19.85    5.10
  -5   5  -6   24.78    7.42
   5  -5   6   11.12    3.51
   0   9   0    3.46    3.51
   0   9   0    0.50    1.79
   0  -9   0    1.07    1.90
  -6   2  -7    5.54    2.65
   6   2  -7   15.28    5.37
  -6  -2  -7   10.87    4.68
  -6  -2  -7   10.18    4.43
   6  -2  -7    7.34    4.33
   6   2  -7    6.49    2.29
   6  -2   7    9.48    3.63
  -6  -2   7    1.11    1.59
   6  -2   7    5.72    4.36
   6   2   7    8.85    5.38
  -6   2   7    7.69    2.64
   6   2   7    7.05    4.13
  -6   2  -7    5.78    4.29
   6   2  -7   10.89    4.08
   6  -2  -7    9.13    8.40
  -6   2   7    8.12    4.64
  13   3   0    1.42    2.58
 -13   3   0   -0.37    0.99
  13   3   0   -0.25    0.86
  13  -3   0    0.03    1.62
 -13   3   0    0.89    1.22
  13   3   0    3.17    4.32
 -13  -3   0   -0.21    1.16
  13  -3   0    0.97    1.14
 -13   2  -2    5.75    2.15
 -13  -2   2    9.87    2.73
  13   2  -2    6.84    5.87
  13  -2   2    5.93    3.22
  13   2   2    3.80    4.24
  13  -2   2    3.71    6.08
  13   2  -2    9.81    2.64
 -13   2   2    6.82    2.77
  13   2  -2    9.02    4.38
 -13  -2  -2    6.30    3.04
  13  -2  -2    7.34    4.00
 -13   2  -2    3.90    1.93
  13   2   2    7.01    2.91
   7  -7   3   78.27   15.91
   7  -7   3   81.21   10.10
  -7  -7  -3   70.59    7.92
  -7   7  -3   87.99   13.68
   7   7  -3   74.95   11.46
   7  -7  -3   71.52    9.90
   7  -7  -3   67.32   10.56
   7   7  -3   62.95    9.12
  -7   7   3   68.65    7.83
   7   7   3   73.99    7.87
   7   7  -3   69.40    7.91
   7   7   3   67.35    7.16
  -7  -7  -3   57.16    8.36
  -7   7   3   82.02   12.08
  -7   7  -3   77.77   12.01
  -7  -7   3   61.34    7.89
   0  -6  -6 1419.76   40.00
   0  -6  -6 1399.50   38.42
   0  -6   6 1385.81   39.39
   0   6   6 1489.15   41.03
   0   6  -6 1297.82   38.25
   0   6  -6 1322.04   36.83
  -5   3   7    3.28    1.72
  -5  -3  -7    5.36    3.10
   5  -3  -7    5.11    3.32
  -5   3  -7    3.52    2.47
   5  -3  -7    2.80    2.63
  -5   3  -7   -0.62    2.52
  -5  -3   7    2.74    2.33
  -5  -3  -7    4.09    2.30
   5  -3   7    1.88    1.79
  -5   3   7    7.31    3.64
   5  -3   7   -0.07    3.33
   5   3   7    3.96    3.10
   5   3  -7    2.72    3.91
   5   3   7    4.02    2.48
   8  -7  -2  858.80   23.74
   8  -7   2  912.17   26.65
   8   7  -2  912.74   28.67
   1   9   0   74.91    9.95
  -1   9   0   28.06    4.70
  -1   9   0   59.20   16.24
  -1  -9   0   44.32   14.72
   1   9   0   63.10   12.78
   1  -9   0   43.43   14.90
   3  -4   7   58.79    9.00
  -3  -4   7   59.23    9.34
  -3  -4  -7   57.68    8.92
   3  -4   7   51.11    8.42
   3  -4  -7   58.85   12.52
  -3  -4  -7   65.05   10.18
   3   4  -7   59.78   10.43
   3  -4  -7   53.94    8.92
  -3   4  -7   62.20    8.38
   3   4  -7   47.66    9.60
  -3   4  -7   48.57   11.36
   3   4   7   64.19    8.25
   3   4   7   63.44    7.73
  -3   4   7   61.63    9.59
   0   1  -8    2.36    2.84
   0  -1  -8    1.19    2.66
   0   1   8    1.52    4.01
   0  -1  -8   -0.12    1.18
   0   1  -8    8.50    3.85
   0   1  -8    7.02    2.78
   0  -1   8   10.06    5.23
   0   1   8    1.39    1.84
 -12   0  -4  539.65   19.32
 -12   0   4  563.21   17.45
  12   0  -4  543.79   20.22
  12   0  -4  531.77   17.51
  12   0   4  614.44   20.58
   8   3  -6   78.83   11.11
   8  -3   6   69.38   15.50
  -8  -3  -6   72.72   10.34
   8   3   6   99.01   11.39
  -8  -3  -6   75.18   11.97
   8   3  -6   63.77   11.43
  -8  -3   6   62.79    8.60
   8  -3  -6   68.79    8.61
  -8   3  -6   58.52   13.07
   8   3  -6   63.80    7.88
  -8   3   6   80.72   13.65
   8  -3  -6   78.10   12.25
  11  -5   2    5.02    3.66
  11  -5  -2    1.53    1.18
  11   5  -2    0.31    0.91
  11   5   2    3.18    5.14
  11   5  -2    0.58    2.06
  11   5   2    0.81    1.09
 -11   5  -2    1.15    1.66
 -11   5   2    0.34    1.57
 -11   5  -2    1.96    2.12
  11  -5   2   -0.31    2.59
  11   5   2    2.10    2.55
  11   5  -2   -0.21    2.79
  11   5  -2    2.20    2.64
 -11  -5  -2    1.65    1.18
   1   6  -6    2.51    2.06
  -1  -6   6    2.14    2.66
  -1   6   6    3.50    2.99
   1  -6  -6    6.01    4.33
   1  -6   6    2.69    5.69
   1   6  -6    2.27    2.43
   1  -6  -6    1.10    2.82
  -1   6   6    7.17    3.18
   1  -6   6    3.92    1.09
  -1  -6  -6    5.70    3.36
   1   6   6    2.22    2.05
  -1  -6  -6    2.98    1.50
   1   6   6    6.71    4.01
  -1   6  -6    4.60    2.49
  -1   6  -6    3.15    1.91
  12  -3   3   11.33    5.83
  12   3   3    9.87    4.44
 -12   3  -3   12.06    4.28
 -12   3   3   14.44    5.40
  12   3  -3   11.58    2.50
 -12  -3  -3   15.03    4.18
  12  -3  -3   15.70    7.96
  12   3   3    9.82    3.26
 -12   3  -3   11.56    2.87
  12   3  -3   14.62    5.90
  12  -3   3   14.91    6.47
  12   3  -3   12.87    4.05
  12   3  -3   20.00    6.09
  12  -3  -3    9.94    3.77
  -9   6  -3  169.67   14.24
   9  -6   3  200.05   17.43
   9   6   3  166.39   13.43
   9   6  -3  153.26   16.26
   9  -6  -3  160.56   16.43
  -9   6  -3  158.14   13.49
   9   6  -3  171.65   14.41
   9   6  -3  183.81   15.08
  -9   6   3  196.16   18.58
  -9  -6  -3  176.17   16.43
  -9  -6  -3  157.47   13.28
  -9  -6   3  170.82   15.49
   9  -6   3  156.75   13.53
   9  -6  -3  164.10   13.19
  -1   1   8   12.24    4.73
  -1   1   8   18.51    5.84
   1   1   8   13.74    5.23
   1  -1  -8   13.38    4.50
  -1   1  -8    8.48    3.58
   1   1  -8   12.39    5.28
  -1  -1  -8   13.42    4.97
  -1  -1  -8    8.93    2.99
  -1   1  -8    9.80    9.71
   1  -1  -8    9.42    2.84
  -1   1  -8    7.24    2.65
   1   1  -8    8.83    3.32
  -1  -1   8   12.18    4.36
   1  -1   8    7.53    3.98
   1   1   8    9.26    3.82
  -9   4   5   87.65   14.48
   9   4  -5   60.32    5.27
  -9  -4  -5   67.82   12.07
   9   4  -5   71.21   11.46
   9  -4   5   67.12    8.18
   9  -4  -5   84.38   10.64
  -9  -4   5   68.30    7.95
   9  -4   5   64.35    9.53
   9   4   5   81.07   14.95
  -9   4  -5   65.22   11.32
   9   4  -5   78.26   20.51
   9  -4  -5   87.91   11.85
  -9   4  -5   71.07   12.17
  -9  -4  -5   64.11   12.50
   4  -8  -3   16.44    5.32
   4   8   3   13.73    4.71
   4  -8   3   13.08    5.88
  -4   8   3   12.67    2.81
  -4  -8  -3   15.02    5.74
  -4   8  -3   10.11    5.48
  -4   8  -3   14.79    5.66
   4   8  -3   13.17    3.80
  -4   8   3   12.19    3.22
   4  -8   3   15.24    5.45
   4   8   3   13.61    4.71
   4   8  -3   12.05    9.32
   4   8  -3    8.16    3.47
  -4  -8  -3   10.05    3.54
   4  -8  -3   15.19    5.73
  -4  -8   3    8.28    3.40
  -2  -7   5    4.52    1.96
  -2  -7   5    5.34    3.95
   2  -7   5    5.09    3.61
  -2  -7  -5    7.21    3.45
   2   7  -5    7.18    4.06
  -2   7  -5    4.24    1.97
   2   7  -5    4.10    1.99
  -2   7  -5    2.26    2.64
  -2   7   5    8.15    4.84
   2   7   5    7.49    3.17
   2   7   5    4.57    2.42
   2  -7  -5    4.95    1.79
  -2  -7  -5    5.05    4.24
   2  -7  -5    2.63    5.91
   2  -7   5    4.92    1.94
  -2   7   5    5.49    3.20
  -7   4  -6   46.40   11.21
  -7   4   6   64.23    8.06
  -7  -4  -6   40.93    9.85
   7   4   6   39.52    8.74
   7   4  -6   41.71    7.22
   7   4  -6   46.19   17.31
   7  -4   6   69.72    9.23
  -7  -4  -6   39.68    7.59
  -7   4   6   53.70   16.97
   7  -4  -6   48.06    9.55
   7   4  -6   41.48    8.43
  -7  -4   6   39.52    7.78
   7   4   6   41.45    6.41
  -7   4  -6   38.69   10.15
   7  -4  -6   35.87   10.80
  -2   0  -8   16.41    5.05
   2   0  -8   16.31    3.34
   2   0  -8   22.14    7.34
  -2   0   8   22.10    8.62
   2   0   8   22.09    9.08
  -2   0  -8   26.43    7.42
   0  -9   1   11.64    3.63
   0   9   1   11.47    3.42
   0   9  -1   18.36    4.73
   0  -9  -1    8.52    4.84
   0   9  -1    1.04    0.71
   0   9   1   10.81    7.08
 -13   3  -1   46.27    7.56
  13   3   1   55.04    9.58
 -13  -3   1   53.29    8.07
  13  -3  -1   59.09    8.78
  13   3  -1   62.92    8.73
  13  -3   1   50.38   11.13
  13  -3   1   38.91   10.51
 -13   3   1   52.68    8.18
  13   3  -1   52.71   14.02
  13   3  -1   49.48    7.90
 -13   3  -1   54.76   12.56
 -13   3   1   57.25    9.67
 -13  -3  -1   45.65    7.68
  12  -4   2  103.04   14.14
  12  -4  -2   87.25   13.09
 -12  -4  -2   85.63    9.11
 -12   4   2  107.93   12.56
  12  -4   2   84.06    9.96
  12  -4  -2   89.62    9.53
  12   4  -2   97.10   10.62
 -12   4  -2   89.55   10.46
  12   4  -2   94.86   11.59
  12   4  -2   82.96   12.32
  12   4  -2   84.31   11.53
 -12   4  -2   85.02    9.69
  -7   0   7   18.70    7.37
   7   0   7   13.35    6.77
   7   0   7   17.22    6.22
   7   0  -7   17.51    8.04
  -7   0  -7   22.22    9.86
   7   0  -7   13.47    4.79
  -7   0   7   15.96    5.02
  12  -1  -4   66.34    8.16
 -12   1  -4   57.33    9.54
  12   1  -4   61.35    7.30
 -12   1  -4   66.74   10.43
  12   1   4   79.34   12.22
 -12  -1  -4   64.45   11.34
  12  -1   4   51.99   11.20
  12   1   4   58.52   13.81
  12  -1   4   73.22   11.35
  12  -1  -4   67.35    9.05
  12   1  -4   60.18   11.09
  12   1  -4   74.95   13.60
 -12  -1   4   74.69    8.78
 -12   1   4   69.73   11.30
   1  -9  -1  480.23   32.08
  -1  -9   1  432.44   27.30
   1   9  -1  500.37   11.14
   1   9  -1  533.98   17.73
   1  -9   1  498.82   15.11
   1   9   1  448.42   29.16
   1   9   1  515.46   16.63
  -1   9   1  474.27   28.93
  -1   9  -1  522.34   17.39
  -1  -9  -1  448.47   27.96
   2  -9   0  325.27   19.68
  -2   9   0  305.16   18.54
  -2   9   0  292.60   18.69
   2   9   0  257.96   19.07
  -2  -9   0  295.64   18.47
  -2   9   0  269.83   15.99
   2   9   0  305.38   19.54
   6  -6   5   13.09    4.33
  -6  -6  -5   12.78    6.57
  -6   6   5   31.36   11.40
  -6   6  -5    3.10    2.17
   6   6  -5   32.87   11.68
  -6   6  -5   12.12    4.62
  -6  -6  -5   12.92    3.86
   6  -6  -5   35.70   10.71
   6   6  -5   17.10    5.54
   6   6   5   10.40    3.05
   6  -6  -5   22.22    7.74
  -6  -6   5   21.10    7.31
   6  -6   5    6.44    3.76
   6   6   5   -4.09    3.38
  -6   6   5   19.66    4.56
  -6  -6   5   13.82    3.55
   2  -6  -6   15.98    5.90
   2  -6   6   13.50    3.65
   2  -6  -6   15.35    7.14
  -2   6  -6   15.85    6.78
  -2   6   6   23.92    5.37
  -2  -6  -6   14.88    6.39
  -2   6   6   19.55    8.20
   2   6  -6    1.20    8.31
   2   6   6   19.09    8.08
  -2   6  -6   16.28    7.41
   2   6  -6   17.10    5.60
  -2  -6  -6   11.87    5.57
   2   6   6   16.00    3.75
   2  -6   6    1.34    1.39
  -2  -6   6   15.27    9.41
 -11   0  -5  672.29   19.24
  11   0  -5  723.19   22.27
  11   0  -5  695.43   20.45
 -11   0  -5  647.12   21.29
 -11   0   5  679.72   21.03
  11   0   5  642.27   21.76
 -10   3  -5   20.91    6.22
  10   3  -5   22.57    4.39
  10   3  -5   15.15    3.53
  10  -3  -5   21.53    7.81
 -10  -3   5   19.55    4.35
  10   3   5   20.05    7.31
  10  -3   5   20.88    8.48
  10  -3   5   23.22   10.76
 -10   3   5   26.24    8.70
 -10   3  -5   21.22    6.49
  10  -3  -5   22.75   10.13
 -10  -3  -5   27.84    7.95
  10   3  -5   15.07    5.47
  -2   1  -8  138.93   25.48
  -2   1   8  101.75   11.45
  -2  -1  -8  105.25   11.69
  -2   1   8  107.68   11.33
   2   1   8  108.00   14.04
   2   1  -8   98.21    9.86
   2  -1  -8  106.18   12.07
  -2  -1   8  108.99   15.46
   2   1  -8  128.11   17.31
   2   1   8  111.88   12.15
  -2  -1  -8  128.72   13.62
   2  -1  -8  107.06   13.10
   2  -1   8  112.13   15.65
  -2   1  -8  105.24   10.69
  -2   1  -8  118.21   12.43
  13   0   3    9.24    4.12
  13   0  -3    0.74    0.75
 -13   0   3   -0.01    1.99
 -13   0  -3    3.52    2.26
  13   0  -3    2.85    2.39
  13   0  -3    9.15    5.62
  13   0   3    5.04    5.24
  -8  -6   4 1099.60   30.13
  -8   6  -4  953.43   29.18
  -8   6   4 1033.13   29.33
   8   6  -4 1173.43   33.34
   8   6   4 1075.72   29.30
   8   6  -4 1074.35   29.25
   8   6  -4 1191.12   35.63
   8  -6   4 1006.34   28.18
   8  -6  -4 1102.85   31.77
  -8  -6  -4 1058.05   30.48
   8  -6  -4 1219.31   35.11
   8  -6   4 1076.67   32.15
  -9  -7   0    0.22    0.25
   9  -7   0    3.15    3.14
  -9  -7   0    0.24    1.38
  -9   7   0   -0.50    1.57
  -9   7   0   -0.02    1.69
   9   7   0    1.19    0.97
   9   7   0    0.61    0.93
   9  -7   0   -0.36    1.30
  -7   1  -7    8.36    4.03
   7   1  -7    7.33    3.10
   7   1  -7   10.08    5.21
  -7   1   7   12.55    4.56
   7  -1  -7   10.22    4.06
  -7  -1   7    1.75    1.27
  -7  -1   7   13.39    4.79
  -7   1   7   13.81    7.74
  -7   1  -7    7.39    3.76
  -7  -1  -7    3.65    4.96
   7  -1  -7    8.99    5.06
   7   1   7    4.82    4.42
   7   1   7    9.19    6.05
   7  -1   7    8.94    3.97
   7  -1   7    4.69    3.94
 -14   0   0  322.50   19.60
 -14   0   0  312.54   18.00
  14   0   0  357.19   20.81
  14   0   0  308.08   20.15
  10   6   2   72.29    9.16
 -10  -6  -2   71.93    7.51
 -10   6  -2   66.55   10.51
  10   6  -2   72.85   11.62
 -10   6  -2   71.61    9.53
  10   6  -2   75.44   12.44
  10  -6   2   69.94   12.78
  10   6   2   63.08    9.52
 -10   6   2   72.72   12.71
  10  -6   2   67.36    8.48
  10  -6  -2   70.50    9.67
  10   6  -2   87.05    9.73
 -10  -6  -2   58.02    9.74
  10  -6  -2   66.14    8.43
  -8  -5   5    1.69    1.46
   8   5  -5    1.90    1.63
   8  -5  -5    7.33    3.79
  -8  -5  -5    1.67    2.79
   8   5  -5    2.15    3.54
   8  -5  -5    2.88    2.62
   8   5   5    1.84    1.90
  -8   5   5    4.10    3.13
   8  -5   5    5.63    3.10
  -8   5   5    0.37    0.39
   8   5   5    0.76    1.02
  -8   5  -5    0.48    1.49
  -8   5  -5   -0.01    2.80
  -8  -5  -5    0.77    1.85
   8   5  -5    1.65    1.25
   8  -5   5   13.56    5.35
   9  -2  -6   75.88    8.72
  -9  -2  -6   64.99   13.15
   9   2   6   76.35   13.16
   9   2  -6   72.15   11.32
  -9   2  -6   67.11   10.56
   9   2  -6   97.94   14.71
  -9   2  -6   86.50   16.10
   9   2  -6   70.13   10.62
   9  -2  -6   76.91   10.72
   9  -2   6   76.62   16.09
   9   2   6   56.64   10.78
   9   2   6   66.88   10.88
  -9   2   6   88.88   15.59
   2   9   1    4.70    3.26
   2   9  -1   14.87    6.04
  -2   9  -1    8.46    4.55
   2   9   1    4.56    2.37
  -2   9  -1    1.83    1.28
   2  -9   1    7.44    6.14
  -2  -9  -1    3.94    3.28
  -2  -9   1    4.66    3.21
   2  -9   1    8.22    5.34
   2   9  -1   11.25    6.11
  -2   9   1   10.01    3.33
   2  -9  -1    5.68    3.42
  -2   9   1   14.83    6.33
  11  -1  -5  232.18   11.71
 -11  -1   5  259.54   17.89
 -11   1   5  248.54   16.64
 -11   1  -5  227.57   20.28
 -11  -1  -5  257.52   20.86
  11  -1  -5  237.13   18.14
  11   1  -5  245.64   18.72
  11   1   5  261.58   15.29
  11   1   5  259.94   25.61
  11   1  -5  210.64   18.07
  11  -1   5  276.22   18.54
 -11   1  -5  289.59   18.65
   0  -8  -4   42.09    8.42
   0   8   4   38.22    5.99
   0  -8   4   38.05    6.06
   0  -8   4   36.99    7.25
   0   8  -4   46.51   14.68
   0  -8  -4   59.66   13.37
   0   8  -4   48.85   10.09
   0   8   4   48.24   12.18
  -3  -7   5  362.95   21.99
   3  -7  -5  380.55   23.84
   3  -7  -5  339.35   21.04
   3   7   5  364.66   24.88
  -3   7  -5  289.76   19.48
   3  -7   5  377.48   22.07
  -3  -7   5  305.51   17.58
  -3   7  -5  297.96   19.81
   3   7  -5  379.66   22.34
   3  -7   5  351.22   21.45
  -3   7   5  346.56   21.49
  -3  -7  -5  389.85   22.82
   3   0  -8    1.27    2.55
  -3   0   8   -2.00    2.85
  -3   0  -8    0.39    0.84
  -3   0  -8    4.25    3.70
  -3   0   8   -0.20    2.50
   3   0   8   -2.14    6.86
   3   0  -8    1.24    1.12
   6  -8   2   85.51    9.72
  -6   8   2   93.03   10.82
   6   8   2   71.86    7.51
  -6  -8   2   85.37    9.55
  -6   8  -2   75.67    9.00
  -6  -8  -2   80.34   12.26
  -6   8  -2   80.30    9.02
   6  -8  -2   81.94    9.43
   6   8  -2   89.86   18.54
   6  -8   2   84.81    9.68
   6   8   2   89.35    9.35
   6   8  -2   76.48    9.97
  13   1  -3  127.05   16.29
 -13  -1  -3  133.22   13.13
  13  -1  -3  133.15   14.39
  13   1  -3  124.39   15.64
  13  -1   3  182.73   19.30
  13  -1   3  203.43   18.16
 -13   1  -3  126.91   12.57
 -13   1   3  151.91   13.99
  13  -1  -3  131.11   18.76
 -13  -1   3  162.80   16.73
  13   1   3  219.79   27.02
  13   1  -3  138.85   11.74
   4  -4   7    3.51    1.62
  -4   4  -7    1.36    2.10
  -4  -4  -7    1.86    2.71
   4   4  -7    4.55    3.32
  -4   4   7    2.23    2.95
  -4  -4  -7    1.30    1.55
  -4   4  -7    0.05    2.46
   4   4   7    5.06    4.37
  -4  -4   7    2.33    1.87
   4  -4   7    0.26    1.89
   4   4   7    0.96    1.44
   4   4  -7    1.60    1.39
  -4   4   7    1.26    1.35
   4  -4  -7    1.24    1.59
   4  -4  -7    1.19    3.29
  -6   7  -4   24.40    7.17
  -6   7   4   56.42   12.60
  -6  -7  -4   21.63    6.19
  -6   7   4   43.97    9.96
   6   7  -4   19.65    4.93
   6  -7  -4   44.70   11.96
   6  -7   4   22.13    8.17
   6   7   4   48.04   15.53
  -6  -7  -4   18.66    8.06
   6  -7   4   20.86    4.62
  -6   7  -4   22.10    6.89
   6  -7  -4   28.51    5.91
   6   7   4   15.65    5.15
  -6  -7   4   21.64    4.56
   6   7  -4   56.55   18.67
   0  -2   8   50.55   10.30
   0   2   8   60.18    6.92
   0   2   8   53.72    8.84
   0  -2  -8   47.34    9.64
   0   2  -8   55.56    9.98
   0  -2  -8   49.16    7.33
   0   2  -8   56.95   16.23
  -1   8  -4    1.58    2.87
  -1   8  -4    2.17    3.48
   1   8  -4    5.14    4.93
   1   8   4    2.34    1.45
  -1  -8  -4    1.32    0.78
   1  -8  -4    2.23    2.15
  -1   8   4    5.21    5.11
  -1  -8  -4    4.94    2.86
   1  -8  -4    1.99    1.79
  -1  -8   4    1.02    2.21
   1  -8   4    2.79    1.82
   1  -8   4    5.76    2.59
  -1  -8   4    0.91    1.48
   1   8  -4    3.53    1.50
  -1   8   4    2.15    1.78
   1   8   4    3.17    2.93
  14   1   0  309.08   21.34
  14  -1   0  349.59   20.63
  14   1   0  441.81   25.94
 -14   1   0  310.60   18.05
 -14  -1   0  297.63   17.83
 -14   1   0  285.43   17.54
  -9   7   1  264.01   16.31
   9  -7  -1  255.43   15.96
  -9   7  -1  263.35   16.69
   9   7  -1  271.43   19.88
  -9  -7  -1  282.69   20.89
   9  -7   1  270.74   16.79
   9   7  -1  232.70    7.13
  -9  -7   1  266.92   16.72
   9   7   1  236.55   14.34
   9   7   1  275.88   17.51
  -9   7  -1  265.74   16.12
   9  -7   1  242.55   14.96
   9  -7  -1  288.75   17.29
  -9   7   1  252.66   15.31
  -3  -9   0    1.84    2.29
   3   9   0    1.84    2.18
   3   9   0    1.67    2.63
   3  -9   0    3.30    3.84
  -3   9   0    2.25    1.56
  -3   9   0    2.39    1.28
 -14   0   1   -0.17    0.89
 -14   0  -1   -1.15    1.91
 -14   0   1    0.82    1.03
  14   0  -1   -0.10    3.45
  14   0   1   -0.01    3.06
  14   0   1    3.38    2.93
  14   0  -1   -0.26    1.55
  -7  -8   0   -0.56    2.26
   7  -8   0    4.14    2.84
   7   8   0    1.69    2.20
  -7   8   0   -0.58    1.45
  -7   8   0   -1.84    2.42
   7  -8   0    2.94    2.04
   1   2   8   32.04   11.96
  -1   2   8   31.88    8.20
   1   2   8   28.09    9.87
   1  -2   8   23.84    8.10
   1  -2  -8   28.83    6.73
   1   2  -8   37.80   12.98
  -1   2  -8   25.54    2.85
   1  -2  -8   31.98   11.40
  -1  -2  -8   21.73    3.43
  -1  -2   8   30.94   11.85
  -1  -2  -8   30.28    6.78
  -1   2  -8   34.39   13.30
  -1   2  -8   24.96    9.33
   1   2  -8   32.04   10.92
  -1   2   8   37.26   14.28
  -3   6  -6   11.85    4.89
  -3   6   6   17.92    5.24
   3   6   6    2.49    6.93
   3   6  -6   11.50    8.33
   3  -6   6   -0.11    1.28
   3  -6   6    8.95    3.46
   3  -6  -6   10.73    3.88
  -3  -6  -6    6.84    2.66
   3   6   6    7.59    3.21
   3   6  -6   10.59    6.68
  -3   6  -6    8.28    3.25
  -3  -6  -6    8.86    4.85
   3  -6  -6   13.09    6.41
   3   1   8   -0.16    3.44
   3  -1  -8    1.05    0.99
  -3   1   8   -4.13    2.93
   3  -1  -8   -0.27    2.00
   3   1  -8    0.39    0.73
   3  -1   8    4.64    3.86
  -3  -1  -8    1.98    3.26
  -3   1  -8    2.01    1.85
   3   1  -8    1.20    2.04
  -3   1  -8   -0.03    1.62
   3   1   8    2.72    2.63
  -3   1   8    0.51    1.05
  -3   1  -8    0.94    0.87
  -3  -1  -8    1.30    0.66
 -12   2  -4  150.20   18.42
  12  -2  -4  146.95   16.86
  12  -2  -4  142.76   14.60
 -12   2   4  161.84   17.11
 -12   2  -4  127.42   12.52
 -12  -2  -4  141.86   20.54
  12   2  -4  148.38   13.86
  12  -2   4  180.55   17.01
  12   2   4  166.95   20.77
  12   2  -4  146.64   13.82
  12  -2   4  178.24   17.74
  12   2  -4  140.50   15.77
 -12  -2   4  148.27   17.23
  -6   5  -6   10.06    4.97
  -6  -5  -6    2.19    2.58
   6  -5   6    7.54    4.89
  -6  -5   6    4.18    2.27
   6  -5   6   11.86    6.12
   6  -5  -6    3.81    3.15
  -6  -5  -6    2.04    1.99
  -6   5   6    6.72    2.39
   6   5   6    3.05    1.89
  -6   5   6    3.41    1.35
   6   5  -6    3.94    2.93
  -6   5  -6    5.80    4.96
   6   5   6    4.44    2.90
   6   5  -6    2.34    2.31
   6  -5  -6    1.94    1.74
   2  -8   4    5.84    2.59
   2  -8  -4    4.67    3.36
  -2   8  -4    1.60    1.42
   2   8  -4    4.09    3.40
  -2  -8  -4    3.39    1.49
  -2  -8   4    4.15    2.22
   2  -8   4    4.34    1.94
  -2  -8  -4    4.99    2.37
   2  -8  -4    6.51    4.13
  -2   8   4    4.87    2.44
  -2  -8   4    2.66    1.09
  -2   8  -4   10.72    4.57
   2   8   4    7.80    3.08
   2   8   4    5.58    3.45
  -2   8   4    2.28    2.11
  14   1  -1    2.34    3.54
 -14   1   1   -0.64    1.79
 -14  -1   1    1.05    0.89
  14  -1  -1    1.99    1.80
  14  -1   1    0.50    1.39
  14  -1   1    0.18    2.11
 -14  -1  -1    3.21    1.93
  14  -1  -1    1.48    1.75
 -14   1  -1    3.01    2.56
  14   1   1   -0.86    1.91
  14   1  -1    0.03    1.48
 -14   1   1   -0.07    0.90
   5  -8   3   28.84    4.15
   5  -8  -3   32.52    6.68
   5  -8   3   33.66    6.91
  -5   8   3   38.02    8.08
   5   8   3   32.96    4.89
   5   8  -3   36.13    6.00
  -5   8  -3   31.41    9.07
  -5  -8   3   32.91    5.91
   5   8   3   31.65    9.98
  -5   8   3   43.69   11.39
   5   8  -3   29.28   10.23
  -5   8  -3   30.21    4.95
   5   8  -3   29.43    3.37
   5  -8  -3   35.62    8.91
  -5  -8  -3   32.56    6.32
   6   3  -7    3.74    4.50
   6  -3   7    1.36    1.72
   6   3   7    4.10    2.29
   6   3  -7    4.89    3.20
   6  -3  -7    5.71    2.79
  -6   3   7    2.62    1.20
  -6  -3  -7    1.61    2.28
  -6  -3  -7    1.33    2.15
  -6   3  -7    5.24    2.99
   6   3   7    5.63    3.19
   6  -3   7   20.03    8.10
   6  -3  -7    2.84    2.01
  -6   3  -7    5.87    4.66
  -6  -3   7    1.79    2.13
  -6   3   7    1.89    1.18
   0  -9   2    3.47    3.08
   0  -9  -2    0.84    0.97
   0   9  -2    0.78    0.64
   0  -9   2    1.50    1.96
   0   9   2    0.92    1.48
   0  -9  -2    3.53    3.07
   0   9   2    3.02    2.32
  -3   9   1   -0.13    0.84
   3  -9  -1    2.31    2.88
  -3  -9  -1    1.41    2.61
  -3  -9   1    2.81    3.78
  -3   9  -1    1.54    1.75
   3   9  -1   -0.95    2.35
   3   9   1    2.57    2.49
  -3   9   1    3.88    1.69
  -3   9   1    3.41    2.23
   3   9  -1    1.84    1.55
   3   9   1    2.89    2.26
   3  -9   1   -0.14    1.70
   3  -9   1    1.80    2.12
  13   3  -2   21.73    6.11
  13   3  -2   17.39    8.22
  13  -3  -2   17.41    2.85
  13  -3  -2   25.47    6.87
 -13   3  -2   18.83    4.12
  13  -3   2   22.16    8.46
  13  -3   2   22.51   11.22
 -13   3   2   12.89    5.61
 -13   3  -2   18.85    6.17
  13   3  -2   19.58    6.81
 -13  -3  -2   19.98    5.82
  13   3  -2   27.33    7.34
  13   3   2   11.84    7.04
   7   8   1    2.27    3.95
   7  -8   1    8.03    3.62
   7  -8  -1    2.10    2.24
   7   8  -1   10.53    3.60
  -7   8   1    4.60    1.91
   7   8  -1    6.13    2.31
  -7  -8   1    5.14    1.74
  -7  -8  -1    5.41   10.03
   7  -8   1    7.26    3.84
  -7   8   1    7.73    3.73
  -7   8  -1    4.66    3.52
   7   8   1    6.27    2.38
  -7   8  -1   13.05   10.22
   7  -8  -1    4.14    2.09
  -2  -2   8   23.78    8.39
   2  -2  -8   29.59    8.89
   2   2   8   21.92    8.58
   2   2  -8   22.41    8.97
  -2  -2  -8   18.26    3.65
  -2   2  -8   25.51    9.64
  -2   2   8   17.09    5.23
   2   2  -8   28.24    8.91
  -2   2   8   26.72    6.43
   2   2   8   19.16    4.67
   2  -2   8   22.94   10.33
  -2  -2  -8   18.59    6.49
  -2   2  -8   17.32    2.92
   2  -2  -8   18.81    6.68
 -12   5   0   12.08    3.69
  12   5   0   13.43    4.94
  12   5   0    9.80    3.06
 -12   5   0   15.18    4.98
 -12  -5   0   16.49    4.52
  12  -5   0   11.81    4.40
  12   5   0   15.27    5.76
  12  -5   0    6.74    3.23
   1  -9  -2    2.13    2.91
   1   9   2    0.67    1.77
   1  -9   2    3.63    2.94
   1   9   2    1.77    2.40
  -1  -9  -2    0.42    2.61
  -1   9  -2    0.90    1.85
  -1   9   2    2.07    2.05
  -1   9   2    4.04    3.71
  -1  -9   2    4.73    3.23
  -1   9  -2   -0.04    2.14
   1  -9   2    0.18    1.01
   1  -9  -2    0.59    0.83
  -1  -9  -2    1.39    0.98
  -7   2   7   10.96    4.95
   7   2   7   15.83    4.33
  -7   2   7   15.31    7.21
   7   2  -7   14.59    3.63
  -7  -2  -7   11.49    4.25
   7  -2  -7   12.13    5.29
   7  -2  -7   14.99    7.55
   7   2  -7   16.62    5.52
  -7  -2  -7   11.12    4.94
   7   2   7   19.54    7.65
  -7   2  -7   13.94    8.20
   7  -2   7   15.21    4.38
  -7  -2   7    4.67    2.37
   7  -2   7   22.19    6.92
   7   2  -7   27.02   10.16
  -7   2  -7   18.30    6.24
   0   5   7    8.56    4.06
   0   5  -7    7.23    4.36
   0  -5   7    2.69    2.12
   0   5  -7    3.24    6.31
   0   5   7    9.42    3.98
   0  -5  -7    9.88    4.58
   0  -5  -7   13.70    3.99
  -1  -5  -7    2.48    2.91
   1   5   7    4.42    2.70
   1  -5  -7    3.40    2.96
  -1  -5  -7    4.89    2.26
   1  -5   7    4.78    4.38
  -1   5   7    6.53    2.88
   1   5   7    3.93    3.30
   1  -5  -7    3.02    3.08
  -1   5   7    1.46    1.85
   1   5  -7    4.00    3.99
  -1   5  -7    3.83    2.21
  -1  -5   7    0.97    1.79
  -1   5  -7    3.80    3.61
   1   5  -7    2.79    2.65
 -11  -2  -5  107.24   14.87
  11   2  -5  154.92   21.58
 -11   2  -5  142.20   15.49
 -11  -2   5  113.31   10.49
 -11   2  -5  103.99    9.22
  11  -2  -5  150.42   20.55
  11   2   5  134.97   21.23
  11  -2   5  160.59   23.12
 -11   2   5  133.95   12.63
  11   2  -5  199.91   18.17
  11   2   5  142.29   18.12
  11  -2  -5  176.31   16.46
  11  -2   5  125.99   17.02
  -4   7  -5    6.88    4.65
  -4   7   5    8.12    4.60
  -4   7   5    5.21    4.18
   4  -7  -5   10.42    4.26
   4  -7  -5    5.40    3.28
   4   7   5    9.28    6.47
  -4  -7  -5    4.84    2.27
   4  -7   5    8.85    4.37
  -4  -7   5   12.35    4.35
   4   7  -5    6.96    2.97
   4  -7   5    4.11    1.80
   4   7  -5    4.75    4.84
  -4  -7   5    5.70    2.73
  -4   7  -5    7.87    3.83
  -4   0  -8  198.51   17.64
  -4   0  -8  203.50   23.61
   4   0  -8  211.66   18.27
  -4   0   8  195.64   17.55
   4   0   8  172.35   16.41
   4   0  -8  195.86   20.64
 -13   2  -3    5.96    2.86
  13   2  -3    9.47    3.68
 -13  -2   3    8.76    4.37
 -13   2   3    6.23    3.09
  13  -2   3   11.43    6.76
  13   2  -3   10.18    2.65
  13   2   3   23.72   10.84
  13  -2   3    4.81    4.87
  13   2   3   15.36    4.82
  13  -2  -3    9.99    4.51
 -13   2  -3    8.67    2.25
  13   2  -3   12.76    5.14
 -13  -2  -3   11.16    3.71
 -11   6   0    1.37    1.63
  11   6   0    0.43    0.74
 -11   6   0    0.30    1.10
  11   6   0   -0.41    2.57
  11  -6   0    0.05    1.93
 -11  -6   0    0.20    1.08
  11  -6   0    5.38    3.37
   8  -7  -3   16.88    7.61
   8   7  -3    3.84    1.63
  -8  -7  -3    7.73    2.62
  -8  -7  -3    7.59    4.68
  -8   7  -3    1.60    1.96
   8   7  -3    1.76    3.27
  -8   7  -3    5.80    3.11
   8   7   3    1.47    2.03
  -8   7   3   21.41    4.45
   8   7  -3    7.85    3.99
   8   7   3   20.62    8.22
   8  -7   3    3.98    2.16
   8  -7  -3   10.55    5.77
 -14   2   0  173.84   15.13
  14  -2   0  179.84   15.80
  14   2   0  173.04   24.16
 -14  -2   0  171.85   15.83
  12   5   1    9.38    8.43
  12   5  -1    4.21    3.87
  12   5  -1    6.60    3.16
 -12   5   1    0.91    1.09
 -12   5  -1    2.79    1.63
 -12  -5   1    3.26    1.76
  12   5   1    2.29    1.42
  12   5  -1    6.18    2.51
  12  -5   1    6.78    3.30
  12  -5  -1    6.74    3.09
 -12   5  -1    3.41    3.64
 -12   5   1    0.03    1.25
  12  -5  -1    4.64    2.96
  12  -5   1    7.82    3.40
   2  -9  -2    5.38    2.56
  -2   9   2    4.58    2.07
   2  -9   2    6.93    3.46
  -2  -9  -2    3.59    1.04
   2   9  -2    3.18    3.01
  -2   9  -2    6.67    4.06
   2   9   2    6.76    3.03
  -2   9  -2    3.97    2.18
  -2  -9   2    6.49    2.97
   2   9   2    3.96    4.69
   2  -9  -2    6.35    1.99
   2   9  -2    4.07    2.07
   2  -9   2    8.47    3.69
  -2  -9  -2    8.28    3.89
 -11  -4  -4   13.80    4.82
  11   4  -4   14.18    6.55
  11  -4  -4   14.16    4.21
  11  -4  -4   20.08    6.14
  11  -4   4   22.11    7.78
  11   4   4   12.81    2.31
  11   4  -4   18.48    7.43
  11   4   4   18.10   10.42
  11   4  -4   14.26    4.58
 -11   4   4   21.82    6.99
  11  -4   4   11.33    5.07
  11   4   4   18.77    8.85
 -11   4  -4   18.97    5.51
  11   4  -4   14.52    4.08
  10  -5   4  370.98   24.28
 -10  -5  -4  240.99   16.35
 -10   5  -4  225.96   12.63
 -10   5   4  278.40   19.26
  10   5  -4  239.63   17.67
  10  -5   4  256.39   14.39
  10   5  -4  236.41   14.35
 -10   5  -4  258.56   16.03
  10  -5  -4  256.53   15.14
  10  -5  -4  282.51   19.23
 -10  -5  -4  251.70   14.56
  10   5  -4  222.90    8.01
  10   5  -4  195.12   23.63
   4  -9   0    6.82    3.61
   4  -9   0    3.24    2.30
  -4  -9   0    3.26    2.58
  -4   9   0    3.73    2.49
   4   9   0    5.28    2.34
   4   9   0    5.42    4.09
  -4   9   0    2.38    1.24
  11   5  -3    2.47    1.80
  11   5   3    2.32    0.94
 -11   5   3    5.54    2.70
  11  -5  -3    6.47    4.39
  11   5   3    6.73    5.29
  11  -5   3    2.97    3.24
  11  -5  -3    2.43    1.16
  11   5  -3    6.65    4.37
  11  -5   3    6.38    3.41
  11   5  -3    2.20    2.11
  11  -5  -3    2.80    2.66
 -11   5  -3    2.79    2.32
 -11   5  -3    1.32    2.10
  11   5  -3    2.17    1.86
 -11  -5  -3   10.13    5.41
   3  -8  -4    5.96    2.62
  -3  -8  -4    2.89    1.13
  -3  -8   4    3.37    1.95
  -3   8   4    5.88    3.08
   3   8   4    2.77    2.48
  -3   8  -4    3.60    3.16
  -3   8   4    4.71    2.59
   3   8   4    1.83    1.34
  -3  -8   4    0.22    1.82
   3  -8   4    5.43    2.23
   3  -8  -4    4.59    1.87
   3   8  -4    5.53    3.20
  -3   8  -4    4.01    2.14
   3   8  -4    2.54    2.26
  -3  -8  -4    4.52    2.17
 -10   0   6  211.99   19.83
  10   0  -6  201.03   21.77
  10   0  -6  197.71   21.07
  10   0   6  242.70   21.38
 -10   0  -6  212.46   22.12
 -10   0   6  188.47   16.41
 -13   4   0    2.20    1.86
 -13   4   0   -1.14    1.90
  13  -4   0    3.16    2.61
  13   4   0    3.34    3.25
  13  -4   0    2.37    2.34
 -13  -4   0    0.47    1.02
  13   4   0    1.30    1.10
  13   4   0    2.97    3.23
  -4  -6  -6  767.82   38.90
   4   6  -6  817.55   40.43
   4  -6  -6  846.50   41.89
   4  -6   6  776.83   41.32
  -4   6   6  874.10   42.49
  -4   6  -6  773.26   40.65
   4  -6  -6  830.03   41.47
  -4  -6  -6  756.86   37.48
  -4   6  -6  716.72   42.90
   4   6   6  850.48   41.94
  -4  -6   6  760.09   38.12
   4  -6   6  860.74   42.07
   5  -4   7   84.99   17.54
   5   4   7   77.81    9.88
   5  -4   7   55.69    9.08
  -5  -4  -7   67.55   11.07
   5  -4  -7   69.05   10.61
   5   4   7   60.61    8.28
  -5   4   7   85.49   10.01
  -5   4  -7   84.77   14.57
   5   4  -7   77.91   11.71
   5  -4  -7   65.40    9.98
  -5   4   7   69.52    9.64
  -5   4  -7   69.85   14.05
  -5  -4  -7   69.09   10.71
  -5  -4   7   65.32    7.68
  -4   1  -8  544.19   28.09
   4   1   8  500.48   26.28
   4  -1  -8  485.68   26.42
   4   1  -8  515.69   26.99
  -4   1   8  489.74   25.36
  -4   1  -8  541.07   29.16
  -4   1  -8  500.60   34.16
  -4  -1  -8  508.87   27.93
  -4  -1  -8  522.94   27.39
   4   1  -8  503.53   24.63
   4  -1  -8  508.63   26.10
  -4   1   8  464.54   24.38
   4   1   8  511.47   28.02
   4  -1   8  490.53   30.18
  -4  -1   8  420.55   23.18
  -2   5   7    5.55    5.80
  -2   5   7    1.30    1.45
   2   5  -7   -1.11    2.25
   2  -5   7    0.58    2.08
  -2  -5   7    3.94    2.27
  -2  -5  -7    2.61    2.48
   2   5   7   -0.21    2.12
   2  -5   7    1.57    1.28
  -2   5  -7    7.67    4.09
   2   5   7    1.32    1.76
  -2  -5  -7    2.82    2.62
   2  -5  -7    0.43    1.49
   2  -5  -7    2.10    2.75
   2   5  -7    8.11    4.87
  -2   5  -7    1.50    2.55
  -7   6   5   96.32   12.44
   7  -6   5   99.28   12.05
   7  -6   5   90.58   11.18
   7  -6  -5  105.39   10.87
  -7   6   5  100.73   13.31
  -7  -6  -5   88.13   12.02
   7   6   5   97.74   10.65
  -7   6  -5   96.93   16.46
   7   6  -5   89.62   15.98
  -7  -6   5   97.96   12.45
  -7   6  -5  112.00   18.83
   7  -6  -5   95.46   13.01
   7   6  -5   66.96    7.74
  -7  -6   5   84.47    9.86
   3  -2  -8   13.70    6.16
   3   2  -8   12.08    5.78
   3  -2   8   19.91    7.15
   3   2   8   15.46    5.19
  -3   2  -8   26.85    9.74
  -3   2  -8   15.08    3.36
   3  -2  -8   10.84    4.50
   3   2  -8   17.49    7.02
  -3  -2  -8   12.05    4.27
  -3  -2   8   15.08    7.08
  -3   2   8   15.10    5.91
   3   2   8   19.50    7.69
  -3  -2  -8   18.85    8.40
   9  -7   2    2.93    2.75
  -9  -7  -2    2.41    3.20
  -9  -7   2    3.00    2.33
   9   7  -2    2.26    2.33
   9  -7  -2    0.64    1.26
  -9  -7  -2    0.78    1.51
   9   7   2    1.69    2.21
   9   7  -2    1.02    0.75
   9  -7  -2    0.96    2.44
   9  -7   2    4.45    4.79
   9   7  -2    0.52    1.21
  -9   7   2    3.31    4.39
  -9   7  -2    2.16    2.21
  -8  -4  -6    5.07    2.34
  -8   4  -6   50.35   16.81
   8   4  -6   13.89    3.67
  -8  -4  -6    6.68    2.44
   8  -4  -6   18.46    4.71
   8  -4   6    6.18    4.01
  -8   4   6   16.85    6.71
   8  -4  -6   21.09    6.06
   8   4   6    4.75    3.24
  -8   4  -6    7.73    4.65
   8   4  -6   16.98    6.18
   8   4  -6   10.81    3.88
  -8  -4   6   15.07    4.68
  14   0  -2   46.48   13.13
  14   0   2   44.02   12.11
  14   0  -2   30.06    2.76
  14   0   2   39.68    6.15
 -14   0  -2   26.86    8.33
 -14   0   2   25.03    6.09
  12   4  -3   24.18    6.18
  12   4   3   11.21    5.97
  12  -4   3   21.12    8.27
  12   4   3   26.83   11.03
  12  -4   3   25.78   10.78
  12  -4  -3   17.00    5.31
  12  -4  -3   28.24    8.19
  12   4  -3   15.08    4.63
 -12   4   3   22.45    6.94
  12   4  -3   18.27    4.48
 -12   4  -3   21.74    5.79
 -12   4  -3   21.09    7.49
  12   4  -3   30.89    9.07
 -12  -4  -3   20.34    6.27
   9   3  -6   49.53   10.24
   9  -3   6   39.69    7.62
  -9  -3  -6   46.96    8.39
  -9  -3   6   40.19    3.62
   9  -3  -6   44.45    7.32
  -9   3   6   47.70    9.65
  -9   3  -6   37.24    8.05
  -9   3  -6   56.25   15.27
   9   3  -6   50.20    9.76
   9  -3  -6   45.64    8.17
   9   3   6   41.26    3.62
   9   3   6   44.48    4.39
   9   3  -6   42.83    8.91
   9  -3   6   58.93   21.40
  11  -6  -1    6.66    3.44
  11  -6  -1    8.15    3.15
  11   6   1    3.67    2.40
  11   6  -1   10.15    4.10
 -11  -6   1    3.36    1.82
  11   6   1    5.46    2.35
  11   6  -1    2.43    2.43
  11  -6   1    4.84    3.17
 -11  -6  -1    4.45    2.46
 -11   6  -1    4.73    2.17
 -11   6   1    7.59    3.38
  11  -6   1    3.13    3.60
 -11   6   1    3.70    2.78
 -11   6  -1    4.24    3.04
 -14   2   1    3.73    2.00
 -14  -2  -1   13.28    4.47
  14  -2   1   24.22    7.47
  14   2  -1    6.08    3.48
  14   2   1    7.74    3.70
 -14   2  -1    6.11    1.84
  14  -2   1    7.62    2.58
 -14   2   1   11.07    4.24
  14  -2  -1    9.20    4.02
 -14  -2   1   12.44    3.84
  14  -2  -1   11.12    3.47
  14   2   1   16.49    8.91
 -14   2  -1   13.48    5.37
  14   2  -1   15.01    5.73
   8   0   7    5.33    3.61
  -8   0  -7   -0.23    2.76
   8   0  -7    5.54    7.90
   8   0  -7    4.62    2.06
   8   0   7    6.92    3.23
  10   1  -6  163.60   14.79
  10   1   6  172.77   20.82
  10  -1   6  172.78   25.19
 -10  -1   6  191.37   19.48
 -10  -1  -6  136.61   16.12
  10   1   6  204.16   19.26
  10   1  -6  170.22   17.12
  10  -1   6  209.94   29.74
 -10  -1   6  147.87   13.00
 -10   1  -6  148.85   21.08
 -10   1  -6  140.09   13.66
 -10   1   6  186.35   22.81
  10  -1  -6  166.00   17.15
  -4   9  -1    1.91    2.63
   4   9   1    0.38    2.04
   4   9  -1    6.01    4.46
   4   9   1    0.95    2.31
  -4   9   1    4.30    3.16
   4  -9  -1    2.45    3.04
  -4   9   1    0.69    1.10
   4  -9   1    1.10    1.84
   4   9  -1    2.30    1.96
   4  -9   1    2.17    1.20
  -4  -9   1    0.84    1.03
  -4  -9  -1    3.44    3.03
  -4   9   1    1.99    1.89
 -13  -4   1   73.84    8.89
 -13   4   1   77.88    9.94
 -13   4  -1   77.88    9.04
  13   4  -1   66.08    9.78
  13  -4   1  101.89   17.37
  13   4  -1   64.51   11.59
  13   4   1   86.33   23.48
 -13   4  -1  101.26   19.50
 -13   4   1   76.45   11.24
  13  -4  -1   62.19   11.74
  13   4   1   64.25   11.26
  13   4  -1   86.10   10.25
  13  -4   1   79.90   12.21
 -13  -4  -1   65.97    7.92
   0   3   8    2.00    2.17
   0   3   8    1.61    2.00
   0  -3  -8    1.57    1.67
   0   3  -8    2.06    3.06
   0   3  -8    2.16    2.90
   0  -3   8    5.27    3.83
   0  -3  -8    0.50    1.96
  14   1   2   47.86   12.05
 -14  -1   2   41.46    6.63
 -14  -1  -2   36.02    4.82
 -14   1   2   26.72    6.16
 -14   1  -2   44.16    8.30
  14   1  -2   37.47    5.40
  14  -1   2   56.10   17.56
  14   1   2   52.82   15.22
  14  -1   2   48.49   12.90
  14   1  -2   44.17    5.61
  14  -1  -2   32.42    4.79
  14  -1  -2   30.14    4.72
   3  -9   2    8.54    4.14
   3  -9  -2    8.64    2.25
  -3   9   2    9.50    4.75
  -3   9  -2    4.43    2.69
   3   9  -2    7.36    3.06
   3   9  -2   12.35    4.81
   3  -9  -2    9.06    4.01
   3   9   2   10.38    4.21
  -3   9   2    9.72    4.65
   3   9   2    9.53    2.70
  -3   9  -2    8.80    4.93
  -3  -9   2    8.75    2.64
   3  -9   2    7.44    2.96
  -3  -9  -2    7.72    5.46
   7   8   2   29.71    5.51
   7  -8  -2   33.24    8.66
   7   8   2   38.58   11.46
   7  -8  -2   33.03    3.69
   7   8  -2   29.81    9.89
  -7   8  -2   30.01    5.88
  -7   8   2   34.76   11.33
   7  -8   2   31.23    7.77
   7   8  -2   28.29    6.97
  -7  -8  -2   32.15    9.07
  -7  -8   2   34.74    6.58
   7  -8   2   33.02    6.67
  -7   8  -2   14.44    3.90
   1   3   8   25.18    6.16
  -1   3   8   31.17   10.05
   1   3   8   31.48   11.78
  -1  -3  -8   29.06    8.96
   1  -3   8   30.34   11.01
  -1   3   8   26.79    8.59
  -1  -3   8   32.95   11.70
  -1  -3  -8   28.12    7.40
   1   3  -8   61.50   11.49
   1  -3  -8   25.94   11.59
   1   3  -8   22.17   10.98
  -1   3  -8   24.02    8.33
   1  -3  -8   28.37    8.70
  -1   3  -8   22.57    4.75
   8  -1   7    4.43    2.69
   8   1   7    6.18    3.18
   8   1   7    6.17    3.26
  -8  -1   7    7.22    3.83
   8  -1   7    8.57    4.09
   8   1  -7    4.69    2.95
  -8  -1   7    4.50    2.33
   8   1   7   12.61    8.34
   8   1  -7    8.08    4.46
  -8   1   7    8.27    3.58
  -8   1  -7    9.76    4.97
  -8  -1  -7    4.64    3.18
   8  -1  -7    6.68    3.27
   8  -1  -7    6.05    3.74
  -8   1   7    1.34    1.08
  -8   1  -7    5.99    3.01
 -10   6  -3    2.01    2.17
 -10  -6  -3    0.43    1.13
  10  -6   3    5.75    4.80
  10  -6   3    2.40    2.17
  10   6  -3    1.42    1.53
  10  -6  -3    4.37    2.90
  10   6  -3    1.51    0.70
 -10   6   3   -0.83    2.23
 -10   6  -3    0.08    1.89
  10  -6  -3    0.71    0.75
  10   6   3    6.44    4.71
  10   6   3    0.83    1.05
  10   6  -3    3.88    2.92
 -10  -6  -3    3.49    2.69
  -7  -7  -4    2.37    2.68
  -7   7  -4    5.36    3.22
   7  -7  -4    3.79    4.04
   7  -7   4    0.24    1.86
   7   7  -4   14.63    6.03
   7   7   4    3.84    1.91
  -7  -7  -4    8.18    3.82
   7  -7   4    6.17    2.45
   7   7  -4    4.11    2.34
  -7  -7   4    4.08    2.60
  -7   7   4    3.05    1.79
  -7   7   4    5.87    1.85
  -7   7  -4   10.49    3.83
   7   7   4    6.56    4.46
   7  -7  -4    4.60    2.85
  10  -4  -5    4.87    3.29
  10  -4   5    6.09    3.42
  10   4  -5    3.84    4.27
  10   4   5    3.19    1.98
  10   4  -5    3.98    1.92
  10  -4  -5    5.89    2.03
 -10  -4   5    2.52    1.47
 -10   4   5    5.54    3.18
 -10  -4  -5    5.62    2.85
  10  -4   5    3.20    3.20
  10   4   5    3.14    1.80
  10   4  -5    4.07    2.63
 -10   4  -5    2.80    2.21
   3   5   7   23.04    8.58
   3   5   7   22.64    8.19
  -3  -5  -7   25.56    6.80
  -3  -5  -7   19.84    8.80
  -3   5  -7   24.75   10.02
  -3   5   7   26.60    8.21
   3   5  -7   22.63    7.92
   3   5  -7   16.54    7.28
  -3  -5   7   22.17    7.55
  -3   5  -7   13.35    3.65
   3  -5  -7   19.31    8.44
   3  -5  -7   22.11    7.00
   3  -5   7   17.05    6.14
   3  -5   7   42.39   11.32
  12   3   4   11.69    6.34
  12  -3   4   32.65   12.79
  12   3  -4    7.46    3.02
  12  -3   4   10.56    4.18
  12  -3  -4    9.89    3.25
 -12   3   4   12.01    3.99
 -12   3  -4   25.67    5.17
  12  -3  -4    5.99    2.48
  12   3   4    4.11    4.65
  12   3  -4    5.06    1.46
 -12   3  -4   29.92    8.67
  12   3  -4    3.91    1.78
  12   3  -4    4.56    2.60
 -12  -3  -4    7.28    3.53
  -6   8  -3    4.33    3.73
   6   8   3    0.94    2.49
   6  -8   3    1.47    3.18
  -6  -8   3    1.53    2.16
  -6  -8  -3    3.43    3.44
   6  -8  -3    0.36    1.24
  -6   8   3    4.81    1.63
   6  -8   3    2.15    1.99
   6   8  -3    0.86    0.72
  -6  -8  -3    1.32    0.88
   6  -8  -3    5.88    3.47
   6   8  -3    3.61    3.82
  -6   8   3    3.24    1.52
   6   8  -3    3.14    1.91
   6   8   3    2.88    3.15
  -6   8  -3    5.10    2.90
   9  -6  -4   11.24    6.04
   9   6  -4   29.23   13.38
   9   6   4    2.43    1.55
  -9   6   4    2.13    2.52
  -9  -6  -4    3.63    3.00
   9  -6  -4    4.42    4.21
   9   6   4    2.23    2.89
   9  -6   4    6.37    5.11
   9  -6   4   13.33    6.37
  -9   6  -4    5.22    4.45
  -9  -6  -4    2.65    4.17
   9   6  -4    2.38    2.15
   9   6  -4    0.29    1.02
  -9  -6   4   13.62    6.14
  -9   6  -4    1.21    1.12
  -4   8   4   33.07    8.21
   4  -8   4   29.43    6.55
   4  -8  -4   25.92    8.94
   4   8  -4   19.11    6.51
  -4  -8   4   22.96    5.08
   4  -8   4   26.00    3.83
  -4  -8  -4   26.19    6.10
   4  -8  -4   20.86    3.40
  -4  -8   4   20.83    3.87
  -4  -8  -4   24.21    9.53
   4   8   4   22.60    5.81
  -4   8  -4   22.81    7.80
  -4   8  -4   31.02    9.23
  -4   8   4   26.00    5.53
   4   8   4   21.15    9.68
   4   8  -4   46.13   11.94
   9  -5  -5   72.17   10.34
   9  -5   5   67.90   12.25
  -9   5  -5   74.92   13.97
   9   5   5   82.13   10.27
   9  -5  -5   75.56   12.83
   9  -5   5   66.79    8.77
  -9  -5   5   74.33    9.68
   9   5  -5   82.03   12.03
  -9  -5  -5   86.26   13.80
   9   5  -5   76.92   19.93
  -9   5  -5   84.53   15.06
  -9  -5  -5   84.92   14.96
   9   5   5  100.75   11.69
   9   5  -5   78.26   10.46
  -9   5   5   93.54   14.43
  -5   7  -5  234.59   19.30
  -5  -7  -5  198.78   17.67
  -5  -7   5  213.35   18.47
   5  -7   5  234.06   14.21
   5  -7   5  247.66   13.50
   5   7   5  222.10    6.39
   5  -7  -5  227.85   14.02
  -5   7   5  230.96   14.74
  -5  -7   5  235.61   13.47
   5  -7  -5  220.65   11.10
  -5   7   5  229.66   14.72
  -5   7  -5  204.91   18.66
   5   7  -5  220.21    6.27
   5   7  -5  227.59   14.90
  -5   0  -8    1.37    2.19
  -5   0   8    3.88    2.75
   5   0   8    5.06    3.57
   5   0  -8    2.89    1.42
  -5   0  -8    1.37    1.62
  -7   5  -6    9.43    4.05
  -7  -5   6   15.27    5.41
   7   5   6    9.74    4.31
  -7   5   6    8.50    2.31
   7  -5  -6   12.95    5.11
   7   5   6   11.88    4.55
  -7   5  -6   14.88    6.17
  -7  -5  -6   13.92    6.17
  -7   5   6   11.77    4.05
  -7  -5   6    7.14    1.47
  -7  -5  -6   10.08    4.96
   7  -5  -6   10.47    6.94
   7  -5   6   11.30    4.29
   7   5  -6   10.34    4.15
   7   5  -6    9.45    3.92
   2   3  -8    0.87    2.41
   2  -3  -8    0.52    2.34
  -2  -3  -8    1.65    2.00
   2   3  -8    2.48    2.10
  -2   3  -8    2.21    4.00
   2   3   8    2.57    2.40
  -2  -3  -8    3.64    1.96
  -2   3  -8    4.68    4.28
   2  -3  -8    1.59    1.85
   2  -3   8   13.82    6.19
  -2  -3   8    3.09    3.41
  -2   3   8    1.49    3.15
   2   3   8    1.46    3.09
  -2   3   8   -0.41    1.94
   8  -8   0   79.85   11.04
  -8  -8   0   77.08    9.71
   8   8   0   65.88    7.75
  -8   8   0   73.39    9.08
  -8   8   0   80.12   10.16
   8  -8   0   62.54    7.89
   8   8   0   67.57    8.14
   4   2   8   47.73   11.20
  -4   2   8   57.69   14.05
   4  -2   8   44.56    5.54
  -4  -2  -8   49.57    7.11
   4  -2  -8   48.32   14.35
   4  -2  -8   36.24    5.51
   4   2   8   45.59   11.75
  -4   2   8   49.76    9.37
   4   2  -8   42.76    9.95
  -4  -2  -8   48.17   15.59
   4   2  -8   44.77    8.34
  -4   2  -8   42.36    7.64
   4  -2   8   54.48   16.15
  -4  -2   8   51.61   20.27
 -12   5  -2   -0.38    1.11
  12  -5  -2    6.31    3.74
  12   5  -2    2.25    1.63
 -12   5   2    1.22    1.18
  12   5   2    6.88    4.05
  12   5   2    4.57    2.13
  12  -5   2    9.96    4.76
  12   5  -2    3.20    2.94
  12   5  -2    4.04    3.43
  12  -5   2    4.61    4.85
  12   5  -2    5.92    2.28
 -12  -5  -2   16.09    4.77
 -12   5  -2    4.69    2.12
  12   5   2    1.98    2.24
   7  -3   7   16.15    4.86
  -7  -3  -7   16.07    5.42
   7   3  -7   16.77    6.61
  -7  -3   7   18.20    5.22
  -7   3   7   24.41    7.75
   7  -3  -7   17.87    6.86
   7   3  -7   13.89    3.15
   7   3  -7   14.98    7.37
  -7  -3  -7   21.13    6.82
   7  -3  -7   12.67    4.85
   7   3   7   14.06    5.94
   7   3   7   14.85    5.51
  -7   3   7   13.38    3.45
  -7   3  -7   11.09    8.61
   7  -3   7   20.05    6.81
   5   9   0    1.88    1.60
  -5  -9   0    4.72    3.60
  -5   9   0    2.12    1.36
   5  -9   0    1.63    1.52
  -5   9   0    0.12    1.51
   5   9   0   -0.08    2.03
   5  -9   0    1.84    2.08
  10   7   0  381.85   20.69
 -10   7   0  403.14   20.94
 -10  -7   0  406.13   21.74
 -10   7   0  416.86   21.55
  10  -7   0  478.25   25.79
  10  -7   0  371.59   19.35
  10   7   0  433.13   23.58
  -5   6  -6    2.26    2.35
  -5  -6  -6    2.85    3.39
  -5   6  -6    3.22    1.68
   5  -6   6   10.86    4.03
   5   6   6    2.02    2.34
  -5   6   6    4.75    2.58
   5   6   6   -5.14    4.32
  -5   6   6    0.75    1.15
  -5  -6   6    2.80    2.39
   5  -6   6    1.80    1.82
   5  -6  -6    0.61    3.54
  -5  -6  -6   -0.04    1.97
   5   6  -6    2.94    3.69
   5  -6  -6    8.90    4.76
   5   6  -6    3.45    2.30
  10  -2  -6   32.42    6.60
  10   2   6   22.28    9.87
  10  -2  -6   28.77   10.78
  10   2  -6   25.24    7.52
  10   2   6   23.87    9.86
  10  -2   6   23.77   10.10
  10  -2   6   24.70   13.23
  10   2  -6   25.17    6.21
 -10  -2  -6   15.41    6.15
 -10   2  -6   24.64    7.94
 -10   2  -6   12.59    2.97
 -10   2   6   29.18    8.86
 -10  -2   6   20.92    4.44
  11   3   5   67.24   17.34
 -11   3  -5   48.22   12.13
  11   3  -5   71.79   18.09
  11  -3  -5   56.37   12.08
  11  -3  -5   45.33   12.62
  11   3  -5   76.00   12.25
 -11   3  -5   45.93    8.96
 -11   3   5   59.54   11.60
  11   3   5   79.53   10.44
  11  -3   5   81.02   22.78
  11  -3   5   78.69   11.35
  11   3   5   69.89   17.34
  11   3  -5   79.79   13.08
 -11  -3  -5   68.41   12.12
 -11  -3   5   49.28    6.85
  -5   1   8    0.45    3.57
  -5   1  -8   10.05    4.00
   5   1  -8    3.67    1.23
   5   1  -8    1.73    2.57
  -5  -1  -8    8.49    3.25
  -5   1  -8    2.02    2.40
  -5  -1   8   -0.54    2.02
  -5  -1  -8    5.63    3.17
  -5   1   8    2.45    2.38
   5   1   8   12.08    4.86
   5   1   8    4.49    3.98
  -5  -1   8    9.11    5.33
   5  -1  -8    6.73    2.91
   5  -1  -8    6.80    3.11
  13   0   4    4.64    5.57
  13   0  -4    0.23    0.43
 -13   0   4    2.43    2.54
 -13   0  -4    0.52    4.22
  13   0  -4    0.09    2.24
  13   0   4    1.71    3.11
  13   0  -4    3.18    2.55
   0   9   3    2.31    2.48
   0   9  -3    2.79    2.91
   0  -9  -3    1.36    2.32
   0  -9  -3    0.38    0.68
   0  -9   3    0.18    1.71
   0  -9   3    4.26    2.06
   0   9   3    1.90    2.13
 -13  -3  -3   24.85    9.76
  13  -3   3   17.25    8.11
  13   3  -3   22.43    6.78
 -13   3   3   34.46   10.15
  13  -3  -3   25.67    7.57
  13  -3  -3   16.01    3.20
  13   3  -3   27.30    7.91
 -13   3  -3   20.75    4.03
  13   3  -3   26.04   10.32
  13  -3   3   28.72    9.95
  13   3  -3   29.76   11.42
 -13   3  -3   20.54    6.46
  13   3   3   28.49    7.45
  -8  -8  -1   10.79    4.00
   8  -8  -1   11.97    4.10
   8  -8   1   10.39    5.18
   8   8  -1    8.12    2.90
  -8   8  -1   10.84    3.82
   8  -8  -1   14.03    4.90
   8   8   1   10.68    3.36
  -8   8   1    7.83    3.49
  -8   8   1   11.82    4.61
   8   8  -1   14.70    4.28
   8  -8   1   10.70    7.04
  -8   8  -1    3.48    2.50
  -8  -8   1   16.70    3.84
 -14   3   0   15.28    3.96
 -14   3   0   40.53    8.51
 -14  -3   0   28.44    4.91
  14   3   0   36.26    9.70
  14  -3   0   33.70    7.69
  14  -3   0   30.98    4.14
  14   3   0   19.40    6.70
 -11   6   2    0.82    1.70
 -11  -6  -2    3.10    1.79
 -11   6  -2    1.12    1.51
  11  -6  -2    1.85    1.51
  11   6  -2    6.98    2.71
 -11   6  -2    1.06    1.40
  11  -6   2    3.57    3.82
  11  -6   2    2.04    3.08
  11   6  -2    1.33    1.63
  11   6   2    1.32    2.30
  11   6  -2    1.48    1.58
  11   6   2    2.06    1.29
  11  -6  -2    8.35    5.40
 -11  -6  -2    3.61    4.11
  11   6  -2    7.31    5.12
  14  -2   2   11.05    4.76
 -14  -2  -2    6.33    3.59
 -14   2  -2    6.28    1.56
 -14  -2   2    1.75    1.73
 -14   2  -2    4.56    2.83
  14  -2   2    8.38    4.29
 -14   2   2    8.67    3.19
  14   2   2   15.06    9.13
  14  -2  -2    8.79    5.18
  14   2  -2    9.77    4.25
  14   2  -2    8.85    3.18
  14   2   2    6.49    3.25
  14  -2  -2   11.10    2.34
  -1   9  -3    3.33    2.05
  -1  -9  -3    6.95    2.73
   1  -9  -3    5.85    1.90
  -1  -9   3    7.42    2.47
  -1   9   3    1.61    1.14
   1  -9   3    3.92    2.46
   1   9   3    7.52    4.27
  -1  -9   3    4.03    1.90
  -1   9   3    5.27    3.28
   1  -9  -3    4.32    1.77
  -1  -9  -3    4.62    1.72
  -1   9  -3    6.47    3.91
   1   9   3    5.00    2.87
  -4   9   2   24.87    4.75
   4  -9   2   23.89    5.78
   4   9   2   21.49    8.61
   4   9   2   29.86    9.52
   4  -9   2   26.04    7.07
  -4  -9  -2   26.01    8.10
  -4   9  -2   28.36    8.30
  -4   9   2   23.27    6.80
   4  -9  -2   28.45   12.53
  -4  -9   2   24.04    8.42
   4   9  -2   25.79    6.60
   4   9  -2   31.42   11.27
 -12   0  -5    5.62    4.97
  12   0   5   -0.04    4.60
 -12   0  -5   -0.59    1.04
  12   0  -5    1.72    1.41
  12   0   5    0.93    4.42
 -12   0   5    2.23    2.88
  12   0  -5    0.64    1.48
   5   9  -1    3.40    3.53
  -5   9   1    2.94    1.47
   5  -9  -1    2.46    2.25
  -5   9   1    2.32    2.18
  -5  -9   1    1.57    2.21
   5  -9   1    4.04    2.01
   5  -9   1    1.87    2.52
   5   9   1    5.15    3.05
  -5  -9  -1    3.70    2.24
   5   9  -1    5.42    3.66
  -5   9  -1    3.70    2.34
   5   9   1    0.69    1.12
 -10   7   1    2.88    2.66
 -10   7  -1    7.06    3.98
  10   7  -1    5.44    2.08
 -10  -7   1   -0.16    2.94
  10  -7  -1    3.50    2.90
  10  -7   1    5.78    3.57
  10  -7  -1    2.57    1.99
 -10   7  -1    0.22    0.93
 -10  -7   1    2.86    1.04
  10   7  -1    4.43    2.27
 -10  -7  -1    6.53    2.91
  10  -7   1    4.59    2.29
  10   7   1    4.46    3.72
 -10   7   1   -0.09    1.29
  10   7   1    6.29    3.14
  -8   2   7   19.68    4.65
  -8  -2  -7   22.29    6.51
  -8   2  -7   17.91    5.24
   8  -2  -7   23.06    7.67
   8   2  -7   25.80    6.79
   8  -2   7   19.91    7.54
   8  -2   7   25.45    6.66
  -8  -2   7    9.51    3.79
   8   2  -7   36.78   13.28
  -8   2   7   33.97   12.04
   8   2   7   19.19    7.38
  -8   2  -7   21.64    8.87
   8   2   7   25.30   10.99
   8   2  -7   29.90    7.58
   8  -2  -7   29.24    8.45
  -8  -2  -7   25.10    9.33
   6  -4  -7   94.96   18.37
   6  -4   7   92.68   14.48
  -6  -4   7   95.48   11.05
   6  -4   7  120.51   13.42
   6   4   7  110.10   10.58
   6   4  -7   91.49   13.86
  -6   4  -7   90.75   16.60
   6   4  -7  131.17   13.94
  -6   4   7  122.91   12.00
  -6  -4  -7   90.83   13.26
  -6  -4  -7   96.60   13.42
   6   4   7  102.39   11.40
  -6   4   7  106.81   11.64
   6  -4  -7  115.86   13.87
  -6   4  -7  107.38   17.71
  13   4  -2   41.51    3.71
 -13   4   2   39.81    7.04
  13   4  -2   32.80    8.94
  13  -4  -2   31.95    3.72
  13   4  -2   30.70    6.92
 -13   4  -2   33.83    5.98
  13  -4   2   45.28   14.43
 -13   4  -2   28.43    8.97
  13  -4  -2   43.81   15.25
  13   4   2   37.42   11.16
 -13  -4  -2   35.69    5.90
  13  -4   2   31.19    6.41
 -13   1   4    4.31    2.99
  13   1  -4    4.12    2.57
  13  -1  -4    4.68    4.20
 -13   1  -4    1.59    1.30
 -13  -1   4    3.86    2.15
  13   1  -4    3.14    2.26
 -13  -1  -4    8.11    3.43
  13  -1   4   10.59    5.89
  13  -1  -4   -0.41    2.80
  13   1   4    9.76    5.60
  13  -1   4    9.88    4.71
  13   1   4    2.00    2.56
  13   1  -4    2.49    1.11
 -13   1  -4    3.54    3.49
   3   3   8    4.41    3.84
   3   3   8    2.68    2.33
   3  -3  -8    3.87    3.80
  -3  -3   8    4.65    3.45
  -3   3  -8    2.35    2.31
   3   3  -8    2.62    2.24
   3  -3   8    5.62    5.23
   3  -3   8    3.20    1.92
  -3  -3  -8    3.39    3.62
  -3  -3  -8    1.25    1.27
   3   3  -8    3.06    2.55
   3  -3  -8    0.13    2.18
  -3   3   8    5.71    2.11
  -3   3  -8    1.95    2.69
   4   5  -7   16.94    7.40
   4   5   7    2.96    3.82
  -4   5   7   13.22    5.98
  -4   5   7    9.62    2.95
   4   5   7    3.78    3.59
   4  -5   7    1.25    1.69
  -4  -5   7    4.19    3.90
   4  -5  -7    7.26    4.86
  -4  -5  -7    9.84    4.91
  -4  -5  -7    2.14    2.16
  -4   5  -7    2.67    4.08
   4  -5  -7    9.04    4.64
   4   5  -7    1.33    2.53
  -4   5  -7    2.93    3.62
   4  -5   7    4.06    2.40
 -14   3   1   30.12    5.62
 -14  -3  -1   37.17    7.37
 -14   3  -1   33.06    5.30
 -14   3  -1   27.09    3.56
  14   3  -1   26.20    5.56
 -14  -3   1   37.75    7.19
  14  -3   1   34.49    9.37
 -14  -3   1   38.64    7.03
  14  -3  -1   34.46    4.15
  14   3   1   44.43    7.14
  14   3   1   12.29    3.38
  14   3  -1   33.38   10.74
  14  -3   1   49.49   15.01
 -14   3   1   37.60    6.72
  12   1  -5    3.00    3.26
 -12  -1   5    4.39    4.11
  12  -1  -5    1.49    1.60
  12  -1   5    3.73    4.27
 -12  -1   5    1.56    1.04
  12   1   5   11.88    6.44
 -12   1  -5    1.41    1.64
 -12   1   5    4.16    3.05
 -12   1  -5   -0.02    2.95
 -12  -1  -5    3.38    2.98
  12   1  -5    3.69    2.16
  12   1   5    0.45    2.91
  12  -1  -5    1.12    3.20
  12  -1   5   -1.01    3.67
  -2   9   3    2.27    1.95
   2   9  -3    1.91    1.18
   2   9   3    2.15    3.12
   2   9  -3    3.65    3.68
   2  -9   3    1.92    2.12
  -2  -9   3    2.35    1.87
   2  -9  -3    1.80    1.80
   2  -9   3    5.90    4.21
  -2  -9  -3    5.42    3.33
  -2   9  -3    4.18    2.22
  -2   9  -3    4.50    2.55
  -2  -9   3    1.39    1.42
   2   9   3    1.53    2.39
  -2  -9  -3    2.67    0.95
   2  -9  -3    1.03    1.97
   0  -7  -6    1.28    1.79
   0   7  -6   -0.26    1.44
   0  -7   6    0.93    1.55
   0   7   6    1.36    1.95
   0  -7  -6    0.94    1.34
   0  -7   6    1.46    1.05
   0   7  -6    8.50    2.72
   0   7   6    3.74    2.69
  -1  -7  -6    7.36    3.45
   1   7   6    3.19    1.80
  -1   7  -6    1.99    2.60
  -1  -7   6    2.06    1.21
  -1   7   6   -0.22    2.41
  -1   7  -6    1.95    1.62
   1   7   6    3.23    1.97
   1  -7  -6    0.55    1.77
  -1   7   6    5.79    4.79
   1   7  -6    2.30    2.76
   1  -7   6   -0.25    1.83
   1   7  -6    0.00    1.38
  -1  -7  -6    0.87    1.80
   1  -7  -6    1.56    2.00
   1  -7   6    1.84    1.29
  -8  -6   5    1.38    1.57
  -8   6   5    1.78    0.87
   8   6  -5    6.93    4.72
  -8  -6  -5    0.51    1.55
  -8   6  -5    1.38    2.69
   8   6   5    2.54    2.05
  -8   6   5   -0.25    2.70
   8  -6   5   55.02   10.71
  -8   6  -5    6.50    3.23
  -8  -6   5    5.38    2.82
   8  -6   5    1.64    2.34
   8  -6  -5    1.74    2.92
   8   6  -5    0.76    1.26
   8  -6  -5   17.12   13.02
   5   8   4   32.11   10.51
  -5   8  -4   28.38    7.11
  -5  -8   4   55.38   10.20
  -5   8  -4   32.79   10.68
   5   8  -4   79.88   20.61
   5  -8  -4   67.91   12.51
   5   8  -4   32.89    5.47
  -5  -8  -4   26.08    5.49
  -5   8   4   73.04   15.95
  -5   8   4   63.14   11.33
   5  -8   4   36.82    6.75
  -5  -8   4   38.18    8.48
   5   8   4   33.72    9.69
  -5  -8  -4   32.76    9.61
   5  -8   4   47.84   14.24
   9   7  -3  362.96   18.93
   9  -7  -3  363.94   18.46
   9  -7  -3  401.82   22.59
  -9  -7  -3  419.19   28.68
   9   7   3  358.34   18.80
   9  -7   3  395.14   22.63
  -9   7  -3  387.17   20.21
   9   7  -3  351.49   20.00
  -9   7  -3  386.66   20.37
   9   7  -3  429.58   21.54
  -9   7   3  442.14   23.93
   9  -7   3  381.01   23.32
  -9  -7   3  370.61   19.14
  14   0   3   -1.21    3.09
 -14   0   3    1.14    1.31
  14   0  -3    1.66    1.58
  14   0  -3    0.84    1.27
 -14   0  -3    2.17    3.23
  14   0  -3    0.26    0.25
  14   0   3    1.14    2.77
  -5  -2  -8    5.77    2.87
   5   2   8    2.63    2.86
   5   2  -8    5.07    3.49
   5  -2  -8    5.04    2.04
  -5   2   8    7.08    4.58
   5   2   8    5.03    3.41
  -5   2  -8    2.51    3.08
  -5   2  -8    2.68    3.36
   5  -2   8    5.65    5.50
   5  -2  -8    8.05    3.86
  -5  -2   8    9.60    2.89
   5  -2   8    2.18    1.65
  -5  -2  -8    4.77    3.72
   5   2  -8   -0.19    3.91
  -5   2   8    2.65    2.05
   0   8   5    0.34    2.14
   0   8  -5    5.97    3.09
   0   8   5    1.67    2.21
   0  -8   5    1.09    1.24
   0  -8  -5    1.99    1.48
   0  -8   5    4.69    2.14
   6  -7  -5   12.34    3.74
  -6  -7   5    9.32    5.16
   6   7   5    4.06    1.85
  -6   7  -5    6.65    2.95
   6  -7   5    9.28    5.21
   6   7   5    3.23    2.77
   6   7  -5    8.46    7.59
   6  -7  -5    4.78    4.47
  -6   7  -5    5.51    3.37
  -6  -7   5    6.60    2.14
   6   7  -5    7.23    2.95
   6  -7   5   18.42    4.26
  -6  -7  -5    7.56    2.51
  -6   7   5    9.16    4.63
  -6   7   5    6.56    2.06
   9  -4   6   59.91   11.41
   9   4  -6   63.49    8.23
  -9  -4  -6   61.00   12.45
   9   4  -6   60.05   13.35
   9  -4  -6   67.06   11.55
   9   4   6   64.86    9.50
   9  -4   6   75.45   12.68
   9   4   6   55.59    9.49
  -9  -4   6   60.03    7.04
  -9  -4  -6   63.09    9.41
  -9   4   6   61.79   10.22
  -9   4  -6   55.55   13.71
   9  -4  -6   61.00    7.95
   9   4  -6   71.06   20.40
  -9   4  -6   66.61   14.07
  -1  -8  -5  111.39   10.31
   1   8  -5  116.53   13.68
  -1   8  -5  105.89   12.24
  -1   8   5  118.82   11.13
  -1   8  -5  117.37   13.17
   1   8  -5  117.16   20.74
   1  -8   5  121.81   11.25
  -1  -8   5  114.90   12.16
   1  -8   5  126.22   12.23
   1   8   5  125.48   12.30
  -1   8   5  119.73   12.84
   1   8   5  126.33   11.66
  -1  -8   5  117.18   10.26
   1  -8  -5  119.77   10.78
   1  -8  -5  124.79   13.54
  -6   0  -8  766.21   39.82
   6   0  -8  670.96   33.49
  -6   0  -8  691.92   34.63
  -6   0   8  728.21   38.20
   6   0   8  915.66   46.69
  14   1  -3    7.76    3.92
  14  -1   3   11.13    6.98
  14   1   3    8.25    4.73
  14   1  -3    8.23    2.13
 -14  -1   3    7.39    3.07
 -14   1   3    7.50    3.01
 -14  -1  -3    5.22    1.96
 -14   1  -3    9.78    3.93
  14  -1  -3   10.42    4.21
  14   1  -3    9.17    6.63
  14   1   3    8.76    4.16
  14  -1  -3    5.09    4.53
  14  -1  -3    5.48    1.42
  14  -1   3    9.75    7.58
   2   7   6  484.50   24.92
   2  -7   6  492.86   24.57
   2   7  -6  484.80   25.74
  -2   7  -6  432.14   22.80
   2   7  -6  545.18   30.21
  -2   7  -6  484.74   26.70
  -2   7   6  483.12   25.20
   2  -7  -6  534.99   27.28
  -2   7   6  475.17   23.98
   2  -7   6  459.14   25.23
  -2  -7   6  507.44   26.53
  -2  -7   6  511.63   24.84
   2  -7  -6  465.88   26.19
  -2  -7  -6  491.74   25.81
  -2  -7  -6  490.77   26.31
  15   0   0    2.94    3.53
  15   0   0    0.63    1.07
 -15   0   0   -0.19    1.90
   3   9  -3   17.00    5.56
  -3   9  -3   18.90    5.76
   3   9   3   18.12    8.65
   3  -9   3   14.08    4.49
   3   9   3   16.28    7.12
   3   9  -3    8.35    2.90
  -3   9  -3    4.09    2.73
   3  -9  -3   13.13    4.56
  -3  -9  -3   14.75    3.03
   3  -9  -3   16.38    4.72
  -3   9   3   13.58    5.92
   3  -9   3   14.27    7.32
  -3  -9   3   17.36    5.28
  -3  -9  -3   12.48    5.02
  -3   9   3   21.85    6.38
  -9   0   7  724.77   36.25
   9   0   7  860.25   44.28
   9   0  -7  750.12   37.72
   9   0  -7  790.46   40.47
  -9   0  -7  800.50   41.27
   9   0   7  837.49   42.59
  -9   0   7  816.65   41.12
  -7  -8  -3    8.14    2.90
  -7  -8  -3   13.55    4.03
   7   8   3   12.27    5.37
  -7  -8   3   10.34    5.68
   7  -8  -3   14.67    7.03
  -7   8  -3   11.67    4.47
  -7   8   3   15.32    4.74
   7   8  -3   11.96    5.34
  -7   8   3   18.19    7.13
   7  -8   3   12.61    8.16
   7   8   3   13.81    3.66
   7  -8   3   12.75    8.18
   7  -8  -3   12.25    4.68
   7   8  -3   10.80    2.57
   7   8  -3   16.30    6.55
  -7   8  -3   13.54    5.46
  13   2  -4    1.04    1.46
  13   2   4    3.18    3.40
 -13  -2  -4   -2.33    2.48
 -13   2  -4   -0.53    2.44
 -13   2  -4    1.77    1.38
  13  -2   4    0.80    2.82
  13  -2  -4   -0.08    2.60
  13  -2   4    4.89    4.10
 -13  -2   4   -0.45    1.83
 -13   2   4   -0.23    1.96
  13   2  -4    3.89    3.24
  13   2   4    4.67    3.58
  13   2  -4    4.14    1.97
   8  -8  -2  312.73   16.06
  -8   8  -2  327.03   18.62
  -8  -8  -2  314.71   17.24
   8   8   2  370.97   26.31
   8   8  -2  354.96   20.31
  -8   8   2  432.97   24.07
   8  -8  -2  441.17   23.53
  -8  -8   2  334.90   18.68
   8   8  -2  295.42   17.37
  -8   8  -2  318.22   17.62
   8   8   2  310.44   16.53
  -6   9   0   45.53    7.14
   6   9   0   34.90    7.69
  -6   9   0   44.26    6.47
   6  -9   0   34.85    5.56
  -6  -9   0   44.36    8.46
   6  -9   0   45.20    4.28
   6   9   0   43.56    5.02
   4  -3   8    3.20    4.10
  -4   3  -8    2.74    2.35
   4  -3  -8    1.25    2.06
   4   3   8   -1.41    2.38
   4   3   8    1.80    1.98
  -4   3   8   -0.43    2.64
   4  -3  -8    4.92    3.01
   4  -3   8   -0.06    1.13
   4   3  -8    0.68    2.09
  -4   3  -8    3.15    3.35
   4   3  -8    4.64    3.20
  -4  -3   8    4.25    3.93
  -4   3   8    2.29    1.78
  -4  -3  -8    4.70    2.71
  -4  -3  -8    0.16    1.51
  -8  -7   4  115.91   11.97
   8  -7  -4  137.01   13.31
   8  -7  -4  118.93   12.00
   8  -7   4  124.90   12.04
  -8  -7  -4  117.16   11.56
  -8   7  -4  114.26   13.50
  -8  -7  -4  125.34   12.18
   8   7   4  127.16   13.14
   8   7  -4  156.00   20.19
   8   7  -4  122.00   11.65
  -8   7  -4  133.41   16.30
  -8   7   4  153.55   17.39
   8  -7   4  125.46   12.72
  -8   7   4  121.21   11.58
   8   7  -4  151.43   15.69
   8   7   4  122.36   10.89
   0   4  -8  126.49   19.31
   0  -4  -8  143.08   13.73
   0   4  -8  152.70   18.88
   0  -4  -8  155.41   20.09
   0  -4   8  137.30   15.12
   0   4   8  149.10   13.37
   0   4   8  140.67   13.01
  -6  -6  -6    7.51    3.62
  -6  -6   6    6.07    1.46
  -6   6   6    4.90    2.60
  -6   6   6   16.37    7.66
   6   6   6    3.20    1.48
  -6   6  -6    5.00    3.12
   6  -6  -6    2.84    2.42
   6   6  -6   25.54    7.59
   6  -6  -6   10.49    3.39
   6   6   6   -2.37    3.12
  -6  -6  -6    4.18    2.30
  -6   6  -6   10.73    3.61
   6  -6   6    7.39    3.56
  -6  -6   6   17.63    5.66
   6   6  -6   10.30    3.52
  -5   9   2    4.68    3.08
   5   9   2    3.80    2.05
   5  -9   2    1.90    2.12
   5  -9  -2    1.05    1.75
  -5   9  -2    3.80    3.53
  -5  -9   2    1.32    1.48
  -5   9  -2    1.51    1.37
   5   9  -2    1.64    2.74
   5  -9   2    1.67    2.04
   5   9   2    2.56    2.50
  -5   9   2    1.14    1.87
  -5  -9  -2    0.86    1.66
 -10   7   2  762.80   39.02
  10  -7   2  736.97   37.36
 -10   7  -2  760.91   37.87
  10   7  -2  658.23   34.32
  10   7   2  791.29   41.11
 -10   7  -2  703.46   34.95
  10  -7   2  759.28   38.12
 -10  -7  -2  682.60   33.54
  10   7  -2  738.52   35.96
  10   7   2  720.33   36.01
  10  -7  -2  782.74   38.70
  10  -7  -2  775.92   39.69
 -10  -7   2  764.21   38.09
 -10  -7  -2  706.54   35.80
  10   7  -2  731.66   37.16
  11  -5  -4    7.40    4.90
 -11  -5  -4    3.63    2.43
  11  -5  -4    0.78    0.93
 -11   5  -4    2.14    1.89
  11   5   4    1.60    1.52
 -11   5   4    2.28    2.10
  11   5  -4    5.91    5.04
 -11   5  -4   -1.06    3.19
 -11  -5  -4    4.56    3.20
  11   5  -4    0.96    1.29
  11   5  -4    0.13    2.55
  11  -5   4    1.19    2.79
  11  -5   4    1.46    2.40
  11   5   4   -1.12    3.17
  11   5  -4    0.94    1.24
  -6  -1   8   62.04   19.04
   6   1   8   28.28    9.82
  -6   1  -8   34.55   11.72
  -6   1   8   60.91   16.24
  -6  -1   8   36.95   17.14
   6   1   8   36.36   18.49
   6   1  -8   43.72    3.98
   6  -1  -8   36.88    9.59
  -6   1  -8   37.07   10.87
  -6  -1  -8   49.67    9.34
  -6  -1  -8   43.26   11.93
   6   1  -8   51.30   11.62
   6  -1  -8   36.28    7.75
   6  -1   8   29.76    9.12
  -6   1   8   34.38    9.51
   6  -1   8   46.36   25.66
  12  -2   5    2.54    2.64
 -12  -2  -5    2.43    2.95
  12   2  -5    0.18    2.19
  12   2   5    1.76    2.47
  12  -2  -5    1.31    2.44
  12   2  -5   -1.13    2.03
 -12  -2   5    7.23    3.64
 -12   2  -5   -0.78    2.42
 -12   2   5   -0.58    2.10
 -12   2  -5    1.91    1.75
  12  -2   5    1.43    3.16
  12   2   5    1.05    3.68
  12  -2  -5    1.21    2.73
  11   0   6    1.27    3.01
 -11   0   6    2.25    1.51
 -11   0  -6   -0.06    3.73
  11   0   6    0.83    2.03
  11   0  -6    2.37    2.71
 -11   0   6    2.55    2.16
  11   0  -6    2.35    3.50
  -1  -4  -8   30.22    6.58
   1   4  -8   33.56   12.25
  -1  -4  -8   32.05   11.55
  -1   4  -8   20.38    5.59
   1   4   8   37.46    9.24
  -1   4   8   27.59    5.02
   1  -4  -8   30.60    6.91
  -1   4  -8   27.10    8.88
   1   4   8   27.62    6.47
  -1   4   8   35.34    5.65
   1  -4  -8   33.58   10.97
   1   4  -8   28.82    5.94
  -1  -4   8   16.11    7.33
 -10   3   6    8.72    3.81
  10  -3  -6    7.42    3.52
  10  -3  -6    5.92    2.94
  10  -3   6    7.37    2.83
  10   3  -6    6.17    5.84
  10   3   6    5.71    2.92
 -10  -3   6    7.60    3.91
  10   3  -6    1.46    1.76
 -10   3  -6   33.79    7.32
 -10   3  -6   37.52    7.86
  10   3  -6    8.02    3.71
  10  -3   6    9.58    6.29
 -10  -3  -6    8.76    5.33
  10   3   6    5.99    3.08
  15   1   0   -0.38    1.95
  15   1   0   -2.20    3.65
 -15   1   0   -0.07    0.74
 -15  -1   0   -0.01    1.75
 -15   1   0    0.46    2.51
  15  -1   0    1.53    1.57
  13  -5   0    2.44    1.31
 -13   5   0   -0.45    1.36
  13   5   0   -1.19    2.25
  13  -5   0    4.01    2.69
  13   5   0    3.74    4.23
  13   5   0    2.36    1.30
 -13  -5   0    1.00    1.40
 -13   5   0   -0.13    2.14
   2  -8   5   21.94    6.20
  -2  -8   5   21.32    4.95
  -2   8  -5   21.51   12.38
   2   8  -5   25.07    6.94
  -2   8  -5   20.09    7.31
   2  -8  -5   29.13    9.46
   2   8   5   23.87    4.88
   2   8   5   21.06    7.43
   2  -8   5   19.24   10.24
   2  -8  -5   21.22    4.33
  -2   8   5   24.72    7.80
  -2   8   5   22.58    9.51
  -2  -8   5   29.38    9.55
   2   8  -5   18.22    8.46
  -2  -8  -5   25.59    7.17
   9  -1   7   62.98   11.24
  -9  -1   7  130.11   18.64
  -9   1   7  136.20   19.58
  -9   1  -7   51.80   10.71
  -9   1  -7   71.76   19.14
  -9  -1  -7   63.04    9.99
  -9  -1   7  116.18   11.12
   9   1  -7  110.05   12.16
  -9   1   7  127.03   14.64
   9   1  -7  112.21   11.39
   9  -1  -7   99.74   11.28
   9   1   7   71.11   19.88
   9  -1   7   56.46   14.87
   9   1   7   32.72   10.62
   9   1   7   74.03   12.04
  15   0   1  395.25   21.03
 -15   0  -1  333.68   17.87
 -15   0   1  335.83   17.43
 -15   0   1  330.02   18.54
  15   0  -1  305.69   18.77
   5  -5  -7   17.45    7.17
  -5  -5  -7   17.21    6.07
  -5  -5  -7   13.58    6.13
  -5   5   7   22.79    6.34
   5  -5   7   11.20    7.66
  -5   5  -7   21.88    7.70
  -5   5  -7   19.13    7.45
  -5   5   7   21.44    8.08
   5   5   7   23.25    8.64
   5   5  -7   16.24    6.61
   5  -5   7   17.68    5.61
   5   5   7   13.35    4.50
   5   5  -7   21.43    7.66
   5  -5  -7   12.82    6.24
  -5  -5   7   15.26    5.33
  12   6   0  413.45   22.29
 -12   6   0  492.63   25.19
 -12   6   0  474.85   24.32
  12   6   0  490.43   27.09
 -12  -6   0  440.42   22.55
  12  -6   0  470.45   25.75
  12   6   0  459.92   23.57
  12  -6   0  429.04   22.96
 -12   4  -4   30.72    8.17
 -12   4   4   39.41   11.75
  12   4  -4   29.12    6.83
  12   4   4   36.78    8.04
  12  -4   4   33.42   11.59
  12   4   4   30.15    8.78
  12   4  -4   27.30    5.51
  12   4  -4   24.96   10.36
  12  -4   4   28.50    7.27
  12  -4  -4   24.85    9.32
 -12  -4  -4   33.25    9.97
  12  -4  -4   33.96   11.58
  12   4  -4   44.31    9.48
   8  -5   6   37.08   11.35
  -8  -5  -6   37.20    5.55
  -8   5   6   52.02   16.02
  -8  -5   6   41.66    9.18
   8  -5  -6   33.09    9.60
   8   5  -6   42.75    4.57
   8  -5  -6   40.04    8.81
  -8   5  -6   37.36   10.06
   8   5  -6   45.42   14.84
   8   5  -6   43.42   10.09
   8  -5   6   39.50   10.23
  -8   5  -6   37.85   13.15
  -8  -5  -6   50.11   13.70
  -8   5   6   34.67    4.19
  -6  -9   1    2.55    2.69
  -6   9  -1    4.98    3.40
   6   9   1    4.94    4.61
   6  -9  -1    3.03    1.18
   6  -9   1    4.18    3.26
  -6   9   1    4.70    2.28
  -6   9  -1    2.03    2.40
  -6  -9  -1    5.14    2.35
   6   9   1    2.58    1.81
   6  -9   1    3.81    2.39
  -6   9   1    2.13    1.55
   6  -9  -1    3.07    2.61
   6   9  -1    9.72    3.85
   0  -6  -7    2.16    2.02
   0   6   7    1.94    4.37
   0   6   7   -0.88    2.61
   0   6  -7    2.31    2.11
   0   6  -7    3.65    3.50
   0  -6  -7   -0.31    1.85
   0  -6   7    3.07    1.87
 -14   3   2    4.63    1.60
  14   3  -2    5.02    2.65
  14  -3   2    1.80    4.77
  14  -3  -2    5.01    3.88
 -14   3  -2    3.84    2.28
  14   3   2    1.67    2.47
  14  -3  -2    3.45    1.06
 -14  -3   2    3.17    2.27
  14  -3   2    4.19    2.31
 -14   3  -2    2.97    2.17
  14   3  -2    7.45    2.98
 -14  -3  -2    4.64    2.08
  12   5  -3   18.52    7.42
  12   5  -3   15.62    4.69
  12  -5  -3   18.92    6.48
  12   5  -3   14.08    8.44
  12   5   3   20.87    8.58
  12   5   3    6.05    4.05
  12   5   3   13.08    3.25
  12  -5  -3   21.34    6.13
  12  -5   3   22.90    8.63
  12  -5   3   18.98    7.23
  12  -5  -3   13.86    3.79
 -12   5  -3   12.00    3.24
  12   5  -3   34.68   11.26
 -12   5  -3   12.32    5.59
 -12  -5  -3   19.98    6.39
 -12   5   3   19.49    4.93
  11   1  -6   34.45    7.68
 -11  -1  -6   34.63   11.62
  11   1  -6   28.78    5.76
  11  -1   6   35.99   11.74
  11  -1   6   35.74   14.17
  11   1   6   27.28    9.56
  11   1   6   41.58   14.64
 -11  -1   6   27.93    5.20
 -11   1  -6   36.46   12.02
 -11  -1   6   33.12   10.31
 -11   1  -6   24.01    7.26
  11   1   6   17.67    4.86
  11  -1  -6   33.39    7.40
  -8  -3   7   33.52    7.89
   8   3   7   31.15    4.87
   8   3  -7   37.93   10.19
   8  -3   7   36.79    7.92
   8  -3  -7   37.48    7.15
  -8  -3  -7   30.56    5.98
   8   3   7   41.81    8.29
  -8   3   7   40.73   12.65
  -8   3  -7   30.02    8.50
  -8   3   7   29.17    4.15
   8   3  -7   35.81   11.08
  -8  -3  -7   42.35   10.56
   8  -3  -7   37.70    6.39
   8  -3   7   32.15   14.09
   8   3  -7   26.52    4.47
   1   6  -7   69.61   10.02
  -1   6   7   84.86    9.86
   1   6   7   65.39    9.59
  -1   6  -7   59.01    9.05
   1   6   7   90.97   10.43
   1  -6  -7   69.97    8.96
   1  -6  -7   77.82    9.96
  -1  -6   7   64.68    8.19
  -1  -6  -7   67.24    9.98
   1  -6   7   68.58   10.45
   1   6  -7   91.51   14.07
  -1  -6  -7   95.25   15.27
   1  -6   7   66.89    7.17
  -1   6   7   83.84    9.63
  -1   6  -7   76.44   18.54
  -3   7  -6    1.70    3.87
  -3   7   6   -0.02    0.80
   3  -7  -6    1.24    2.29
  -3  -7  -6    0.97    2.14
   3   7  -6    2.64    2.25
   3   7   6   -0.40    2.63
  -3   7  -6    4.00    2.99
   3   7   6   -1.94    3.42
   3  -7   6    2.81    1.38
   3  -7   6    2.16    3.04
   3  -7  -6    1.24    2.09
  -3  -7  -6    0.57    2.14
   2   4   8   12.67    5.01
  -2  -4  -8   10.20    4.32
  -2   4   8    5.57    2.58
   2   4   8   10.65    5.25
   2  -4   8    5.30    4.28
  -2  -4   8    5.70    3.70
   2  -4   8    6.03    2.03
   2  -4  -8    8.70    2.96
   2  -4  -8    2.91    3.47
   2   4  -8    4.34    1.76
  -2   4  -8    8.30    4.39
   2   4  -8    8.43    3.74
  -2   4   8    9.23    4.66
  -2  -4  -8    5.67    3.75
  -2   4  -8    3.02    2.67
 -15  -1   1  124.56   11.37
 -15   1   1  126.59   11.66
 -15  -1  -1  129.80   14.35
 -15   1  -1  131.38   14.32
  15   1  -1   84.99   10.12
 -15  -1   1  123.64   11.36
 -15   1   1  124.67   11.56
  15  -1   1  134.46   13.99
  15  -1  -1  118.58   12.17
  15   1  -1  128.77   13.13
  15  -1   1  140.00   13.17
  15  -1  -1  125.19   12.34
  15   1   1  153.91   13.71
  13  -5  -1   50.40    9.02
  13  -5   1   62.51    8.00
  13  -5   1   47.30    7.72
 -13  -5   1   54.49    7.93
  13   5   1   51.17    7.75
  13   5  -1   60.13   13.80
 -13   5   1   54.14    9.90
  13   5  -1   45.21    7.10
  13   5   1   44.26    6.40
 -13   5  -1   53.11    9.05
 -13   5   1   64.55   12.02
  13   5   1   57.08    7.45
  13   5  -1   58.06    7.53
 -13   5  -1   60.73   13.18
  13  -5  -1   46.24    6.65
  -9   8   0    1.26    1.35
  -9  -8   0    1.86    1.47
   9   8   0    1.94    1.52
   9   8   0    3.16    2.78
   9  -8   0    1.90    1.98
   9  -8   0    2.89    2.29
  -9   8   0    0.66    0.92
  -7   4   7   22.94    5.26
  -7   4  -7   19.80    8.13
   7   4   7   15.34    7.25
   7  -4  -7   14.66    4.30
  -7  -4  -7   18.56    6.96
   7  -4  -7   18.60    5.21
   7   4  -7   15.92    5.70
  -7  -4  -7   23.29    7.10
  -7   4  -7   20.32    9.55
   7   4   7    7.95    5.35
  -7   4   7    9.45    4.50
   7  -4   7   15.19    6.93
   7   4  -7   22.28    7.77
  -7  -4   7    5.98    4.48
   7  -4   7   14.70    5.91
  12   6  -1    1.59    2.96
 -12  -6  -1    1.20    1.18
  12  -6   1   -1.16    2.11
 -12   6   1    2.85    1.70
  12   6   1    1.69    1.71
  12   6  -1    3.60    3.72
  12   6  -1    2.36    2.43
  12  -6  -1    0.36    1.27
 -12   6   1    2.72    2.93
  12  -6  -1    2.36    1.92
 -12   6  -1    2.20    1.76
 -12   6  -1   -0.24    2.03
  12   6   1    0.69    1.26
 -12  -6   1   -0.77    0.84
  12  -6   1    2.21    2.26
  10  -6  -4  123.38   10.83
 -10   6  -4  132.61   14.84
  10   6  -4  132.77   13.48
 -10  -6  -4  126.63   15.08
 -10  -6  -4  113.64   12.93
  10  -6   4  139.54   12.72
  10  -6   4  110.80   11.53
  10   6  -4  132.12   14.04
  10  -6  -4  184.30   18.37
 -10   6   4  168.13   15.20
  10  -6  -4  210.61   21.79
  10   6   4  110.99   10.60
 -10   6  -4  117.58   12.64
 -11  -6  -3   60.47    7.00
  11  -6  -3   59.72    8.68
 -11  -6  -3   68.35    8.20
 -11   6   3   74.98   12.09
 -11   6  -3   63.92    9.49
  11  -6  -3   56.81    6.88
  11   6  -3   78.78   12.74
  11   6  -3   56.48    9.53
 -11   6  -3   64.02    9.52
  11   6  -3   60.71    8.84
  11  -6   3   58.70    8.15
  11  -6  -3   61.69   13.39
  11   6   3   67.49    8.32
  11  -6   3   63.74    9.45
  11   6  -3   68.87    9.64
  14  -2   3    3.34    3.19
 -14   2  -3    4.33    2.03
  14   2   3    5.68    3.19
  14   2  -3    4.54    3.98
  14   2  -3    3.85    2.42
 -14  -2   3    3.38    2.27
 -14   2   3    1.37    1.16
 -14  -2  -3    7.31    2.58
  14   2   3   -0.19    4.88
 -14   2  -3    8.31    3.12
  14   2  -3    5.00    3.66
  14  -2   3    3.30    3.58
  14  -2  -3    6.30    4.34
  11   4  -5   27.35   22.58
 -11   4   5   35.29    9.44
  11  -4   5   35.72   13.73
  11   4  -5   35.96    5.66
  11  -4   5   38.13   16.60
  11   4  -5   30.82    4.94
  11  -4  -5   27.25    4.93
 -11  -4  -5   33.65   11.16
  11  -4  -5   30.95    7.69
 -11   4  -5   36.05   11.66
  10  -5   5    1.11    1.76
 -10   5  -5    5.73    3.11
  10   5   5   -2.21    3.36
 -10   5  -5    3.30    2.44
  10  -5   5    1.85    1.42
  10  -5  -5    5.18    4.23
  10   5  -5    3.18    3.80
  10   5  -5    1.81    1.72
  10   5  -5    0.10    2.63
 -10   5   5    3.81    2.59
  10  -5  -5    0.16    1.38
  10   5   5    1.42    1.28
   4  -9   3    1.50    2.64
  -4   9   3    0.71    1.34
  -4   9  -3    6.41    2.89
   4   9  -3    7.01    2.49
  -4  -9   3    6.87    3.09
   4  -9  -3    3.60    3.50
   4   9   3    3.49    2.05
  -4   9  -3    2.48    1.28
   4   9  -3    1.92    1.39
   4  -9   3    2.02    1.70
  -4  -9  -3    7.11    3.34
  -4  -9  -3    4.28    1.14
   4  -9  -3    4.13    2.36
   4   9   3    1.61    2.76
  -4   9   3   10.02    3.11
  -3   8   5    5.99    2.38
   3   8   5    3.06    2.10
   3  -8  -5    7.76    5.36
  -3  -8   5    4.56    1.89
  -3  -8  -5    5.03    2.25
   3   8   5    5.61    2.65
   3  -8   5    2.62    1.76
   3   8  -5    5.52    5.32
   3  -8   5    7.79    3.75
   3  -8  -5   10.26    3.95
  -3  -8  -5    2.82    2.15
  -3  -8   5    6.51    3.69
  -3   8  -5    6.54    3.00
   3   8  -5    7.21    2.84
   2  -6  -7    2.06    1.95
   2   6  -7    1.22    4.45
  -2  -6  -7    0.32    1.57
  -2   6  -7    0.98    1.90
  -2   6   7    1.29    2.12
  -2  -6  -7   -0.04    2.26
  -2  -6   7    2.14    1.62
   2  -6   7    1.32    3.61
   2   6   7    1.07    1.59
   2   6   7   -1.79    2.12
   2  -6  -7    3.26    2.65
  -2   6   7    0.21    1.85
  -2   6  -7   -0.69    2.71
   2   6  -7   -0.09    1.70
 -13   4  -3   16.64    6.90
  13  -4  -3   32.31   12.37
  13  -4   3   26.22   11.37
  13   4  -3   24.74    6.09
 -13   4  -3   30.91    5.68
  13   4   3   16.88    7.37
 -13  -4  -3   33.09   10.35
  13   4  -3   20.39    8.25
  13  -4  -3   25.17    6.92
 -13   4   3   16.22    6.18
  13  -4   3   34.37   13.08
  13   4  -3   28.58   10.23
  13   4  -3   27.84    4.59
  13   4   3   28.45    8.19
  -6   8   4  713.82   35.92
  -6   8   4  807.40   40.38
   6   8  -4  655.94   32.09
   6  -8   4  656.45   32.77
   6   8   4  923.89   45.72
  -6  -8  -4  682.62   33.52
  -6  -8  -4  723.53   37.60
   6  -8   4  671.15   34.66
  -6   8  -4  728.49   36.81
  -6   8  -4  695.79   35.68
   6   8   4  695.62   35.06
   6  -8  -4  706.25   35.99
  -6  -8   4  743.18   36.36
   6   8  -4  788.87   41.11
 -14   4   0    8.85    4.47
  14   4   0   15.27    6.90
  14  -4   0   18.75    7.11
  14   4   0    9.98    4.53
  14   4   0    9.94    3.12
 -14   4   0   18.26    4.81
 -14  -4   0   17.28    4.61
  14  -4   0   15.55    5.53
  -9  -8   1  484.87   25.16
   9  -8   1  475.91   25.22
   9   8   1  477.21   27.26
  -9   8   1  484.08   24.41
  -9   8  -1  476.28   24.35
   9   8  -1  506.75   27.72
   9   8  -1  470.20   24.29
  -9  -8  -1  472.79   25.63
   9   8   1  450.44   23.11
  -9   8  -1  508.29   26.04
   9  -8  -1  458.27   24.01
   9  -8   1  520.54   26.89
  -9   8   1  489.30   25.30
   9  -8  -1  488.62   25.88
   6   2  -8   29.16    3.26
   6   2   8   43.11   16.79
   6  -2   8   40.67   11.38
   6  -2   8   50.15   15.74
  -6  -2   8   32.09   11.85
   6  -2  -8   37.68    9.25
  -6   2  -8   43.85    9.74
   6   2   8   45.75    3.95
   6  -2  -8   38.91   12.97
   6   2  -8   36.16    5.78
  -6  -2  -8   56.67   16.39
  -6   2  -8   47.08    7.28
  -6   2   8   52.66   14.86
  -6  -2  -8   43.41    7.24
  -6   2   8   39.71    8.09
   0  10   0 1250.08   15.19
   0 -10   0 1305.33   16.26
   0  10   0 1353.36   16.77
 -15   2   0    0.66    0.80
  15   2   0    0.67    0.93
  15   2   0   -0.62    3.81
  15  -2   0    2.59    1.87
 -15   2   0    2.25    1.74
 -15  -2   0    1.08    1.46
   5  -3  -8    0.89    1.88
   5  -3   8    0.06    1.04
   5   3  -8    2.10    2.33
   5   3  -8    7.44    3.12
  -5   3   8    0.67    1.06
   5  -3   8   -3.10    4.15
   5  -3  -8    2.87    3.66
  -5  -3   8    1.60    1.62
  -5  -3  -8    1.41    1.58
   5   3   8    4.35    3.12
  -5   3   8    2.50    2.50
  -5   3  -8    2.47    2.39
   5   3   8    2.62    2.77
  -5   3  -8    5.38    5.18
  -5  -3  -8    0.50    2.73
   9  -2  -7  112.07   16.51
   9   2  -7  101.87   11.02
  -9   2  -7  108.74   16.87
   9  -2   7   96.55   18.49
  -9  -2   7  107.78   12.96
   9  -2   7  135.76   24.27
   9  -2  -7  105.48   12.50
   9   2  -7  105.90   17.30
  -9   2  -7  104.68   11.68
   9   2   7  106.57   11.27
  -9   2   7  120.47   16.83
  -9  -2  -7  110.72   14.17
   9   2   7  111.76   13.58
  -3  -4  -8   50.31    9.65
   3   4   8   69.66    8.38
   3   4  -8   51.15    9.43
   3  -4   8   46.50   10.94
  -3   4  -8   64.14   17.90
  -3  -4  -8   61.89    9.50
  -3  -4   8   61.66    8.70
   3  -4   8   55.30    9.48
   3   4  -8   62.57   19.91
  -3   4   8   58.98    9.79
  -3   4  -8   70.59   10.49
   3  -4  -8   69.64   10.05
   3  -4  -8   50.72    7.79
   3   4   8   68.93    8.87
   1  10   0   39.68    7.04
  -1 -10   0   24.71    7.13
   1 -10   0   31.22    8.38
  -1  10   0   32.92    9.27
   1  10   0   33.40   13.85
  11   7   0    6.09    3.06
 -11  -7   0   -1.03    2.79
 -11   7   0   -0.38    2.19
  11  -7   0    0.19    2.58
  11  -7   0    0.45    3.64
 -11   7   0    8.51    6.95
  11   7   0    1.86    2.13
 -14  -4   1   19.67    6.65
  14  -4  -1   14.61    5.16
 -14   4   1   20.11    5.84
  14  -4   1   17.15    6.08
 -14   4   1    8.58    2.72
  14   4  -1   13.27    3.72
 -14   4  -1   14.49    3.96
  14  -4   1   18.01    6.84
  14  -4  -1   14.29    7.96
  14   4   1   23.21    7.18
  14   4  -1   16.27    7.80
 -14  -4  -1   17.29    5.08
 -14   4  -1   12.07    5.10
  14   4   1   -0.04    2.67
  14   4  -1   17.76    5.69
  11   2  -6    3.89    2.13
 -11  -2   6    3.06    3.38
  11  -2   6   -0.77    4.08
 -11   2   6    5.76    3.02
  11   2   6    6.67    4.59
  11   2  -6    5.04    2.49
  11  -2  -6    2.58    2.88
 -11   2  -6    7.75    3.93
 -11  -2  -6    7.68    3.68
 -11  -2   6    5.29    2.00
  11  -2  -6    1.43    1.96
 -11   2  -6    4.25    1.82
  11  -2   6   12.09    4.71
  15   0   2   -1.27    3.17
  15   0   2   -0.39    2.17
  15   0  -2   -0.01    3.13
  15   0  -2   -1.04    1.24
 -15   0  -2    3.37    3.16
 -15   0   2    1.67    1.38
  -4  -7  -6  685.44   35.06
   4  -7  -6  692.53   35.65
  -4   7  -6  695.97   36.18
  -4  -7   6  597.73   29.08
   4   7   6  670.94   33.70
   4   7  -6  658.59   33.16
  -4  -7  -6  546.93   27.65
  -4   7  -6  661.55   37.89
   0  -9  -4    1.10    2.20
   0  -9   4    1.53    1.74
   0   9  -4    0.62    2.07
   0  -9  -4    1.79    1.67
   0   9   4   -1.08    1.99
   0   9  -4    1.34    3.12
   0  -9   4    0.11    2.30
   0   9   4    1.77    2.07
  13   3  -4   59.85   11.61
  13   3  -4   55.97    9.57
  13  -3   4   74.15   14.12
  13  -3  -4   62.95    9.72
 -13   3  -4   56.88    8.20
  13   3  -4   58.51    7.79
 -13  -3  -4   68.59   12.10
  13  -3   4   56.85   13.84
  13   3  -4   68.90   10.12
  13   3   4   72.48   15.31
 -13   3  -4   77.12   14.43
  13  -3  -4   63.90   11.40
  13   3   4   67.79   17.39
 -13   3   4   67.83   11.32
   0 -10  -1   46.41   14.21
   0  10   1   68.86   14.94
   0  10   1   38.09   13.68
   0 -10   1   45.69   14.73
   0  10  -1   80.38   14.68
   0  10   1   38.35    5.35
 -15   2   1   24.18    7.53
 -15  -2  -1   18.64    4.94
  15   2  -1   20.00    7.55
 -15  -2   1   25.54    6.77
  15  -2  -1   25.69    9.56
 -15   2  -1   29.89    7.37
  15  -2   1   22.82    4.66
  15  -2  -1   26.45    2.47
  15   2   1   28.90   11.03
  15   2  -1   17.22    5.71
  15  -2   1   23.52    7.95
 -15  -2   1   22.54    5.50
 -15   2   1   15.75    5.44
 -15   2  -1   15.52    3.19
  15   2   1   23.73   13.74
   7  -7   5  137.84   13.20
  -7  -7  -5  134.74   13.23
  -7   7  -5  140.26   17.92
   7   7   5  186.15   16.96
  -7  -7  -5  133.12   12.91
   7   7  -5  139.34   13.94
   7  -7  -5  183.27   16.62
   7   7  -5  172.23   28.41
  -7  -7   5  136.15   14.69
   7  -7  -5  160.48   15.01
   7  -7   5  158.12   15.40
  -7  -7   5  162.28   15.21
  -7   7   5  165.22   16.11
  -7   7  -5  116.27   14.53
  -7   7   5  208.83   21.91
  -6  -9   2   39.10    5.60
  -6   9   2   51.00   10.43
   6   9  -2   46.13   14.80
  -6   9   2   44.01    7.95
  -6   9  -2   43.06    6.99
   6   9  -2   49.28    8.57
   6   9   2   37.77    4.06
  -6  -9  -2   42.41    5.89
   6  -9   2   39.05    5.01
   6  -9   2   43.07    7.57
   6  -9  -2   34.63    7.60
   6   9   2   40.40    5.26
  -7   0   8   -0.19    1.85
  -7   0   8    0.71    2.09
  -7   0  -8    1.64    1.70
   7   0  -8    3.82    3.19
   7   0   8   -0.70    3.60
   7   0  -8    0.92    1.34
   7   0   8    2.28    2.41
   3  -6   7   16.93    5.45
  -3   6   7   20.28    7.35
  -3  -6  -7   18.74    6.23
  -3  -6  -7   11.98    5.66
   3  -6  -7   14.89    5.91
   3   6  -7   15.26    6.33
   3  -6   7   11.99    4.86
  -3   6  -7   14.71    6.50
   3   6   7   16.56    6.26
  -3   6   7   17.96    3.31
  -3  -6   7   19.39    6.35
   3   6   7   21.98    8.12
   3  -6  -7   16.12    5.37
   3   6  -7   25.47    8.11
  -3   6  -7   13.81    6.05
   1   9   4   21.76    8.66
  -1  -9   4   12.44    2.13
  -1  -9  -4   18.36    5.45
   1  -9  -4   18.53    3.66
   1   9  -4   20.75    9.54
  -1   9   4   21.35    9.76
   1   9  -4   16.46    6.19
   1  -9   4   28.46   10.94
  -1   9   4   25.30    8.89
  -1   9  -4   19.96    8.71
   1   9   4   19.51    4.58
  -1  -9  -4   21.32    9.64
  -1   9  -4   14.60    3.92
   1  -9  -4   22.00   10.67
  -1  -9   4   15.78    4.86
   1  -9   4   16.57    3.47
   1  10  -1  133.77   13.87
   1 -10  -1  142.51   20.30
  -1  10   1  136.55   12.97
   1  10  -1   95.17    9.98
   1  10  -1  142.63   13.53
   1  10   1  160.19   19.51
   1 -10   1  150.82   15.50
  -1 -10  -1  176.44   16.78
  -1 -10   1  142.51   15.14
  -1  10  -1  166.10   20.46
   1  10   1  146.66   16.21
   2 -10   0  111.35   15.22
   2  10   0  151.73   14.86
  -2  10   0  148.33   18.81
  -2  10   0   76.58    8.78
  -2  10   0  126.42   14.15
   2  10   0  115.48   15.88
  -2 -10   0   96.11   15.89
 -11   7   1  264.55   14.76
  11   7  -1  244.45   14.48
  11  -7   1  292.54   23.07
  11   7   1  251.06   14.09
  11   7   1  294.99   21.48
  11  -7   1  250.79   15.99
  11  -7  -1  293.63   17.17
 -11   7  -1  276.76   14.98
  11  -7  -1  292.16   20.16
 -11   7   1  265.38   16.89
 -11  -7   1  257.53   16.15
 -11  -7  -1  304.49   17.53
  11   7  -1  286.53   18.91
 -11  -7  -1  288.76   15.13
 -11   7  -1  289.66   15.96
   7  -9   0    2.31    2.75
  -7  -9   0    1.27    1.33
   7  -9   0    1.34    1.80
  -7   9   0    3.49    2.42
   7   9   0    8.25    4.19
  -7   9   0    0.80    1.38
   7   9   0    3.39    2.60
  12   3  -5    4.47    2.34
  12   3  -5    5.72    2.41
  12  -3  -5    4.95    3.22
  12   3   5    8.18    4.43
  12   3   5    2.84    3.94
 -12   3   5    5.80    3.04
 -12   3  -5    3.42    2.75
  12  -3   5    3.56    3.58
  12  -3  -5    6.04    2.24
  12  -3   5    5.15    3.84
  12   3  -5    2.04    1.37
 -12   3  -5   -0.41    2.87
 -12  -3  -5    5.98    3.53
   0   0  -9    0.20    0.81
   0   0   9   -1.50    3.36
   0   0  -9    1.54    1.82
   0   0   9   -1.77    5.94
   6  -5  -7    2.07    3.55
   6   5  -7    7.58    4.74
  -6   5  -7    2.22    3.15
   6   5   7    0.49    1.80
  -6   5   7    5.00    3.16
  -6   5  -7   -0.30    2.45
  -6  -5  -7    6.40    2.86
   6  -5  -7    5.23    3.05
   6  -5   7    0.23    1.21
  -6  -5   7    2.12    1.76
  -6  -5  -7    1.29    1.67
   6   5   7    2.25    2.42
   6  -5   7    1.26    3.88
   6   5  -7    2.69    2.67
  -6   5   7   -0.17    2.52
  -9   6   5   17.28    4.26
  -9   6   5   24.07   11.88
   9  -6   5   66.64   17.93
   9   6   5   62.10   14.41
   9  -6  -5   27.82   10.16
  -9  -6   5   13.51    8.49
   9   6  -5   29.80   17.21
  -9  -6  -5    4.11    9.39
   9  -6   5   20.27    9.35
  -9  -6   5   20.26    6.72
  -9   6  -5   18.91    7.01
   9   6  -5   13.75   11.29
   9  -6  -5   33.55    8.74
 -15   1  -2    1.27    1.66
  15  -1   2    3.12    3.60
  15  -1  -2    0.94    1.85
  15  -1   2    4.54    4.03
  15   1  -2    2.35    1.34
  15  -1  -2    0.96    0.96
 -15  -1  -2    0.93    1.96
  15   1  -2    3.42    3.27
 -15   1   2    2.62    1.64
 -15  -1   2    2.86    1.53
  15   1   2   -0.02    3.92
  15   1   2    5.25    3.54
  13   5  -2   13.98    4.75
  13   5   2   12.86    2.58
 -13   5  -2   14.05    3.83
 -13   5   2   11.61    4.34
  13  -5   2   17.11    6.56
  13  -5  -2   14.56    7.59
  13   5  -2   16.34    7.15
  13  -5   2   14.12    4.55
 -13  -5  -2   17.96    4.47
 -13   5  -2   15.16    4.76
  13   5  -2   17.21    3.98
  13   5   2    6.80    3.58
  13   5   2   16.85    6.44
 -13   5   2   19.24    6.42
  -7  -6  -6    2.04    2.25
  -7   6  -6    1.10    1.83
  -7  -6   6    0.72    0.82
   7   6  -6    3.31    1.90
  -7   6  -6    3.31    4.14
  -7   6   6    1.31    1.75
  -7  -6   6    2.88    2.20
  -7  -6  -6    3.51    2.56
   7   6  -6    4.05    4.12
   7   6   6    2.81    1.59
  -7   6   6    2.53    1.03
   7  -6  -6    3.19    2.13
   7  -6  -6    0.86    1.63
   7  -6   6    0.68    1.30
   7   6   6    4.83    3.46
  -4  -8   5   26.21    5.02
  -4   8   5   37.94   13.11
  -4   8  -5   29.01   11.87
   4  -8  -5   26.10   11.81
   4  -8   5   30.83    3.19
  -4  -8  -5   30.65    6.88
   4   8   5   31.38    9.62
  -4   8   5   30.59    4.57
   4   8   5   35.14    7.63
   4   8  -5   30.51   12.94
  -4   8  -5   30.11    9.44
   4   8  -5   27.42    6.73
  -4  -8  -5   27.20    6.26
   4  -8  -5   35.57   12.22
  -4  -8   5   24.80    5.28
  -1   0  -9  250.61   14.90
   1   0  -9  194.04   18.15
  -1   0  -9  226.30   14.12
  -1   0   9  231.13   17.12
   1   0   9  216.31    9.43
   1   0   9  222.97    8.11
  -1   0   9  205.12   18.58
   1   0  -9  239.42   12.93
   7  -1  -8    1.95    2.71
   7   1  -8    1.10    1.32
  -7   1   8    0.10    1.02
  -7   1  -8    3.55    2.92
   7   1  -8    1.31    3.44
  -7   1  -8    1.95    2.55
   7  -1   8    2.46    1.95
   7  -1   8    3.44    2.61
  -7   1   8    1.63    2.01
   7   1   8    4.00    4.86
  -7  -1   8    5.86    4.55
  -7  -1   8    1.36    1.96
   7   1   8   -0.33    2.60
  -7  -1  -8   14.49   11.95
   7  -1  -8   -0.29    1.57
  -7  -1  -8    5.38    3.44
 -12   6  -2    1.17    1.40
 -12   6   2    3.16    1.65
 -12  -6  -2    2.46    1.55
 -12   6   2    2.94    2.75
  12   6   2    0.72    1.05
 -12   6  -2    0.84    1.84
  12  -6   2    6.10    3.73
  12  -6   2    4.30    3.81
  12  -6  -2    1.65    1.07
  12  -6  -2   -1.14    3.03
  12   6  -2   -0.50    2.69
  12   6  -2    0.92    1.62
  12   6   2    2.53    2.71
  12   6  -2    1.14    1.52
   8  -8   3    2.75    3.37
   8  -8  -3   -1.09    3.15
   8   8   3    2.47    2.09
  -8  -8  -3    0.07    1.05
   8   8  -3    0.94    0.84
   8  -8  -3    2.85    2.75
   8   8  -3    1.30    1.81
  -8  -8   3    2.92    1.37
  -8  -8  -3    0.40    1.59
  -8   8   3   -0.64    2.31
   8  -8   3    4.14    3.93
  -8   8  -3    2.90    2.15
  -8   8  -3    1.61    1.58
   8   8   3    3.10    1.36
   2   9   4  113.07   14.51
   2  -9  -4  124.46   13.02
  -2   9   4  129.52   16.56
  -2   9   4  127.60   12.90
  -2   9  -4  133.18   17.95
   2  -9   4  131.03   12.37
  -2  -9   4  123.50   11.93
  -2   9  -4  102.23   14.47
   2   9  -4  106.89   13.19
  -2  -9  -4  125.45   11.59
   2  -9  -4   86.80   13.10
  -2  -9  -4  113.82   12.89
   2   9   4   99.83   11.51
  -2  -9   4  124.31   13.74
   0  -1  -9    3.07    3.74
   0   1  -9    4.69    1.85
   0  -1   9    2.14    2.86
   0   1   9    1.10    2.61
   0  -1  -9    5.43    2.62
   0   1   9    2.04    2.55
   2  10  -1    3.78    2.92
  -2  10  -1    1.48    1.41
   2  10  -1    8.40    2.38
  -2  10   1    1.38    1.43
  -2  10   1    5.65    3.28
  -2  10  -1    1.40    1.16
  -2 -10  -1    3.56    2.27
   2  10   1    1.17    2.84
   2 -10  -1    0.92    2.06
   2  10   1    1.41    1.78
   2 -10   1    0.34    1.58
  -2  10   1    1.54    1.85
  -2 -10   1    3.15    2.59
  -5  -9  -3   16.51    3.22
   5   9   3   24.55    8.63
   5   9  -3   20.34    9.39
   5  -9  -3   20.97   10.26
  -5  -9  -3   22.30    8.95
  -5   9  -3    9.87    3.30
  -5   9   3   23.94    7.23
   5  -9   3   23.99    9.46
   5  -9  -3   19.22    5.31
  -5  -9   3   21.38    6.91
   5   9   3   23.02    7.43
   5   9  -3   17.77    6.16
  -5   9  -3   32.85   16.62
  -5   9   3   20.36    5.60
   5  -9   3   18.70    7.84
   5   9  -3   14.79    3.26
  10  -7   3    7.36    3.59
  10  -7   3   10.18    4.56
 -10   7   3    3.42    2.42
  10  -7  -3    5.77    1.70
 -10   7  -3    8.76    3.71
 -10  -7   3    7.86    2.88
 -10  -7  -3    7.44    2.97
 -10   7  -3    2.71    2.07
  10   7  -3    9.64    3.81
 -10  -7  -3   10.57    4.58
  10   7  -3   13.25    5.00
  10  -7  -3   11.91    6.04
  10   7   3    7.53    2.39
  10  -7  -3    7.74    4.20
  10   7  -3    5.38    2.48
   7  -9   1   32.05   11.62
  -7  -9   1   29.23    6.15
  -7   9  -1   23.05    4.01
   7  -9  -1   26.45    2.99
   7  -9   1   22.28    3.13
  -7   9   1   31.64    5.72
   7   9   1   31.32    4.54
   7  -9  -1   33.68   15.98
   7   9   1   28.76    9.00
   7   9  -1   33.33    9.84
  -7  -9  -1   37.54    9.08
   7   9  -1   27.51   10.25
  -7   9  -1   28.79    5.40
  -7   9   1   27.03    7.92
  -1  -1  -9   66.59    9.51
  -1   1  -9   83.62   18.56
  -1   1  -9   76.75   15.45
   1   1  -9   62.61    7.59
  -1   1   9   73.15    9.53
  -1  -1   9   64.34   10.31
   1  -1  -9   79.05   10.87
   1   1   9   67.59   11.00
   1   1   9   57.91    8.16
  -1  -1  -9   67.00    9.03
   1  -1   9   70.01   16.33
   1  -1  -9   66.96    8.66
  -1   1   9   68.48    9.65
  -1   1  -9   62.29    7.80
  -4   4  -8    9.95    4.10
  -4   4   8   10.39    4.62
  -4   4   8   12.27    6.73
   4   4   8   12.61    4.34
   4   4   8    9.88    3.50
  -4  -4  -8    9.69    4.49
   4   4  -8    9.92    4.38
   4  -4  -8   10.51    3.36
  -4   4  -8    6.68    5.48
   4  -4   8   15.42    8.48
   4  -4  -8   14.26    5.82
   4  -4   8   12.44    6.34
  -4  -4   8   18.88    5.71
  -4  -4  -8   16.46    5.13
   4   4  -8   16.03    6.45
 -13   0   5  227.40   13.91
 -13   0  -5  266.86   16.15
  13   0   5  320.36   19.39
  13   0  -5  234.50   14.50
  13   0  -5  216.96   11.41
  13   0   5  325.03   18.79
   9  -8   2   32.42   12.95
   9  -8   2   27.37   10.14
  -9   8   2   37.37   11.00
   9   8  -2   23.18    4.09
   9   8  -2   33.49    8.74
   9   8   2   27.41    4.38
  -9   8  -2   31.26    7.70
  -9  -8   2   34.03    4.65
   9   8   2   28.64    7.28
   9  -8  -2   36.10   11.53
   9   8  -2   22.65    3.48
  -9   8  -2   27.73    9.01
   9  -8  -2   21.94    5.45
  -9  -8  -2   44.60   12.90
  -2   0   9    0.80    1.70
   2   0  -9    1.31    2.68
  -2   0  -9    0.43    1.33
   2   0   9   -1.95    4.85
  -2   0   9    0.43    4.70
  -2   0  -9    1.34    1.22
   2   0  -9   -0.01    1.12
  -9  -7  -4    1.67    1.56
  -9   7   4    0.49    1.54
   9  -7   4    1.05    2.09
   9   7   4    3.33    1.76
  -9   7  -4    3.82    2.55
  -9  -7  -4    2.57    4.17
  -9  -7   4    1.34    1.41
   9  -7  -4   14.50    6.75
   9   7  -4    7.44    2.43
   9   7  -4    4.33    1.98
   9   7   4    1.15    3.13
   9  -7   4   16.00    6.18
   9  -7  -4   13.44    6.65
  -9   7  -4    1.72    1.54
  14   0   4   24.71    9.31
 -14   0  -4   18.68    6.19
 -14   0   4   22.87    6.37
  14   0  -4   19.50    6.31
  14   0  -4   25.70    8.85
  14   0  -4   16.62    3.04
  14   0   4   21.05    4.62
   3  10   0   15.67    5.26
   3 -10   0   10.68    4.08
  -3 -10   0    9.03    4.48
  -3  10   0   13.91    4.94
   3  10   0   10.15    6.81
  -3  10   0    3.92    1.72
  14   3  -3    1.77    3.62
 -14   3  -3   -0.74    1.75
  14   3  -3    1.98    1.25
  14  -3   3    4.83    5.06
 -14   3  -3    0.99    1.14
 -14  -3  -3    1.54    1.95
  14   3  -3    4.29    2.48
  14  -3  -3    4.92    3.02
 -14   3   3    4.03    2.17
  14  -3  -3    3.94    2.84
  14  -3   3    6.37    3.60
  14   3   3    3.20    4.12
 -14  -3   3    3.57    2.08
 -10  -4  -6    9.66    6.40
 -10   4  -6   28.09    9.22
  10  -4  -6    8.56    2.89
 -10  -4  -6    5.56    3.61
  10   4  -6    6.29    3.55
 -10   4  -6    9.64    4.37
  10  -4  -6   12.87    4.18
  10   4  -6    6.12    4.14
 -10  -4   6    8.66    2.53
  10  -4   6    7.04    5.27
  10   4   6    1.67    2.39
  10   4  -6    7.90    3.83
  10  -4   6    2.88    3.41
 -10   4   6    6.69    4.12
  10   4   6    0.50    0.93
  10   0   7    4.01    2.98
 -10   0  -7    5.83    4.35
  10   0  -7    1.57    3.02
 -10   0   7    0.82    1.04
  10   0   7   -1.50    3.47
  10   0  -7    2.01    2.75
  -4   6   7    6.72    3.67
  -4   6   7    4.64    3.68
  -4  -6  -7    6.75    2.62
  -4   6  -7   11.05    4.35
   4   6  -7    4.02    5.76
   4  -6  -7    9.10    3.70
   4  -6   7   15.23    6.16
  -4   6  -7    7.30    5.39
   4   6   7    3.29    3.22
   4  -6  -7    6.44    4.08
  -4  -6  -7    8.04    3.84
   4   6   7    5.86    3.03
   4  -6   7    7.15    2.51
  13   1   5    2.38    2.28
  13  -1  -5    1.76    3.47
  13   1  -5    0.67    2.09
 -13  -1  -5    2.87    2.05
 -13   1  -5    4.83    3.22
 -13   1  -5    5.73    2.20
 -13  -1   5    3.40    3.45
  13   1   5    2.59    1.72
  13  -1   5    2.16    2.64
 -13  -1   5    2.79    0.92
 -13   1   5    0.78    2.47
  13  -1   5    6.18    4.71
  13   1  -5    3.96    2.35
  13  -1  -5    1.62    2.18
   2  -1  -9    2.55    2.25
  -2  -1  -9    7.99    3.11
   2   1   9    1.24    2.50
  -2   1  -9    5.19    4.20
   2   1  -9    3.02    1.02
  -2   1   9    2.10    2.43
   2  -1   9    4.67    5.86
   2  -1  -9    3.39    1.91
  -2   1  -9    1.12    1.54
   2   1   9    1.48    3.28
  -2   1   9   -1.49    2.77
  -2   1  -9    3.80    3.16
  -2  -1  -9    4.11    1.86
 -14   4  -2   18.14    7.34
  14  -4   2   25.39    8.35
  14   4  -2   22.61   13.60
  14  -4  -2   25.48    8.08
  14   4   2   22.48    8.24
  14  -4   2   25.96    7.72
 -14   4   2   24.23    6.65
  14  -4  -2   17.00    2.92
  14   4  -2   21.46    6.68
  14   4  -2   21.36    6.39
 -14  -4  -2   22.49    5.88
 -14   4  -2   18.29    3.60
 -14   4   2   21.36    4.65
 -14   1  -4  103.49    5.09
 -14   1   4  144.28   14.09
 -14  -1   4  131.54   16.27
  14  -1  -4  133.01   16.68
  14  -1  -4  125.96   17.63
  14   1  -4  122.75   12.64
  14   1  -4  118.98   15.85
  14   1   4  120.89   20.87
  14   1  -4  112.13   10.79
 -14   1  -4  134.33   15.17
  14  -1   4  137.42   14.62
 -14  -1  -4  138.30   15.37
  14   1   4  164.80   20.20
  14  -1   4  135.50   15.08
  -9  -5   6   21.51    6.58
   9   5  -6   14.65    7.26
   9  -5   6   10.93    5.62
   9  -5  -6   25.01    7.80
   9  -5   6   13.92    6.93
  -9  -5  -6   19.28    5.59
   9   5  -6   14.64    7.14
   9  -5  -6   14.25   10.25
   9   5  -6   16.77    6.74
  -9  -5  -6   16.35    5.79
  -9   5  -6    8.94    3.56
  -9   5  -6   15.27    6.53
  -9   5   6   25.68    9.28
   6   3  -8   92.88   14.69
   6   3   8   72.99    8.95
  -6   3   8   52.92    5.85
  -6  -3   8   78.04    9.58
   6  -3  -8  107.56   16.29
   6   3   8   63.38   13.17
  -6   3   8  137.76   13.77
   6  -3   8   60.57    8.99
   6  -3   8   84.63   20.04
  -6  -3  -8   83.13   13.59
  -6   3  -8   62.07   13.17
   6  -3  -8   75.32   14.51
  -6  -3  -8   79.87   14.64
   5  -7   6    8.01    7.99
  -5   7   6    6.11    2.71
   5  -7  -6   29.32    8.14
   5   7   6    0.11    3.34
   5   7  -6   53.80   12.12
  -5   7  -6   15.47    6.21
   5  -7   6   20.52    4.77
   5   7  -6   82.14   17.98
  -5   7  -6   14.28    7.12
  -5   7   6   59.96   11.00
   5   7   6   13.91    5.71
   5  -7  -6   23.40    8.03
  -5  -7  -6   41.68   12.32
  -5  -7   6   20.77    5.71
  -5  -7   6   21.23    4.00
  -8   4  -7   16.03    6.02
  -8   4   7   22.36    2.60
  -8   4   7   20.44    8.21
   8   4   7   20.03    8.57
   8   4  -7   16.41    4.54
  -8  -4   7   14.61    6.88
   8  -4   7   21.47   10.36
   8  -4  -7   18.03    8.85
   8  -4  -7   22.44   10.07
   8   4   7   13.75    4.42
  -8  -4  -7   22.65    5.34
   8   4  -7   18.97    8.91
  -8   4  -7   18.74    9.38
  -8  -4  -7   19.61    6.33
   8   4  -7   17.98    6.27
   8  -4   7   16.90    5.88
   3  -9   4    3.24    2.96
   3   9   4    4.54    2.77
   3   9  -4    4.17    1.48
  -3   9  -4   -0.09    1.86
   3   9   4    0.71    1.40
   3  -9   4    4.54    4.04
  -3  -9  -4    7.39    6.22
   3  -9  -4   14.10    5.42
  -3  -9   4    2.89    2.04
  -3   9   4    7.58    3.26
   3  -9  -4    4.77    1.73
  -3  -9   4    4.35    2.48
   3   9  -4    3.89    5.30
  -3  -9  -4    1.40    1.02
  -3   9  -4    3.20    2.99
  15  -3   0    5.57    3.17
  15  -3   0    1.28    2.31
  15   3   0   -0.48    3.87
 -15   3   0    0.09    2.21
 -15  -3   0   -0.05    1.31
 -15   3   0    2.30    3.89
  15   3   0    3.08    3.11
 -15  -3   0    0.85    0.66
   0 -10   2   96.11   10.92
   0  10  -2   77.76    9.53
   0  10   2   93.84   15.00
   0  10   2   96.42   11.53
   0 -10  -2   93.46   10.71
   7  -8   4   30.91   11.19
  -7  -8   4   20.82    8.73
   7  -8  -4   36.86    8.54
  -7  -8  -4   22.86    8.62
   7   8  -4   13.82    3.63
  -7   8   4   32.59    6.82
   7   8   4   19.52    5.42
  -7  -8  -4   20.95    6.53
  -7   8  -4    9.54    3.60
   7   8  -4   28.71   14.81
  -7   8  -4   22.59    8.61
   7   8  -4   34.61    6.77
   7  -8   4   23.74   11.20
   7   8   4   20.85    6.19
  -7   8   4   20.62    4.12
 -15   2   2   35.62    8.99
  15  -2  -2   28.65   11.00
 -15  -2   2   24.27    4.72
  15   2  -2   22.74    6.66
 -15   2   2   33.39    8.57
  15  -2  -2   21.39    3.21
  15  -2   2   29.03    8.85
  15   2   2   27.72   10.00
 -15  -2  -2   27.92    8.52
  15   2  -2   35.01   11.65
 -15   2  -2   20.53    8.36
  15  -2   2   29.86    8.87
 -15   2  -2   23.27    4.00
 -15  -2   2   25.31    4.98
  -3  10  -1  107.41   14.98
  -3 -10  -1  105.32   10.31
  -3 -10   1   99.55   13.10
   3 -10  -1  112.88   15.24
   3 -10   1  105.42    9.67
   3  10   1   89.59   10.13
  -3  10   1  106.85   14.94
   3  10   1  110.96   14.74
   3  10  -1  114.83   13.13
   3 -10   1  109.89   10.59
   9   3  -7    5.86    2.62
  -9  -3  -7    5.42    3.18
  -9   3  -7    5.33    3.75
  -9  -3  -7    4.28    3.91
   9   3  -7    5.07    3.36
   9  -3  -7    8.03    5.57
   9  -3  -7    2.02    2.19
   9   3  -7    3.92    1.71
   9  -3   7    5.08    3.06
  -9  -3   7    2.08    1.06
   9   3   7    2.67    2.82
  -9   3   7    4.06    2.09
   9   3   7    2.72    2.46
  -9   3  -7    7.73    3.19
  10   1  -7   15.43    4.76
  10   1   7    6.94    3.37
 -10  -1   7   10.24    2.30
  10  -1   7   14.04    5.25
 -10  -1   7   13.75    6.23
 -10  -1  -7    4.81    3.43
 -10   1  -7    1.68    2.01
  10  -1  -7   14.77    5.08
  10  -1   7    7.18    3.33
 -10   1   7   17.39    8.04
  10   1   7    4.57    4.20
  10   1   7   11.36    4.31
 -10   1  -7    3.79    3.15
  10   1  -7   11.68    3.35
   7   2  -8   -1.53    3.72
  -7   2  -8    4.99    2.72
  -7  -2  -8    3.58    3.05
   7  -2  -8    2.97    1.98
   7  -2   8    5.90    4.40
  -7   2   8    3.14    1.42
   7  -2  -8    4.23    4.19
  -7  -2  -8    4.19    5.11
   7   2  -8    5.92    4.07
  -7   2   8    0.76    1.87
  -7  -2   8    5.80    3.29
   7  -2   8    3.95    1.89
   7   2   8    2.61    2.15
  -7   2  -8   -0.08    3.31
   7   2  -8   14.46    3.51
  -1  10  -2    3.09    2.03
  -1  10  -2    2.52    2.38
  -1  10   2    4.62    2.44
   1  10  -2    9.65    5.78
   1 -10  -2    8.11    4.75
   1 -10   2    7.44    3.43
   1 -10   2    7.56    3.44
  -1 -10  -2    2.53    3.15
  -1 -10   2    2.66    2.19
   1  10   2    2.75    2.67
   1  10   2    1.29    1.97
  -1  10   2    5.51    3.42
   0  -5  -8    1.57    1.92
   0   5   8    2.15    2.24
   0   5  -8    0.77    2.89
   0   5  -8    1.46    3.25
   0  -5  -8    0.07    2.45
   0  -5   8    2.49    2.88
   0   5   8    1.29    1.60
  11  -7  -2    9.81    3.43
  11   7   2   12.19    4.73
 -11  -7  -2   12.57    3.77
 -11   7  -2    7.70    4.43
 -11  -7   2    7.29    3.34
  11   7  -2   12.49    4.74
 -11   7   2    4.97    1.63
  11   7   2    8.15    2.75
  11  -7  -2    3.35    4.06
 -11   7  -2    1.28    1.51
 -11  -7  -2    6.87    3.81
 -11   7   2    1.63    1.53
  11   7  -2    3.75    1.89
  11  -7   2    8.72    3.71
  11  -7   2    8.64    5.67
   3   0   9  147.37   14.04
   3   0  -9  200.15   17.62
   3   0  -9  172.46   17.66
  -3   0  -9  167.95   18.25
  -3   0  -9  196.11   17.66
  -3   0   9  190.35   22.15
   3   0   9  176.30   16.56
   0   2  -9    0.37    1.30
   0   2   9    0.92    1.84
   0   2   9    2.66    1.90
   0   2  -9    8.05    4.51
   0   2  -9    0.72    0.88
   0  -2   9    0.83    1.68
   0  -2  -9    4.32    4.02
   0  -2  -9    4.52    2.19
 -11   3   6    9.94    5.04
  11   3  -6    9.30    4.57
  11   3  -6    7.84    3.12
 -11   3  -6   11.04    3.49
 -11  -3  -6   10.62    5.22
  11   3   6   11.97    5.40
  11  -3   6    8.43    3.89
  11   3  -6   11.00    3.47
  11  -3  -6    8.12    3.56
  11  -3  -6    8.36    3.75
 -11  -3   6    7.21    2.50
 -11   3  -6    6.96    3.75
  11  -3   6   16.49    7.47
  11   3   6    5.73    2.09
   1   5   8    2.02    3.02
  -1   5   8    2.31    2.91
   1   5  -8    2.19    2.58
   1  -5  -8    1.47    3.01
   1   5  -8    3.87    3.36
  -1  -5  -8    3.12    1.80
   1  -5  -8    2.05    2.51
  -1   5  -8    2.68    2.01
  -1   5  -8    1.70    2.31
   1   5   8    1.08    1.43
  -1  -5   8    6.79    4.78
  -1  -5  -8    2.56    2.12
  -1   5   8    4.10    3.21
   5   8   5  108.51   10.51
  -5   8   5  130.53   12.47
  -5   8  -5   99.21   16.78
   5   8  -5  148.38   14.95
   5   8  -5  110.77   14.43
   5  -8  -5  129.90   17.05
  -5  -8  -5  126.71   11.10
  -5   8  -5  116.34   16.27
  -5  -8   5  110.01   13.09
   5  -8  -5   98.32   15.10
  -5  -8  -5  105.60   13.92
   5  -8   5  121.03   11.95
  -5  -8   5  113.50   10.61
   5  -8   5  107.65   10.64
   5   8   5  119.43   14.36
  -5   8   5  124.43   13.67
  15  -3   1  181.31   16.74
 -15   3  -1  196.04   16.99
  15  -3  -1  197.27   18.73
 -15   3   1  194.84   17.93
  15   3   1  179.31   33.93
 -15   3   1  182.76   16.02
 -15  -3   1  171.67   15.36
  15   3  -1  215.19   19.22
  15   3  -1  188.99   17.31
 -15  -3  -1  169.88   14.78
 -15   3  -1  161.08   14.97
  15  -3   1  282.02   20.99
   1   2  -9    1.26    1.13
   1  -2  -9   -0.11    2.59
  -1   2  -9    0.73    0.89
  -1  -2  -9    1.19    1.57
   1  -2  -9   -0.06    1.67
   1   2  -9    2.23    3.83
  -1  -2   9    6.40    3.96
   1  -2   9    3.70    2.68
   1   2   9    3.86    2.69
  -1   2   9    0.22    3.08
  -1   2   9    1.91    1.93
   1   2   9    3.01    2.96
  -1   2  -9    1.25    2.17
   1   2  -9    2.10    3.17
  -1   2  -9    2.56    2.78
  -1  -2  -9    3.16    1.53
 -12   5   4   25.43    8.90
  12   5   4   21.37    3.30
  12   5   4    3.02    3.13
 -12  -5  -4   32.23    9.70
 -12   5  -4   11.32    5.86
  12   5  -4   22.92    7.10
  12  -5  -4   20.05    6.11
 -12   5  -4   20.74    4.07
  12  -5  -4   26.84    9.11
  12  -5   4   25.96    9.71
  12   5  -4   30.90    7.40
  12  -5   4   24.53   10.31
  12   5  -4   26.43    7.01
  12   5  -4   22.15    5.87
 -10   8   0  134.35   11.95
 -10   8   0  156.38   18.91
  10   8   0  131.07   15.13
  10   8   0  162.61   14.55
  10  -8   0  137.22   12.56
  10  -8   0  146.92   14.63
 -10  -8   0  139.22   16.80
  -2  10   2    3.86    2.02
   2 -10   2    4.72    3.93
  -2 -10   2    6.66    3.85
   2  10  -2    8.32    2.85
   2  10   2    3.17    1.90
  -2 -10  -2    5.87    3.46
  -2  10  -2    2.02    2.11
   2  10   2    4.13    3.53
   2  10  -2    9.44    4.72
   2  10  -2    3.97    1.93
   2 -10  -2    8.16    3.97
   2 -10   2    3.50    1.85
  12   0  -6  280.85   17.35
 -12   0  -6  244.63   20.63
  12   0   6  283.94   17.64
  12   0   6  226.13   16.63
 -12   0   6  280.93   16.29
  12   0  -6  243.77   14.56
  -3   1  -9   79.54    8.78
   3  -1  -9   82.12   16.12
  -3  -1   9   64.08    9.76
   3   1   9   67.64    9.06
   3   1  -9   67.66    8.94
  -3   1  -9   76.62   11.95
   3   1  -9   69.13   12.10
   3  -1  -9   74.09   11.51
  -3  -1  -9   74.21   10.02
   3  -1   9   65.70   17.27
  -3   1   9   71.93    8.60
   3   1   9   88.70   14.13
  -3   1  -9   84.69   15.09
  -3  -1  -9   78.07   12.67
   4  10   0   29.93   10.06
   4 -10   0   30.93    6.62
  -4 -10   0   26.60    5.32
  -4  10   0   34.79    7.66
   4  10   0   29.64    4.47
   4 -10   0   31.21   10.06
  -4  10   0   29.15    5.20
  -7   9  -2    3.35    2.43
   7   9   2   15.40    9.67
   7   9  -2   19.99    5.23
   7  -9   2   28.91    5.33
  -7   9   2   13.79   10.62
   7   9   2   15.27    4.90
  -7   9  -2   11.70    4.79
  -7  -9   2   10.07    3.33
   7  -9   2   12.78    4.98
   7  -9  -2   17.76   10.94
   7   9  -2   38.42    9.70
  -7  -9  -2   16.89   12.00
  -5   4  -8    3.99    3.81
  -5   4  -8    0.67    2.65
  -5   4   8    2.37    2.75
   5   4   8   -0.97    2.38
   5  -4   8    0.30    1.23
   5   4  -8    6.65    4.12
   5   4  -8    2.25    1.54
   5  -4  -8    2.44    2.76
   5   4   8   -0.25    2.82
  -5   4   8    0.65    1.18
   5  -4   8    3.88    2.54
   5  -4  -8    2.54    2.16
  -5  -4  -8    1.65    3.39
  -5  -4  -8    2.46    2.43
  -2  -5  -8   50.12    8.01
   2  -5   8   58.08   12.20
   2   5  -8   56.92    9.35
   2   5   8   57.00    7.24
   2   5   8   58.13   12.64
   2  -5   8   36.05    5.79
   2  -5  -8   44.32    7.23
  -2   5  -8   60.04   14.18
   2   5  -8   50.98   10.40
  -2   5   8   42.49    9.62
  -2  -5  -8   52.33   12.91
  -2   5   8   54.55    7.55
   2  -5  -8   45.50    4.68
  -2   5  -8   53.46   18.91
  -2  -5   8   50.46   10.00
  15   0   3 1122.45   56.00
 -15   0   3 1050.66   51.07
  15   0  -3 1028.79   49.35
 -15   0  -3 1145.95   56.05
   7   5   7    3.57    3.14
  -7  -5   7    1.93    2.03
   7  -5   7    1.67    2.54
   7  -5   7    8.52    5.56
  -7  -5  -7    4.70    3.31
   7  -5  -7    2.91    1.93
  -7   5   7    5.95    2.90
   7  -5  -7    2.20    2.87
   7   5   7    4.49    1.88
   7   5  -7    3.01    3.50
  -7   5  -7    2.40    3.10
  -7  -5  -7    1.87    2.61
  -7   5  -7   12.02    8.91
  -7   5   7    2.47    1.54
   7   5  -7    8.09    4.78
 -13   2  -5  136.84   14.13
 -13  -2  -5  126.90   19.62
  13  -2   5  153.43   21.27
 -13   2   5  118.59   13.77
  13   2  -5  126.21   15.15
  13   2  -5  108.88   11.20
 -13  -2   5  129.39   16.05
 -13   2  -5  117.88   13.74
  13   2   5  178.07   21.66
  13  -2   5  129.53   22.42
  13  -2  -5  116.67   12.53
  13   2   5  138.16   21.97
  -2  -2  -9    6.65    3.92
  -2   2   9    3.11    2.58
   2   2  -9    4.65    3.35
  -2   2  -9    8.06    4.50
   2  -2  -9    3.88    3.68
   2   2   9    3.71    2.65
  -2   2  -9    3.91    1.08
  -2  -2  -9    1.73    1.96
   2  -2  -9    2.78    3.04
   2  -2   9   -1.33    3.94
  -2   2   9    4.20    3.11
  -2  -2   9    1.71    1.94
   2   2   9    2.53    3.46
   2   2  -9    2.70    2.07
   6  -9   3    7.68    4.47
   6   9   3    4.42    3.96
   6   9   3    5.29    2.37
  -6  -9  -3    9.08    5.98
  -6   9   3   12.98    3.37
   6  -9   3   10.49    5.34
   6   9  -3   11.26    4.87
  -6   9  -3    6.35    2.51
   6   9  -3    5.01    1.46
  -6   9  -3    8.15    3.42
  -6   9   3   18.64    4.74
   6  -9  -3   14.58    4.67
  -6  -9   3    6.89    3.31
   6  -9  -3   12.24    5.53
   6   9  -3   10.16    3.13
  12   1  -6   39.76   10.61
 -12  -1   6   37.72   13.82
 -12   1   6   33.22    9.97
  12   1  -6   29.94    9.28
 -12   1  -6   37.61    6.73
  12  -1  -6   42.07    8.47
  12   1   6   38.95   12.84
  12  -1   6   38.45   12.61
  12   1   6   42.81   13.79
  12  -1   6   46.17   14.74
 -12   1  -6   34.64    5.72
 -12  -1  -6   49.44   15.13
  12  -1  -6   35.76   10.14
  11  -6  -4    0.38    1.24
 -11   6  -4    2.25    1.78
  11   6  -4    4.10    4.02
  11  -6   4    1.93    1.99
 -11   6   4   -0.63    2.68
  11   6  -4   -0.44    2.35
 -11  -6  -4    0.20    1.56
  11  -6  -4    0.26    0.73
  11   6   4    0.88    1.46
 -11   6  -4   -0.08    2.36
  11  -6  -4    0.85    2.80
  11  -6   4    1.45    1.95
  -8  -7  -5    5.94    4.37
   8   7  -5   11.90    5.38
   8  -7  -5    9.91    6.02
   8  -7  -5    9.54    4.67
   8   7  -5    2.32    2.32
   8   7   5    3.04    2.02
  -8  -7   5    5.79    1.98
   8   7   5    4.42    5.32
  -8  -7  -5    4.89    3.53
  -8   7  -5    2.07    2.20
  -8  -7   5   10.49    3.41
  -8   7  -5    6.45    2.78
   8  -7   5    1.61    2.26
   8  -7   5    9.41    4.25
  -8   7   5   10.50    4.31
 -14   2   4   18.42    6.20
 -14   2  -4   10.15    3.00
 -14  -2  -4   16.22    5.11
 -14   2  -4   15.56    5.25
  14   2  -4   13.94    6.42
  14   2   4   17.56    4.93
  14  -2  -4   18.66    5.68
  14  -2   4   21.83    9.28
  14   2  -4   15.00    8.52
  14   2   4   12.44    4.62
  14  -2   4   23.84    8.40
 -14  -2   4   12.45    4.37
  14   2  -4   12.33    3.58
   8   0  -8   81.39   14.13
   8   0  -8   74.44   15.10
   8   0   8  100.46   24.38
  -8   0  -8   96.50   19.80
  -8   0   8   83.51   16.35
   8   0   8   94.37   20.20
  -8   0   8   72.03   11.94
  10  -8   1   10.43    5.62
 -10  -8  -1    4.40    3.06
 -10  -8  -1    5.91    1.85
 -10   8   1    3.76    2.64
 -10   8   1    3.34    4.84
  10  -8  -1    8.83    3.88
  10  -8   1    5.76    2.93
 -10   8  -1   -0.19    1.96
  10   8  -1    9.01    3.19
 -10  -8   1   11.00    4.17
  10   8   1    9.54    2.83
  10   8  -1    6.48    2.40
  10   8   1   12.17    4.31
 -10   8  -1    2.80    2.58
  10  -8  -1    7.96    3.51
   4  -9   4  146.16   13.18
  -4  -9   4  128.95   14.77
  -4  -9  -4  147.12   13.03
   4   9  -4  106.67   11.83
  -4  -9   4  136.75   13.84
   4   9   4  135.43   12.40
  -4   9  -4  125.25   15.11
   4   9  -4  141.70   20.07
  -4   9   4  155.27   14.86
   4  -9  -4  160.81   16.61
  -4  -9  -4  144.32   17.18
  -4   9   4  149.95   18.17
   4  -9  -4  143.94   14.61
   4   9   4  136.54   12.71
   4  -9   4  142.50   14.98
  -4   9  -4  135.34   15.54
   4  10   1    7.73    2.86
  -4  10   1   21.62    7.34
   4 -10   1    5.90    4.05
   4  10  -1    5.13    2.89
   4 -10   1    9.93    5.16
   4  10  -1   17.30    8.36
   4  10   1   10.30    4.81
  -4 -10  -1    7.98    5.54
  -4  10  -1    6.49    3.48
  -4  10   1   12.40    4.66
  -4  10   1   12.25    4.53
   4 -10  -1   16.26    5.92
  -4 -10   1    3.93    4.05
  11   5  -5  389.10   22.06
  11  -5  -5  369.43   23.43
  11   5  -5  352.33   24.72
  11   5  -5  400.69   21.81
  11  -5   5  429.76   24.26
 -11   5   5  388.95   22.94
 -11   5  -5  348.48   18.67
  11  -5   5  448.73   23.84
  11  -5  -5  378.49   20.83
 -11   5  -5  418.43   25.13
  11   5  -5  375.00   21.08
 -11  -5  -5  361.90   20.67
  13  -6   0    1.52    1.96
  13   6   0    1.53    2.87
 -13   6   0    1.10    2.05
 -13  -6   0    0.78    1.22
  13   6   0    3.48    3.29
 -13   6   0   -0.24    1.92
  13  -6   0    3.04    2.74
  13   6   0    1.41    1.92
  13  -4   4    1.01    2.12
  13  -4  -4    3.52    2.71
  13   4  -4    3.67    1.94
  13   4   4    3.41    5.31
  13  -4   4    6.23    4.40
 -13   4  -4    1.31    1.70
  13   4  -4    4.00    3.51
  13   4   4    2.62    4.63
 -13   4  -4    2.26    1.79
  13   4  -4    7.61    2.44
  13  -4  -4    5.65    2.28
 -13   4   4    6.73    3.07
  13   4  -4   -0.82    2.37
 -13  -4  -4    1.32    2.30
  -8   9   0  275.27   15.04
   8   9   0  292.31   18.28
  -8   9   0  272.86   15.35
   8  -9   0  263.30   14.79
  -8  -9   0  292.91   16.63
   8  -9   0  322.78   18.42
   5  -6  -7  421.49   22.97
   5  -6   7  360.04   22.34
  -5  -6   7  382.26   20.77
  -5  -6  -7  313.70   26.92
   5   6  -7  441.13   23.13
   5  -6   7  370.00   19.10
   5  -6  -7  384.31   22.44
   5   6   7  355.50   21.21
  -5  -6  -7  380.26   22.54
  -5   6  -7  354.19   25.37
  -5   6  -7  358.83   24.63
  -5   6   7  409.25   22.12
   5   6   7  430.64   23.44
  10  -2  -7   28.23    4.94
  10   2   7   36.50   12.01
  10  -2  -7   33.75    7.75
 -10   2  -7   31.19    8.41
 -10   2  -7   52.50   13.86
 -10  -2  -7   38.71   12.94
 -10  -2   7   42.31   12.62
 -10   2   7   41.12   12.95
  10   2  -7   28.27    5.67
 -10  -2   7   26.15    6.03
  10   2  -7   29.77    6.19
  10  -2   7   34.75    8.95
  10   2   7   34.47    7.92
 -15   1  -3  111.02   14.63
  15  -1  -3   81.33    8.58
 -15  -1   3   95.58   13.56
  15   1   3  141.92   15.93
  15  -1   3  134.98   14.43
 -15   1   3   92.03   12.33
  15   1  -3   62.62   13.70
  15  -1  -3   73.39   10.32
  15   1  -3   81.58   13.15
 -15  -1  -3  114.62   14.83
  15  -1  -3   82.81   10.05
  15   1   3  134.47   17.33
  15  -1   3  124.93   18.97
  15   1  -3   90.91   11.18
 -13  -5  -3   33.83    7.20
  13  -5  -3   39.07    9.39
  13  -5   3   83.68   12.45
  13   5  -3   31.99    8.51
  13   5  -3   30.06   11.68
 -13   5  -3   27.45    9.85
  13   5  -3   41.34    9.62
  13  -5   3   91.37   13.03
  13   5  -3   32.01    9.84
  13   5   3   29.83    3.51
 -13   5  -3   35.28    6.63
 -13   5   3   42.91    8.50
  13  -5  -3   27.34    4.29
  13  -5  -3   36.25   11.00
  -8   6   6   30.73    5.57
   8   6  -6   26.85    7.02
  -8   6  -6   42.82   12.17
   8  -6  -6   32.88   11.08
   8  -6   6   32.44    7.81
  -8  -6   6   29.46    8.48
   8  -6   6   43.41   14.83
   8   6  -6   31.92    8.53
  -8   6  -6   37.20   10.17
  -8  -6  -6   59.80   11.77
   8   6   6   47.84   15.60
   8   6   6   32.88    4.86
  -8   6   6   41.69   12.78
  -8  -6  -6   32.69    5.52
  -8  -6   6   26.66    4.89
   8  -6  -6   31.80   13.81
 -14   5   0  296.35   16.91
  14   5   0  284.94   20.36
 -14  -5   0  269.68   13.97
  14   5   0  292.08   18.42
  14  -5   0  276.07   18.44
  14  -5   0  262.52   15.58
  14   5   0  248.86   17.04
  -4   0   9    2.61    2.45
   4   0   9    2.41    3.68
   4   0  -9    3.55    3.20
  -4   0  -9    0.24    2.05
   4   0   9   -0.15    3.30
  -4   0   9    0.96    3.47
  -4   0  -9    0.51    1.82
   4   0  -9   -0.01    1.13
  12  -6  -3    1.57    2.55
  12   6  -3    1.95    2.38
 -12  -6  -3    5.18    3.02
 -12   6  -3    1.08    1.23
  12   6  -3    1.82    3.51
  12   6   3    1.48    0.88
 -12  -6  -3    5.35    3.02
  12  -6  -3    0.75    1.85
  12  -6   3   -0.05    2.54
  12  -6  -3    1.73    1.47
  12  -6   3    1.56    1.09
  12   6   3    5.76    3.41
  12   6  -3    2.26    2.27
 -12   6  -3    3.01    2.07
 -12   6   3   -0.09    1.74
   8  -1  -8   33.12    8.44
   8   1  -8   34.29    7.30
   8  -1   8   36.37   12.04
   8  -1  -8   38.24   11.28
  -8   1  -8   35.31   11.93
  -8  -1   8   29.54    6.97
  -8   1  -8   32.37   10.41
   8  -1   8   39.23   11.21
  -8   1   8   37.57   10.83
  -8   1   8   32.97    6.27
   8   1   8   49.11   13.79
  -8  -1   8   46.82   15.67
   8   1   8   39.83   10.47
  -8  -1  -8   39.93   13.68
   8   1  -8   34.70    9.84
   3 -10  -2    5.97    2.81
   3 -10   2   -0.28    1.92
   3 -10   2    1.80    2.51
  -3  10  -2    2.20    1.28
  -3  10   2    2.40    2.49
  -3 -10   2    2.38    2.96
  -3 -10  -2    3.82    3.73
  -3  10  -2    0.36    0.80
   3  10   2    2.68    2.04
   3  10  -2    6.96    3.90
  -3  10   2    0.84    1.73
   3  10  -2    3.66    2.05
   3  10   2    5.32    4.21
  12  -4   5    0.83    1.68
 -12   4   5    1.86    1.60
  12  -4  -5    0.25    1.70
  12   4  -5    0.53    1.55
 -12  -4  -5    4.12    3.44
 -12   4  -5    2.59    2.70
 -12   4  -5    3.45    3.22
  12   4  -5    2.91    5.63
  12  -4   5    3.57    3.52
  12  -4  -5    3.81    2.38
  12   4   5    3.10    3.22
  12   4  -5    5.01    2.54
  12   4  -5    3.22    2.70
  12   4   5    5.66    4.15
  16   0   0  133.60   13.34
  16   0   0  150.76   18.58
 -16   0   0  101.98   12.35
   0  -8  -6  520.87   27.45
   0  -8   6  540.28   26.80
   0  -8   6  555.75   28.80
   0   8  -6  512.47   27.15
   0   8   6  575.41   29.21
   0   8  -6  531.97   28.60
   0  -8  -6  530.59   26.90
   0   8   6  540.33   27.49
  -3   5  -8    0.98    2.94
  -3   5  -8    2.48    2.92
  -3  -5  -8    2.34    1.23
   3  -5  -8    1.94    3.52
   3  -5  -8    1.82    2.94
  -3  -5  -8    3.17    2.06
   3   5  -8    3.10    2.36
   3  -5   8    1.66    1.38
  -3  -5   8    2.06    4.07
   3   5   8    0.28    1.24
  -3   5   8    1.50    2.83
   3   5   8   -0.36    2.60
 -13   6  -1   66.90    9.35
 -13  -6  -1   69.47    7.59
 -13   6   1   67.28   10.34
 -13   6  -1   65.34    9.28
  13   6  -1   63.35   11.07
 -13  -6   1   66.79    9.43
  13  -6  -1   78.26   10.76
  13  -6   1   57.41    7.80
  13  -6  -1   55.86    9.56
  13   6   1   67.53   16.29
  13  -6   1   66.79    9.67
 -13   6   1   71.43   10.53
  13   6  -1   59.06   10.08
  13   6   1   61.78    7.37
  13   6   1   73.00   13.34
  13   6  -1   83.39   11.55
   8   9  -1    6.62    3.37
  -8   9  -1    5.50    2.88
  -8   9   1    9.83    3.17
  -8   9  -1    3.78    1.65
  -8  -9  -1    6.97    3.16
   8   9   1    9.91    4.76
   8   9   1    7.41    2.89
   8  -9  -1    7.77    5.13
  -8   9   1    5.34    2.24
   8   9  -1    8.15    5.34
   8  -9   1    9.45    5.57
   8  -9  -1    6.33    3.01
  -8  -9   1   10.36    3.12
   8  -9   1    4.87    2.45
   6   7  -6  101.82   17.66
  -6   7  -6  122.71   17.07
  -6  -7   6   93.71   10.40
  -6  -7  -6  116.86   13.85
  -6  -7  -6  105.02   10.68
  -6   7  -6  107.26   13.84
   6  -7  -6  118.55   13.18
   6  -7  -6  114.25   11.38
   6   7  -6   92.34   10.24
  -1  -8   6    2.77    0.98
  -1  -8  -6    4.55    3.04
  -1   8   6    4.03    2.70
  -1  -8   6    5.22    2.96
  -1  -8  -6    1.24    2.38
   1   8   6    4.77    2.18
  -1   8  -6    4.53    2.55
   1   8  -6    4.23    2.57
   1  -8   6    2.16    1.24
   1  -8   6    0.36    3.50
  -1   8  -6    6.33    3.90
   1  -8  -6    4.72    3.66
   1   8   6    4.39    2.45
  -1   8   6    1.14    1.61
   1   8  -6    6.37    3.98
   1  -8  -6    5.02    3.00
  -4  -1  -9   10.99    4.65
  -4   1  -9    8.54    2.67
   4   1   9    7.90    5.52
   4   1  -9    7.62    3.18
  -4  -1   9    6.01    5.15
   4  -1   9    9.23    4.77
  -4   1   9   -1.28    3.87
   4   1  -9    8.66    2.89
   4  -1  -9    9.66    3.14
  -4   1   9    0.79    2.64
  -4   1  -9   14.89    5.45
  -4  -1  -9   11.00    3.28
   4   1   9   10.43    4.04
   4  -1  -9   10.15    3.91
  -4   1  -9   13.45    5.05
   3  -2  -9    0.32    2.85
   3   2  -9   -0.16    3.50
   3   2   9    7.62    4.52
   3  -2   9    9.62    5.34
   3   2   9    5.93    4.34
  -3   2  -9    2.57    1.52
  -3  -2   9    3.76    4.50
  -3  -2  -9    4.49    2.13
   3  -2  -9    5.43    2.91
  -3   2   9    2.12    2.10
  -3  -2  -9    5.50    4.93
   3   2  -9    4.39    3.14
  -3   2  -9   10.22    4.86
   9  -8   3  344.65   22.05
   9  -8  -3  315.53   22.33
   9  -8  -3  307.33   19.75
  -9  -8  -3  320.72   19.81
  -9   8  -3  296.99   16.53
   9   8  -3  288.51   16.17
   9   8   3  303.92   16.26
   9   8  -3  308.71   15.81
  -9   8  -3  280.33   16.51
   9   8  -3  277.17   15.96
  -9  -8   3  306.08   19.68
   9   8   3  297.42   17.65
   9  -8   3  322.27   22.73
  -9   8   3  331.98   18.06
   9  -8  -3  281.11   14.86
  14   5  -1    1.74    1.18
 -14  -5   1    2.38    1.22
  14  -5   1    1.80    2.83
  14  -5  -1    2.49    2.16
  14   5  -1    1.10    2.93
  14   5   1    3.04    1.82
  14  -5  -1    1.78    1.70
  14   5   1    3.61    6.13
  14   5  -1    1.75    1.93
 -14   5   1    1.86    1.65
  14  -5   1    4.73    3.32
 -14   5  -1    3.68    1.76
  14   5   1    0.58    1.74
 -15  -3   2   37.29    5.61
  15   3  -2   35.63    6.04
 -15   3   2   39.73    7.33
 -15   3  -2   42.74    7.05
 -15   3   2   49.81   12.30
  15   3   2   56.32   12.66
  15   3  -2   38.73   13.78
  15  -3   2   39.50    9.88
  15  -3   2   31.45    6.78
 -15   3  -2   30.72    6.06
 -15  -3   2   43.52   10.25
  15  -3  -2   38.09    5.79
 -15  -3  -2   37.96   11.24
  15  -3  -2   40.77   12.51
 -10  -6  -5    5.37    2.40
  10  -6  -5    6.44    3.70
  10  -6  -5    9.89    5.71
  10  -6   5    6.69    2.94
  10   6  -5    2.23    2.42
  10   6   5    4.04    5.62
  10  -6   5    2.27    3.28
  10   6   5    4.57    1.76
 -10   6   5    3.11    3.17
 -10   6  -5    2.40    3.03
 -10   6  -5    3.21    2.71
 -10  -6  -5    6.50    6.94
 -16   1   0  137.66   12.26
  16   1   0  168.67   16.74
  16   1   0  160.21   18.83
 -16  -1   0  164.64   14.58
 -16   1   0  154.51   14.43
  16  -1   0  190.38   16.76
   7  -3  -8    2.50    1.19
   7   3  -8    0.23    2.11
  -7  -3  -8    4.12    3.61
   7  -3  -8    0.80    1.03
   7   3  -8    5.98    3.11
  -7   3  -8    0.32    2.50
  -7   3   8    2.54    3.74
   7   3   8   -1.10    2.66
  -7  -3  -8    2.23    3.05
   7   3   8    3.37    1.98
   7  -3   8    1.64    3.62
  -7  -3   8    2.11    3.20
   7  -3   8    0.52    2.61
  -7   3   8    1.43    1.45
  12  -7   0   73.13   10.43
  12  -7   0   65.56   10.19
 -12   7   0   79.93   14.81
  12   7   0   80.33    9.66
 -12  -7   0   74.41   11.57
  12   7   0   60.71    9.97
 -12   7   0   80.48   12.23
 -16   0   1    0.39    0.85
 -16   0   1   -0.08    2.05
  16   0   1    1.48    2.62
  16   0   1    4.40    4.04
  16   0  -1   -0.42    1.32
 -16   0  -1   -0.00    1.45
  16   0  -1   -1.18    1.64
   0  -7  -7    1.28    1.34
   0  -7  -7    3.78    3.58
   0   7   7    4.85    2.69
   0   7   7    5.16    4.56
   0   7  -7    5.20    3.71
   0   7  -7    0.67    2.79
   0  -7   7    4.15    1.03
   0  -7   7    1.21    1.89
   5 -10   0    2.68    3.20
   5 -10   0    1.26    1.74
  -5  10   0    7.14    3.59
  -5 -10   0    0.26    1.37
   5  10   0    7.25    2.65
  -5  10   0   -0.14    1.46
   5  10   0   -0.56    2.72
 -12  -2  -6  252.25   15.71
 -12   2  -6  261.97   20.47
  12   2   6  301.03   27.08
  12   2   6  313.46   23.49
  12  -2   6  360.05   21.18
  12  -2   6  320.36   22.87
  12   2  -6  259.61   18.06
  12  -2  -6  266.98   19.32
  12   2  -6  239.46   15.58
 -12   2  -6  268.74   16.99
  12   2   6  272.90   13.96
 -12  -2   6  246.76   16.00
 -12  -2   6  248.68   13.39
  12  -2  -6  251.38   15.30
 -12   2   6  275.50   15.87
   6  -8  -5   12.01    7.92
  -6  -8   5   12.16    3.88
   6   8   5   13.60    4.22
  -6   8  -5   12.74    5.11
  -6  -8   5   19.71    6.85
   6  -8  -5   28.33    6.28
   6   8  -5   25.67    7.74
  -6   8   5   32.16    8.78
  -6   8  -5   13.59    7.19
  -6  -8  -5    9.92    3.76
   6   8  -5   15.65    3.49
   6  -8   5   10.81    4.00
  -6  -8  -5   13.29    5.49
   6  -8   5   19.77    7.23
   6   8   5    9.92    4.80
  -6   8   5   17.92    4.72
   0   3  -9    4.89    4.26
   0  -3  -9    7.00    3.94
   0  -3  -9    6.94    3.22
   0  -3   9   10.83    4.29
   0   3   9    7.05    3.24
   0   3  -9    6.77    3.31
   0   3   9    8.89    4.21
 -14   4   3   21.82    6.66
 -14  -4  -3   17.80    5.72
  14  -4   3   10.45    5.05
  14   4  -3   12.84    4.85
  14   4   3    4.09    1.78
 -14   4  -3   11.84    6.49
  14  -4  -3   16.27    4.23
  14   4  -3   16.96    8.45
  14   4  -3   13.85    5.34
 -14   4  -3   15.89    3.54
  14   4  -3   16.55    3.84
  14  -4  -3   20.44    8.67
  14   4   3   15.17    6.90
  14  -4   3   16.38    7.81
   2   8  -6   29.61   16.41
  -2  -8   6   16.42    3.14
   2  -8   6   22.86    6.55
  -2   8  -6   22.17    7.01
  -2  -8   6   26.99   10.18
   2  -8   6   24.74    8.02
  -2   8  -6   25.06    8.54
   2   8   6   23.62    7.92
   2  -8  -6   22.48    9.61
   2  -8  -6   28.14   10.22
  -2  -8  -6   15.02    7.37
   2   8   6   30.17   10.39
  -2   8   6   22.93    4.05
   2   8  -6   19.41    7.02
  -2  -8  -6   24.18    7.32
  -2   8   6   22.93    8.20
  -1   7   7    0.56    2.05
   1   7  -7    2.21    2.17
  -1  -7  -7    3.86    3.36
   1  -7  -7    2.03    1.67
  -1   7   7    3.50    3.34
   1   7   7    5.27    3.49
   1  -7   7    1.54    1.34
   1   7   7    3.93    2.62
  -1  -7  -7    3.00    2.62
   1  -7  -7    0.23    1.91
  -1  -7   7    2.53    2.87
  -1   7  -7    5.42    4.35
  -1   7  -7    5.73    3.31
   1  -7   7    3.31    1.34
   1   7  -7    1.52    2.98
   0 -10   3   18.24    6.87
   0  10  -3   13.59    9.18
   0  10   3    0.78    6.03
   0 -10   3   12.30    4.67
   0  10   3   -0.51    2.09
   0 -10  -3    2.21    1.38
   0 -10  -3    2.37    2.29
 -15   2  -3   76.16   10.23
  15   2  -3   83.30   10.47
 -15  -2   3   70.88   10.01
  15  -2   3   86.35   14.26
  15  -2  -3   82.43   10.05
  15   2   3   95.77   11.09
  15   2  -3   78.24   13.81
 -15   2   3   89.02   11.34
 -15  -2  -3   86.51   11.44
 -15   2  -3   98.20   16.60
  15  -2   3   64.16   12.51
  15   2  -3   68.27   12.88
  15  -2  -3   81.70   13.41
  15   2   3   65.57   11.00
  -1   3   9   13.45    6.35
   1  -3   9    5.32    5.91
   1   3  -9    9.21    4.09
   1   3  -9   14.92    5.66
   1   3   9   11.58    7.07
   1   3   9   14.03    5.94
  -1  -3  -9   11.52    3.99
  -1   3   9   14.13    5.61
  -1   3  -9   15.69    5.86
  -1  -3   9   20.16    6.69
   1  -3  -9   13.35    5.01
  -1   3  -9   12.39    2.79
  -1  -3  -9   12.88    4.20
  -1   3  -9   13.45    8.73
   1  -3  -9   13.51    3.56
  -8  -8  -4  358.10   19.07
  -8   8  -4  368.21   23.72
  -8   8  -4  381.73   20.59
   8   8  -4  409.37   20.57
   8   8  -4  393.28   21.65
   8   8   4  439.28   24.14
   8   8  -4  507.17   26.14
   8  -8   4  403.05   22.25
   8  -8   4  381.96   20.03
   8  -8  -4  545.16   33.30
  -8  -8  -4  401.48   21.99
   8   8   4  487.57   25.35
  -8   8   4  438.42   22.51
  -8  -8   4  414.16   21.35
 -16  -1   1   64.25   10.54
 -16   1   1   56.15    8.52
 -16  -1   1   51.61    7.77
  16  -1  -1   66.33    7.62
  16  -1   1   54.38    8.94
  16   1   1   67.05   19.77
  16   1  -1   58.52    8.26
  16  -1  -1   58.04   10.09
  16  -1   1   56.45    9.08
 -16   1   1   66.63   12.37
 -16  -1  -1   62.04   13.08
 -16   1  -1   61.99    9.02
 -10  -8  -2   36.98   10.40
  10  -8  -2   29.10    5.45
 -10  -8   2   41.87   10.80
 -10   8  -2   36.16    5.99
 -10   8   2   35.55    6.02
 -10   8  -2   35.28    5.64
  10   8  -2   32.73    5.36
 -10   8   2   36.57    7.18
  10  -8  -2   30.53   10.33
  10  -8   2   34.52    5.18
  10  -8   2   44.24   11.00
 -10  -8  -2   26.20    3.54
  10   8  -2   24.83    4.94
  10   8   2   34.17    4.45
  12   7  -1    3.85    2.55
  12   7   1    5.30    4.27
 -12  -7  -1    4.63    3.64
  12  -7  -1    5.15    4.40
 -12   7  -1   -0.31    1.86
 -12  -7   1    6.64    3.56
  12   7  -1    6.57    3.16
 -12   7  -1    0.14    2.02
 -12   7   1    1.16    1.83
  12   7   1    4.24    1.95
  12  -7   1    3.95    3.07
 -12  -7   1    2.23    1.60
  12  -7   1    1.89    2.45
  12  -7  -1    5.74    2.28
 -12   7   1   -1.03    2.41
  -1  10   3   98.19   11.39
  -1  10  -3   86.64   10.84
   1 -10  -3   90.04   10.44
   1 -10   3   93.75   12.20
  -1 -10   3   99.56   14.06
  -1 -10  -3   91.36    9.87
   1 -10  -3   92.69   14.00
  -1 -10  -3   91.83   13.57
   1  10   3  107.63   10.54
   1 -10   3   95.64   11.19
  -1  10   3  100.97   14.51
   1  10   3   95.57   11.93
  -1  10  -3  106.54   20.78
  -1 -10   3   97.05   11.55
   5  -9   4    1.30    2.34
  -5  -9  -4    0.72    1.03
  -5  -9  -4    2.55    1.95
   5  -9   4    3.04    2.84
  -5   9   4   10.14    7.15
  -5   9  -4   -0.19    2.73
   5   9  -4    5.19    3.94
  -5   9  -4    4.60    3.86
   5   9  -4    1.18    1.45
  -5  -9   4    3.78    3.30
   5   9   4    1.32    1.96
   5  -9  -4    9.17    4.93
  -5   9   4   12.18    5.21
   5   9   4   -0.24    2.92
   5  -9  -4   10.58    7.34
  -5  -9   4    2.01    2.20
  10   7  -4  285.18   14.89
  10  -7  -4  306.23   15.39
  10  -7   4  297.35   17.20
 -10  -7   4  310.59   17.24
  10   7  -4  264.92   17.38
  10  -7  -4  341.03   19.63
  10  -7  -4  308.49   17.25
 -10  -7  -4  261.61   14.16
  10   7  -4  250.90   13.70
 -10   7  -4  295.38   18.41
 -10   7   4  331.86   18.23
  -8  -2  -8   21.79    8.07
   8   2   8   19.94    6.89
  -8   2   8   12.27    3.38
   8   2   8   17.87    6.36
   8  -2  -8   17.95    6.98
  -8  -2  -8   22.01    6.11
   8  -2   8   18.31    8.64
  -8   2   8   21.34    9.04
  -8   2  -8   20.98    8.03
   8  -2   8   24.27   11.27
   8  -2  -8   17.75    7.46
  -8   2  -8   20.00    7.69
   8   2  -8   12.99    3.64
   8   2  -8   10.44    7.47
  -8  -2   8   19.30    6.01
   4 -10  -2    1.67    2.78
  -4 -10  -2    2.24    2.65
   4  10  -2    2.29    2.08
   4 -10   2    0.53    1.89
   4  10  -2    2.04    3.38
  -4  10   2    2.51    2.34
  -4 -10   2    0.53    1.86
   4  10   2   -0.02    1.66
  -4  10   2    2.87    2.74
   4 -10   2    1.32    2.82
   4  10   2    0.78    1.77
  -4  10  -2    1.29    2.17
   6   4  -8   98.30   17.59
   6  -4   8  125.75   21.59
   6   4   8  164.92   15.50
  -6   4   8  107.44   10.42
   6  -4  -8  110.42   11.57
   6   4   8  126.69   12.96
  -6   4   8  128.47   14.53
  -6   4  -8  101.15   17.99
   6  -4  -8  110.58   11.10
   6  -4   8  126.13   14.13
  -6  -4   8  116.54   14.93
  -6  -4  -8  116.37   18.02
  -6  -4  -8  107.55   16.50
  -6   4  -8  118.70   20.52
   6   4  -8  107.98   20.42
   5 -10   1   54.10    6.70
   5  10   1   63.92    7.56
  -5  10  -1   80.39   11.57
   5  10   1   59.15   10.28
  -5  10   1   75.65   15.42
   5  10  -1   91.59   11.07
   5 -10   1   65.41    8.96
   5 -10  -1   56.97    7.53
   5  10  -1   64.05   12.78
  -5  10   1   59.58    9.05
  -5 -10   1   60.36    9.83
  -5 -10  -1   55.46    6.98
  11   7  -3    6.70    2.07
  11  -7  -3   13.04   12.09
 -11  -7  -3    9.75    2.91
 -11   7  -3    9.63    3.67
 -11   7   3   10.40    7.18
  11   7   3   14.75    5.14
  11   7  -3    8.70    3.50
  11  -7   3   10.50    3.66
 -11  -7  -3    9.93    3.90
  11   7   3   12.39    4.30
  11  -7  -3    7.85    3.38
  11  -7   3   -0.25    2.57
  11   7  -3    9.31    3.99
 -11   7  -3   10.64    3.47
 -11  -7   3   11.19    4.33
 -15   4   0    1.55    1.78
 -15  -4   0    3.83    1.88
  15   4   0    1.02    2.20
 -15   4   0   -0.14    1.19
  15   4   0   -0.08    0.66
  15   4   0    4.16    2.86
  15  -4   0    1.56    2.14
  15  -4   0   -0.59    2.01
   9   4  -7  138.55   16.06
   9  -4  -7  148.28   18.52
  -9  -4  -7  129.26   16.53
   9  -4  -7  138.14   14.52
   9  -4   7  160.77   19.49
   9   4  -7  129.04   14.32
  -9   4  -7  146.67   21.27
  -9   4  -7  153.34   21.07
  -9  -4  -7  140.05   13.33
  -9  -4   7  152.62   13.83
   9   4   7  158.21   15.12
   9   4   7  143.51   14.17
  -9   4   7  160.65   15.19
   9   4  -7  129.54   17.43
   4   5  -8  376.53   20.56
  -4   5  -8  413.13   26.08
  -4  -5   8  389.55   24.23
   4  -5   8  358.74   18.74
   4  -5  -8  401.56   23.78
  -4   5  -8  387.81   23.25
   4  -5  -8  384.08   20.88
  -4   5   8  528.60   27.16
   4   5  -8  396.63   23.62
  -4  -5  -8  422.20   22.65
   4  -5   8  372.82   21.19
   4   5   8  384.21   21.18
   4   5   8  401.03   23.33
  -4  -5  -8  386.80   21.00
  -2  -7  -7    1.24    2.33
   2   7   7    0.23    2.75
  -2   7   7    0.11    1.99
   2  -7  -7    3.81    4.24
  -2   7   7   -0.85    2.69
  -2   7  -7    3.99    4.19
   2  -7   7    0.87    0.85
   2   7  -7   -0.18    1.95
   2  -7  -7    3.76    2.38
  -2  -7  -7    3.05    2.44
   2   7   7    1.51    1.47
   2  -7   7    1.31    2.71
   2   7  -7    2.57    3.43
  -2   7  -7    0.22    2.93
   0   9   5   -0.50    1.85
   0   9  -5    2.40    2.29
   0   9  -5    3.21    2.34
   0  -9   5    1.39    1.19
   0  -9   5    0.86    2.25
   0  -9  -5    2.23    2.54
   0  -9  -5    3.30    2.23
   0   9   5    2.53    2.22
 -13   3   5  183.91   17.15
 -13   3  -5  197.60   22.51
  13   3  -5  177.93   18.42
  13   3  -5  179.26   15.94
  13  -3  -5  165.66   22.38
 -13  -3  -5  194.66   19.98
  13  -3  -5  235.55   15.03
  13   3  -5  178.93   16.15
  13  -3   5  214.31   19.81
  13   3   5  175.08   23.29
  13  -3   5  182.73   25.38
  13   3   5  212.54   24.04
 -13   3  -5  192.88   18.92
  13   3  -5  203.95   26.00
  -5   0  -9   28.42    8.41
   5   0  -9   24.24    5.36
  -5   0   9   32.47   11.66
   5   0   9   62.74   20.59
  -5   0   9   32.54   18.49
  -5   0  -9   30.09    9.12
   2   3  -9   22.80    7.45
  -2   3   9   29.92   11.14
   2  -3  -9   26.54    8.80
   2  -3  -9   23.54    6.79
   2   3   9   25.19    8.16
  -2  -3  -9   27.33   13.92
  -2   3  -9   23.73    3.13
   2   3   9   27.14   10.07
  -2  -3  -9   27.07    9.57
   2  -3   9   30.44    9.24
  -2   3  -9   25.79   11.21
  -2   3  -9   32.23   10.89
  -2   3   9   20.50    3.59
   2   3  -9   24.59    9.23
   4  -2  -9   16.81    5.79
  -4   2   9    9.69    5.54
   4   2   9   12.92    7.93
  -4   2   9   34.17   16.68
   4   2   9    6.86    5.17
   4  -2  -9    9.15    5.00
  -4  -2  -9   11.44    8.10
  -4   2  -9   13.32    3.97
   4   2  -9   11.17    5.18
   4   2  -9   10.41    4.61
   4  -2   9    9.48    9.30
  -4   2  -9   10.75    3.02
  -4  -2  -9   11.10    3.03
  14  -3  -4   77.58   14.92
 -14   3  -4  101.22   19.48
  14   3  -4   81.74   11.81
  14  -3   4  101.64   12.14
  14   3   4  136.50   22.09
 -14  -3  -4   89.83   15.53
  14  -3   4  106.50   20.27
  14   3   4   96.01   18.56
 -14   3  -4   80.49   12.36
 -14   3   4   92.51   13.98
 -14  -3   4   89.47   11.36
  14   3  -4   83.13   10.67
  14   3  -4   76.93    9.46
  14  -3  -4   81.70   11.29
  -1   9  -5   52.63   10.27
   1  -9   5   66.59    8.73
  -1  -9   5   77.89   10.12
   1  -9   5   65.30    7.18
  -1   9   5   66.23    7.69
   1   9   5   54.35    6.43
  -1  -9   5   69.70    9.25
   1   9  -5   64.86    8.58
  -1  -9  -5   58.12   11.58
  -1  -9  -5   71.81    9.59
  -1   9   5   73.52   11.25
  -1   9  -5   58.33   13.16
   1   9   5   65.28    7.75
   1   9  -5   84.55   13.29
   1  -9  -5   59.84    8.47
 -11  -4  -6    8.08    3.64
 -11   4   6    8.06    4.46
  11   4  -6    6.27    4.18
 -11   4  -6   10.92    4.66
 -11  -4   6    6.53    2.40
  11   4   6    9.12    4.70
  11  -4   6   11.36    8.36
  11  -4   6   17.14    9.93
  11   4  -6   12.83    4.07
  11   4  -6   12.17    6.18
  11  -4  -6    8.40    5.07
 -11  -4  -6    9.37    3.76
  11  -4  -6   17.79    7.46
  10  -5  -6  113.51   17.26
  10  -5   6  123.91   19.98
 -10   5   6  122.10   13.51
  10  -5  -6  112.68   14.14
 -10   5  -6  116.86   23.04
 -10   5  -6  100.98   16.77
  10   5  -6  108.32   12.11
  10  -5   6  107.10   15.56
 -10  -5   6  104.04    8.12
  10   5   6  120.35   11.17
  10   5  -6  103.64    9.35
 -10  -5  -6  107.22   18.51
  10   5  -6  109.92   27.74
 -10  -5  -6   97.22   13.69
  -6  -6   7   14.31    4.77
  -6   6   7   10.06    2.75
   6  -6  -7   11.83    4.55
   6  -6  -7    8.44    7.39
   6   6  -7   16.84    7.51
  -6   6  -7    7.86    3.45
  -6  -6  -7   11.93    7.17
   6   6   7   12.48    3.80
   6  -6   7   10.03    4.09
   6   6  -7   17.80    8.28
  -6   6  -7   14.50    4.45
  -6   6   7    6.52    5.54
  -6  -6  -7   10.09    5.77
   6  -6   7   18.60    9.14
   6   6   7   -0.97    3.30
  -2  10  -3    6.19    3.01
   2  10  -3   17.40    4.50
  -2  10  -3    5.48    2.73
   2  10   3    5.55    2.06
  -2  10   3    5.84    3.18
  -2  10   3    6.47    3.47
  -2 -10  -3    8.22    7.27
   2  10   3    5.76    3.54
  -2 -10   3   12.65    4.01
  -2 -10   3    6.59    2.90
   2 -10   3    9.22    3.73
   2 -10  -3    1.89    1.91
   2 -10  -3    8.09    2.91
   2 -10   3   11.75    4.96
  -2 -10  -3    5.53    2.94
   2  10  -3    5.05    3.19
   3   8   6   32.74    6.61
  -3  -8  -6   45.00   12.28
   3  -8  -6   37.45    9.64
   3  -8  -6   38.11   12.98
  -3   8   6   39.96    5.30
  -3  -8   6   30.24    6.15
   3  -8   6   44.05    4.89
  -3   8  -6   51.17   15.72
  -3   8  -6   40.12   13.71
   3   8  -6   68.32   12.68
   3  -8   6   73.51    9.41
  -3  -8  -6   36.31    5.48
   3   8   6   62.16    8.30
  -3   8   6   49.85   10.22
 -13   6  -2    9.91    3.46
  13   6   2    7.79    2.28
  13   6  -2   10.97    4.26
 -13   6   2   11.12    4.13
  13   6  -2   10.74    3.94
  13  -6  -2   11.63   11.26
 -13  -6  -2   12.03    3.38
  13  -6   2   13.46    6.83
  13   6   2   11.94    5.56
 -13   6   2    8.88    3.83
  13   6  -2    9.99    4.52
 -13   6  -2    9.39    3.67
  13  -6   2    8.19    9.39
  13  -6  -2    2.80    3.87
  -7  -9  -3  230.10   13.60
   7  -9   3  207.06   18.17
   7  -9  -3  201.48   17.52
   7  -9  -3  199.92   18.24
  -7  -9   3  219.35    7.35
   7   9  -3  202.57   16.88
  -7   9  -3  223.00    7.38
   7   9  -3  187.72   16.80
  -7   9  -3  220.72    7.44
   7   9   3  217.16    6.42
  -7   9   3  230.21   13.07
  -7   9   3  220.28    7.63
   7   9   3  217.64    7.66
   7  -9   3  198.23   18.93
   7   9  -3  198.10   18.36
 -16  -2   0    1.15    0.91
  16  -2   0    2.21    2.59
 -16   2   0    0.50    2.13
 -16   2   0    0.90    1.04
  16   2   0    5.17    2.82
  15  -4  -1   58.28   10.71
  15   4   1   73.61   12.90
 -15   4  -1   71.31   13.68
 -15  -4  -1   75.09   11.64
 -15   4   1   68.43   10.21
 -15  -4   1   77.80   10.04
  15   4  -1   67.70    8.52
 -15   4  -1   79.53    9.96
 -15   4   1   79.48    9.18
  15  -4   1   81.24   11.23
  15   4   1   97.35   25.72
  15   4  -1   84.46   25.52
  15  -4   1   73.28   17.63
  15   4  -1   86.19   11.36
  11   0  -7   22.10    7.40
 -11   0   7   23.07    4.73
 -11   0  -7    8.12    6.28
  11   0   7   11.21    5.69
 -11   0   7   26.79    8.85
  11   0  -7    9.16    6.28
  10  -3   7   53.66   15.95
  10  -3  -7   56.35    9.01
 -10   3   7   59.43   15.18
 -10   3  -7   56.04   12.60
  10   3   7   61.26   15.02
 -10  -3  -7   60.31   10.22
  10   3  -7   63.25   12.90
  10   3  -7   62.41   11.81
  10  -3  -7   57.56   12.65
 -10  -3  -7   57.36   11.91
  10  -3   7   64.15   21.00
  10   3  -7   45.56    5.19
 -10   3  -7   48.57    9.87
  -8   9   2   86.46    9.38
  -8   9  -2  103.46   12.38
   8   9  -2   88.27   16.05
   8  -9  -2   85.37    9.01
   8   9   2   86.71   11.45
   8  -9   2   84.99   10.92
   8  -9  -2   81.46    9.45
  -8   9  -2   55.77    8.36
  -8  -9  -2   96.55   16.14
  -8  -9   2   85.06   13.21
   8  -9   2   84.85   10.43
   8   9  -2   77.20   10.44
  -8   9   2   95.09   12.66
   8   9   2   88.76   12.31
   5  -1  -9  504.80   26.78
   5   1  -9  503.26   25.32
  -5  -1  -9  565.14   29.72
  -5   1  -9  549.43   28.63
   5   1  -9  480.27   25.14
  -5   1  -9  569.22   30.78
  -5  -1   9  441.02   23.67
   5  -1   9  449.49   29.74
  -5   1   9  497.56   26.84
   5   1   9  532.29   28.84
  -5   1  -9  552.58   34.38
  -5   1   9  503.09   26.80
   5  -1  -9  522.55   26.69
   5   1   9  507.20   27.95
  -5  -1   9  433.53   23.37
  -5  -1  -9  547.39   29.39
  14   5  -2    8.99    2.51
  14   5  -2    8.14    2.76
  14  -5  -2    7.94    2.88
 -14   5   2    6.09    2.99
  14   5   2    7.48    2.39
  14  -5  -2    6.13    2.14
  14  -5   2    6.45    2.91
  14   5   2    4.54    3.36
 -14   5  -2    7.87    2.13
  14   5  -2    8.83    3.15
  14  -5   2    7.48    3.06
  14   5   2    1.66    3.65
  -8   5   7   11.43    3.58
  -8   5   7   11.60    4.78
   8   5   7   14.81    4.02
  -8   5  -7   16.33    5.68
   8   5  -7   14.72    4.52
  -8   5  -7   23.38    6.12
   8  -5   7   21.55    4.23
   8  -5  -7   18.81    6.80
  -8  -5  -7   17.52    7.38
   8   5  -7   13.75    5.03
  -8  -5  -7   16.05    5.44
   8  -5  -7   12.62    4.01
  -8  -5   7   12.78    6.46
   8   5   7   23.92    9.66
   2  -9   5   40.15    5.93
  -2  -9  -5   39.45    6.61
   2  -9  -5   40.88    7.55
  -2  -9  -5   35.16    4.95
   2  -9   5   42.50    7.77
  -2   9   5   36.41    8.27
  -2   9  -5   42.91   13.12
  -2  -9   5   31.57    7.39
   2   9  -5   43.94    6.93
  -2   9  -5   38.90    5.05
   2   9   5   34.40    9.28
  -2   9   5   42.82   10.31
   2   9   5   37.60    8.84
  -2  -9   5   36.67    7.19
  16   0   2  114.45   12.66
  16   0  -2   70.72   10.87
  16   0   2  140.37   16.35
  16   0  -2   40.83    7.54
 -16   0   2   73.11   11.19
 -16   0   2   77.34   12.57
 -16   0  -2   93.68   14.27
 -11   1   7   49.86   13.32
  11   1   7   53.14   22.61
  11   1  -7   60.63   16.29
 -11  -1   7   51.80   13.20
  11  -1  -7   47.76    8.44
  11   1  -7   40.29   10.35
  11   1   7   71.96   10.39
 -11   1  -7   40.14    7.78
  11  -1   7   68.47   19.68
 -11  -1  -7   37.87   11.20
 -11   1  -7   50.08   12.96
 -11  -1   7   48.99    8.10
  -3  -7   7  183.90   16.60
   3  -7  -7  169.35   21.10
  -3  -7  -7  191.53   16.86
   3  -7   7  190.77   16.23
   3   7  -7  166.58   20.76
   3   7  -7  140.11   15.92
  -3  -7  -7  172.82   18.65
   3   7   7  202.09   26.55
  -3   7  -7  176.36   17.43
   3  -7   7  169.95   16.15
   3  -7  -7  164.26   15.08
  -3   7  -7  192.69   25.22
  -3   7   7  175.63   16.13
  -3   7   7  161.18   14.07
   3   7   7  205.63   18.85
  16  -2   1    4.35    3.49
  16   2  -1    1.76    2.22
  16  -2  -1   -0.15    1.06
 -16   2   1    4.17    2.43
 -16   2  -1    0.09    0.36
 -16  -2   1   -0.31    0.76
  16   2   1    5.39    4.24
  16  -2   1    0.41    2.80
 -16  -2   1    0.79    1.30
  16   2   1    4.33    3.55
 -16   2  -1   -0.05    2.07
 -16  -2  -1    1.39    1.45
  16  -2  -1    2.87    2.68
[truncated: 4,103,995 more chars]
